# Supplementary material for: 3D directional tuning in the orofacial sensorimotor cortex during natural feeding and drinking
Source: eLife. 2025 Oct 21;13:RP101325. doi: 10.7554/eLife.101325 (PMC12539803; doi:10.7554/eLife.101325)
Supplement: Figure 3—figure supplement 1—source data 1. [file elife-101325-fig3-figsupp1-data1.xlsx]

## Sheet: Sheet1
Figure 3 - figure supplement 1 - Source Data 1
Number of feeding trials in each group of directions
	Source Data
	AntSupL	AntSupR	AntInfL	AntInfR	PostSupL	PostSupR	PostInfL	PostInfR		Total
	956	1007	231	229	99	170	522	584		3798
	821	640	223	195	82	109	528	542		3140
	1205	741	536	242	161	190	416	479		3970
	417	406	180	185	81	105	333	250		1957
mean	849.75	698.5	292.5	212.75	105.75	143.5	449.75	463.75
