# Supplementary material for: 3D directional tuning in the orofacial sensorimotor cortex during natural feeding and drinking
Source: eLife. 2025 Oct 21;13:RP101325. doi: 10.7554/eLife.101325 (PMC12539803; doi:10.7554/eLife.101325)
Supplement: Figure 3—figure supplement 2—source data 1. [file elife-101325-fig3-figsupp2-data1.xlsx]

## Sheet: Sheet1
Figure 3 - figure supplement 2 - Source Data 1
Directionally modulated neurons during chews versus swallows
Source Data
Chews Monkey R				Swallows Monkey R
	% tuned	ste			% tuned	ste
rMIo	79.3103	7.52		rMIo	65.5172	8.83
cMIo	82.4	3.41		cMIo	69.6	4.11
SIo(3a/3b)	0	0		SIo(3a/3b)	11.1111	10.48
SIo(1/2)	58.6207	9.15		SIo(1/2)	41.3793	9.15
Chews Monkey Y				Swallows Monkey Y
	% tuned	ste			% tuned	ste
rMIo	67.8571	8.83		rMIo	78.5714	7.75
cMIo	88.1579	3.71		cMIo	64.4737	5.49
SIo(3a/3b)	50	11.79		SIo(3a/3b)	55.5556	11.71
SIo(1/2)	54.0541	8.19		SIo(1/2)	43.2432	8.14
Summary Statistics
Chews vs. Swallows
Monkey R				Monkey Y
	chi-stat	p-value			chi-stat	p-value
rMIo	1.38095	0.239939		rMIo	0.819512	0.365323
cMIo	5.61404	0.0178172		cMIo	11.7931	0.000594505
SIo(3a/3b)	1.05882	0.303484		SIo(3a/3b)	0.111455	0.738494
SIo(1/2)	1.72414	0.189161		SIo(1/2)	0.865497	0.352205
MIo	6.9873	0.00820903		MIo	5.84489	0.0156224
SIo	0.881159	0.347884		SIo	0.327273	0.567269
