# Supplementary material for: 3D directional tuning in the orofacial sensorimotor cortex during natural feeding and drinking
Source: eLife. 2025 Oct 21;13:RP101325. doi: 10.7554/eLife.101325 (PMC12539803; doi:10.7554/eLife.101325)
Supplement: Figure 3—source data 1. [file elife-101325-fig3-data1.xlsx]

## Sheet: Sheet1
Figure 3 - Source Data 1
Figure 3B: Percentage of directionally tuned neurons
Feeding				Drinking
	% tuned	ste			% tuned	ste
rM1	73.6842	5.83		rM1	50	6.8
cM1	82.0896	2.7		cM1	71.9723	2.64
SC(3a/3b)	40.7407	9.46		SC(3a/3b)	38.4615	7.79
SC(1/2)	56.0606	6.11		SC(1/2)	66.6667	4.36
Statistics
MIo vs. SIo
	chi-stat	p-value
Feeding	30.1418	4.01588e-08
Drinking	1.95078	0.162503
