# Supplementary material for: 3D directional tuning in the orofacial sensorimotor cortex during natural feeding and drinking
Source: eLife. 2025 Oct 21;13:RP101325. doi: 10.7554/eLife.101325 (PMC12539803; doi:10.7554/eLife.101325)
Supplement: Figure 4—source data 1. [file elife-101325-fig4-data1.xlsx]

## Sheet: Sheet1
Figure 4 - Source Data 1
Figure 4B: Proportion of neurons tuned to yaw and pitch
Yaw									Statistics
Monkey R				Monkey Y					MIo vs. SIo
	% tuned	ste			% tuned	ste			Monkey R				Monkey Y
rM1	87.6623	2.65		rM1	45.1923	4.88				chi-stat	p-value			chi-stat	p-value
cM1	64.7059	3.86		cM1	66.6667	4.79			3D angle	17.3989	3.03006e-05		Feeding	22.2086	2.44579e-06
SIo(3a/3b)	96.1039	1.56		SIo(3a/3b)	85.5769	3.45			Pitch	22.5216	2.0779e-06		Pitch	4.21159	0.0401488
SIo(1/2)	78.4314	3.33		SIo(1/2)	77.4194	4.34			Yaw	61.1152	5.38299e-15		Yaw	19.2358	1.15525e-05
Pitch
Monkey R				Monkey Y
	% tuned	ste			% tuned	ste
rM1	47.3684	8.1		rM1	30.9091	6.23
cM1	17.8571	7.24		cM1	47.3684	8.1
SIo(3a/3b)	60.5263	7.93		SIo(3a/3b)	61.8182	6.55
SIo(1/2)	39.2857	9.23		SIo(1/2)	50	8.11
