# Supplementary material for: 3D directional tuning in the orofacial sensorimotor cortex during natural feeding and drinking
Source: eLife. 2025 Oct 21;13:RP101325. doi: 10.7554/eLife.101325 (PMC12539803; doi:10.7554/eLife.101325)
Supplement: Figure 5—source data 1. [file elife-101325-fig5-data1.xlsx]

## Sheet: Sheet1
Figure 5 - Source Data 1
Figure 5A: Distribution of 3D preferred directions
Monkey R												Monkey Y
MIo						SIo						MIo						SIo
Control			Nerve Block			Control			Nerve Block			Control			Nerve Block			Control			Nerve Block
x	y	z	x	y	z	x	y	z	x	y	z	x	y	z	x	y	z	x	y	z	x	y	z
-0.318502	0.947922	-1.01209e-15	-0.896848	0.436926	-0.0689883	-0.527004	0.841633	-0.117986	0.247454	-0.751046	-0.612124	-0.576779	0.710913	0.402404	0.0130644	0.953699	-0.30048	0.819916	0.48064	-0.311003	-0.569931	0.812679	-0.121374
-0.598566	0.781998	0.173777	0.474578	0.662065	0.580039	-0.762493	0.457496	-0.457496	0.407661	0.791342	-0.455621	-0.794414	-0.164878	0.584569	0.890223	-0.150038	-0.430108	-0.692116	0.658021	0.296621	0.298809	0.911002	-0.284233
0.310375	0.931124	0.191508	-0.484876	0.866417	-0.119232	-0.299584	-0.576123	-0.760482	0.588464	0.79863	0.126099	0.0929367	-0.991325	-0.0929367	0.11762	-0.969189	0.216421	-0.319172	-0.918829	-0.232125	-0.83205	0.5547	2.72644e-15
-0.136108	0.987878	0.0746397	-0.653723	0.715395	0.246688	0.640156	0.765677	0.0627604	0.57735	0.237732	-0.781121	0.114336	0.96177	-0.24885	-0.529297	0.838054	0.132324	-0.0529421	-0.723542	0.688247	-0.16945	0.677799	-0.715455
-0.753907	0.655899	-0.0376953	-0.854401	0.476666	0.206855	0.674699	0.726599	0.12975	0.530669	0.833908	0.15162	-0.439353	-0.884894	0.154702	0.255549	0.435125	0.863343	-0.137189	-0.757524	0.638229	0.688247	-0.688247	0.229416
-0.88272	0.435475	-0.176544	-0.182466	-0.976732	-0.1127	0.938533	0.211927	-0.272477	0.383482	0.920358	0.0766965	0.980196	-0.196039	-0.0280056	-0.432128	0.881541	0.190136	-0.114876	0.880716	0.459504	-0.389118	-0.907943	0.155647
0.380188	-0.706063	0.597438	0.12458	0.95688	-0.262413	0.503027	0.845086	0.18109	0.902674	0.405549	0.143905	0.940188	0.020004	0.340068	0.95357	-0.233095	-0.190714	0.814544	0.456145	-0.358399	0.477219	0.393004	-0.786008
-0.540254	0.841502	-1.47149e-15	-0.0138293	0.98188	-0.189	0.533609	0.832429	0.14941	0.932645	0.3566	0.0548615	-0.894427	-0.447214	2.13163e-16	0.977863	-0.0992035	-0.184235	0.455621	0.887262	-0.0719402	0.649208	0.277389	-0.708227
-0.313937	-0.941811	0.120149	-0.605378	0.789413	0.101704	0.500709	0.841617	0.202414				-0.40372	0.914882	-1.36565e-15	0.421741	0.449857	-0.78725	0.296217	0.350075	-0.888652
-0.218081	-0.824913	-0.521497	0.896805	-0.424295	-0.12536	0.454019	0.866763	0.206372				-0.411233	0.878543	0.243001	0.49795	0.867179	-0.00677484	0.0455016	0.86453	0.500517
0.922635	0.0929787	-0.374299	-0.816188	0.544125	0.194331	0.130189	0.911322	-0.390567				0.508894	0.856746	-0.0837421	0.0856109	0.325321	0.94172	0.770029	0.46953	-0.431968
-0.0292165	0.891105	-0.452856	0.897253	-0.441272	-0.0147091	0.46993	0.86987	0.149978				0.144599	-0.933322	-0.328635	-0.383141	-0.877517	0.288386	-0.0501255	0.952384	-0.300753
0.0361906	0.995241	0.0904764	0.345934	0.920038	0.184008							0.863678	-0.45304	-0.220941	0.812729	-0.569845	-0.121442	0.434148	0.877667	-0.203019
-0.471728	0.877772	-0.0835974	-0.0574064	0.975909	-0.21049							0.55678	-0.815285	-0.15908	0.660324	-0.697451	-0.27845	0.0893752	-0.704277	-0.704277
-0.943613	0.205133	-0.259836	0.308053	-0.800938	-0.513422							0.37677	0.904249	0.200944	-0.42162	0.886857	-0.189002	0.10479	-0.981219	-0.161949
0.883284	-0.345033	-0.31743	0.950907	-0.148193	0.271688							-0.803379	0.133897	0.580218	0.610572	0.769851	-0.185826	-0.00422054	-0.983385	0.181483
0.0770894	0.985031	-0.154179	0.374373	0.924922	-0.0660658							-0.152411	0.965272	0.212181	0.0463526	0.981832	-0.184006	0.667716	-0.651127	-0.360816
-0.624695	0.624695	0.468521	0.853057	0.208063	-0.478544							-0.637078	-0.736042	0.228853	0.100951	0.862676	-0.49558	0.619042	-0.659635	-0.426226
-0.82172	-0.250089	0.512086	0.462372	0.838182	-0.289247							0.653425	-0.727398	-0.209589	-0.310825	0.651729	-0.691836	0.700989	0.682043	0.208402
0.931611	0.0850355	-0.35337	0.514259	0.835672	-0.192847							0.453434	-0.889822	-0.0511392	-0.45819	0.88861	0.0208268	0.595216	0.789008	0.152265
0.333605	0.927839	-0.166802	0.912964	-0.0172257	-0.407676							0.464483	0.877356	0.120421	-0.469966	0.881186	0.0514025	0.160296	0.984675	0.0686983
0.782552	-0.621754	-0.0321597	0.013331	0.999822	-0.013331							0.773582	0.623637	-0.112459	-0.470762	0.880121	0.0614038	0.190645	-0.940078	-0.282681
0.795463	0.544423	-0.266162	-0.601823	-0.524994	0.601823							0.216258	0.974823	0.0543417	0.835067	0.173972	-0.521917	-0.714339	0.69914	0.0303974
0.762075	0.59397	-0.257761	0.337764	0.938233	-0.0750587							-0.622409	0.311204	0.718164	0.676431	-0.579798	-0.454175	-0.635705	0.492159	0.594692
0.679774	-0.59271	-0.431975	0.606541	0.711117	0.355558							0.0107971	0.906956	0.421087	0.595605	0.798364	0.0887071	0.38151	-0.859911	-0.33912
0.692401	0.669512	-0.268949	0.233144	0.964577	0.123429							0.726676	0.224187	-0.64937	0.807294	0.341547	-0.481271	-0.476164	-0.82006	-0.317443
-0.869712	-0.34359	0.354327	0.799002	-0.0499376	-0.599251							-0.910182	-0.390078	0.139314	0.523311	-0.818269	-0.237869
0.704477	-0.694341	-0.146977	-0.431834	0.669342	-0.604567							0.778376	0.28607	-0.558834	0.817889	0.525786	0.233682
0.571664	-0.408332	-0.711664	-0.315906	-0.947717	0.0451294							-0.947652	-0.315884	0.0466059	-0.722897	0.562254	0.40161
0.752192	0.658655	-0.0194868	-0.812561	0.469427	-0.345517							-0.943644	-0.290744	0.158124	0.15891	0.985245	0.0635642
0.69657	0.711713	-0.090857	-0.380574	-0.90915	0.169144							0.57735	-0.57735	0.57735	0.0869657	0.985611	0.144943
0.647465	0.639164	-0.415041	-0.791466	0.611132	0.0100186							0.891485	-0.40522	-0.20261	0.0258717	0.983124	0.181102
0.463794	-0.772991	0.432875	-0.825348	-0.346646	-0.445688							0.973443	-0.139063	-0.181852	0.0662324	0.993486	0.0927254
0.267885	0.721228	-0.638802	0.0378709	-0.984644	0.170419							0.799083	-0.535855	0.272628	0.206963	0.937422	0.280009
0.645772	0.691898	0.322886	0.593389	0.487637	0.64039							0.49334	-0.856256	-0.153105	0.0805823	0.966988	0.241747
-0.163846	-0.655386	0.737309	-0.210851	0.869116	0.447415							0.518919	0.845646	-0.124925	0.0709027	0.982508	0.172192
-0.494685	0.714545	-0.494685	0.90878	0.413082	-0.0590117							0.970241	-0.171219	-0.171219	0.0490618	0.768635	-0.637803
-0.138343	0.899229	-0.415029	-0.0257428	0.978225	0.205942							0.785375	-0.575942	0.226886	0.00866134	-0.90944	0.415744
-0.25985	0.883489	-0.389775	0.769978	-0.486626	-0.412708							0.503491	-0.846779	-0.171644	-0.24285	-0.968897	-0.0475686
-0.52607	-0.839206	0.13778	0.893453	0.440435	-0.0880869							0.628394	0.762095	-0.155984	-0.272166	-0.952579	-0.136083
-0.195836	-0.267049	-0.943574	-0.0236542	-0.898858	-0.437602							-0.915699	-0.356822	0.184859	-0.61978	0.732467	0.281718
-0.381295	0.83386	-0.399113	-0.704749	-0.704749	0.0816025							0.505496	-0.0297351	-0.862316	-0.575613	0.630433	0.520792
0.717092	0.685221	-0.127483	-0.347172	-0.935856	0.0603778							-0.314802	0.934251	0.167556	-0.553346	0.495099	0.66984
0.525047	0.728291	-0.440362	0.304025	-0.95261	0.0101342							-0.746914	-0.410803	-0.52284	0.0178543	-0.999841	2.24658e-15
0.619877	0.782673	0.0563525	-0.876501	0.188495	-0.442963							-0.914396	-0.332508	0.230908	-0.150541	-0.675505	-0.721825
-0.450835	0.631169	-0.631169	-0.953755	0.224132	-0.200289							-0.135677	0.989937	0.0402005	0.02653	-0.999296	0.02653
0.789115	0.591836	-0.164399	-0.903738	-5.3991e-15	-0.428086							0.57735	-0.57735	0.57735	-0.186074	-0.620247	-0.762017
-0.616005	-0.787678	0.0100984	-0.706224	0.681444	0.192043							0.876642	-0.448061	-0.175328	0.487542	-0.761785	0.426599
0.0734578	0.873331	0.481556	-0.68213	-0.730337	-0.0361553							-0.706706	0.0336527	-0.706706	-0.563462	-0.665909	0.488954
0.669155	-0.736852	-0.0963375	-0.166105	0.894409	-0.415261							-0.666446	-0.697444	-0.263479	-0.536715	-0.786565	0.305372
0.502427	-0.837378	0.215326	0.323863	0.934221	-0.149475							-0.0939133	0.995481	-0.014087	-0.14786	0.842804	-0.517511
0.481432	0.683432	-0.548766	-0.673253	0.665286	0.322684							-0.637905	-0.762375	-0.108911	-0.595757	-0.658469	-0.459883
-0.0107465	-0.934944	-0.354634	-0.324801	0.944536	-0.0485335							-0.110417	0.993749	0.016445	-0.188069	0.879677	0.436805
-0.70573	0.322834	0.630653	0.466698	-0.762428	0.448215							-0.626916	-0.723364	-0.289346
-0.675813	-0.579672	-0.455255	-0.00568742	0.949799	-0.312808							-0.13929	0.990223	0.00759762
0.687035	-0.707242	-0.166707	-0.361095	-0.930349	-0.0637226							-0.286509	0.946937	0.145683
-0.316041	0.948123	-0.0343523	0.460559	0.878275	-0.128528							-0.090065	0.995333	0.0346404
-0.972294	-0.0529821	-0.22768	0.238349	0.941477	-0.238349							-0.111937	0.993442	0.0233202
-0.974088	-0.159925	-0.159925	-0.58238	0.811514	0.0477361							-0.114618	0.992544	0.0414576
-0.792935	0.606008	-0.0633142	0.291404	0.936975	-0.192775							-0.929217	-0.323032	0.179462
-0.561282	-0.826799	-0.0369707	0.842517	-0.530474	-0.093613							-0.959415	-0.278272	0.0456864
-0.62343	0.756479	-0.197673	0.645299	0.672186	-0.362981							0.142196	-0.900574	-0.410788
-0.830348	0.552753	0.0706161	-0.732798	-0.635092	0.244266							0.024148	-0.643948	-0.764688
-0.407088	0.913383	-0.00342091	0.650344	-0.740565	-0.169165							0.452036	0.891158	-0.038746
-0.270055	-0.108022	0.956766	-0.276306	0.507632	-0.816067							-0.177268	0.372874	-0.910791
0.491219	0.849456	-0.192688	0.358057	0.930949	-0.0716115							-0.63147	-0.74987	-0.197334
0.449774	-0.887054	-0.104114	-0.291569	0.955964	-0.0334588							-0.604375	-0.782716	-0.148617
0.989785	-0.140749	0.0227015	-0.364247	0.930854	0.0289085							-0.351702	-0.867532	-0.351702
-0.235796	-0.959445	-0.154487	-0.229045	-0.937003	-0.263749							0.606788	-0.046676	-0.793492
0.669173	0.732302	-0.126259	0.523338	-0.753607	-0.397737							-0.355643	-0.844653	-0.400099
0.640257	0.753244	-0.150649	0.426717	-0.887378	-0.174566							0.690085	0.11898	-0.713881
0.237649	-0.155701	-0.958791	0.0561196	0.931585	0.359165							-0.351702	-0.867532	-0.351702
-0.277372	0.957382	0.0805274	-0.334746	-0.891083	-0.306457							0.453001	-0.014613	-0.89139
0.734517	0.538646	0.412729	0.315704	0.937246	0.147986							-0.307198	-0.94421	-0.118733
-0.10798	-0.947826	-0.299945	-0.317776	-0.939513	0.127801							-0.290102	-0.954801	-0.06478
-0.688247	0.688247	0.229416	-0.945269	0.321586	-0.0552219							-0.219779	-0.96248	-0.15915
0.772487	-0.627646	-0.0965609	0.231655	-0.912578	-0.336952							0.460293	-0.571347	-0.67948
-0.796405	0.579783	0.172023	0.433051	0.892012	-0.129545							0.473743	-0.543071	-0.693283
0.44964	-0.14988	-0.880545	0.548436	0.835536	-0.033127							-0.683714	0.711062	0.164091
0.857944	0.507252	0.0814108	0.0312073	-0.962224	-0.270463							0.574705	0.507093	-0.642317
0.3281	0.936286	-0.125372	0.350756	-0.929503	0.113996
-0.752079	0.558474	-0.349977	-0.214146	0.937812	-0.273221
0.496149	-0.810781	-0.310598	-0.0596277	-0.942117	-0.32994
0.775107	-0.62867	-0.0631194	0.884941	0.448217	-0.12642
0.0947618	-0.994999	-0.0315873	-0.408269	0.868289	0.281763
-0.611974	0.287253	0.736867	-0.310527	-0.931582	0.189017
0.239623	-0.967863	-0.0763045	0.63375	0.271607	-0.724286
0.126613	0.894459	0.42885	-0.399901	0.790713	0.463521
-0.142049	-0.976017	-0.164961	0.860816	-0.133905	-0.490984
0.383516	0.826034	0.413017	0.175565	-0.981866	0.0715267
0.799083	-0.592261	-0.103411	0.683656	0.674834	-0.277873
-0.505963	-0.861262	-0.0472232	0.902358	0.0451179	0.42862
-0.686485	0.727142	-0.00156375	-0.563695	-0.48504	0.668569
-0.356623	0.791981	0.495567	0.151916	0.952926	-0.2624
0.327823	-0.941619	-0.0767245
0.82277	0.255584	-0.507667
0.804283	0.549546	-0.226115
-0.516838	0.752589	0.40803
-0.072691	-0.99108	-0.111696
-0.532269	-0.84656	-0.00506922
0.177774	-0.967881	-0.177774
0.784934	0.617278	-0.053345
