# Supplementary material for: 3D directional tuning in the orofacial sensorimotor cortex during natural feeding and drinking
Source: eLife. 2025 Oct 21;13:RP101325. doi: 10.7554/eLife.101325 (PMC12539803; doi:10.7554/eLife.101325)
Supplement: Figure 5—source data 2. [file elife-101325-fig5-data2.xlsx]

## Sheet: Sheet1
Figure 5 - Source Data 2
Figure 5B: Distribution of directional index
Monkey R			Monkey Y					Summary Statistics
MIo	SIo		MIo	SIo					MIo	SIo
0.314451	0.750558		0.306677	1.87799				mean	0.533414	0.603993
0.851651	0.167099		0.579871	0.252662				std	0.349497	0.471157
0.383616	1.61245		1.08078	0.328273
0.95695	0.607569		0.49705	0.187691				t-test
0.416179	0.59565		0.942548	0.885845				p-value	0.313878
0.151935	0.660835		1.09573	0.221292
0.618122	0.663127		0.701415	0.784219
1.23879	0.62111		0.61864	0.794546
0.216957	0.673318		0.630923	0.794138
0.279518	2.14286		0.498738	0.197786
0.142906	0.652641		0.915456	0.251047
0.920032	0.636615		1.11868	0.857228
0.572313			0.691738	0.777616
0.244568			0.110538	0.356509
0.217194			0.481756	0.15421
0.162591			1.32532	0.235449
0.33739			0.428332	0.213828
0.293863			0.931782	0.311893
1.09251			0.648	0.170147
0.110962			0.704338	0.41318
0.271692			0.650569	0.391659
0.401472			0.961757	0.294716
0.669046			0.683594
0.862361			0.15844
0.174692			0.311644
0.499893			0.470702
0.499669			0.551397
0.107409			0.498419
0.169583			0.508671
0.809129			0.524235
0.679147			0.650436
0.389004			1.07867
0.55082			0.694007
0.163608			0.879025
1.45774			0.547195
0.573064			1.12089
0.686457			0.744556
0.617235			0.864736
0.320021			0.568191
0.436987			0.602435
0.403292			0.251912
0.411738			1.60775
0.254698			0.241816
0.223881			0.517271
0.348648			1.07905
0.285788			0.652377
0.0727731			0.192432
0.498802			0.260098
0.451317			1.08634
0.397033			0.239796
0.237147			1.08726
0.186043			0.348228
0.227441			1.13198
0.591337			1.61342
0.97244			1.08052
0.770806			1.09587
0.36531			1.14255
0.602116			0.536295
0.224866			0.686359
0.275866			0.775913
0.484538			0.548357
0.0930279			0.626851
0.841895			0.194308
1.1487			1.6882
0.196777			0.236045
0.837729			0.518372
0.222756			0.454
0.722876			0.82772
0.238846			0.138444
0.085566			0.764698
0.107805			0.136097
0.418187			0.777342
0.240912			0.106242
0.214586			0.384111
0.152823			0.349695
0.147256
0.0578424
0.752692
0.0554886
0.0944174
0.667218
0.11748
0.362937
0.396322
0.197989
0.577997
0.108504
0.51982
0.196913
0.782231
0.219464
0.448068
0.27534
0.117974
0.158909
