# Supplementary material for: 3D directional tuning in the orofacial sensorimotor cortex during natural feeding and drinking
Source: eLife. 2025 Oct 21;13:RP101325. doi: 10.7554/eLife.101325 (PMC12539803; doi:10.7554/eLife.101325)
Supplement: Figure 6—source data 1. [file elife-101325-fig6-data1.xlsx]

## Sheet: Sheet1
Figure 6 - Source Data 1
Figure 6A: Distribution of PDs during control feeding
Summary Statistics
	Monkey R			Monkey Y
	MIo	SIo		MIo	SIo
mean	-0.0825	0.1903		-0.122	-0.0339
median	-0.0873	0.0873		-0.2618	-0.0873
var	0.0436	0.0465		0.0465	0.0333
std	0.2953	0.3051		0.3049	0.2582
std0	0.2986	0.3087		0.3085	0.2604
skewness	-0.0173	0.0184		-0.0141	-0.0101
skewness0	13.1757	-28.7255		18.4495	8.0581
kurtosis	0.8339	0.8221		0.8222	0.8717
kurtosis0	-1.5091	-1.9982		-2.0429	-1.3372
k-test	f	p-value		f	p-value
	1.13938	0.665116		1.33903	0.481862
Source data
Monkey R			Monkey Y			*bin numbers corresponding to ranges of degrees
MIo	SIo		MIo	SIo		1	-30:-20
6	2		3	3		2	-20:-10
3	3		3	4		3	-10:0
3	4		1	4		4	0:10
6	3		1	1		5	10:20
3	3		4	6		6	20:30
3	6		4	2
2	6		1	6
2	6		1	5
3	6		6	2
6	6		4	2
4	6		6	3
4	6		1	2
2	6		2	2
6	1		6	4
3			1	3
4			2	6
2			2	5
2			5	3
3			6	3
1			4
6			6
6			4
6			4
2			1
4			2
2			1
2			2
1			4
1			6
1			4
1			1
1			4
2			1
2			1
3			1
3			1
2			1
2			1
2			1
2			1
2			4
1			1
2			1
1			1
1			4
6			4
1			2
3			2
4			4
2			1
1			6
2			5
3			2
2			1
3			1
4			3
2			2
4			3
6			2
6			3
6			2
2			5
2			5
1			2
2			6
3			2
2			1
6			6
1			3
6			2
2			2
2			4
2			1
5			1
2			5
2			5
2
5
2
2
2
4
6
3
1
2
4
3
1
2
6
6
3
6
6
6
6
1
1
3
4
3
4
5
6
2
2
1
3
2
2
2
