# Supplementary material for: 3D directional tuning in the orofacial sensorimotor cortex during natural feeding and drinking
Source: eLife. 2025 Oct 21;13:RP101325. doi: 10.7554/eLife.101325 (PMC12539803; doi:10.7554/eLife.101325)
Supplement: Figure 6—source data 2. [file elife-101325-fig6-data2.xlsx]

## Sheet: Sheet1
Figure 6 - Source Data 2
Figure 6B: Distribution of PDs during control drinking
Statistics
MIo vs. SIo
	chi-stat	p-value
Monkey R	33.5746	5.1212e-08
Monkey Y	4.7183	0.0945
Source data
MIo Monkey R				SIo Monkey R
	proportion	ste			proportion	ste
Left	0.367	0.032795		Left	0.03448	0.023958
Middle	0.18	0.02614		Middle	0.5	0.06565
Right	0.45	0.03385		Right	0.448	0.065297
MIo Monkey Y				SIo Monkey Y
	proportion	ste			proportion	ste
Left	0.608696	0.58753		Left	0.41176	0.0844
Middle	0.101449	0.036347		Middle	0.20588	0.069344
Right	0.289855	0.0379337		Right	0.3529	0.08195
Monkey R			Monkey Y				*numbers corresponding to directions
MIo	SIo		MIo	SIo			1	Left
2	2		3	2			2	Middle
2	2		2	1			3	Right
1	3		3	2
3	2		3	1
1	1		1	1
1	3		1	3
1	1		1	1
1	2		3	1
3	2		3	2
3	3		1	3
3	2		1	1
1	2		1	3
3	3		1	2
2	2		1	2
1	2		1	2
1	2		1	1
3	2		1	3
1	3		3	3
1	3		1	1
1	2		1	3
1	3		1	3
3	2		1	3
3	2		1	1
2	3		1	3
3	2		1	2
2	2		1	1
1	2		3	3
3	3		3	1
1	3		2	1
1	2		1	3
2	2		1	3
2	2		2	1
1	3		1	2
2	2		1	1
1	2		1
1	3		1
1	3		3
1	3		1
3	3		3
2	2		1
3	3		3
3	2		2
3	2		1
2	3		3
1	3		3
2	3		2
2	3		3
3	3		3
1	3		1
1	3		2
3	3		3
1	3		3
3	2		1
2	2		1
3	2		1
3	2		1
3	3		1
3	3		1
1			1
3			3
2			3
3			1
1			1
2			1
2			1
1			1
3			1
3			2
1			3
1
3
1
3
2
2
3
1
1
3
2
1
3
1
1
3
1
1
1
1
1
3
3
1
2
3
1
2
1
2
2
3
3
3
3
1
3
2
3
2
3
1
1
2
3
2
3
1
2
3
1
1
1
3
3
1
1
3
3
3
3
1
1
2
3
1
1
3
1
1
3
3
2
3
2
3
1
3
3
1
3
3
1
1
3
1
1
1
1
1
3
2
3
3
2
3
