# Supplementary material for: 3D directional tuning in the orofacial sensorimotor cortex during natural feeding and drinking
Source: eLife. 2025 Oct 21;13:RP101325. doi: 10.7554/eLife.101325 (PMC12539803; doi:10.7554/eLife.101325)
Supplement: Figure 7—figure supplement 1—source data 1. [file elife-101325-fig7-figsupp1-data1.xlsx]

## Sheet: Sheet1
Figure 7 - figure supplement 1 - Source Data 1
Cumulative explained variance for feeding and drinking with equal neurons
Source Data
Monkey R				Monkey Y
Feeding MIo	Feeding SIo	Drinking MIo	Drinking SIo	Feeding MIo	Feeding SIo	Drinking MIo	Drinking SIo
0.392593	0.455986	0.314152	0.442351	0.475372	0.36378	0.550735	0.3994
0.64882	0.691189	0.568071	0.590981	0.741402	0.62739	0.667211	0.671217
0.836292	0.808437	0.766554	0.679109	0.882667	0.74737	0.767733	0.785022
0.889722	0.877261	0.817683	0.763172	0.921673	0.839924	0.842814	0.832507
0.91353	0.918408	0.859625	0.811743	0.944066	0.890452	0.88112	0.867011
0.930297	0.953146	0.901468	0.843577	0.959044	0.916767	0.909121	0.896213
0.944495	0.967673	0.927565	0.869901	0.968871	0.939802	0.933788	0.918452
0.95665	0.975737	0.943271	0.89435	0.977739	0.959809	0.946776	0.935295
0.965266	0.982463	0.95716	0.912812	0.983354	0.969497	0.957873	0.948445
0.97117	0.98773	0.968261	0.928998	0.987639	0.977275	0.967671	0.960224
0.976572	0.992176	0.974121	0.941618	0.990483	0.982467	0.974662	0.969683
0.981417	0.994723	0.9785	0.95239	0.992505	0.986753	0.979994	0.975893
0.984923	0.996383	0.982685	0.961598	0.99408	0.990764	0.984057	0.981298
0.988048	0.997708	0.986413	0.970115	0.995285	0.993141	0.987982	0.985786
0.990887	0.998774	0.989769	0.977248	0.996452	0.995224	0.991031	0.989515
0.993455	0.999306	0.992437	0.983528	0.997408	0.996669	0.993831	0.992719
0.995583	0.999725	0.994818	0.989203	0.998298	0.997808	0.996197	0.995309
0.997319	1	0.996805	0.993285	0.998969	0.998746	0.998201	0.99737
0.998768	1	0.998443	0.996886	0.999544	0.999427	0.999305	0.998757
1	1	1	1	1	1	1	1
