# Supplementary material for: 3D directional tuning in the orofacial sensorimotor cortex during natural feeding and drinking
Source: eLife. 2025 Oct 21;13:RP101325. doi: 10.7554/eLife.101325 (PMC12539803; doi:10.7554/eLife.101325)
Supplement: Figure 7—figure supplement 2—source data 1. [file elife-101325-fig7-figsupp2-data1.xlsx]

## Sheet: Sheet1
Figure 7 - figure supplement 2 - Source Data 1
Comparison between stable MIo neural population trajectories
Source Data
200 ms around min gape
Feeding																					Drinking
Factor 1	Factor 2	Factor 3	Factor 4	Factor 5	Factor 6	Factor 7	Factor 8	Factor 9	Factor 10	Factor 11	Factor 12	Factor 13	Factor 14	Factor 15	Factor 16	Factor 17	Factor 18	Factor 19	Factor 20		Factor 1	Factor 2	Factor 3	Factor 4	Factor 5	Factor 6	Factor 7	Factor 8	Factor 9	Factor 10	Factor 11	Factor 12	Factor 13	Factor 14	Factor 15	Factor 16	Factor 17	Factor 18	Factor 19	Factor 20
-0.298398	-0.289728	-0.279065	-0.269602	-0.261727	-0.266409	-0.2707	-0.265505	-0.270676	-0.278061	-0.276611	-0.284213	-0.308346	-0.332489	-0.35749	-0.384815	-0.410062	-0.425846	-0.441176	-0.461506		0.350255	0.353113	0.347019	0.340888	0.34029	0.339569	0.339815	0.346992	0.357021	0.353794	0.339548	0.327578	0.322863	0.315493	0.299014	0.281904	0.273053	0.266781	0.263963	0.273471
-0.234764	-0.225891	-0.208731	-0.194861	-0.17365	-0.130977	-0.0756343	-0.0124635	0.0451851	0.0811582	0.0925563	0.0858818	0.080145	0.086374	0.0984502	0.109495	0.114049	0.105616	0.0957031	0.094321		0.0415995	0.0342046	0.0355997	0.0338301	0.0159427	-0.00259272	-0.0143753	-0.0268858	-0.0300488	-0.0268718	-0.0226229	-0.0126216	-0.00614463	-0.00724029	-0.005213	0.00591213	0.0177513	0.029803	0.0492817	0.058729
-0.106167	-0.0773425	-0.0434107	0.00277018	0.0555682	0.0945296	0.118009	0.134011	0.139015	0.132849	0.118663	0.0901989	0.0538873	0.0229392	-0.0171252	-0.0673529	-0.107814	-0.130179	-0.146421	-0.162193		-0.0936722	-0.0885903	-0.0783503	-0.0755822	-0.0810216	-0.0760363	-0.061419	-0.0489641	-0.0279542	-0.0105126	-0.00927369	-0.00454489	0.0148093	0.0357772	0.0530056	0.0748693	0.0979259	0.10432	0.0910719	0.0797073
0.0374614	0.0263826	0.0130732	-0.000848923	-0.0121551	-0.0130312	-0.0144055	-0.0245568	-0.0382965	-0.0508733	-0.0597496	-0.060319	-0.0517811	-0.0357396	-0.0131347	0.00628595	0.0237458	0.0425635	0.056251	0.063377		-0.0238509	-0.0263443	-0.0266226	-0.0300552	-0.040055	-0.0483976	-0.0504566	-0.0490954	-0.0406432	-0.0318683	-0.0287185	-0.0209621	-0.0015486	0.0146051	0.0318289	0.0602705	0.0877595	0.106155	0.112207	0.111544
-0.0203111	-0.0164393	-0.0118771	-0.0046131	0.0019794	0.00668323	0.00435505	-0.00445296	-0.00765884	-0.0108623	-0.0187661	-0.0174029	-0.00506553	0.00162852	0.00215262	0.00865016	0.0142938	0.0165017	0.0191384	0.0229554		-0.0349024	-0.03566	-0.0301434	-0.0257252	-0.0201861	-0.0165006	-0.0171815	-0.0138587	0.00650066	0.0321947	0.0456188	0.053097	0.0564333	0.0513537	0.0427511	0.0351105	0.0215067	-0.00836465	-0.0467534	-0.0761797
0.00103713	-0.00168878	-0.00415392	-0.00487118	-0.0067152	-0.00618867	-0.00358259	-0.00561947	-0.0100418	-0.0126258	-0.00869786	0.00213814	0.0123011	0.0178108	0.016114	0.00470871	-0.00438926	-0.00213466	0.00373503	0.00615572		-0.033718	-0.0397434	-0.0345441	-0.0200747	-0.00626596	0.00784228	0.0217667	0.0377842	0.0422282	0.0325478	0.0221074	0.00194079	-0.0188724	-0.0189177	-0.0105036	-0.00803369	-0.00848207	-0.00141718	0.0136421	0.0274219
-0.0270399	-0.0186873	-0.00982155	0.00327369	0.0173986	0.0256252	0.0264387	0.0185141	0.00577469	-0.00639839	-0.0142912	-0.0178231	-0.0188845	-0.0138972	-0.00460174	0.000678285	-0.000683631	0.00269867	0.0120351	0.0179043		-0.00199269	0.000988088	0.00350404	0.00616985	0.00483749	0.00556692	0.0121796	0.0140904	0.00706606	-0.00376884	-0.01099	-0.0134613	-0.0126201	-0.00420098	0.00279313	0.00234052	-0.000942744	-0.00559748	-0.00327094	-0.00090375
-0.00404965	0.00282886	0.00576247	0.00436423	0.000726142	-0.00372396	-0.00773976	-0.00942051	-0.00668408	-0.00103488	0.00287894	0.00500585	0.006799	0.00656431	0.00331953	0.00128111	0.000247778	-0.00117615	-0.00319028	-0.00378693		-0.0107682	-0.00449521	-0.000999668	0.00135846	0.00496928	0.00798487	0.0102756	0.00892166	0.00201098	-0.0125631	-0.0204185	-0.0144899	-0.00308741	0.00694653	0.0157115	0.0175936	0.00609952	-0.00447092	-0.00473962	-0.00481139
-0.00218297	-0.00103645	-0.000645017	-0.000167902	0.00303269	0.00397449	0.00213059	-0.000591527	-0.0033313	-0.00491065	-0.0039968	0.000182016	0.00366052	0.00441201	0.00367879	0.00261606	0.00199319	-3.25812e-05	-0.00252281	-0.00499519		0.0126684	0.00891469	-0.00136436	-0.00656931	-0.00409776	-0.00405488	-0.00421719	-0.00110873	0.00298063	0.00524638	0.00404515	-0.00248104	-0.00994868	-0.0091086	0.00125449	0.00808636	0.00596895	-0.000832176	-0.00546346	-0.00118605
-0.00332545	1.03907e-05	0.0024731	0.00328776	0.000869499	-0.00200146	-0.0019138	-0.000690821	0.00050294	0.00169982	0.000742631	-0.000202106	0.000453621	0.000220001	-0.00207928	-0.00181224	-0.00044505	6.79579e-05	0.000141555	0.00185609		0.0049672	0.00266312	-0.00140913	-0.00628859	-0.00695412	-0.00356954	0.00191318	0.00465633	0.0030502	-0.000627705	-0.00322594	-0.00149164	0.00449435	0.00805209	0.00279656	-0.00535429	-0.00813852	-0.00243072	0.00393059	0.00311139
0.000692754	0.00111341	0.0013959	-0.00149832	-0.00380154	-0.00150502	0.00172131	0.00221987	0.000872677	0.000496806	0.00227446	0.0027514	-0.000562134	-0.00405371	-0.00406532	-0.0023171	-0.000994611	0.000292254	0.00179275	0.00307956		0.000431697	0.00131326	-0.0016586	-0.00190149	0.00194173	0.000854722	-0.00184705	0.000254376	0.000826158	-0.000708542	-0.000143361	0.000818929	-0.000606548	-0.00133221	0.00200213	0.00378833	-0.000133088	-0.00410149	-0.00223654	0.0025322
-0.00293812	-0.0013927	0.00109739	0.0024118	0.00235083	0.00145475	-0.000599218	-0.00331415	-0.00327449	0.0005265	0.0031415	0.00217936	0.000170891	-0.00149735	-0.00234348	-0.00122314	0.000899759	0.00128669	0.000741506	0.000268797		0.00143999	-0.000693402	-0.00249331	-0.00150442	0.00124426	0.00201169	-0.000150603	-0.000974786	0.000580837	0.00087014	0.000500901	0.000503109	-0.000284217	-0.00110568	-0.00148817	-0.000445757	0.00134327	0.000479227	-0.000305145	0.000524947
1.46647e-30	6.27412e-31	4.01703e-31	-1.13483e-31	-2.79899e-31	4.31935e-31	8.43391e-31	7.2415e-31	-3.06004e-32	-6.05989e-31	-3.07057e-31	4.25686e-31	5.87783e-31	2.58494e-31	2.475e-31	8.74625e-31	1.43781e-30	1.40987e-30	1.0693e-30	8.3241e-31		6.46993e-31	1.34572e-31	-1.14129e-30	-1.28702e-30	-1.03635e-32	-4.80609e-32	-8.49075e-31	-6.76305e-31	-8.46385e-31	-6.02913e-31	3.76484e-31	8.30174e-31	-6.13827e-32	-1.60058e-30	-1.73826e-30	-9.15092e-31	-9.7391e-31	-1.47521e-30	-7.86518e-31	5.60269e-31
-2.53349e-31	1.26802e-31	4.59055e-31	3.59976e-31	6.29579e-31	6.18862e-31	3.76415e-31	3.77677e-31	3.3721e-32	-2.77568e-31	-2.51207e-31	2.52408e-31	7.31407e-31	9.44893e-31	5.37188e-31	2.65144e-31	4.5998e-31	4.03827e-31	-2.48909e-31	-8.678e-31		-7.96231e-32	3.46325e-31	-4.62849e-31	-8.47878e-31	-5.32366e-32	-1.00484e-31	-6.65452e-31	-6.19728e-31	-4.18317e-31	-4.41956e-31	-5.39411e-31	6.05122e-33	4.215e-31	4.4816e-32	-1.57512e-31	-1.04468e-31	-4.3121e-31	-7.59086e-31	-4.09581e-31	6.26252e-31
1.88773e-31	-2.20814e-31	-4.57963e-31	-3.16369e-31	-2.67243e-31	-2.82682e-31	-2.14703e-31	1.67296e-31	5.37227e-31	3.05954e-31	4.40258e-32	1.21846e-32	-9.56953e-32	-2.36617e-31	-9.89916e-32	5.27609e-32	-1.45185e-31	-2.02556e-31	-3.63896e-32	1.09463e-31		2.43831e-31	2.87713e-32	3.46356e-31	4.02429e-31	-2.01918e-31	-3.78265e-31	7.74979e-32	3.76556e-31	9.1389e-32	-4.58244e-32	1.18771e-31	-1.40301e-33	-1.82678e-31	-1.04495e-31	9.33707e-32	4.22225e-32	-1.56322e-32	2.25247e-31	2.6818e-31	-1.70474e-31
-2.14385e-31	-6.95968e-32	-1.44106e-31	-4.89433e-31	-6.28332e-31	-3.88581e-31	-5.8117e-32	1.65676e-31	3.44494e-33	-3.24291e-31	-4.23408e-31	-3.14484e-31	-2.11105e-31	-2.45758e-31	-3.43241e-31	-4.83787e-31	-5.19757e-31	-3.53905e-31	-3.07877e-31	-2.99488e-31		1.77756e-31	4.22628e-31	2.3216e-31	2.19112e-31	5.39364e-31	3.33262e-31	2.20601e-32	2.20245e-31	2.30247e-31	1.37645e-31	2.57598e-31	3.54725e-31	3.00705e-31	2.7351e-31	5.46386e-31	5.12782e-31	1.22585e-31	5.79884e-32	1.79465e-31	4.78715e-31
-1.26534e-31	-4.03091e-32	-9.9378e-32	-2.45556e-31	-2.70593e-31	-1.61778e-31	-2.88889e-34	7.99261e-32	9.62965e-34	-1.05926e-31	-1.2663e-31	-5.37334e-32	4.34779e-32	8.51261e-32	2.93223e-32	-8.35854e-32	-1.26341e-31	-8.93631e-32	-9.09039e-32	-1.01689e-31		9.86076e-32	1.78149e-31	6.82742e-32	3.87112e-32	1.768e-31	1.118e-31	-1.48297e-32	6.02816e-32	6.89483e-32	3.54371e-32	7.54965e-32	1.10934e-31	1.10934e-31	7.44372e-32	1.27111e-31	9.55261e-32	-5.54668e-32	-3.9289e-32	2.23408e-32	1.47141e-31
-1.54074e-32	1.38667e-32	6.16298e-33	7.70372e-34	2.98519e-33	3.12964e-32	5.46964e-32	7.28002e-32	1.00148e-31	1.30867e-31	1.23624e-31	9.49483e-32	1.15171e-31	1.46948e-31	1.27497e-31	9.05187e-32	8.62817e-32	7.74224e-32	5.81631e-32	4.62223e-32		-6.65409e-32	-9.37928e-32	-1.01593e-31	-8.93631e-32	-8.43557e-32	-8.7052e-32	-7.62668e-32	-6.08594e-32	-5.35409e-32	-7.20298e-32	-6.99113e-32	-6.65409e-32	-4.9689e-32	-5.66223e-32	-6.32668e-32	-5.64297e-32	-4.39112e-32	-3.15853e-32	-5.85483e-32	-7.54965e-32
8.3152e-32	6.75038e-32	5.33483e-32	3.95538e-32	2.50852e-32	1.66593e-32	6.45187e-33	1.97408e-32	1.05926e-32	-3.81334e-32	-6.27853e-32	-4.62223e-32	-2.81186e-32	-2.34963e-32	-2.92741e-32	-3.3126e-32	-3.6689e-32	-3.29274e-32	-3.3776e-32	-3.82297e-32		-1.46371e-32	7.22224e-33	3.46667e-33	-1.00148e-32	-1.4613e-32	-2.34482e-32	-1.86815e-32	-7.70372e-34	-6.35557e-33	-6.01853e-33	4.24908e-33	1.48297e-32	2.00297e-32	2.42667e-32	3.3126e-32	2.38815e-32	2.31112e-33	7.31853e-33	1.755e-32	2.0126e-32
3.85186e-34	-1.15556e-33	-2.88889e-33	-2.98519e-33	-2.88889e-33	-1.44445e-33	-2.31112e-33	1.82963e-33	2.47963e-33	-3.37038e-33	-6.93335e-33	-3.46667e-33	2.31112e-33	7.07779e-33	8.86379e-33	4.71853e-33	2.7926e-33	2.6963e-33	2.11852e-33	1.92593e-34		-1.1363e-32	-6.25927e-33	-2.02223e-33	6.74075e-34	2.88889e-34	-2.11852e-33	-5.77779e-34	1.25185e-33	1.44445e-33	1.03519e-33	1.68519e-33	1.73334e-33	1.44445e-34	-1.3963e-33	2.93704e-33	5.1639e-33	2.07037e-33	9.62965e-35	-1.15556e-33	-7.70372e-34
100 ms after min protusion
Feeding						Drinking
Factor 1	Factor 2	Factor 3	Factor 4	Factor 5		Factor 1	Factor 2	Factor 3	Factor 4	Factor 5
-0.88677	-0.787824	-0.687333	-0.563045	-0.493472		0.708755	0.688815	0.678382	0.686471	0.656021
0.235179	0.0936692	-0.0619081	-0.166896	-0.188738		-0.0877182	-0.0389386	0.0153339	0.0477187	0.152298
-0.0879475	-0.0447503	-0.0175733	0.0701384	0.111557		-0.200277	-0.117533	-0.0234099	0.118778	0.191016
0.0184687	-0.00713826	-0.0172983	-0.0113428	0.0172281		-0.0827275	0.0459744	0.0688603	0.0508728	-0.0828975
-0.0162336	0.0070158	0.0385557	0.0115786	-0.043494		0.00126908	-0.00362565	-0.0276261	0.0494651	-0.0169049
-0.0184591	0.0122519	0.0189065	-0.00247774	-0.0109066		-0.0291042	0.0498275	-0.0128083	-0.0260342	0.0188043
-0.0130368	0.00933954	0.0115292	0.00459337	-0.0126354		-0.00385206	-0.0150826	0.0302603	-0.0128571	0.00174158
-0.00238014	-0.000544118	0.0109557	-0.0140105	0.00588207		0.000556879	-0.00161026	-0.000153908	0.00136171	-5.75157e-05
-1.22275e-30	-2.06396e-31	-7.27864e-31	5.75253e-31	1.67444e-32		-2.11283e-31	9.67595e-32	4.70758e-31	3.08055e-31	9.07108e-31
1.07253e-32	8.09249e-31	9.26486e-32	1.29305e-31	3.02933e-31		-2.85541e-31	-1.61065e-31	-3.30536e-31	-3.55787e-32	-5.69137e-31
4.43461e-31	5.0799e-31	7.34092e-31	-1.84813e-31	-1.59022e-31		2.54703e-31	-1.31042e-31	1.28774e-31	-4.96818e-31	-1.07475e-30
-1.56957e-31	-9.19108e-32	-7.34535e-32	-4.5965e-32	4.2547e-32		-9.88567e-32	6.07485e-32	2.09856e-31	1.46613e-31	7.12241e-32
2.26682e-31	5.65087e-32	-5.07905e-32	1.72786e-33	-9.55768e-32		-1.54855e-31	-8.85675e-32	-9.81713e-32	5.06225e-32	1.42377e-31
1.42708e-31	-2.44564e-31	-7.8781e-32	-3.35654e-31	-1.92852e-31		1.07169e-31	9.78051e-32	-1.15381e-31	2.5205e-31	4.21208e-31
-3.52678e-32	-2.08252e-32	2.63635e-32	-1.39171e-32	-2.04667e-32		-4.52818e-32	-3.66885e-32	-6.39109e-32	5.4194e-32	1.41969e-31
4.5657e-32	-4.1653e-32	7.16033e-32	2.88147e-33	4.50267e-32		1.15025e-32	2.11274e-32	-9.42903e-33	-6.78838e-32	-6.59886e-32
5.23853e-32	5.4889e-32	4.62223e-32	4.23705e-32	2.29186e-32		-7.02964e-32	-2.61926e-32	-4.45853e-32	-2.58075e-32	-4.85334e-32
-1.15556e-32	-1.11704e-32	-2.11852e-32	-1.54074e-32	-1.61778e-32		2.1113e-32	3.62075e-32	2.31112e-32	8.08891e-33	-7.75187e-33
-1.02315e-33	-3.51181e-33	-4.71853e-33	-4.04445e-33	-1.92593e-34		-8.71483e-33	-6.12085e-33	-3.85186e-33	5.5852e-33	2.75408e-32
-3.31019e-35	2.06887e-35	-5.64237e-36	-3.07789e-35	-1.77547e-34		8.27548e-36	-1.80556e-35	2.1441e-35	3.61112e-35	1.98612e-34
