# Supplementary material for: 3D directional tuning in the orofacial sensorimotor cortex during natural feeding and drinking
Source: eLife. 2025 Oct 21;13:RP101325. doi: 10.7554/eLife.101325 (PMC12539803; doi:10.7554/eLife.101325)
Supplement: Figure 7—figure supplement 3—source data 1. [file elife-101325-fig7-figsupp3-data1.xlsx]

## Sheet: Sheet1
Figure 7 - figure supplement 3 - Source Data 1
Effect of subsampling on cumulative explained variance
Source Data
Equal trials per direction
Full sample	Sample 1	Sample 2	Sample 3	Sample 4	Sample 5	Sample 6	Sample 7	Sample 8	Sample 9	Sample 10
0.392593	0.33811	0.355195	0.36242	0.380421	0.354748	0.371798	0.380401	0.35759	0.378058	0.325419
0.64882	0.571785	0.606794	0.586579	0.579898	0.586467	0.60335	0.61595	0.597177	0.612589	0.56572
0.836292	0.759734	0.782224	0.750412	0.747214	0.775043	0.763809	0.785612	0.75388	0.763824	0.77015
0.889722	0.811055	0.829358	0.802201	0.813675	0.82189	0.815981	0.83049	0.807195	0.819784	0.825321
0.91353	0.848278	0.856799	0.840356	0.840924	0.85133	0.844469	0.85635	0.838251	0.84847	0.851507
0.930297	0.87244	0.879373	0.871565	0.864453	0.87487	0.869321	0.880119	0.864604	0.873988	0.876309
0.944495	0.893545	0.898063	0.892476	0.884995	0.894265	0.888983	0.900714	0.887129	0.89406	0.894973
0.95665	0.913574	0.915709	0.911007	0.902942	0.911871	0.907811	0.91578	0.902862	0.910487	0.913172
0.965266	0.926265	0.929377	0.923611	0.918516	0.925784	0.923844	0.929112	0.917251	0.92477	0.925818
0.97117	0.936818	0.940932	0.93491	0.932287	0.937629	0.935118	0.940452	0.929653	0.936764	0.937574
0.976572	0.946848	0.94959	0.945394	0.944258	0.948507	0.945465	0.950111	0.941264	0.94697	0.947178
0.981417	0.956236	0.958088	0.954963	0.954101	0.957406	0.954387	0.958353	0.950736	0.955378	0.955462
0.984923	0.964721	0.965289	0.962798	0.962487	0.964646	0.963149	0.966007	0.959962	0.963187	0.963103
0.988048	0.971527	0.971764	0.970341	0.970014	0.971658	0.970327	0.972535	0.96802	0.970766	0.969771
0.990887	0.978066	0.977761	0.976974	0.976634	0.977888	0.97708	0.978094	0.974884	0.977018	0.976138
0.993455	0.983923	0.9835	0.983305	0.982767	0.983624	0.983106	0.983368	0.981043	0.982878	0.982201
0.995583	0.988927	0.988102	0.988009	0.988287	0.988665	0.988497	0.988478	0.986618	0.988412	0.987487
0.997319	0.993249	0.992542	0.99253	0.99274	0.992955	0.99256	0.99279	0.991558	0.992765	0.992211
0.998768	0.996723	0.996579	0.996692	0.996646	0.996726	0.996352	0.996401	0.996105	0.996749	0.996246
1	1	1	1	1	1	1	1	1	1	1
Equal neurons
MIo	SIo	MIo (full)
0.541567	0.455986	0.392593
0.791429	0.691189	0.64882
0.89938	0.808437	0.836292
0.929409	0.877261	0.889722
0.954955	0.918408	0.91353
0.968727	0.953146	0.930297
0.976714	0.967673	0.944495
0.983434	0.975737	0.95665
0.987452	0.982463	0.965266
0.990153	0.98773	0.97117
0.99267	0.992176	0.976572
0.994607	0.994723	0.981417
0.996168	0.996383	0.984923
0.997506	0.997708	0.988048
0.998531	0.998774	0.990887
0.999163	0.999306	0.993455
0.999519	0.999725	0.995583
0.999705	1	0.997319
0.999882	1	0.998768
1	1	1
