# Supplementary material for: 3D directional tuning in the orofacial sensorimotor cortex during natural feeding and drinking
Source: eLife. 2025 Oct 21;13:RP101325. doi: 10.7554/eLife.101325 (PMC12539803; doi:10.7554/eLife.101325)
Supplement: Figure 7—source data 1. [file elife-101325-fig7-data1.xlsx]

## Sheet: Sheet1
Figure 7 - Source Data 1
Neural population trajectories
Summary Statistics
Inter-trajectory distances ≠ 0 (t-test)
	Monkey R					Monkey Y
	Feeding		Drinking			Feeding		Drinking
(all <0.001)	MIo	SIo	MIo	SIo		MIo	SIo	MIo	SIo
mean p-value	8.09668e-12	1.2916e-06	3.65561e-34	1.13015e-25		1.56344e-10	1.79041e-07	5.60892e-32	7.22882e-30
MIo vs. SIo (24 neurons)
	Monkey R					Monkey Y
	Feeding		Drinking			Feeding		Drinking
(± 1SD)	MIo	SIo	MIo	SIo		MIo	SIo	MIo	SIo
avg inter-traj dist	0.3869 ± 0.0182	0.1411 ± 0.0079	0.2955 ± 0.0469	0.1070 ± 0.0386		0.3454 ± 0.0226	0.1580 ± 0.0138	0.1818 ± 0.0362	0.2610 ± 0.0719
distnace travelled	0.4256 ± 0.0689	0.2595 ± 0.0869	2.8452 ± 0.4164	1.3552 ± 0.5211		0.3247 ± 0.1151	0.4072 ± 0.1675	2.9287 ± 0.1926	4.3538 ± 0.2776
t-test p-values	inter-traj (% < 0.01)	distance travelled	inter-traj (% < 0.01)	distance travelled		inter-traj (% < 0.01)	distance travelled	inter-traj (% < 0.01)	distance travelled
	1	-0.00083156	1	0.018		0.9643	0.2699	1	0.0019
normalized inter-traj	0.5214 ± 0.2055	0.4735 ± 0.1150	0.4939 ± 0.2243	0.3373 ± 0.1985		0.5134 ± 0.1434	0.5091 ± 0.1210	0.3492 ± 0.1656	0.3489 ± 0.1827		p = 0.00657591926730584
norm difference in distance travelled | rank test p-val
Feeding	0.1805 ± 0.1273	0.000437777		Drinking	0.2826 ± 0.1268	0.03125
Anterior-Posterior pairs vs. Others
	Monkey R			Monkey Y
(± 1SD)	MIo	SIo		MIo	SIo
ant-post dist	0.4768 ± 0.1219	0.0966 ± 0.0243		0.3512 ± 0.0992	0.1693 ± 0.0451
others dist	1.0160 ± 0.1666)	0.1485 ± 0.0407		0.7279 ± 0.1516	0.3239 ± 0.0861
t-test p-values	2.45494e-06	0.0251594		0.000186355	0.00286206
Source data (mean inter-trajectory distances over time)
Feeding		Drinking
MIo	SIo	MIo	SIo
0.392906	0.143041	0.275065	0.143079
0.347101	0.141039	0.138402	0.12693
0.308534	0.138325	0.147339	0.107668
0.37679	0.131931	0.234763	0.117576
0.516874	0.130852	0.337133	0.12438
0.627221	0.134744	0.370334	0.11051
0.679508	0.138919	0.458616	0.0931014
0.665245	0.147024	0.571363	0.102469
0.611327	0.150824	0.641678	0.115554
0.608917	0.154631	0.69991	0.117405
		0.675929	0.128221
		0.536907	0.140223
		0.404933	0.139671
		0.357475	0.137399
		0.36066	0.13742
		0.427487	0.133323
		0.610407	0.131468
		0.794939	0.142824
		0.721734	0.171965
		0.445082	0.204611
		0.375866	0.208937
		0.398373	0.189775
		0.46299	0.157402
		0.460113	0.132728
		0.366966	0.12026
		0.315822	0.100439
		0.378222	0.100963
		0.341491	0.0996743
		0.26594	0.0817594
		0.229594	0.0792052
		0.270132	0.0941834
		0.275795	0.0822996
		0.217193	0.0586752
		0.190199	0.0502591
		0.221955	0.0591888
		0.226573	0.0648502
		0.233346	0.055518
		0.30006	0.0603928
		0.336934	0.06115
		0.239942	0.058723
		0.13869	0.0669074
		0.158973	0.0829887
		0.175132	0.0813159
		0.293307	0.0770055
		0.360908	0.0737255
		0.281074	0.0730915
		0.209218	0.0758494
		0.139165	0.0869759
		0.131787	0.0955465
		0.255846	0.0932003
