# Supplementary material for: 3D directional tuning in the orofacial sensorimotor cortex during natural feeding and drinking
Source: eLife. 2025 Oct 21;13:RP101325. doi: 10.7554/eLife.101325 (PMC12539803; doi:10.7554/eLife.101325)
Supplement: Figure 8—source data 1. [file elife-101325-fig8-data1.xlsx]

## Sheet: Sheet1
Figure 8 - Source Data 1
Figure 8A: Distribution of directions during feeding
Summary Statistics
	Monkey R			Monkey Y
	Control	Nerve Block		Control	Nerve Block		Sham
mean	1.39954	-0.552918		-0.295668	-0.52778		0.151395
median	1.08713	-1.97348		-1.76011	-0.764715		-1.9323
std	14.8814	11.3962		10.528	10.9681		10.9988
	t-test	f-test		t-test	f-test		t-test
p-value	1.68832e-09	1.16095e-53		0.431189	0.0348536		0.0569702
Source Data
Monkey R			Monkey Y
Control	Nerve Block		Control	Nerve Block		Sham
-7.64533	-3.26923		9.22807	0.566432		17.5309
-15.3689	5.66985		14.2731	13.5808		14.5099
15.2229	4.29429		16.7822	-20.0796		19.9582
21.6033	0.628068		-19.4786	15.9024		13.5713
11.6534	4.99652		23.8234	1.72264		22.5158
-13.2011	11.5717		20.8704	-4.22399		16.7684
21.4685	-0.943868		-13.2502	-5.48152		-17.4633
23.4816	-11.1356		15.3062	-2.08653		22.4722
21.3604	-10.7097		21.7685	2.41779		-19.7447
17.5585	-7.68372		15.8928	-3.97437		-17.5124
18.5591	-3.34094		11.6858	-5.19239		-15.3085
23.9059	-0.474507		-16.3947	-5.62402		-19.1304
23.9834	-7.25975		18.2918	-7.41307		-13.6024
5.48597	-1.07253		21.2201	-10.5207		17.3106
10.1832	-1.25973		-15.5972	15.607		15.9405
-4.46573	-11.1773		-14.0051	16.7206		19.6593
13.619	6.16919		17.6338	12.6156		-15.2891
-18.0204	-5.21923		13.8035	14.9187		15.5023
30.0299	7.18585		15.1064	2.87424		15.3464
25.9462	-6.3923		-13.0721	-11.5116		18.7865
21.6218	-3.7028		11.4211	-10.9482		-13.1783
11.0808	-5.37773		14.5156	15.2338		14.758
29.8917	-9.03057		-10.4014	-2.18566		-9.65065
22.2563	-10.6397		-11.7678	-2.57401		9.7027
-29.6951	-8.56483		-10.551	-11.1422		-11.2841
-30.608	-12.5494		-8.05844	-22.9029		16.0328
23.5194	-21.0802		20.3868	6.87961		-16.0286
10.8632	15.3777		22.9236	8.01498		16.0234
5.49732	-12.6439		-20.1584	-8.15199		-15.0585
4.99331	-17.3751		-20.1767	5.81995		-19.7924
0.808103	-15.3943		14.6393	1.374		-5.80614
-3.29164	-12.4128		-18.4552	-12.2328		-4.68756
2.92467	-12.0351		19.7112	-3.54584		13.9231
-12.8604	1.31588		-22.2084	-4.96922		-21.9263
17.4168	-5.99237		-15.3003	-3.06229		16.5067
-20.3503	1.60332		23.5425	-4.21259		18.6258
20.4849	-5.6823		17.1728	-3.65708		18.9415
19.7196	-3.52358		-23.6416	-3.24209		18.8344
25.5863	-3.84155		-14.3701	-2.46298		-24.9474
21.6619	-4.92593		-24.566	3.5338		17.9856
10.5553	-2.83595		20.041	4.0048		-17.605
22.1407	11.7722		-17.6235	2.38636		-21.4652
21.3856	8.09161		17.1212	-4.39444		-16.3244
17.64	2.08187		17.4644	3.31411		-21.3499
24.3833	-3.6873		-15.4085	-4.90442		19.1642
15.8451	2.61196		-12.7231	3.69493		-8.86744
9.65322	5.93672		19.1864	-10.2065		19.9131
-3.62385	1.63275		-14.7391	-6.78264		10.965
-4.31373	15.5326		10.5492	-17.7613		13.2208
-7.78875	-7.96694		-12.0985	24.3019		13.3122
-13.3394	-4.69949		17.5029	22.7554		-16.2798
24.0032	6.00025		9.58054	12.8303		13.0278
29.9325	-14.0543		15.8182	9.78019		16.3725
-16.2885	-14.3631		18.9316	6.76519		-8.85694
-25.3288	-15.6362		-16.9089	6.30817		12.8889
21.2711	-16.8897		-21.8751	11.8565		9.03164
-23.4655	-10.4483		-14.3985	-12.1412		-16.4466
18.2726	-13.2831		-22.2509	6.57773		19.5116
23.3748	-19.2253		-16.3047	-14.3755		-16.5442
26.7908	-17.535		17.4017	-5.28612		-17.0079
27.7117	-17.5244		-16.4331	10.401		-13.1533
28.9016	-9.01646		21.0573	23.6753		-15.6301
21.3777	-12.1606		16.1067	-21.2111		18.8223
19.7973	-9.4838		19.3369	7.62419		-12.8068
2.42236	-2.96452		13.5426	6.94443		-15.8978
9.22881	-1.33739		16.2885	8.4854		-13.8176
-12.6527	7.13857		12.4141	6.78465		-7.26494
-8.21204	5.07683		12.13	2.82295		17.3808
29.8612	1.52063		14.5768	11.0781		-9.78287
-27.5758	-7.46701		12.2438	13.9794		-13.8208
3.97285	-5.37073		10.8226	20.9726		-6.82776
-9.01226	-2.93654		19.0352	26.0585		13.6962
31.1277	4.15726		-11.9137	-0.525015		-8.60215
33.8316	-2.75726		15.0821	22.7502		-13.0843
28.4081	4.39839		-7.0701	20.9445		7.88397
22.6384	6.12623		16.5756	3.52838		14.2411
20.6291	7.69832		16.5305	11.741		12.3741
24.6296	-4.99909		18.7876	10.9083		-15.5883
26.914	-12.2633		-17.554	-16.4923		-16.2927
-26.1118	-7.06032		-15.9618	-26.6498		22.6727
4.21732	-6.54104		23.6572	-16.5614		-19.6349
-15.974	-12.0965		-16.6285	-9.75455		20.5702
-7.52878	-7.45624		-21.1514	-26.5729		19.7318
23.978	-6.7079		24.0182	14.384		20.5528
21.6429	-4.36528		16.1785	12.7849		17.4552
22.7262	6.05503		-17.279	13.4325		14.6714
20.9767	-15.5551		-19.0692	7.98904		-11.4671
-23.6209	-21.1623		-16.5421	-14.0909		16.3635
-14.7737	-17.2195		-12.2526	12.7172		-9.77353
24.3041	-11.5644		15.8631	3.34715		16.5248
20.5253	-14.8516		-15.4084	-18.1163		11.0668
24.7973	-14.575		16.8145	-19.1366		17.0278
26.792	11.7056		-14.1726	17.3587		-14.1236
11.598	-13.7098		12.3383	15.9619		15.6613
14.3633	12.7209		8.39873	15.488		18.8333
8.83092	8.75519		-13.4444	21.2789		19.742
-12.7916	6.25302		11.5876	-9.01068		17.7637
23.5451	17.7889		19.6731	6.26248		-6.0891
21.552	-13.4859		11.6695	16.5675		-4.19823
31.4514	-16.4576		16.7558	16.8978		18.918
20.1689	-16.6287		17.1709	16.467		17.4344
25.2781	-17.307		9.94963	20.5357		-13.8129
30.3362	0.573331		18.1803	21.8172		16.3077
-27.9073	2.17937		19.6599	24.5094		13.8183
25.1746	7.21556		-20.1605	14.2901		19.4609
26.2504	4.247		-23.5046	17.3479		-8.8516
14.1511	4.778		-18.0478	21.653		15.5516
9.54143	6.25299		19.3697	18.6487		5.63461
8.93266	-2.89919		-24.6901	15.0547		13.1918
-15.3268	-12.6831		17.0849	16.9346		13.3624
25.1701	9.29298		-14.3802	21.3124		13.5734
8.52911	14.7319		13.0624	-12.5559		14.9981
-25.5443	4.42368		-18.5965	-16.5142		6.1993
22.4627	17.4904		14.5967	7.41404		11.4076
14.6796	13.3074		-18.331	16.7066		15.2657
20.5312	5.23734		20.4846	1.40678		-10.6214
19.403	5.89464		-16.2379	15.1692		-11.017
27.8682	1.65771		-9.82087	-19.615		-13.7296
23.1904	-2.95085		13.687	5.33665		-2.73766
26.956	18.4705		-13.3588	0.578666		-5.28397
12.0369	-3.8766		-14.8501	3.73139		8.24428
10.9387	6.34422		-14.3526	5.28705		-5.80799
-13.3372	-2.44676		-14.9662	2.23123		7.36563
-11.8065	-2.25315		15.8862	4.04894		-4.36252
20.8356	-2.14504		-10.1973	4.97673		-15.8992
27.8621	3.66129		-12.832	-2.02811		10.3008
-29.9571	-6.07826		-14.4064	3.231		20.229
23.9207	-4.47872		18.1771	3.84423		16.3974
35.7185	-3.68464		18.3915	4.49607		9.63256
32.4464	-4.97987		-23.3321	8.41549		-17.5624
22.19	4.71489		-23.9274	-5.81844		-7.6039
25.1124	-5.60389		17.6554	0.509707		15.6369
25.0218	-15.9609		15.32	-2.11778		11.7585
-26.7466	12.0636		-18.0667	4.00519		-15.3643
-17.9753	2.47387		15.2753	4.94422		-22.0614
19.1554	-2.844		-12.5988	16.79		12.26
21.6462	-12.9169		-17.7779	20.6708		-20.2314
-25.6315	12.4142		-15.0167	17.4504		-19.4984
24.0747	5.17387		-19.1611	18.6768		22.3103
11.2611	14.2047		11.2036	16.0342		-18.2809
6.97008	13.6399		15.0085	24.9088		-20.4874
-14.2867	9.06511		-14.5895	18.1732		21.9145
-13.0695	10.3451		16.0237	-26.188		-19.3671
-11.4751	13.2046		-12.2768	-15.5464		20.4833
18.9067	5.08406		-12.2285	-17.1269		21.6397
25.3069	-5.05989		18.5334	-29.0747		20.1236
-22.3932	3.09041		-12.1415	17.7249		-13.0766
-24.0206	3.91267		14.8782	-11.0654		14.8984
20.8769	8.22153		13.4588	4.16737		18.1739
-30.3842	3.46594		13.9148	8.40355		10.8187
2.87057	2.20018		-8.92029	5.52002		-14.1174
22.1608	-10.8484		-16.3947	7.69349		14.8859
18.7125	-13.2683		-16.8605	-16.0087		-14.0352
15.0686	12.153		17.5179	14.6602		-16.7807
-22.2809	18.4202		16.0424	12.8944		22.7283
21.4748	16.6781		-17.6141	14.2063		16.5183
11.1989	4.90318		12.4723	6.58473		-12.3384
7.12094	18.0195		13.725	0.679071		-15.0053
-3.71692	16.2066		17.0386	5.37096		17.9207
-3.88285	16.1639		-14.3371	0.615039		-16.1247
2.69824	15.7999		-14.25	8.45824		-6.30367
-5.54056	2.46094		-11.8838	16.6419		10.871
20.4256	15.3184		-16.9662	21.6491		-5.01064
24.3033	13.6539		12.5753	24.5126		6.28185
29.4636	3.44288		16.5493	17.0481		12.2196
23.2439	5.43318		11.1973	6.26905		15.3986
25.7046	6.40779		16.5022	11.2576		16.4166
31.6481	-10.8868		16.685	4.02551		16.2113
17.7782	17.085		-13.6248	16.0111		19.1169
26.9436	5.76848		-14.2859	9.33905		15.3651
21.801	2.43349		-3.50552	10.5807		13.0052
22.2698	3.72862		6.04907	9.5518		-17.1049
-20.75	17.2542		18.038	-16.0797		20.6735
-11.6749	16.5516		16.9572	-19.1966		17.5192
-27.3882	15.5743		-18.5174	-16.1012		-21.6035
13.6627	-7.79832		-19.3334	-14.8153		-15.8506
28.3763	2.28252		-18.2748	15.7196		-12.8148
13.8907	-3.22441		15.256	8.60599		-16.8522
26.8476	-4.29757		-14.3161	-4.8338		18.3783
29.3861	-3.65427		-18.9558	7.3541		-15.8473
22.0553	-4.45317		-13.1064	-19.2501		15.1232
23.5575	-3.11615		17.0664	-12.1358		-16.2645
18.6324	5.52774		-15.5234	14.9661		-15.4481
-18.1132	3.47453		16.1712	-14.2559		-14.1881
24.7856	-8.06612		19.2313	22.6189		-12.1051
21.8792	3.17968		-18.9289	18.3003		-11.6911
17.5435	-5.55817		18.6454	18.8053		-15.6016
22.6809	-12.2956		-16.6181	14.8176		-14.017
-18.867	13.3191		-16.3556	-14.998		16.6828
20.4791	13.9906		17.0456	12.0707		-11.7526
20.28	10.8361		16.832	16.4831		16.5853
17.5375	-6.68937		13.5916	5.81911		-15.5166
15.1349	1.57717		-11.1037	17.9456		-19.1288
-10.1383	-14.5715		-15.9007	11.591		21.458
9.55496	-16.7863		-14.5092	4.20149		14.6272
-1.41479	11.3779		-12.9469	-2.05757		10.8809
13.7833	-16.745		-14.2502	-20.7027		-10.579
-11.6583	14.5256		-19.1678	-20.1182		-12.5784
-19.201	18.2469		-7.01855	-20.9712		9.98643
24.3235	8.59962		21.4048	20.7984		10.6642
3.09932	3.70761		-18.1906	21.4892		10.4592
22.5045	-2.36855		-17.2552	-12.8732		-5.0689
19.3732	-3.94593		-20.5048	8.83678		5.87803
24.9577	4.61151		-15.346	5.92188		14.2288
30.0286	-6.06417		-22.5205	-19.1045		-4.0703
23.2827	-3.07147		18.3408	-21.2191		-8.2314
22.2307	2.98487		-20.147	-23.2487		6.40539
21.7848	-7.91169		-13.2711	-18.5963		-8.23913
13.6074	5.69657		-19.4809	-17.0379		-2.7625
5.49369	-4.18659		18.4413	-18.6944		-0.971263
25.4762	-2.7901		18.1377	-21.7687		-2.51194
9.28009	21.6805		16.4723	16.6749		-0.896863
8.70083	-23.1801		16.3539	4.76794		-2.18491
4.94555	-17.2842		-17.6341	5.19158		-1.02305
-6.99219	-19.3069		21.8849	0.724163		-2.60326
-4.3935	-15.4625		-15.0884	0.881742		-0.710439
-5.0252	-19.5832		-16.7751	-9.3904		-1.0701
-1.30612	-12.721		12.2016	-17.9959		-1.9897
24.896	-24.9624		15.6142	-20.6859		-2.753
16.1153	-15.3864		8.77017	-18.6241		-1.8638
22.2862	-19.9399		10.9454	10.1051		-3.23439
26.0031	-16.9782		-11.4855	15.6857		-1.1818
19.3313	-15.8965		-15.6428	13.0893		-3.65313
20.7301	-1.16611		-7.7177	18.4667		-1.52334
13.0318	-16.1099		-15.8044	13.8348		-2.46468
31.2794	-16.3213		19.3277	15.0696		-1.74575
20.7775	-8.96027		-22.1813	17.002		-2.32724
21.708	6.2435		-20.2174	-10.1375		-1.9323
19.9569	-10.3746		-17.1429	-14.93		-4.55396
9.97807	-4.96035		26.0128	19.4457		-6.19397
11.426	-6.53734		-17.4123	17.1526		-6.24549
-8.15903	3.76183		-22.1312	16.1732		-4.29353
-10.2185	2.58172		-17.9398	14.6678		-6.63282
22.3046	-12.3946		-18.0729	-13.831		-15.066
24.6048	-7.95552		14.6864	-11.6963		-12.1428
29.1691	-1.39462		18.1713	11.5259		-1.68023
24.2705	-17.5126		-17.0915	15.8001		-2.64406
24.9877	18.6112		13.8558	4.83506		-4.46445
23.7668	4.14208		15.7201	5.69106		-4.30153
24.47	15.2054		-17.8784	-1.07008		-5.77245
27.8646	-15.8774		17.3038	4.69188		-3.03276
23.5997	-3.70978		19.7758	11.9432		-6.25243
19.9754	4.3534		-19.2391	7.26453		-4.67336
28.2496	12.6177		-17.3828	-17.4001		-1.67773
25.7971	9.7439		11.7973	23.3797		-3.25639
18.0773	13.3445		-17.2496	-15.6182		-2.20946
7.33407	12.3104		-10.8814	-19.0152		-0.782902
8.65033	14.6864		-16.7173	-16.3435		-4.29341
-4.01729	12.9147		11.1145	-26.5825		-0.714949
-18.1088	7.07427		-14.8318	-19.8676		-2.52249
-6.39708	-1.66254		20.8513	18.0524		2.01829
-5.95343	17.4924		25.5435	-20.6866		-1.68487
6.42317	-12.8998		19.4908	-21.0153		-2.54398
-10.5136	3.22895		-25.0074	-20.6224		-3.17857
-17.0908	4.89123		19.2996	15.7757		-0.714652
11.3753	3.99269		-21.5751	20.8032		-3.84806
27.0101	-5.69736		14.3214	-20.3269		-1.11867
-27.1603	-4.99549		-15.5332	20.6987		-3.27844
-32.5166	-4.83013		-16.3015	21.0139		-2.70967
-24.3928	-6.05845		18.0937	15.0736		-2.6846
27.0023	-10.5034		17.6445	10.207		11.7027
20.0037	3.8421		-17.7913	8.84987		-1.61909
-18.3756	10.7915		-17.9907	1.6046		-2.98276
-23.9958	11.8195		13.9897	1.314		-5.61088
-26.9124	14.4968		13.0758	0.652751		-2.5199
28.3097	15.603		-15.2565	2.817		-4.65822
-27.5049	17.9589		17.8729	5.39265		-1.75009
-12.2209	5.7125		-17.0131	11.3086		-2.9862
-11.1006	15.8485		-13.6775	-17.3003		-6.51298
9.88884	9.2192		20.6925	17.4736		-2.35259
28.2421	14.6653		11.9797	20.9623		-7.62157
29.0161	12.3798		16.8836	-10.6638		-2.5673
13.3044	14.2989		10.6211	9.70657		-6.38919
32.0792	3.55339		-16.1934	10.31		-3.33089
-32.5757	11.1498		-16.964	12.1099		-6.12025
25.6998	1.51475		17.5984	8.34933		-6.25564
23.0882	-2.30972		15.5782	6.16981		-7.17587
-25.0077	-4.70083		-15.7792	-17.5298		-8.28438
21.0198	-4.40945		20.3115	18.4345		-7.30336
11.5882	-6.07935		11.6665	17.2397		-3.58439
24.1898	7.21778		19.3629	-17.506		-5.17805
14.8234	6.91151		-14.2236	14.8603		8.51143
24.4561	-0.247203		18.4932	14.4441		15.1543
9.47548	16.0642		-17.5704	12.6212		-3.07812
7.42426	13.0674		-16.0416	4.65958		-2.2505
-2.92237	11.3941		18.9922	20.624		-3.86773
-13.8516	-7.14863		-15.667	21.0548		-4.32481
-23.3408	10.3038		14.8488	12.8053		-1.74009
-1.18416	4.93363		16.0897	15.3998		-2.54996
20.9035	3.32262		17.1138	5.09008		-0.407721
25.9083	0.66186		15.9077	6.96332		-4.02905
24.6404	5.68121		-14.4178	1.01325		-1.5526
20.5918	-3.94118		-14.0479	4.0878		-3.7516
-26.6134	15.0624		-13.0373	2.65511		-1.68106
18.3309	1.90546		11.7441	3.88098		-2.85694
22.3865	-4.27543		10.1877	8.45468		-1.20438
24.2657	-11.8915		16.9947	-16.5496		-5.33702
19.6482	9.65249		-14.0888	18.6489		-6.34656
25.6071	-20.0425		17.5205	17.3417		-5.77879
12.2173	17.8423		-14.6859	-19.2791		-7.3037
9.90921	5.98525		-17.718	17.2417		15.8492
3.94264	19.793		6.98171	-18.5301		12.1123
12.1588	2.04385		-16.9537	-19.7962		13.7107
-16.326	18.9705		18.2506	-18.0161		-2.83969
29.0145	3.01984		19.6841	14.5195		4.49931
25.8043	15.3769		-15.3224	12.9375		-2.77802
23.9448	11.7887		-22.836	13.386		-1.76119
19.8077	-11.2649		-17.1197	11.5906		-4.24977
28.091	-13.3086		15.4542	14.6708		-2.49484
20.5085	4.54032		20.8208	-14.4325		-4.82736
23.5887	14.0983		-23.3298	12.9562		-3.33855
16.3857	1.9004		-12.5863	13.6384		-6.16181
1.69719	-2.43383		-14.1915	17.9098		-4.3924
22.0173	2.04111		-12.9689	-12.6223		-2.76556
24.139	-15.5668		-19.0387	-12.2105		-6.03414
14.0742	16.2106		16.8878	-11.9464		-2.91695
-10.1801	4.53744		-15.2139	-13.6356		-4.51341
20.1552	12.7088		10.3217	1.2445		-7.44191
20.08	21.5013		17.2936	3.33101		-4.78438
20.8411	14.3215		-17.7903	5.81586		-6.88701
22.1358	22.1913		-18.1986	9.27909		-6.54964
24.5684	17.4727		-20.0202	10.2696		-14.3121
21.3901	-10.1783		20.2052	-10.0276		8.15259
25.911	-7.71769		26.4518	22.2485		-13.8446
20.7914	19.1302		16.8496	-19.5229		-13.1673
25.4331	16.6357		-22.5057	20.3793		-8.44593
22.6025	15.7717		19.9541	-8.35949		9.56967
7.11365	19.6687		14.8202	10.5934		-6.53702
13.3478	16.01		13.3654	6.19272		-2.28331
7.78166	2.5348		-15.1365	-14.0969		-3.20389
4.01771	-1.06008		-10.7713	11.6365		-7.04237
-19.1992	0.938834		-13.2933	-16.1164		-6.03329
9.6086	3.07984		19.2308	5.93183		-6.43853
-9.2893	2.47181		-17.6449	7.49607		-9.92545
-9.2511	-7.32095		15.2371	10.377		-11.7575
8.27579	2.55347		20.0009	9.12252		14.6645
2.63104	4.59281		-22.0163	-9.53874		-8.48996
16.6867	11.2665		-3.35491	-9.35179		-5.38797
24.4596	16.9878		-6.88571	14.1058		-10.8751
25.8713	17.0788		-18.2143	8.15262		-5.76016
17.8756	13.3469		18.4073	6.77932		-5.55696
29.3474	17.2433		-21.962	4.82932		-8.44756
25.281	16.4145		-22.7934	-1.78056		-4.20779
16.7176	-17.2015		-15.7305	8.10079		-6.24138
29.9941	14.4939		-23.0332	10.4895		-9.14232
-28.5577	14.7382		-14.2283	8.46088		-3.21092
26.3148	12.2844		17.6075	8.97602		-9.38351
-10.6625	14.4549		25.6122	9.62602		-3.81555
-6.30219	15.3142		17.029	5.70566		-6.71677
-8.98246	14.5003		-1.18358	-11.2415		-4.79424
-21.6999	14.9043		22.6628	19.3057		-4.56614
23.328	16.4586		15.8519	-14.2306		-8.56609
28.0458	20.9912		19.2965	16.2665		-5.21676
23.3461	6.74627		17.3231	20.7223		-6.48563
23.4868	7.42535		-17.1842	18.9861		-6.4799
30.1255	5.56885		17.6399	-19.6236		-6.81222
16.3497	2.58957		23.1557	14.8115		-3.51033
20.6288	-9.68701		10.7057	-18.6779		-8.54408
24.0736	-7.9123		16.6118	-18.7716		-7.84062
26.0202	4.1271		-15.5872	-21.0538		-9.0071
15.8672	4.49432		18.7642	-13.9978		-6.70745
13.2717	-2.28791		19.3905	-15.1232		-7.50729
4.29062	6.35505		-11.8283	-12.5061		-6.07072
-6.17294	-4.15325		-13.1681	16.6332		9.12426
9.45578	3.71443		18.4849	12.4746		-13.4267
-7.30556	0.886811		10.9587	14.511		10.5402
20.1615	11.243		-15.6008	14.3102		-15.2576
25.3114	-19.0811		-17.6707	12.0509		-7.29925
23.9484	-22.3814		-5.51502	15.9624		-7.70713
29.9603	-19.0327		-1.98115	8.47189		-12.6516
-1.58509	-17.5464		-16.1535	4.28239		-13.4609
20.8904	-20.6332		17.0293	1.60568		-9.1764
20.6652	-16.0783		21.9897	4.81155		-17.8077
-24.597	-16.2157		17.9597	4.17227		-19.1203
-21.6999	-16.2308		-23.773	8.55419		10.0521
19.8164	-15.6311		26.7762	8.17442		-6.68284
21.5069	-12.562		17.5353	6.18906		-6.29245
21.4941	-16.2682		-22.0905	10.649		-7.43118
11.0598	-18.7796		17.3708	8.44144		2.18545
13.7091	-14.0079		23.7761	8.8664		1.98934
-2.02369	-13.7424		20.736	-16.986		5.52644
-2.56422	-15.3231		23.2467	-22.9198		2.62298
13.4208	-9.25389		18.7558	-19.8495		3.89684
17.2324	-16.3703		19.9974	-13.9121		3.8402
14.6069	-18.0346		-25.4343	-22.0912		3.98621
25.7412	-20.0922		18.4554	-20.9771		3.82497
30.374	-9.21865		-21.2338	-16.1097		2.83097
2.62013	-7.03509		20.2602	-17.057		-4.59794
25.3083	-1.54177		18.1421	-21.5789		4.70161
-18.5979	13.0258		16.4552	-23.0391		6.50173
23.0944	-4.09298		16.5113	17.204		3.61258
24.3787	-0.643968		22.2662	18.1749		3.93132
27.0765	-2.13468		-16.8125	-21.0374		-5.06522
-15.6299	-4.54517		22.9452	-9.99571		8.76787
-13.4819	-4.18839		20.5608	-17.7645		2.48074
20.4343	4.1553		-22.0082	-9.65823		5.56993
23.1105	-3.8425		19.8145	3.27771		8.02969
25.6751	12.7674		18.4177	4.48197		5.89066
-12.6135	-21.0446		11.4025	5.9218		6.76757
25.6182	-13.1803		-10.5526	6.91123		-6.05315
24.8906	-12.7758		-14.6383	8.44705		7.28142
28.951	-15.9003		-12.1605	0.168609		12.3404
26.6184	-16.16		15.7596	-3.06556		11.521
22.4756	16.1582		-10.6309	2.38663		-10.6137
19.7686	-21.5036		-15.0855	1.33368		-11.1014
-24.1142	-19.1454		12.4338	-5.82702		10.2897
16.3383	-17.2634		-15.539	-4.11059		-14.8697
22.4826	-5.76022		9.64855	-6.18021		20.1439
21.4932	-7.64797		-17.3458	0.966557		0.793255
19.0687	-2.46465		11.6347	1.92107		-5.96896
-15.6693	-0.784355		18.429	11.2713		6.23098
-21.1698	-2.06183		-16.616	23.9752		-4.17972
19.9678	5.23891		-3.08715	20.066		16.4501
-10.1631	3.79551		-9.58852	19.9044		18.5106
14.2286	4.88608		-16.4385	25.5804		18.6268
21.2811	-3.9588		22.6317	23.9568		-3.62194
19.3224	7.10371		20.9329	-12.108		17.9199
7.80378	-5.02999		17.7905	-13.7371		13.1149
13.7653	3.9436		19.327	9.58139		-15.673
-2.05947	4.50742		21.8261	-4.12248		-4.66091
-0.894773	3.84081		-15.2336	-5.3276		-12.0729
8.4039	3.53235		-22.8778	-2.73039		-15.2885
-16.3698	-8.22384		11.6774	1.34972		16.533
17.2823	3.68304		22.2554	18.0521		-0.903543
23.4527	6.25982		-14.8491	14.7896		17.9323
16.5841	-0.446895		21.014	21.6583		9.6206
-31.7496	1.96937		19.7725	21.8791		14.7823
-17.4801	3.29024		13.1722	15.0825		7.06207
25.4329	-5.85943		-15.7837	5.41309		-2.1273
21.7573	-8.92911		-14.7853	-0.918765		13.201
-1.0806	-22.1213		-16.7927	-1.03507		10.4961
22.4485	-14.096		20.8148	-2.94268		-2.7498
23.3195	-22.174		-16.613	-3.69949		-4.37574
26.2433	-17.4827		18.9886	-2.53603		-1.12334
26.3125	-14.1716		-14.8512	-3.68844		11.6416
-0.940311	16.7018		-16.2219	-3.14717		-4.05428
18.612	-19.8733		-15.1603	1.43319		1.76467
17.1379	-18.977		8.65681	-3.53758		-1.07022
-16.93	-13.7965		14.307	-5.3543		20.2097
-15.912	-19.6277		-9.02297	1.93235		-16.3035
34.5683	-13.7112		-15.4661	-2.90575		-14.6747
0.839483	-9.02891		14.0847	-3.84639		-3.69156
-27.1008	-4.72986		-3.61534	-3.40544		-4.15658
7.78654	6.06815		-5.11575	-1.30213		-18.02
-26.9772	-1.46494		16.187	0.984765		-12.3022
22.2483	2.2831		17.5196	8.89847		-2.53599
21.243	0.593541		21.4439	12.1603		-13.9075
13.696	-10.4246		-13.6758	16.2669		-12.9007
29.2932	11.8869		-17.7108	12.1529		-20.5446
23.2343	17.1167		17.4207	21.2391		19.5502
9.7468	15.2565		19.9859	13.4714		-1.45536
5.9853	14.1354		16.6724	5.1743		19.4081
-6.06831	3.74853		17.2269	15.0772		4.85318
15.0528	9.61387		19.5737	12.7852		-11.3185
-5.08349	-10.925		17.1235	17.0956		-13.8396
19.4162	-8.6487		16.8297	17.2387		-14.7076
23.2306	3.72834		12.5778	14.9636		-11.9287
20.3588	-11.38		17.4644	-16.8655		0.62601
22.8078	10.2793		-15.8716	-12.7637		-7.04607
14.0837	4.19378		-17.5996	6.4261		-11.7028
22.7027	5.71846		15.442	12.0891		-2.14706
22.1059	10.071		16.153	15.4249		7.46165
26.335	-0.526317		-11.6707	18.143		4.86771
-26.0859	-3.5518		-13.9632	-19.2764		-3.65493
6.33465	3.52567		12.3635	-12.6852		19.2708
10.8772	3.48248		-14.3131	8.59772		9.49707
-2.88289	4.58752		-10.7644	14.833		1.35818
10.7826	5.61354		-15.4462	12.0341		7.35924
-14.8681	6.48402		-13.6133	14.72		3.73051
21.1075	5.04032		-5.33221	9.37904		13.2441
17.0538	6.62588		19.0561	20.4959		10.8947
26.7394	7.62312		19.3897	7.91118		0.392588
14.1203	4.90086		-20.8664	7.56198		6.85777
27.5756	6.0164		-15.9383	25.2381		1.83179
24.8794	-3.87711		16.8696	24.321		5.93029
18.0367	3.64583		17.6191	14.9109		1.02473
17.185	-10.6207		14.2412	5.85057		6.3807
24.6694	2.02711		20.9624	12.6815		1.13091
14.9192	3.45036		-17.022	8.51371		3.37728
21.6118	1.62032		-21.406	17.424		-0.870419
15.0443	6.43401		17.6333	5.80944		-1.81342
21.7063	-18.5846		-17.5783	6.89177		-6.46391
5.18538	-18.9153		15.5475	4.42585		-13.0219
2.24079	-13.2677		-17.601	4.67293		-9.46409
10.8068	-15.1471		-16.8878	4.54721		-0.981002
6.88907	-17.5032		-14.6543	10.3535		8.52193
10.8203	-16.3547		13.2551	8.05574		18.7587
-9.9967	-22.9963		-16.6415	1.31513		-4.98319
21.9264	-18.1529		-10.7294	9.0538		15.8869
20.7551	-24.1089		15.105	6.95011		-14.1551
1.12888	-18.375		-16.3088	2.35258		-15.383
16.0702	23.9013		14.1633	8.94637		0.785471
15.9466	-16.7651		-12.9923	9.81935		-17.2331
22.3238	-15.168		-16.8131	6.62692		6.13582
24.4525	-16.7266		11.5017	12.5713		17.391
16.8105	-18.646		17.8707	9.55163		6.48174
27.1171	-17.4874		19.2381	15.1954		-1.71798
24.9053	12.6347		16.2001	12.0883		9.32179
22.6286	-3.56823		19.5003	1.79371		8.61568
21.3344	6.25431		-22.4866	12.4207		-4.49403
9.10495	3.68091		15.2568	11.1766		-6.59675
7.89767	-7.91921		-17.0065	13.2091		-3.15653
-0.666105	-22.7684		-19.9599	19.6714		-3.99008
-1.4311	19.3427		-18.8262	19.1002		2.28306
8.82801	16.2307		17.8635	11.3024		-0.489048
-11.0248	16.2024		19.3739	-6.43569		-16.3574
14.8299	10.9954		-11.5151	15.6114		-1.35215
16.4097	15.0792		15.0764	-11.7704		8.42118
26.4153	15.3672		16.5552	-8.34374		-13.1735
24.6543	16.4924		-14.0252	14.3288		20.1101
-25.9422	13.8246		-16.6414	13.1256		1.98714
21.7498	13.2996		-15.8678	10.5809		-0.205671
25.2211	13.544		18.2976	16.0612		-0.820987
25.5508	13.0228		-12.4158	7.28177		3.84536
15.9869	-6.66749		-8.96531	9.56918		-0.499211
-23.8696	15.9986		17.4765	7.59724		3.15074
-27.311	8.99343		14.6916	-3.47139		-2.46542
26.3591	2.81508		14.7249	-2.97466		0.92547
21.0437	-2.22751		-13.5079	-10.8336		-4.64738
17.7483	-16.0405		-15.0416	-12.496		6.66422
18.9405	12.282		-1.99752	-4.56602		-6.52229
18.3377	7.66875		16.4921	-10.3113		-1.65068
-22.879	5.98631		18.3692	-15.8964		-1.79743
7.56087	4.59674		16.5206	-10.5533		-1.23542
10.7965	17.1758		26.9696	-19.1622		8.41886
0.635942	16.8725		19.7488	-16.2475		4.0845
3.92311	16.2568		-15.5155	-17.9042		2.08201
-3.59034	5.82623		-14.879	-16.0991		-2.49495
15.6454	6.5403		-14.8027	-0.666323		-3.16404
31.8309	1.6581		16.2907	31.2517		1.29158
20.4606	-2.29937		-20.6139	12.6593		11.1117
25.3137	-14.0018		19.364	-4.42015		-2.36812
27.4884	-5.16857		-15.7131	3.94001		-1.40483
32.004	-6.61099		-13.8913	14.4042		-13.4707
20.1057	-4.90605		16.9488	13.495		3.88655
32.326	13.2203		-13.6434	6.1075		-4.3405
24.0253	23.9376		-18.7328	-3.31209		-2.77056
21.4496	12.0089		-14.3863	3.02059		-2.24768
15.9533	17.1375		-14.6081	5.85475		-9.17114
-7.22627	4.09494		16.675	5.5883		-0.592178
9.51225	14.453		-10.3636	13.7725		-5.41204
17.1851	9.62606		17.0896	-5.75994		-2.42152
11.9268	24.4706		-13.5093	-16.8647		12.863
13.9423	20.1194		-16.3317	4.24929		-2.06485
4.20849	15.0742		11.5529	-9.43143		9.89692
3.7112	-21.0663		15.22	-15.2538		6.76081
5.56105	19.8707		-15.5031	-18.619		2.86263
6.61916	18.7269		18.4159	-12.3452		-0.773452
7.80273	18.3111		-16.1805	-11.1011		-1.87957
3.94951	19.1749		-23.5991	-7.40599		4.96228
7.13357	12.735		-15.0337	3.95768		-0.539796
-6.09621	-0.769339		23.7012	-6.22611		6.84163
-3.37203	-0.809345		16.4195	-9.17231		8.56154
10.4755	10.6278		15.4743	9.29364		-4.42934
5.70498	-21.3694		-19.9558	-11.5503		-0.361452
5.34162	-19.4366		-13.0441	11.252		15.1038
6.56507	-15.1278		-19.3331	14.9193		5.25665
-1.81634	-15.1282		18.3278	-13.4981		14.1247
-4.9408	26.7777		16.3468	4.74436		1.68693
-6.49126	-20.4562		16.1636	14.9694		-2.01355
16.1662	-22.0073		-17.9486	15.0193		-2.36648
23.902	-18.0911		-15.1348	-9.28986		7.5448
4.46305	-18.8635		19.1702	0.994266		5.3248
7.17009	-14.0077		-12.8611	19.5954		1.82669
25.3561	-23.5707		17.4684	-22.6606		4.88554
30.6275	-6.06489		-8.374	-19.167		1.63492
27.8152	-26.1247		-10.1457	-19.5212		4.88062
18.4855	-20.5362		11.6125	-22.6011		2.46877
-29.6075	-12.5201		-12.0158	-20.0288		-2.21103
28.6085	-13.0955		-11.8427	-21.5035		-3.54989
25.4103	5.82817		-14.2688	4.94632		-4.50001
23.9385	0.359186		19.5655	5.07851		-2.5224
30.2758	-16.805		14.0223	-9.41122		-3.77896
24.8554	0.588219		23.5357	-2.57512		-5.72035
27.0492	-3.33155		-22.8118	-3.89783		0.663769
26.5132	5.35656		-19.9466	-24.4359		-7.37102
1.84036	-14.6727		16.5852	16.822		-6.09938
0.55158	-22.3967		15.8358	-24.7322		5.47505
-0.647433	19.7611		21.7961	-6.78751		-5.04233
-11.9283	8.68149		-16.4152	-5.24485		-2.83316
18.3929	-11.6249		-9.72059	-6.2943		5.68409
-12.2922	-3.85967		19.7666	9.45111		4.82801
16.5192	24.5323		-16.8909	-6.55693		5.01401
2.79121	-22.6924		-14.2016	-6.7832		3.15805
2.17517	19.6297		12.458	-5.87445		5.69765
2.14878	5.73341		16.2852	-4.38971		5.96526
12.5487	7.20596		-16.2644	-6.59575		9.11017
16.8974	7.14782		-21.858	9.71123		7.62566
24.4765	6.06007		18.6353	-5.46015		5.86654
23.0496	-11.9402		-15.6096	11.7191		8.84692
30.2676	-5.89307		18.7595	3.82795		6.88974
22.9415	-4.69549		-16.952	-11.6748		5.86775
18.2052	-19.0039		-13.8601	-10.7569		5.33922
20.6865	18.6199		16.0187	-11.8063		7.5733
23.5622	18.7907		-14.0345	-5.61104		4.90289
29.2439	12.4104		-12.939	-7.58927		12.1191
5.48608	13.912		12.3349	-8.29861		-1.10563
18.655	22.8963		-1.09255	-5.41816		9.41944
-14.0323	8.46569		8.95765	-11.9287		5.3098
-27.3938	11.4264		18.2946	-15.4405		-1.77176
30.9923	14.0855		19.5709	-26.6398		4.92402
33.8385	16.898		-16.7042	-24.5114		-0.604825
33.2698	7.62987		31.0704	-9.56079		2.69323
24.5679	23.8738		23.388	-8.41995		-0.932114
23.2902	16.6063		21.2763	11.7284		-2.73955
17.6481	17.0269		14.7382	14.0639		-5.56094
21.6923	19.901		-21.0937	0.954213		-1.69023
16.7286	17.1099		20.2107	-2.22046		3.96108
23.0011	19.5356		-14.3192	5.89829		-1.33166
24.0886	15.8801		12.0737	-6.04949
24.3095	13.7827		-18.5724	17.4074
10.5562	3.46583		14.9717	16.8448
15.7737	6.03669		17.581	10.3173
7.35887	12.9719		-16.2842	16.5062
-8.25191	-7.12164		20.0639	2.60672
-6.09076	12.6408		12.0671	-7.82785
8.16566	16.112		-13.5752	-8.15173
26.6764	21.877		14.9463	3.62256
-16.2105	12.982		13.3124	-7.95841
13.0754	24.1841		17.1418	-4.22029
-21.7733	-4.12705		9.73193	-2.47319
11.1756	26.1512		-17.1248	-3.79217
-15.5217	16.1352		8.72574	-14.1108
-18.3736	11.4168		-15.9682	-3.62882
-10.8533	15.6599		15.0758	-13.9153
-29.3401	1.50056		20.932	-18.1881
-23.9849	0.723728		-14.0188	-14.0239
-19.4314	2.06644		24.3257	-7.98099
-22.3188	1.44142		14.14	-9.36499
27.5607	-6.94584		21.4801	-4.71234
-15.9873	-4.24893		17.8488	-3.88512
-20.4256	5.20074		22.4176	-13.8606
15.1446	6.70417		20.5271	-12.7712
-20.1876	3.26164		14.0608	-12.1274
14.6942	-14.1159		-19.297	-4.22289
14.7779	9.16131		15.6039	22.8327
27.4333	9.66468		-12.5404	17.0963
24.7576	26.3831		17.071	-8.98721
-19.9152	21.7701		21.1901	14.983
12.4211	-21.0098		13.6719	-15.8035
-7.14143	21.056		-16.4374	-9.39242
-16.6586	16.0558		20.3554	-3.9036
-14.2414	2.98297		18.1662	-7.31763
-11.9881	4.66893		10.724	-14.2175
2.63591	3.17967		14.1106	-11.3745
18.2884	-1.49931		19.9329	-10.2477
-17.1461	2.01469		-12.4467	-8.05636
-15.9403	6.83101		16.2887	-11.3815
-19.4867	1.40723		-10.2133	-7.206
-12.4309	5.21067		11.9069	-11.5266
-14.9614	3.63129		-12.5037	5.95523
-1.08085	5.34047		-12.7825	-7.55762
2.27142	3.19182		-2.59964	-6.28772
13.2179	2.64293		-3.19297	-5.03877
9.55175	-1.95398		-8.65121	8.88281
-28.0305	4.42158		-8.60812	-5.61622
-24.116	4.7294		-9.29961	-7.62372
-24.8396	3.79318		8.86579	-6.82201
24.0552	1.58167		-5.25671	-18.5202
-19.3609	7.6399		-12.4631	-18.4401
-23.6507	10.7105		-13.2514	-17.2366
-27.3767	-21.2261		19.4122	-13.6681
-25.9505	-18.2862		-8.63006	-15.7292
11.7388	-6.09211		-19.5805	16.7891
7.22097	-20.528		3.98232	15.8472
-13.9695	-18.8566		5.94101	5.19179
33.8672	-20.039		-10.6879	-8.44743
-24.2661	-17.3706		-11.6417	-7.68594
-19.2182	-20.2934		10.406	-11.6113
29.4767	-19.7232		-16.1609	16.0893
-21.047	-18.4197		10.2231	18.8889
-19.3014	-17.7894		-12.9784	15.6726
26.4178	-17.6798		12.7861	13.8323
24.887	-17.9661		-11.7425	-12.9751
20.981	-19.0108		-11.7796	-14.6134
-28.3913	-19.6559		8.5723	-4.96024
-10.4256	-19.5113		-10.3725	-3.98084
-8.00394	-20.7304		-16.6037	-5.2774
-4.005	-20.6479		-11.4637	-13.5469
-5.80342	-21.7863		-8.35892	-16.0106
-3.22708	-20.1063		11.7398	-18.9771
-5.56672	-11.0892		-12.2929	-20.9642
-0.783773	-8.94574		13.2373	-24.784
-0.703882	-6.66393		-13.7798	-14.0886
19.0762	-8.07648		-16.2676	-11.949
-7.17887	-12.3416		-12.3461	-8.21592
6.07933	2.386		8.79997	-8.98909
27.9835	10.9766		-11.0581	15.0033
-21.7572	18.2302		-12.0797	19.5908
-22.8495	-10.0645		14.983	8.70183
-21.6142	15.9312		-8.65224	5.99096
-19.0739	18.4998		12.2596	-9.39769
-25.8876	18.8125		5.54377	-7.49572
-17.8055	20.9554		4.43727	-13.3453
28.9195	9.01468		9.51123	-7.05904
-22.3498	18.8765		10.4915	-3.79071
-14.8942	21.728		7.5141	3.01563
-25.5542	19.29		7.30939	9.9639
-27.9435	19.4986		-11.6414	-9.43443
-22.2605	19.7802		18.858	-11.3831
-6.38216	4.80229		18.0961	10.7742
5.74146	19.327		-12.3995	12.3827
-6.50678	17.0217		18.4854	-1.88298
-5.86817	18.5672		17.7666	-2.22887
4.27493	21.6117		-17.6632	-6.2805
-6.44718	19.596		-10.3262	2.69914
-3.12804	11.9477		-12.4971	-4.67665
-18.5682	-4.554		-14.9205	11.3482
-16.7406	-7.95583		-11.6818	-2.40944
9.95918	-4.84069		-12.4474	-5.49203
6.1969	-5.18654		-11.9021	-6.45323
-31.9321	-9.39908		10.1421	-17.8416
-21.0462	17.555		-15.4588	8.19436
-22.8585	2.6126		-10.1491	8.55532
-23.336	1.66163		-11.55	7.96296
-22.4188	27.6924		15.2107	-18.5542
-25.3799	18.0901		10.8456	-8.47445
-24.5262	16.7144		-14.6216	-11.4906
-25.6227	13.6165		13.2615	-19.0772
-22.0327	-9.67391		12.1774	-13.0442
24.6145	-14.9222		-8.80852	-6.34176
23.7637	18.5351		12.3376	-5.60453
-21.7143	-3.23955		-12.19	-12.4868
15.6922	21.8361		13.1518	-8.83472
-2.53441	10.006		8.96771	-18.1372
-1.48134	-15.6041		-10.2081	-17.7313
-4.83833	10.0962		15.5243	-19.4956
-1.74529	-2.66449		11.4287	-3.11765
-8.14194	5.64725		-8.86859	-7.14892
-4.6975	5.60458		11.2421	-6.91023
18.5906	-13.5278		4.27499	11.3624
7.76799	-19.2142		3.37766	6.82123
-17.0198	11.9516		-5.35657	-13.3328
-27.2956	-12.2919		9.3079	-8.51008
-14.8453	-12.0898		5.15994	-13.0759
-20.1208	-15.3586		4.78887	10.0909
-20.4228	-7.09589		5.55937	-15.7672
-26.8208	-11.9281		-8.72282	-19.3777
-27.5254	-11.3415		16.3816	12.4224
-23.889	-10.2708		-16.2049	19.2119
-10.1943	16.3142		13.9833	11.6897
27.6262	10.5874		10.1209	-8.34344
-17.1038	6.10934		14.7741	-15.0096
23.1143	-6.5626		1.74311	-5.478
-17.9628	-12.3614		16.0371	-5.44978
-20.6586	-14.4523		16.0363	-4.30359
-16.0897	-18.0816		7.22156	-1.56611
-9.26145	-13.0063		-13.6402	5.99178
12.8461	-15.3164		14.7983	-10.374
-9.84586	-13.038		-15.3467	9.45779
0.773398	-11.9003		-10.2407	-10.8414
29.0952	7.51533		-9.79301	-7.41737
-21.7839	-9.44177		11.9646	-7.31132
-20.9233	-13.4659		12.9007	-11.2926
-10.6193	6.31869		-10.0193	-5.61092
31.4211	-7.17807		-11.3438	-8.29049
-15.9467	-8.76775		14.1397	-4.05874
-20.5456	-11.3192		-11.1811	5.9152
-25.2911	-15.9181		-16.0707	-4.70626
23.7435	-17.4784		12.4848	5.79779
-18.0473	-14.1052		5.62619	-8.89195
7.17398	12.4399		-15.7555	6.89645
-5.88715	13.527		14.9232	-5.00047
-3.4328	14.9514		-11.5538	-12.9378
-3.54825	-15.8926		-9.88239	-6.43963
-3.32283	-20.3458		-13.5884	-15.1759
-3.86289	-13.5479		16.9288	-14.7631
-14.2096	-14.9304		14.643	19.7431
9.01019	11.782		-15.3631	-18.7914
-27.8769	-6.93198		-11.1398	12.4744
-19.4944	-5.32345		-10.7927	11.6087
-28.2259	-11.9838		-20.1637	10.0429
-19.7164	-13.862		9.32549	-13.2351
-21.7208	-14.089		6.32267	-17.2712
-17.6068	15.9094		9.57913	-9.10249
-23.6702	-11.7413		4.77741	-13.6857
-18.0193	-13.9475		4.30403	-4.97632
26.3031	-6.09848		3.53679	-8.48801
21.0343	-5.19088		7.28456	-11.7375
-19.3704	-6.37014		15.3666	-13.0724
-23.3793	-8.02972		13.3204	-15.2414
-4.46491	-10.1306		-18.1566	-12.1967
6.78873	9.48305		18.5657	-7.00946
-1.86283	-7.55254		14.2385	-12.6996
18.2454	3.22679		-14.7671	-11.2689
-12.4806	-4.51863		11.9602	2.50075
29.8627	-13.806		-15.6267	-9.36279
-17.0458	-7.43573		-5.76561	-7.82708
-19.0546	-8.26466		9.90577	-3.84089
-18.7595	-16.473		15.9997	-5.92156
-25.6922	14.5651		10.7009	-8.76636
-17.4291	-14.0955		13.7832	-12.6988
-20.0224	-13.0773		13.597	-5.23038
-18.6762	-12.8146		16.2959	14.4587
16.0041	6.32833		12.7634	12.959
-16.9658	14.7685		-5.02084	10.8631
-22.2515	12.8476		10.153	14.0786
-22.676	11.0501		10.0577	13.6889
-5.30017	-0.7052		12.3631	10.8523
-5.21549	10.6117		12.9964	1.66195
-11.7255	11.5955		17.5027	2.24625
27.6603	14.1885		13.4404	2.76671
-23.2848	-18.4022		-9.72835	2.74994
-15.7247	-9.89007		9.83959	3.24081
-23.6652	-13.3548		16.2931	3.2291
-17.164	-12.8876		7.64507	2.59889
-25.9391	8.57149		15.1962	5.07513
-17.9713	14.2479		11.2799	7.05996
-25.4818	11.6642		-14.9037	10.634
-19.5318	12.12		9.68641	4.0625
-13.0758	-19.4259		-16.2524	1.72714
0.278925	12.9602		-14.5917	2.36044
-5.88292	-3.5458		12.7647	4.19834
-20.0827	3.73911		-14.7396	1.68855
7.75756	11.2298		10.3006	16.0645
32.7021	-5.34838		-14.0853	-1.30134
-26.1029	-4.02681		-9.20829	-6.85958
-18.5266	-8.67701		-16.2055	-0.475389
-26.424	-5.3445		-5.66985	3.36001
-24.6795	-4.88547		-10.1275	1.70264
-23.2843	-6.56647		-10.3605	3.08505
-17.9461	-7.00462		-15.0784	2.59083
20.5148	-5.44604		-3.74272	1.98181
-24.6751	-6.50336		-1.5157	2.62889
-21.0083	-6.45794		-3.05218	2.0689
14.3649	6.05338		5.60195	-3.99354
-13.9473	4.10019		15.121	6.13017
1.93127	-0.169658		-7.7735	0.598741
-3.85073	-17.7002		13.619	4.11828
-16.1836	-17.1614		8.14819	4.10087
10.9284	-17.5641		-1.48991	2.62957
-29.2427	-13.4395		4.74532	3.66931
23.4621	-10.0232		-5.66507	-1.68247
23.092	20.8801		-14.2726	3.90675
19.5272	-16.8006		7.84846	0.814218
-13.0752	-14.4506		-13.6995	3.30368
23.1192	-6.78909		11.9143	2.85581
21.6839	-17.1178		-10.0753	-1.76077
19.4075	-4.74191		-17.7403	2.01258
15.1374	-4.7369		-8.74476	1.31357
22.0852	14.4497		10.3584	-0.741115
23.7382	11.5761		-14.5017	1.99864
21.4302	-19.7613		13.2563	6.25517
26.1605	-19.9422		-17.8522	7.55459
21.9626	-10.1361		8.47207	1.0566
13.4994	-18.5257		-13.458	4.16214
19.1201	-15.0202		-10.6548	1.45513
20.8808	14.6505		7.89897	3.78246
16.7728	14.0067		-16.2082	1.49023
24.1998	11.5994		-9.60453	7.8078
7.09117	10.966		11.7822	4.85262
17.723	11.1745		10.0437	2.3959
8.26682	10.5704		15.5983	1.51782
-27.2478	11.6211		-7.38576	6.36211
-20.8354	11.1979		12.2408	8.86379
-17.821	-13.1563		-7.14582	1.86592
-23.9614	-13.1132		17.0914	-1.455
-18.4583	-12.1563		12.0199	1.64349
-23.9455	5.43755		19.1113	-0.921271
-18.6253	12.6512		11.503	3.24679
20.129	4.50162		19.2125	12.3989
-21.541	8.08395		9.21883	10.9068
-20.933	7.23698		-17.1301	15.433
22.7433	12.7064		12.1173	8.21297
-17.2823	5.93467		-14.9746	10.04
-16.9395	8.02332		9.99828	3.65442
-6.21343	16.5195		-15.9001	0.628297
-1.95017	-13.1529		-8.55051	-10.2145
8.15087	-9.96524		-14.05	9.88154
-2.69592	-13.4583		7.76199	-8.47079
-1.71859	-10.5168		-12.8665	-2.91066
20.2685	-12.433		-13.8865	10.381
-9.44823	-16.1464		-14.1262	6.89681
13.4233	10.9001		-5.01089	-2.89122
0.117736	-11.2585		3.66338	6.03731
28.2329	-11.2585		15.2883	1.86147
22.2499	-15.7444		10.8927	-7.69867
22.0503	18.3611		-7.96091	-7.20313
20.3093	-18.2672		8.00626	-2.05102
20.2329	-5.87779		3.65127	1.53554
20.3399	-4.88453		10.1246	-3.86235
26.291	19.4755		11.5374	-2.06406
23.3817	-5.62853		16.7815	3.04417
21.6371	-5.706		9.49424	1.2899
19.9148	-4.65111		-13.3654	-4.16721
14.222	-3.62927		14.4564	-4.29573
16.1561	20.7578		16.7274	2.70822
10.9995	-8.80013		-11.673	1.48827
8.9505	11.6915		-11.3674	-3.71633
7.68078	-11.8623		-15.6449	1.97999
-22.692	-10.0553		-13.4141	-1.70078
-15.8096	-9.2318		-14.901	-5.84173
-4.72025	9.13366		18.1289	-4.86254
-15.9677	-7.36209		10.4174	-5.14377
-8.4544	14.1123		-13.0962	-7.45452
28.5639	11.4668		10.1939	-8.92775
-22.0499	19.413		9.29096	-3.96283
-29.0848	-7.25542		-13.1786	10.5711
-22.8915	-6.48307		7.12603	-12.1483
31.0497	10.1546		-13.4676	5.82702
-23.5724	15.5937		3.49919	-1.3568
-19.9597	10.4999		-13.0914	-4.06625
-28.8027	10.8038		15.1318	3.249
-11.2466	10.1169		14.5522	-14.3597
8.54373	11.7417		-7.3336	-1.40226
-2.55976	10.5214		15.5135	-3.9838
-5.7582	-2.14717		10.7939	-2.3179
12.5329	-8.28577		-16.4494	-12.0064
-5.68657	-3.13678		13.5767	4.50794
-15.5942	11.8046		-16.9238	-5.05009
27.1607	14.8551		-9.36616	-2.87224
23.8854	16.5706		-12.4147	-6.53014
-3.95829	-20.3081		10.0605	-1.04094
19.9673	-13.0468		-16.6226	2.41018
21.743	-9.0095		8.82194	3.76018
16.1578	8.90288		11.0739	-7.23358
21.4821	12.9451		-15.8895	-6.86417
18.6446	16.0695		-14.5724	0.501111
19.389	7.23117		-3.02751	-7.89385
20.268	8.87078		-1.59469	-2.06202
16.3816	-8.95142		-4.09621	-2.39789
19.4167	6.64859		9.11717	-0.47581
13.2374	7.05781		5.8111	2.80038
19.1513	7.64574		5.38679	-3.15526
23.6071	-17.6301		-7.12021	10.7064
-18.7961	-15.586		7.36329	-13.788
16.9775	10.7387		-3.71804	-0.515691
15.4506	13.511		2.80383	11.5861
19.8738	9.94902		14.4615	-14.1317
10.121	9.09905		15.2716	-0.337127
6.52913	9.83366		-19.1234	11.2213
-0.246207	7.54067		-20.5401	6.47539
23.0068	12.8873		11.6788	-5.95729
-10.6868	-12.7414		11.4991	-5.8107
27.9868	13.4908		-14.1146	-9.68757
20.5944	9.71265		-13.94	-10.4711
18.2053	9.64139		-16.2985	-4.71649
19.0272	-8.66424		14.3673	-4.32902
18.6206	8.34374		16.7989	-3.49416
19.3852	5.70417		-12.321	-12.5205
-19.0473	9.11144		-11.9959	-6.98656
-20.5982	6.01199		15.6434	9.72893
19.9379	13.2872		15.014	1.72056
25.6515	4.16984		12.0212	-3.94289
23.9274	-9.93748		16.6698	-0.701546
9.71038	4.8435		11.6002	-3.24613
10.1972	-5.58036		14.9586	-3.61754
8.90667	-6.02399		10.4031	-2.81814
-14.1048	-16.6254		18.4305	5.0062
22.3061	-5.31052		-17.7017	0.96515
22.3143	-6.37374		16.5408	1.57522
20.9137	-16.3131		16.3515	-0.638411
16.73	-6.69827		-4.35525	1.99363
21.4763	-6.87119		-14.9094	5.9256
17.4242	4.49394		13.2988	-10.2721
-21.5511	14.3789		-16.1504	-0.439692
14.9842	-14.9819		11.1981	11.6675
21.8764	15.5296		-15.7527	-5.52018
22.762	9.91179		-16.337	-4.76144
-19.367	-12.7408		-16.9616	-11.7628
-4.20189	-14.5233		11.3493	-6.78682
17.188	-9.13933		-15.119	-6.75949
6.75847	-6.40325		-10.2636	-5.43096
-0.786662	20.8269		-17.391	-18.7656
3.01312	-9.73017		-13.0024	0.824237
-20.0223	6.2311		-10.5852	4.46517
23.7432	16.4529		-2.69415	-9.53113
22.6993	16.1869		-6.60033	-12.0236
22.509	-7.95309		3.76894	-5.23951
25.0813	10.2134		4.14773	-1.32255
21.3958	-11.0927		5.45646	-4.47088
18.3984	-12.5858		-5.82986	5.3054
19.1948	-10.7073		-10.9751	2.00972
21.6252	-15.2473		-6.57949	-12.0803
22.4799	-18.8276		2.85376	-12.6457
24.2829	-13.7056		4.62879	-12.5732
22.2574	6.9625		4.4654	4.05375
22.8271	8.84646		7.28245	1.19633
16.8638	-16.7272		9.25285	5.11197
22.8914	-10.2683		2.7326	-3.01158
19.2043	11.3287		13.0393	-1.59622
20.8305	6.69598		13.5079	-0.849647
14.7688	-4.4222		-3.53673	-0.8571
18.4356	9.68652		-10.0556	-1.13843
22.2964	19.4318		17.8796	3.51865
10.6605	-16.3263		6.30809	1.82093
9.28899	-18.3592		7.14848	-3.20734
7.82067	-5.47605		17.2246	-10.3611
22.5091	6.51201		17.2123	2.37175
25.8357	8.38223		16.3673	-4.2021
23.8972	-7.35815		10.544	4.88418
-22.1858	-6.31851		13.8607	1.70472
24.7579	19.089		13.3852	-8.37365
18.3596	-10.6654		-14.8318	-5.43897
20.2737	13.803		12.95	1.39716
18.384	5.86751		13.5641	-1.98941
21.4384	-8.95049		-18.2181	-3.7973
-20.4867	-8.59105		15.5512	-9.49467
22.4487	4.56693		15.3494	-5.18891
20.2099	9.27744		-12.1717	-11.1335
21.7124	-14.378		10.5987	3.67794
10.0116	13.8489		17.2176	3.14867
-2.52408	13.1587		-10.1805	-14.188
8.49941	-9.86541		-8.44104	-1.5589
3.54214	10.2955		13.1559	-5.63835
13.3242	-18.356		17.7074	-4.04298
12.8611	-14.3036		11.9017	-5.0684
12.6656	7.50708		18.4091	-2.6294
19.7232	-9.96681		12.0652	-6.18713
21.6815	-11.0401		15.7171	-3.52763
23.7459	-10.5911		-10.7148	-3.00353
20.3337	12.1955		9.64575	-10.9942
17.7784	-13.6152		-14.2426	2.50168
15.9792	-15.2563		11.9862	6.82132
20.8925	-12.4586		-14.6156	1.11248
22.8286	-13.1146		11.0284	5.23347
18.7802	-11.6136		-16.2335	1.03721
18.8213	12.7567		11.2572	-7.37861
10.3039	12.2457		-15.0074	-8.60144
6.59953	-9.94346		10.9864	9.611
8.6791	-17.7621		-16.1621	-0.370707
1.6523	-14.1188		-7.89392	9.87666
6.52878	-14.8215		-15.0308	-2.25607
-6.36214	-5.45469		-10.0182	-4.46841
-15.6233	-3.93477		-14.12	3.08036
23.0261	-17.6879		-8.45362	-3.66387
21.7062	-6.67275		-10.9947	3.82405
21.2706	19.8818		-12.7546	8.76281
-14.1442	-7.69549		8.59265	8.62867
18.8335	16.8731		-13.8393	5.0861
22.5185	-6.77172		3.09057	-6.99171
19.1192	-6.43645		7.95444	1.33932
-20.3327	8.32855		-6.40635	-7.99324
17.3119	4.56592		9.83929	-7.2032
21.6475	8.74698		-3.50117	-6.33033
19.2812	13.6383		7.12176	-2.18075
22.0581	-14.1098		9.54251	-5.62392
15.4642	-16.2063		5.86733	-0.633747
3.20254	-11.8024		6.29781	-10.7346
-4.09274	13.3382		11.527	1.22163
-24.8386	-14.328		-12.3442	-3.91027
21.7419	-21.1763		13.7817	-6.93313
20.6133	-11.4205		16.5877	3.3723
22.9354	-7.3947		-14.2434	4.96854
17.3183	-12.7846		11.0385	12.7203
18.1535	-5.71383		11.413	1.8473
23.4338	3.25366		14.9234	2.54497
18.9168	9.82861		22.3215	-1.73088
-19.279	14.0995		-17.4596	3.17578
-18.4263	5.01209		13.0604	-5.11651
-17.2124	5.31482		15.5901	-5.71243
-23.2741	-10.3904		14.7373	-3.82856
-19.3225	-5.50578		-12.1415	-0.751842
19.1096	-10.2932		17.8128	-4.68632
-23.9978	9.32805		11.2817	4.94567
20.9842	12.9489		13.2644	5.66594
29.0184	12.2251		-13.9365	-0.78558
19.3649	13.1489		9.382	-2.39987
8.90007	12.0998		13.221	-10.6819
13.1451	-12.4465		-12.9459	13.7157
4.993	12.0785		-15.4429	-15.5741
6.7367	-11.0075		15.7311	-12.1064
1.47596	-13.4071		9.90351	-3.47272
-3.98826	-6.76038		12.6196	-8.61059
27.2145	-6.46734		-16.1237	-2.85353
-20.2032	-12.1747		-13.2808	3.0368
-21.7017	-6.57931		12.991	-1.62467
-24.9267	-5.21722		15.242	-3.68429
-23.165	-4.84876		5.85137	-6.92488
-18.1957	-7.48191		17.5484	-4.17356
21.9132	-5.66711		-13.4221	-1.24056
-18.3161	-5.38098		11.4464	-1.54338
-12.7156	-3.76249		10.5161	-5.44254
-23.9553	4.14995		-15.2476	-4.36642
-21.0928	7.65685		9.74653	4.56419
-24.4997	9.67202		-12.3266	4.06502
-20.4142	-12.5174		-10.1322	-6.4145
-19.0817	-8.6749		-14.5383	-2.46215
-6.62609	-22.2669		11.1316	-1.47341
11.9006	-17.0638		-16.1364	-2.40009
-31.1153	3.26484		-8.00859	-7.54748
29.4217	-1.81088		-7.07271	-8.43526
26.0144	-4.8291		5.45823	7.45656
23.1719	-15.9051		11.3221	-7.93448
25.6573	-13.2998		-4.91191	-2.70199
22.7952	-15.947		1.0039	-4.16908
18.6561	-13.2454		-1.24445	-6.33033
21.413	-10.6911		-16.9374	16.0595
-19.4465	7.79332		-15.4876	11.2967
-22.7403	-14.4298		17.0845	-1.344
20.2297	-13.1476		-3.23196	-0.439088
-22.9192	-7.60616		-3.57094	5.85138
19.1375	-7.0606		-2.57453	-2.90061
19.5857	-5.64864		-1.22803	-2.54136
17.7788	4.74821		-4.05955	-5.09708
16.0108	-6.16432		-3.72642	-1.43651
-21.1178	-3.30336		-4.0236	2.20194
23.6444	-7.95127		-4.33652	2.96371
2.65592	-3.37091		-2.43773	3.67154
6.60242	-6.84719		-1.23572	-1.05779
-11.6759	-8.13333		-5.76798	-7.33123
6.87242	11.0321		-4.99353	-7.64811
4.17354	-8.17565		-3.0552	1.68161
3.37175	6.48118		-4.13075	-5.45359
6.69531	-7.65321		-0.940822	-4.17901
-2.30192	-7.07193		-3.17258	0.518173
-1.47301	-3.15461		-3.10774	-10.1059
3.46426	-1.51917		-0.845238	-12.312
-12.1419	-9.46924		-5.32253	-4.25743
-1.18897	-8.00487		-2.1984	2.58005
-2.63783	-10.1819		-3.02331	2.89904
-20.4031	17.2333		-2.34811	5.90583
-13.8213	14.117		10.1458	5.75423
12.1816	-13.2791		-15.2147	-1.95978
23.463	-4.45545		-16.3908	-2.00984
3.32258	-12.1177		-0.98942	-2.52817
-1.61057	-12.7514		-3.42284	6.26362
6.14973	12.3083		-1.1718	-2.47222
0.237287	-11.6111		4.12152	4.95524
20.6881	13.9017		-2.39406	-2.23299
-2.33134	12.3125		-1.05908	-2.72558
-7.86042	8.79273		-1.97997	-1.15713
-0.869326	-9.71436		-6.16394	-7.21254
-1.6972	-7.22752		-3.02508	-8.1591
-1.62487	11.5902		-4.63622	-11.8615
-16.4024	-6.79557		-0.79196	6.91234
13.6486	-6.12806		3.0889	2.49355
15.2881	-8.02687		-2.8428	-2.08815
13.4999	-7.38962		-2.89029	-3.49861
14.3926	-6.08646		-6.21103	-5.04401
14.8608	-7.70512		-5.39466	-4.96524
-2.03417	-5.37655		3.09618	-1.37764
11.1495	-11.8396		-0.478096	-2.19964
4.82646	12.7021		-4.21626	-1.60971
1.19516	16.0895		-4.2396	-1.7963
-5.78499	15.108		-2.91395	-4.15734
-9.6249	11.4357		-4.8667	-7.56654
3.66855	-13.4779		-3.77355	-8.9456
-16.1488	-13.3581		8.94735	-1.7969
-4.14236	-14.6405		-15.2598	-1.26209
5.90263	-12.8694		-16.0414	-10.1219
-3.00822	12.1313		-1.99587	-12.2198
1.12835	12.1663		-0.620141	-9.85226
-11.4122	14.5472		-2.07686	-12.2776
14.5037	-12.2855		-5.63013	-2.53102
13.036	-11.0684		-2.25985	-1.60558
3.5746	10.5973		-1.71089	-2.83206
6.03569	-12.3204		-7.81992	-4.04438
3.64758	-13.0706		-5.22971	-7.37016
-10.0868	-8.83911		-2.08082	7.72615
-7.22117	16.5103		-4.37707	-4.06667
23.0795	16.9135		-1.11651	10.9988
-1.46654	17.2862		-3.62873	6.85312
-9.35731	-13.9305		2.58096	6.98553
0.867192	18.8473		-0.423332	5.37821
5.25061	6.56266		-6.1087	3.44219
1.35715	-13.3481		-6.60962	-0.785916
-2.88461	6.42828		-1.44256	-1.31455
-2.42835	-5.95777		-5.0498	3.74974
-3.92171	-7.05763		-4.51617	7.96528
0.543677	3.52381		3.89421	1.0983
1.08015	-9.42956		-4.02556	-8.40427
4.30056	11.1369		4.25937	-1.30021
8.89406	3.03039		-19.6494	-1.75689
4.17067	-6.63535		-16.6791	-4.10525
-12.6803	-13.1389		-1.71376	-1.59413
2.78747	-16.3185		-1.66107	11.4098
-1.21668	19.7321		-4.28093	13.0594
29.2482	10.6554		1.22871	-1.32171
-1.49429	13.3186		8.23769	-1.61226
-7.97295	-11.7058		-4.89622	6.59372
-2.04581	-11.9222		1.3444	-12.8454
-2.25917	8.16443		1.85396	-6.65478
-11.1047	-12.2252		-3.9729	-7.43009
6.34065	6.94349		-3.0859	-4.25808
-8.99505	7.18177		2.02601	1.7189
-6.17656	5.65935		-3.43391	3.31954
-0.666353	11.4812		-2.04877	2.27967
-10.434	-6.4633		-2.7567	5.77987
4.50983	8.83131		-1.23002	2.74539
8.82054	10.0238		-1.84801	-2.47836
5.3806	13.3627		3.52478	2.03074
-0.981237	7.00911		-4.58079	-18.4244
-0.918502	7.12675		-3.88685	-5.97111
-7.73294	13.9517		-6.47534	6.77659
2.44339	13.5724		-4.76318	-12.3269
-5.01445	1.18361		5.14299	6.18003
-1.29538	-13.4243		5.45175	6.58955
-5.57491	15.5995		-4.99674	-0.866207
-3.22534	-15.8027		-15.8014	-4.92781
-3.39837	-18.5515		-17.2422	-6.63911
-16.3409	-16.5994		-1.98305	-3.10511
-7.28369	-16.7684		5.20336	-1.35245
8.45465	-17.576		-6.76206	-5.21076
2.40941	-14.9818		15.4291	-7.32239
1.30967	-16.1311		-8.04296	4.83317
9.9413	-14.1271		4.43003	0.754932
-1.80393	13.6013		-1.26295	2.42518
-14.1424	-11.4985		-3.56984	-3.61507
-6.07513	13.8175		-3.64883	-3.89252
-1.42166	13.284		-3.98775	-2.63746
-2.58063	-3.31641		1.93824	3.58882
-1.77091	-17.6467		-4.15396	3.16944
-1.52275	-16.8371		-3.75575	2.67659
-15.1768	17.7643		0.301824	6.11533
-12.7151	-10.4776		-3.37405	8.89516
7.00918	12.1833		2.7766	9.84511
5.33646	-6.25286		-1.9879	7.16477
-8.04967	7.48067		2.92319	13.7085
22.4618	-11.0318		-1.78004	2.83918
-1.21546	-7.55573		-3.41511	-1.99878
-15.063	-12.901		2.44119	-4.27881
14.9763	6.86551		-1.12944	5.67667
1.65568	-12.8898		-3.80843	4.55864
6.11596	6.63522		-20.6434	2.20499
-1.87343	-13.4077		-17.9395	2.6902
-1.1108	9.03245		-4.54228	2.6252
-3.47715	-10.0839		1.30095	-6.76104
-14.9438	-16.2459		-2.15012	-8.34583
-10.7121	-9.78709		-0.63801	-8.75097
12.7432	7.59597		2.68007	-6.17623
10.5099	10.4847		-2.82023	7.56694
-12.5312	-1.89647		-1.92153	3.4987
-13.7355	-15.1536		0.989394	4.02805
-4.80006	-19.4503		-2.11805	2.07599
-17.6782	-14.1868		-4.32254	2.40451
-2.01232	11.735		-1.19708	2.7013
-1.01586	-3.74948		-3.19715	2.91339
-4.15196	-8.64978		-0.444711	2.85208
-2.19174	-3.71507		-2.81087	3.81113
5.65089	3.63538		-1.98633	3.24581
-2.84436	10.8304		1.78505	5.4159
4.01203	5.15555		-4.414	0.935635
-2.32206	6.16812		-1.69213	-8.14436
-8.79292	4.87567		3.94891	-8.9671
-0.931485	7.50315		-2.16769	-3.12495
0.855677	7.06203		-2.95641	2.63616
15.0142	5.37116		-0.636692	-0.764715
-11.2635	9.80752		-2.44135	-3.47367
11.2391	14.0409		-5.88167	12.6151
14.7889	-2.55244		-14.6159	-8.83827
-0.464239	-6.14452		-1.81738	-10.8442
-15.0756	-12.8767		0.892864	-10.9851
9.16235	13.2807		-4.80227	0.56106
2.2026	12.1636		-0.584464	-9.14095
-0.460549	8.35224		-2.49074	2.78776
-11.269	-11.8604		-0.508469	-7.91749
-1.48466	16.8255		-3.64674	3.01156
13.7123	16.7683		-1.38097	2.32041
-6.87729	8.57972		-3.05395	-2.65691
-7.7741	-10.879		-1.06888	1.17707
6.56087	-12.7825		-3.96138	1.02701
2.06209	-19.8295		-3.50022	0.527415
-8.30669	-17.638		4.47239	-20.3903
-14.8022	-8.56578		-4.61308	-10.5974
-16.9085	-9.65814		-2.95656	-5.47397
-14.3862	-14.3309		3.86248	-22.0698
8.94458	6.89379		-11.209	-14.8111
11.1988	-10.7305		-8.07061	7.3193
18.4757	10.426		-17.3698	-14.4735
-18.6033	15.9515		-16.9273	1.55454
-9.2618	-7.24069		-3.52174	5.40449
-15.1213	21.8062		-2.64219	-3.36211
-14.81	10.3455		4.25158	2.49556
-18.3505	24.103		-1.94952	-6.5169
-6.80086	-19.7459		-1.87212	-12.1344
11.4978	-24.4842		-0.0923122	-10.1261
-7.97856	-6.1109		-3.84953	-7.65339
4.404	3.00724		-1.8959	-2.44514
0.991224	17.6567		-2.2308	11.6487
-1.40431	8.71345		-1.59821	-12.6574
12.0394	5.79821		-3.10738	8.23306
3.4104	6.6669		1.50306	0.781204
27.1875	7.99151		-6.99219	2.56188
-11.5735	5.05518		2.75329	-8.99927
17.2164	4.93621		-1.64181	9.24974
-2.44821	10.5949		-1.95952	-3.94611
-4.04096	8.53406		-8.19501	-4.8964
-7.92087	-2.67499		-2.5498	-3.75675
-9.11784	-6.58487		-1.00523	3.01983
-5.63982	-17.9227		-2.41611	-7.8938
9.0191	-24.6241		-1.50037	13.358
-4.4354	-22.6282		-3.8992	2.74904
-8.67442	-2.51833		-3.94304	-31.3325
-3.52895	-3.4377		4.63973	-12.4598
-5.93209	-12.9017		-13.4543	-10.2408
-2.50535	-3.46197		-16.6376	-15.35
-3.67133	-3.04581		-2.11688	-19.2698
-3.11817	-15.0873		-1.18949	-5.05714
3.68668	-4.13643		1.15666	-14.1909
5.46839	-22.5224		-2.25911	-17.2753
18.5547	-1.74654		-1.75819	-17.8038
-12.8666	-4.70473		-1.48328	-20.2525
8.53589	11.7683		-3.09084	-15.1257
6.97894	7.71311		-5.39484	-5.89666
6.68263	-3.79593		9.37225	-1.95455
8.45823	-17.3605		-4.76384	-3.25616
1.78716	-3.79487		-3.75489	1.71311
-12.5843	6.84528		-1.49705	-4.84999
-6.02771	13.5778		-1.82682	0.0616642
3.46376	-17.6261		-1.22309	-6.38583
-7.70891	9.23734		-3.34862	11.3282
-7.49147	12.6808		-0.688728	9.78625
-2.49065	23.9386		-2.84547	8.24953
3.03987	-32.2732		-6.99754	8.26116
1.24513	-29.6245		-4.51417	1.07205
8.43336	30.9301		-4.83142	0.8256
-22.5645	12.5323		2.43236	2.92834
-2.20236	2.64149		-0.619712	-1.84359
-20.5283	3.31063		3.96705	1.63838
-15.9796	15.11		-13.2587	1.23267
11.2781	-15.9611		-21.7102	2.15215
-2.26548	-13.4483		-17.9107	-0.712587
-12.725	-13.3663		-5.26732	6.86316
-9.50155	-3.47853		-9.0352	6.66327
-4.02497	-8.40793		-2.63327	13.9359
-8.45244	5.07265		-10.9164	-6.42879
12.2648	12.5285		-3.96827	1.50725
9.82003	14.0969		2.00468	-9.78184
-2.96238	5.62538		-2.20628	-17.5475
-9.99747	17.7649		-3.57829	-17.8445
-4.95573	13.2689		-11.6214	-7.32587
13.3995	6.33461		-5.05333	-17.1519
-1.93191	23.0351		-1.27489	-14.2005
6.60988	21.0389		-0.609749	-16.109
3.79076	14.791		-2.30602	-11.7413
8.49559	6.21337		-2.64164	2.2651
-17.8125	17.2841		2.1805	20.5079
-13.0177	3.03232		-3.21594	18.6734
2.93702	12.8706		-1.46887	-15.564
-7.52148	10.8926		-3.53484	2.64222
-15.9506	-6.35279		-1.86566	-9.39641
-10.3889	3.70338		4.7871	-3.82113
-5.45414	6.97566		-2.03805	-3.55042
4.94463	6.14396		-4.31916	1.48326
-3.65222	-5.53499		-4.55592	-5.34243
4.94657	-3.84628		3.50074	1.81167
-3.16327	-4.45094		2.68462	13.2028
-2.9134	15.4476		-1.77022	-13.9573
-1.53555	10.9013		-4.35713	6.38736
8.29346	-10.136		2.38969	2.2695
-2.66248	-20.0241		-7.50232	-2.84076
0.773292	-15.7645		3.38022	-1.59514
-4.11257	13.6251		-2.60479	-0.374862
16.5774	5.88499		-1.06162	-12.0844
-10.9666	33.7352		2.57442	-18.1006
7.8208	-9.83785		-3.41799	-21.8077
3.78502	16.8223		-4.79565	-16.2778
5.91048	17.8599		2.15754	-5.77311
5.21723	-10.0727		-1.07715	-2.37404
-20.2138	1.69826		-4.73741	14.4034
-13.9407	3.56589		1.76964	7.67581
16.6209	4.3403		-3.89157	-2.60161
-21.6214	-10.6244		-1.92721	-5.8529
-2.55213	-0.828408		3.38965	-4.22536
5.69882	-3.2386		-2.26152	3.58807
-2.24861	-6.69242		4.71744	-6.18211
10.6083	7.25438		-4.15398	1.97618
-1.43948	-10.7486		-6.46998	-12.957
-1.02149	12.0717		-2.8231	-10.4609
-1.91531	-9.84366		3.67877	-0.174173
-6.12986	17.1111		3.68717	4.59312
2.53945	-1.29541		-4.87335	-3.5473
3.08375	2.00639		-2.59659	4.73304
2.1333	0.745145		0.572251	14.3537
14.2963	2.46129		-3.80667	-9.79221
14.3892	0.612041		-1.05474	6.68526
-23.0785	16.3249		-4.91107	15.6017
-0.434456	-12.0468		-1.46692	2.53046
-3.67286	1.7344		-2.54529	12.4168
-25.505	2.53475		-1.07559	-6.67455
-6.48555	-14.6738		2.91624	5.63419
-1.52666	-14.1489		-2.18701	0.172399
-0.547795	7.74407		-3.71092	7.12244
-10.2272	-3.11289		2.18433	15.5433
-4.85238	-9.51123		-2.93192	21.4865
4.44551	-10.2066		-0.541278	7.1134
-20.2358	7.94878		2.62484	20.6163
-5.6907	7.55823		-1.62572	-8.6565
-3.86741	3.55121		-2.2203	13.8487
-3.28746	11.2839		-3.04574	23.8532
-17.6262	14.7039		-4.34456	-14.6084
-16.1932	5.49119		1.99771	1.46189
10.491	-12.5209		2.79533	1.85119
-7.6252	-16.2773		-2.46907	26.1793
4.86085	10.771		2.67244	15.046
-37.8768	-5.23335		-6.24917	-11.7274
-17.7991	-13.5044		6.0587	23.4611
-10.2241	-28.3593		7.59501	24.1257
-3.37477	-2.42987		-17.5718	14.0109
-9.84292	-12.0593		-11.7308	-4.93701
-2.73814	-1.59296		14.8566	-1.45594
5.97438	-11.4143		-0.732574	0.542276
-3.65204	-2.84585		-4.63966	25.0005
-2.67835	-2.25147		-1.1406	9.66871
-6.63847	-11.7895		-0.757565	22.5858
-3.31959	-3.06552		-14.5979	-12.5435
-16.0056	-3.60608		-5.64305	-21.3799
-15.6244	-7.11908		-1.06558	-8.04623
-13.7719	-4.13235		3.60677	11.7404
-14.6849	-5.75683		-2.20953	10.389
21.0535	-6.13772		-3.65376	-17.0176
-5.65758	-1.73033		-4.62199	-16.7749
-5.2689	1.39419		-1.36185	16.7237
-1.73324	-1.30669		-2.4452	-13.0927
-12.9278	1.32307		2.97311	14.2389
-3.67275	-12.8505		-0.938959	6.95915
-8.72858	-6.37118		-2.23917	-11.1352
-0.982338	10.203		-2.42396	10.6279
-13.0067	14.7658		-1.17487	3.04507
16.6177	12.5771		-1.49855	-0.836115
-2.59451	-11.2226		2.93864	5.90706
-1.94322	-4.10435		-4.82995	11.7369
8.49465	-12.6262		-2.09947	-0.761664
12.7659	21.6487		-2.96387	15.8122
-5.06102	16.6053		2.90251	-13.2258
10.3042	2.85378		-2.33079	-5.82283
-2.5823	7.72808		0.668477	-11.1111
6.52379	5.09882		-2.10824	18.0365
-1.2156	19.9771		-2.82624	-12.7151
-8.79424	-8.23086		-5.6521	-17.3555
-3.52374	4.02396		-8.05301	1.42151
-2.58103	2.99433		-5.00714	-2.50632
-2.98338	7.12363		4.22875	14.9128
1.99022	4.8276		14.089	-16.3559
-16.7912	23.9115		3.31428	-13.64
-7.47266	8.63805		-18.4554	-8.21687
-16.0402	10.2553		14.3614	-20.9418
14.8315	8.86305		-3.71117	-16.134
2.00156	-4.57163		8.23369	-7.51986
2.37641	-6.75856		-7.77229	2.24591
7.35476	-13.3333		13.9926	-3.19503
-12.9714	12.9963		-3.55778	-3.35003
-6.08664	6.55321		-1.61956	-1.69039
2.66765	8.35805		-2.97081	-5.14098
26.5068	14.2302		-1.88203	5.24332
-2.8342	11.034		-11.1818	-19.0694
-12.2253	-16.5332		-3.07178	9.19304
-14.3651	-32.1199		-1.08868	-14.7395
-2.43948	-37.412		-3.84336	-8.5791
-3.52688	-1.95404		4.74767	-7.90135
-17.9371	17.4209		-0.954325	-5.20179
-2.78815	-2.74864		3.94365	-5.45926
-0.329952	-2.06439		-4.1548	0.9489
-2.99526	25.7271		-1.55093	6.66117
6.25199	-19.3531		-3.07846	10.6881
-11.8462	-13.4576		-3.76927	7.41414
-6.98233	20.4477		4.64157	-11.3236
4.21223	3.73907		4.72154	-17.6015
12.5321	19.6229		-4.66606	-16.7858
-5.0168	3.7713		-5.57995	-16.6081
-15.1029	-8.66517		4.19865	16.0801
-15.7907	-2.57953		-3.90245	-14.2747
-5.69694	-10.9361		-4.37862	-16.8446
-10.957	9.28964		5.25613	-18.3278
-1.13988	-9.12845		13.5479	-11.3125
-1.39932	-4.91288		12.6796	14.7707
-5.88594	-5.93445		-18.5011	1.45984
-9.87303	-2.60152		-19.326	-8.39676
-12.5237	4.23414		13.9837	-5.91733
-8.18337	-5.96828		-1.15749	-5.73797
18.3547	-14.5641		-7.63439	-2.89843
-3.03758	-1.4209		-3.85728	-0.257837
8.64339	-2.15105		-1.82355	4.84969
-10.0425	4.34961		-2.88657	4.71218
-7.4967	-9.76858		-2.89184	-7.16093
-8.9759	-1.88495		-3.13819	2.28277
-4.96128	7.36922		-1.76073	6.93504
-6.37703	1.87991		-5.64441	13.4045
-13.9115	-5.96659		-2.92999	-13.5856
-8.1503	-4.33728		-3.36774	-9.87707
-1.62266	-3.5415		-2.30832	-5.49998
1.90861	-7.59399		-3.8524	0.902468
-6.31307	-4.68881		-9.36226	-9.35771
-1.17718	-7.65197		-0.914559	17.4425
-3.06579	-10.4669		-3.65766	-7.22473
18.9409	-7.65026		-0.577862	18.5966
-12.1862	-3.98744		-2.35952	-10.4395
8.70918	-6.31534		2.21855	6.56197
-5.30898	7.08026		3.45157	13.6285
-7.61039	4.3106		-7.67959	-11.866
-18.3716	-3.4836		-2.29648	0.397198
26.3089	-4.58618		1.5623	6.58992
-12.8699	-11.67		-4.67431	4.21031
-3.18873	1.78168		-7.02283	1.97537
24.65	-5.38259		1.81912	2.5106
-10.6762	9.58489		2.53557	15.5027
2.90817	4.14536		-2.93967	-7.53558
4.70284	-3.93647		-1.33317	5.38084
-7.66484	17.3794		3.48266	-6.7965
-1.13778	-4.82603		-0.784071	-4.49218
7.23269	-1.55323		2.77029	0.811852
7.91011	-5.64716		-1.3554	-9.04958
-10.3087	-6.01134		-3.34897	-2.09397
-20.5374	-4.93193		-5.31737	4.94614
-14.5395	-1.17806		5.69247	4.2011
-3.43779	-2.70841		-2.04384	-4.99956
-10.5852	-2.84999		3.69499	-6.15084
-7.70435	-3.12466		-3.80418	-10.5178
-5.59465	-8.2381		-10.983	1.62205
-5.0177	-13.6298		-2.37129	-8.61502
-2.14931	-10.4699		-15.0543	-6.31448
-12.8189	-6.27399		14.6244	-6.58793
-2.98709	9.98625		8.73388	4.79565
3.85787	12.7302		-5.14662	-1.79221
-5.62746	5.53331		4.84457	-0.496662
-3.30988	-7.71153		-4.44903	2.81579
6.36884	-8.91851		5.40587	-1.90558
-5.15537	8.82706		-3.4654	2.54338
-3.8203	7.97166		-1.77369	1.97702
-1.81596	3.34197		-5.57838	-1.56305
13.7161	0.439293		-2.79985	4.38157
6.82771	-9.18541		7.62193	0.981067
-3.80038	-2.77921		-6.16089	-9.63233
-7.51862	-8.03543		-0.348293	-4.59057
-18.9836	8.68561		-4.08973	13.6385
-8.29899	-3.58		-4.36377	22.0112
2.89701	-4.42549		-2.00718	17.5418
7.39804	-4.23301		-1.73491	19.791
4.62618	9.87128		-2.58314	1.4027
-24.2062	3.21463		-3.79301	11.1705
19.7461	4.28474		-2.03007	-13.5537
3.92057	-9.37186		-2.79922	-17.1111
14.8336	-6.32343		7.05694	-11.5198
-8.15648	7.6298		-2.20854	-17.994
-14.7299	-10.5652		3.03939	-16.7579
-4.14254	-7.12985		3.68614	-16.1889
-3.01609	-7.39171		5.86543	11.7885
2.17899	-4.14247		-3.41198	1.36285
-8.45418	-2.065		-13.1147	-1.46303
-1.09726	-6.48212		-7.70788	-3.71121
-5.30942	-9.84097		-13.1783	-0.367012
2.22174	-4.94071		-1.57808	3.86478
25.9909	-3.17781		-3.43291	2.90536
5.20003	-8.5659		-3.92717	1.5686
-1.92402	-5.83402		7.38323	-7.58421
13.3249	-10.5031		-8.28428	3.00692
11.3364	-8.20224		0.978275	14.7368
2.15111	-3.64514		-3.89902	14.6569
22.905	-9.48189		2.38374	14.3808
-1.89682	-10.0399		-5.43167	6.08921
24.6908	-9.50882		-3.55425	-16.6267
4.16205	-5.86967		-5.21408	-0.543494
2.89857	-8.27108		2.51541	-17.8794
3.76632	-8.33422		-4.30946	19.8392
13.5793	-8.17426		-1.02117	19.4943
-3.88018	-7.98716		-3.90091	-9.92117
-1.15657	-8.57457		-2.39086	-15.2772
-19.1062	-9.49262		-4.46385	-0.693159
-14.0048	-9.6629		-1.71059	-0.732731
-12.4973	-4.54941		-2.7702	0.362318
-4.16126	13.1162		-1.52559	-30.3362
-3.08583	-3.35715		-3.29533	10.8699
16.9035	-3.53394		-6.01483	0.816888
1.3359	-2.32044		-4.31711	1.31007
-13.823	-3.72139		-4.12753	11.9651
-12.8545	-5.2224		-11.1125	-9.55888
-16.231	-7.08143		-13.5202	-12.1682
-4.06412	-8.45799		-17.1933	-9.35734
-2.98243	4.52671		-2.44885	-11.6892
-3.11647	-3.73771		-2.96014	2.45436
-2.12216	2.45562		-3.79406	2.73277
-16.7122	-5.90349		-2.73825	-1.65816
-9.82141	3.70176		-1.74733	4.2414
12.5547	2.96283		-3.08541	2.24523
-5.76655	-2.71936		-1.7595	-31.8891
6.07252	-5.46054		-3.77984	-1.59638
8.57636	-6.97049		-5.92916	8.41408
15.3294	-8.88494		-1.44364	-9.06766
-0.715244	-3.61305		-4.9342	-7.20121
22.9427	-6.56872		-4.77405	-4.65271
-10.8067	-5.54163		-4.04958	-14.4229
0.838178	-4.2859		-2.5545	3.69547
7.77854	-0.336445		-2.31299	-1.75654
-3.17842	-4.06342		3.76668	-5.10527
-3.11694	7.34913		-1.79539	-21.0814
4.36431	9.46108		-2.54675	-20.0151
-2.29606	8.476		3.71493	8.84258
5.94241	6.16192		-5.53505	-11.4542
-2.26183	9.6882		-3.20321	5.06796
18.1884	6.68403		4.20908	-8.93234
-5.91116	-5.47328		10.6024	-9.51767
-7.94342	3.73577		-16.3207	-7.60478
14.4487	-3.71557		-15.8074	1.7418
10.7035	-7.77662		-1.35724	-3.65673
5.00185	7.8998		-9.41151	-3.19843
-6.74722	4.14611		-3.29776	-2.80551
-15.1997	1.78671		-2.66517	-14.1935
42.4371	5.56429		2.55258	4.94648
-23.5871	2.25171		-2.6525	-5.6938
-20.669	-3.16954		2.67588	-2.82359
-12.1874	-4.5799		-4.20589	-1.95092
-1.85437	-7.68592		-5.87645	4.81864
-18.4512	-2.15426		-1.56603	-14.3784
-2.59835	-9.46179		-6.0344	-21.0761
-5.60967	-8.61675		2.45393	-12.9885
-2.92074	3.99964		-0.438342	-6.40277
-6.8324	-2.53188		-3.05987	-7.36004
21.2358	-4.33617		-3.71449	-7.90319
-14.9975	-2.81922		-5.51673	-10.1373
-10.2509	1.26033		3.31031	-3.39206
8.95711	5.83962		1.72945	-14.2192
2.66264	-22.2024		-3.38656	-11.9583
-12.0279	7.06533		-1.42539	-13.287
-6.272	-7.27154		-2.51067	0.982279
25.1772	-10.1979		-4.93748	-10.228
-16.8842	-8.01059		3.07897	1.74073
-18.9558	-5.96277		-12.177	-0.312647
-8.01118	-5.6042		-16.8538	-8.18609
13.7495	3.59654		-18.3944	-12.7003
-8.87325	-2.80861		-2.65665	-17.082
-0.916038	-6.43617		7.44639	9.64843
-15.5756	1.55997		-3.62185	1.0843
-4.61639	-7.54993		2.57247	-14.5311
-2.32436	0.496223		-3.08369	-21.3833
-2.01822	-4.43358		5.52017	13.4268
3.21091	6.27484		1.11773	-7.51273
2.37958	6.61658		-1.89362	-5.99458
3.84323	5.19584		-2.35826	-3.70709
-5.22886	-4.43636		-2.83439	-16.5444
1.36962	-10.7522		3.62052	2.87733
-21.5564	-7.98566		2.92921	-28.7345
-11.8337	3.053		-0.642862	-0.652073
-9.16761	3.1011		-5.11506	-10.1431
-2.30499	-10.5207		-0.442745	-13.0169
14.9452	4.41939		-5.71777	4.17155
-7.83181	-6.03805		-5.98532	2.07199
2.82277	-8.382		-2.28789	2.08134
9.52414	9.6196		4.09043	-7.30268
-0.738204	6.43542		-1.76597	3.89589
3.5166	9.26033		-5.4458	1.01134
-2.41445	-7.94711		-3.8346	5.50484
12.0301	12.708		-5.45953	1.47969
-3.15365	10.0098		4.27801	2.49009
3.04859	3.47869		16.8322	1.6976
2.06027	-3.91267		-2.15797	23.1617
9.54004	6.90086		-2.75998	7.85232
11.1256	-8.18517		-2.22454	1.34577
-13.5255	5.17543		-4.70638	1.39198
-7.42483	1.99623		-3.96344	-27.7018
-8.13752	1.0854		-6.41587	15.3629
1.06237	-1.83396		-1.66675	15.6015
12.8382	-5.48395		-1.64213	-15.9463
-11.5007	-3.20501		1.43225	-7.99287
-16.0348	-1.23628		-7.35767	-6.40487
-13.8359	-2.2327		-6.10425	1.54422
-12.7522	1.36132		-1.41375	-6.02367
-9.0314	1.49383		-3.85555	-7.58633
-20.4901	-7.32749		-0.599507	3.13992
-14.0824	3.20207		-1.76677	-5.01064
13.6216	-5.00486		-1.08896	5.09311
-2.82739	-0.696962		-5.26787	1.68699
-7.37083	1.16464		-3.10362	-26.7172
-7.3081	-4.818		-3.05236	13.4191
-1.27215	-6.66642		-5.08618	11.0248
1.49446	-2.16126		-5.28639	-12.6966
8.37483	-2.86625		-4.77582	-5.44646
17.3671	2.37468		4.95225	-5.43494
4.31687	3.64577		-22.6847	-2.32071
-19.7722	-3.06976		-2.69347	-5.87047
-3.86982	7.41988		-11.1141	2.02079
26.5813	-9.54807		-5.48665	17.6534
16.9228	16.6849		-3.04936	9.27643
4.10215	-8.43909		-6.90443	3.87349
0.72958	-6.65194		-2.49498	-10.2316
-17.4203	-7.83241		-3.28915	4.16575
4.50927	-6.45506		-5.26206	14.2135
3.30724	-6.35665		-7.01458	5.49852
1.3951	-2.31164		-3.67763	-7.0647
-1.89299	-8.67653		-3.00902	4.41997
3.00353	-5.10696		-1.51127	-20.5223
1.54238	-7.6899		-1.73458	16.6549
-0.816522	-7.76167		4.47556	0.587755
-2.33196	-4.65717		-2.56532	-19.7424
-7.90869	-9.45769		-2.12828	-7.54521
-1.41281	-6.26918		-5.08642	-10.3431
3.30397	-3.39326		3.28576	-3.73754
-14.5227	-7.38981		-5.718	-1.02319
-6.99854	14.2273		4.86375	14.9992
4.75333	9.18086		-1.1679	-12.8719
-20.6138	2.74222		-3.28946	-18.2919
-8.13065	3.18361		-2.54082	-13.9944
-8.55568	-3.09211		-5.42454	20.0619
4.24819	-4.24729		-5.31749	5.98721
-23.0872	-6.66435		0.823843	-8.14517
16.7281	-9.96575		4.98878	13.6595
-14.3326	3.53938		-18.7915	0.565923
-16.0106	3.09086		12.9106	-7.17576
-2.6011	-8.55807		-0.814058	-12.7474
5.5208	7.35461		-6.64811	-7.59892
2.91604	0.686168		-17.4507	-3.20598
-1.55011	1.87834		-4.57628	-12.9122
7.70702	-0.778562		-4.39752	-19.3824
-3.55411	-2.19656		-3.0161	-13.5258
6.61698	-3.96065		-3.89003	-15.1772
-2.85023	1.16691		-3.56748	-12.7258
2.7147	-1.27451		-3.78017	-13.9691
-5.3332	-1.04338		-2.90924	-4.47972
-7.32833	-2.95877		-1.45239	-10.3808
-7.0572	-5.00083		-3.62634	14.4485
-5.75462	3.13453		2.85206	-16.6123
-9.89109	-9.82532		-4.39559	15.2547
-13.7072	4.10989		-1.88813	-14.702
5.66994	2.75094		-4.27829	4.43001
1.29834	-4.90963		4.33766	-14.8226
6.84008	-4.60597		-0.0227809	-12.085
-6.13553	-8.28304		-5.31904	2.57036
4.60729	8.79825		4.45727	-0.799683
-3.37748	3.70601		-4.17817	-0.523704
-20.1572	4.67573		3.85785	23.9947
-10.2468	-8.41916		-17.6059	-8.36846
18.3316	-9.73688		-15.018	-7.4499
17.5273	2.22386		14.0388	7.95746
23.2731	3.22669		-3.88145	12.3704
12.898	-7.6933		-10.9582	-19.8852
-3.59391	-12.9793		-1.44401	-8.86524
1.43041	-4.80386		18.5692	-11.1308
-15.7968	7.72391		23.0721	-7.82159
-1.02783	-3.76069		-2.46797	8.91755
-17.2698	4.2151		-7.20814	-1.03
4.82848	-5.70153		-3.01007	10.2822
6.85756	2.52519		-3.30827	-15.5928
-11.2786	4.14245		-5.85977	18.6805
5.3423	5.56682		-18.6533	15.6251
-6.10829	-17.0003		-4.68703	15.0512
6.8041	4.50285		3.38535	10.5174
-6.2783	4.85908		-4.83211	-1.7059
-5.28147	-0.885212		0.919948	-6.97881
-4.50271	3.85949		-4.34168	8.01283
-3.65601	7.90761		-4.79438	-2.75905
-4.83744	-6.87262		-4.10459	-4.50536
2.66681	-6.01219		-4.28118	-2.45637
-1.27555	15.061		6.89566	15.3165
3.20752	2.61139		-0.782559	-15.787
5.37147	2.65581		-3.47809	-16.2211
7.85823	-2.2768		-3.18811	-16.7743
-6.56273	-3.52657		2.49486	-9.3829
19.2999	-3.32295		-4.17395	-0.532828
18.495	-8.48347		3.72196	-7.02357
-4.65833	9.78772		13.6744	2.56633
-3.62047	-11.3443		7.74261	7.34838
4.40954	-8.93981		11.2311	5.54692
-14.5834	-0.596545		-7.01053	-6.93079
-14.4824	-10.5806		10.9993	-7.07643
-15.7538	-1.19358		-12.4609	-15.1391
-3.18127	7.06119		5.74035	-16.3082
6.10634	8.26256		3.41681	5.67156
4.00553	6.56132		-9.84624	-10.7313
1.66087	9.13889		-10.4863	-12.0502
7.16482	3.537		-13.0248	-12.2625
3.85808	6.88891		4.41356	-1.92713
1.38254	9.08998		4.85997	6.57953
-20.6124	-6.96838		-10.0645	-1.53937
7.11643	6.25829		5.00755	-0.554898
-2.80212	-7.3057		-6.18081	7.07746
6.46375	5.81705		4.03799	4.23519
-4.04479	1.16656		-4.28643	2.90328
2.16001	2.2205		5.53592	2.44224
2.65657	3.13458		-2.78364	19.0472
-3.38505	-7.50358		4.91563	9.01251
5.66951	-16.1103		4.16111	-8.86954
-6.84058	-2.47887		-2.42618	-8.44772
-11.7151	2.47152		4.2481	-3.53628
-0.935943	-0.529228		3.89478	-0.372116
6.64611	7.55887		3.03022	0.829959
-4.13417	4.34682		-4.55525	-8.24506
-7.41404	-7.5963		-5.57319	-32.073
5.01864	4.38588		2.73404	-27.7014
3.93608	6.26715		-3.83642	-17.6824
-8.56413	4.91576		5.70494	-14.3496
-1.26878	5.68339		4.57565	8.6491
2.01102	1.60987		5.88809	0.319572
1.99071	2.62905		-3.03031	4.35757
2.15013	1.69227		3.5136	-15.6949
23.9147	2.66574		-4.64468	-14.3545
-16.5256	-4.94927		4.23369	-10.8102
17.667	4.53839		-4.7318	-8.49651
19.0286	12.8936		4.96525	2.15196
17.871	11.7681		-3.75701	-11.3077
17.2006	-17.2066		-13.7402	-10.8522
-2.45868	-4.1923		11.579	-1.37952
-12.0467	-1.65302		-9.99219	-11.3724
-3.48987	-3.06669		-13.5804	3.47477
10.9059	-6.87084		-11.3075	-1.37891
-14.355	-9.75825		-6.71449	-10.5543
8.76431	-1.81944		-5.06853	6.16123
4.22404	-5.12637		8.29653	-9.41561
-5.60001	-4.90431		3.98167	-7.64922
-7.54762	-7.17144		-6.56594	6.5317
-7.31069	4.99314		-6.70836	2.4852
2.3812	-4.12431		5.56755	-12.3283
-5.6676	-11.1333		3.15814	-15.1912
-4.0585	14.7358		-4.33961	-13.829
5.79482	15.3951		-8.66811	10.8722
2.36844	1.69343		-7.39721	15.1359
3.45428	3.89138		-3.33197	-13.5767
5.96465	1.92055		3.93599	19.1658
8.14799	4.28019		4.4459	-3.09107
20.0099	5.44146		-2.78512	10.6169
21.587	-5.64332		-5.15422	8.8103
7.97343	-2.53343		-3.84522	5.89621
17.9238	1.63519		1.99634	1.31093
-12.254	-4.10728		-7.43961	1.93204
12.7887	-5.1815		8.43434	0.652319
3.91434	-4.52817		-4.62639	-9.72227
-2.33004	-11.3245		5.08195	-3.04608
-3.06896	-7.82613		-3.09287	0.314806
-2.24873	-8.77227		3.84144	11.5146
25.3582	4.50847		-6.16523	2.14006
8.88264	5.09595		3.59088	2.42455
-6.06279	-2.56365		5.54533	-10.377
-4.45974	-1.04462		-2.79669	13.8898
5.9272	-6.80392		2.29275	2.19742
-6.48364	-16.6236		-4.04153	-0.748244
5.44866	5.82661		-7.3067	-3.49069
-0.538138	-5.16588		5.71824	13.8467
-4.42603	20.5683		5.13307	-9.20808
5.12154	-6.9704		-14.3855	6.75083
2.05376	14.4166		5.06621	3.15697
1.40911	14.2749		13.8583	-7.91386
7.43433	-9.88855		-15.6095	-10.5152
-12.009	-8.89965		-6.54483	-13.6828
8.88684	6.79383		-2.84955	10.7206
13.1446	-8.54861		-6.73945	-13.4928
14.5083	6.79905		-5.50492	-10.6235
-2.66049	-3.84666		-10.583	14.0381
14.1024	-1.80796		-4.92404	-11.5011
17.1252	-6.23927		7.50926	13.827
4.41838	10.6955		6.92758	-17.7225
-9.80608	-2.12039		5.03954	6.91329
5.53734	-7.42461		-16.7569	10.156
7.44297	6.10633		-3.75606	-14.4687
6.87545	-7.68159		2.98122	6.98795
3.29908	7.49178		-9.90309	-3.31782
5.30949	10.2492		5.65079	21.2424
-5.2585	9.53278		-3.02911	18.7612
7.82245	2.11842		-9.33725	-7.4952
4.40986	-6.32136		-5.97099	11.6966
-2.46404	2.71781		5.91613	10.9692
4.81067	-15.9634		-3.98712	-8.5603
4.47531	5.17278		-4.10721	-12.8255
1.35031	3.79426		-4.503	11.6273
-4.0508	-1.98735		-3.72574	-14.2403
3.42442	4.51625		5.23096	-11.5525
-3.73962	1.29405		7.47561	-7.08328
5.30341	-4.71047		8.19882	13.5228
13.3292	-2.59569		7.63561	-10.9452
-9.80296	-8.59514		14.334	2.47305
9.62898	8.06896		-3.93369	15.0226
9.64625	-7.45726		-5.92477	-16.1239
-7.18504	-2.78894		-4.28443	-13.9104
5.99727	-6.55826		-2.75582	-0.50362
-10.6873	-9.90663		-2.90953	14.0688
4.442	-8.4488		-5.32909	14.2905
2.65233	16.3181		-7.74779	19.9827
-5.34079	-8.4809		7.84405	-9.65585
-2.46441	18.7861		-4.44807	-12.1273
-3.68089	17.9538		2.91991	5.39497
11.8523	5.52122		5.68678	-9.03704
-17.7858	-3.06781		9.66941	15.077
11.9464	0.699319		-7.13584	13.1076
17.8574	5.50274		-8.1039	-1.83742
3.37133	7.3226		1.87398	-13.3651
13.3349	6.37601		3.54259	-1.38872
19.916	2.60012		-10.3643	-4.70688
-2.97462	6.35961		-2.95672	-2.86017
-12.6999	-19.8677		-7.56147	19.8813
9.61923	-2.67827		-6.67632	-4.41971
-8.27242	-6.80317		-2.66198	-8.48137
-4.23708	13.1595		-7.08465	4.54322
-6.61033	11.5724		2.87991	1.94658
8.84893	-11.7007		-5.47438	-11.3995
-1.5042	-11.4842		4.85006	-4.94802
3.41858	-2.38892		2.62273	-3.90762
3.53258	14.9604		8.49339	6.0388
-2.06537	-3.67074		-4.71544	-14.3314
-3.87828	-2.45843		-12.3797	-6.02863
-7.80054	-2.3331		-5.55704	-1.93191
-3.71955	-5.21196		-3.89296	-5.6748
18.1836	-9.49274		-2.82316	4.42095
13.7056	17.0834		-6.4496	0.761331
11.5301	-8.48444		-6.57136	-12.0027
2.32422	-6.53213		-0.184571	-9.67456
9.07608	18.8997		-3.67644	11.5553
10.9307	-11.6923		3.3663	-1.13118
11.8664	-8.45533		-3.68824	-6.3833
6.10836	-6.86616		-5.8171	1.71392
-5.17147	-3.89983		-3.81819	1.63156
6.31059	-11.3473		8.72771	-13.7849
-7.67897	15.322		-3.07129	14.9063
-4.3897	-2.36512		-5.37629	1.43517
5.96551	-2.46259		-5.65248	4.30428
-5.52261	-5.3713		-3.4704	8.93044
4.80266	3.43155		6.13931	13.865
2.88544	16.1902		-4.91391	12.1081
6.74575	4.28869		-4.84521	14.8858
21.1315	-2.86456		-4.27714	14.2265
11.6176	7.05394		-2.95963	-10.1134
-8.01332	-7.45415		-4.97831	7.84055
11.854	2.10837		3.35707	14.1781
-3.28671	1.81659		-3.57984	11.9927
-5.70813	1.15571		4.78865	9.38744
4.38473	-4.77308		-3.48023	7.6103
-7.17837	3.16015		-3.79003	11.3443
-2.80697	2.16687		4.55314	3.80858
-5.91001	-5.27108		6.6196	-8.41222
5.01642	-4.94325		4.69669	8.04426
-3.41323	-3.86274		8.04714	-3.03035
16.2988	-2.72294		4.01167	-6.12202
6.31201	-6.72438		10.1736	-5.45198
-14.8201	-7.63586		-11.8083	-7.99849
3.08438	-19.2735		-8.47786	4.22616
-6.27497	-3.2148		-3.9898	-8.30803
9.06222	3.33939		-15.3878	-4.0178
7.64242	-0.980573		-2.80704	-10.5699
6.92561	1.05109		-17.3838	-7.91311
6.35593	-2.22377		-2.65434	-9.03699
-5.86931	-5.82897		8.20613	-12.3453
4.35296	-4.83775		-4.39469	-13.4063
-2.8524	-6.34349		4.73925	-1.24858
-6.52547	-6.85406		-5.20074	5.10801
7.01502	-10.6542		-8.34244	-4.47573
4.23465	-9.39418		6.89726	-2.05007
-19.0402	13.2429		-9.83777	5.44642
-27.7692	-7.42245		7.38729	-7.96439
-7.92311	3.82575		3.43311	-14.1601
-8.96583	8.82449		2.19277	1.20036
9.72509	-2.98544		-1.70659	2.51027
-1.62784	-3.21287		15.2902	-13.6641
-12.0462	-2.57028		-7.66352	-5.77527
-9.96614	-8.36493		-2.43632	16.6041
-5.24264	-4.4365		5.93276	8.05347
-3.35649	14.7901		-5.69063	0.876249
10.334	-9.3375		-2.12934	-16.7085
-4.9228	19.1175		6.11616	5.15956
-5.23097	-12.4919		-4.35698	-8.43512
-2.39879	-14.5966		5.44133	-8.92897
-10.1786	17.5515		0.975603	-7.48745
-3.15423	20.9516		4.35541	-10.4158
-6.1138	-14.6329		-5.61055	-6.80382
-4.5141	20.7452		-4.52738	-12.4346
-4.19824	-11.1201		-3.82569	-6.19355
2.3895	-8.08644		3.72456	2.19658
-0.615654	-2.70775		-3.30221	1.96953
-3.03196	-10.0318		-3.96863	9.43162
-4.7904	-6.29167		-2.30284	-10.6385
-8.62227	-7.33458		-2.8851	-7.92886
-3.59795	-17.201		4.07495	3.08769
14.7325	-4.84827		3.5714	3.84633
-4.06558	-4.08675		-2.72951	8.87392
16.0577	3.72698		2.27272	9.42033
8.10305	7.27439		-2.37872	-16.7224
5.4022	1.15812		-2.29539	-7.76321
-6.01208	-10.8742		3.12907	-14.9109
-6.15205	-4.523		3.12543	-5.45213
-5.86445	-1.92523		2.05421	-12.2777
-5.5785	-4.07104		-5.88878	-10.9315
-6.05137	-1.77468		3.813
-3.28525	-2.80494		-6.38054
6.96676	-1.78195		-4.87578
-2.21736	-1.83548		-11.386
-3.34146	5.6267		-4.08172
-14.0996	4.46369		-17.8161
-14.219	4.1569		-5.25609
-19.7551	4.94118		0.418764
12.185	14.0475		3.43432
-10.8872	-4.57057		-8.93216
7.29134	3.83525		-4.43373
-9.59944	6.9254		6.66819
1.63694	-2.77767		-2.79252
6.207	8.39297		-10.2491
-17.6812	5.03789		-6.2931
1.46007	7.04807		5.86527
-7.17127	-2.2246		3.66261
-5.79554	5.04716		-7.31024
-4.70799	-7.66714		-4.61716
-4.77528	-9.53084		3.87805
2.8969	-9.0433		7.02285
-4.11571	-4.25855		3.85982
-4.84832	-0.177071		2.70598
-6.94937	-0.873198		-4.6531
-5.09308	7.4294		-5.37555
-8.54639	6.28103		-4.79761
-20.1746	9.1959		-4.60668
21.058	4.76444		-6.8949
-23.0163	-19.5392		6.67024
-15.541	-0.594746		-5.29963
[truncated: 1,983 more rows]
