# Supplementary material for: 3D directional tuning in the orofacial sensorimotor cortex during natural feeding and drinking
Source: eLife. 2025 Oct 21;13:RP101325. doi: 10.7554/eLife.101325 (PMC12539803; doi:10.7554/eLife.101325)
Supplement: Figure 8—source data 2. [file elife-101325-fig8-data2.xlsx]

## Sheet: Sheet1
Figure 8 - Source Data 2
Figure 8B: Variance in 3D position of drinking trajectory endpoints
Summary Statistics
Control vs. Nerve Block
p-values
	Monkey R									Monkey Y
	Left			Middle			Right			Left			Middle			Right
	x	y	z	x	y	z	x	y	z	x	y	z	x	y	z	x	y	z
t-test	6.14323e-26	2.511e-13	1.70482e-238	7.64647e-08	1.63442e-41	0.0797835	2.4032e-42	4.12186e-33	2.07703e-42	0.00942757	2.29821e-99	2.02037e-118	8.5048e-86	2.65999e-268	1.56824e-291	3.33484e-56	1.23265e-43	4.92374e-32
f-test	0.982719	2.86724e-97	1.65512e-05	0.025771	0.00294469	0.0315837	0.53156	1.86356e-13	1.19166e-18	0.000293051	6.45993e-10	6.85081e-09	6.09935e-55	7.00203e-16	1.3049e-18	7.71273e-17	0.295832	0.000409029
Source Data
Monkey R																			Monkey Y
Control									Nerve Block										Control									Nerve Block
Left			Middle			Right			Left			Middle			Right				Left			Middle			Right			Left			Middle			Right
x	y	z	x	y	z	x	y	z	x	y	z	x	y	z	x	y	z		x	y	z	x	y	z	x	y	z	x	y	z	x	y	z	x	y	z
52.8265	-26.2504	-17.7119	54.8815	-27.9977	18.2368	54.2601	-28.2385	13.0683	55.4103	-22.6416	-0.13502	50.2961	-34.2091	-6.5175	46.2859	-34.756	13.7641		63.5677	-23.4617	-10.5916	65.9478	-26.0144	-4.59699	71.2964	-27.0673	2.8068	72.1637	-26.166	-6.13749	67.3757	-32.0223	2.89584	69.1239	-27.9933	6.56054
49.1974	-26.3705	-14.007	54.5616	-28.8155	3.01011	53.9897	-26.8556	15.8492	51.5882	-36.0272	-12.188	50.0273	-37.6656	-1.61247	51.7834	-35.8898	16.3794		69.5879	-21.4543	-15.7818	65.8072	-20.9597	-3.31022	74.4336	-22.7003	2.83153	66.4234	-31.1114	-13.4895	67.555	-29.9586	4.33668	68.1055	-28.9413	4.82291
51.7693	-28.4328	-15.005	52.0139	-30.3563	-0.0754014	59.6697	-26.2418	-1.02501	53.3236	-36.3178	-11.3944	49.5716	-33.621	-1.3884	47.6158	-40.6283	16.3704		68.2626	-22.073	-12.6748	72.8381	-20.9487	-2.20297	67.6538	-22.3815	5.77621	70.0953	-28.2087	-6.72334	68.2244	-32.0198	3.8856	68.7031	-27.0575	7.10412
51.3448	-27.3323	-18.0417	55.7266	-28.9314	-1.41405	52.7148	-31.2899	15.8599	53.377	-38.8791	-2.33002	52.1305	-36.1906	-3.88505	46.5687	-35.5355	17.915		69.6048	-21.0149	-14.3154	65.9478	-26.0144	-4.59699	71.2648	-27.5459	5.56341	65.2562	-27.0608	-8.16478	67.2586	-33.0315	2.80992	69.5334	-27.0798	4.59438
51.1097	-27.4188	-12.9625	57.9668	-27.3074	-2.07259	50.5101	-34.3981	16.3541	52.5686	-29.8182	-12.5044	54.4913	-29.3163	-2.22034	48.326	-34.2947	17.4685		68.826	-24.3884	-12.1499	65.8072	-20.9597	-3.31022	71.2964	-27.0673	2.8068	69.4526	-28.4038	-9.1376	67.1467	-31.9916	1.50851	69.3239	-28.2469	5.05131
52.9051	-23.4317	-14.9905	60.1719	-25.0527	0.861168	54.4584	-32.5063	11.7703	52.3674	-32.929	-13.7139	53.7101	-34.1438	-3.15202	51.5605	-36.7412	13.946		63.5677	-23.4617	-10.5916	72.8381	-20.9487	-2.20297	66.9126	-22.049	5.20501	64.3455	-26.1235	-11.084	64.6	-33.9825	4.89281	65.2914	-25.9065	12.0321
53.5117	-28.8302	-19.4396	54.7727	-27.41	-1.87569	49.4922	-23.9947	17.4536	52.1213	-37.0719	-10.9994	50.8329	-36.379	-1.40643	46.2859	-34.756	13.7641		67.5973	-23.5466	-6.85403	65.9478	-26.0144	-4.59699	74.4336	-22.7003	2.83153	67.2716	-25.4678	-7.7917	67.8031	-31.5221	2.31432	69.1239	-27.9933	6.56054
52.767	-26.5105	-17.0383	55.3419	-28.398	-0.225165	48.7491	-30.868	11.1405	51.506	-40.9222	-8.68871	47.0547	-31.8309	5.81374	50.3606	-32.2292	14.3226		69.5879	-21.4543	-15.7818	68.2188	-22.8477	-2.33083	67.6538	-22.3815	5.77621	72.1637	-26.166	-6.13749	66.6388	-33.0395	1.48123	69.7095	-26.069	7.20917
50.4766	-28.3019	-16.9049	61.7513	-24.8452	-1.57439	55.3373	-26.1133	16.2323	48.5472	-35.5585	-10.8901	55.759	-31.3193	-3.50672	51.7834	-35.8898	16.3794		67.0682	-21.8063	-12.6372	65.8072	-20.9597	-3.31022	71.2648	-27.5459	5.56341	68.4986	-25.8792	0.230943	68.9012	-31.4187	-3.51186	68.1055	-28.9413	4.82291
50.883	-29.4469	-18.1168	58.2496	-27.5282	-1.67172	51.4706	-32.37	19.2216	51.28	-30.8831	-13.3476	50.2961	-34.2091	-6.5175	47.8935	-40.0722	15.3162		68.2626	-22.073	-12.6748	71.1547	-20.5452	-4.95744	71.2964	-27.0673	2.8068	66.4234	-31.1114	-13.4895	66.7618	-30.7648	-1.4407	69.2964	-26.0999	6.99079
49.1383	-28.9006	-18.5149	54.8815	-27.9977	18.2368	52.808	-28.9311	17.0435	48.3863	-37.312	-15.3704	49.8479	-35.9103	1.05632	47.6158	-40.6283	16.3704		68.9895	-21.8998	-18.7748	72.8381	-20.9487	-2.20297	66.9126	-22.049	5.20501	63.7007	-24.6944	-6.56122	68.3637	-26.9633	10.1669	68.7031	-27.0575	7.10412
50.8171	-26.518	-17.6911	54.5616	-28.8155	3.01011	51.9347	-26.1983	16.4519	51.8642	-39.5145	-12.193	50.0273	-37.6656	-1.61247	49.3082	-39.0116	15.6117		69.6048	-21.0149	-14.3154	71.9385	-24.46	-3.06476	71.6353	-22.9697	8.37168	70.0953	-28.2087	-6.72334	67.3757	-32.0223	2.89584	68.4525	-27.9851	8.39253
51.3647	-26.677	-18.8459	52.0139	-30.3563	-0.0754014	54.2601	-28.2385	13.0683	55.4103	-22.6416	-0.13502	49.5716	-33.621	-1.3884	46.5687	-35.5355	17.915		68.8665	-22.2438	-15.5372	65.9478	-26.0144	-4.59699	74.4336	-22.7003	2.83153	65.2562	-27.0608	-8.16478	67.2785	-29.6412	7.17561	69.5334	-27.0798	4.59438
52.8265	-26.2504	-17.7119	55.7266	-28.9314	-1.41405	52.8268	-28.1655	16.6423	51.9078	-37.5211	-0.424701	52.1305	-36.1906	-3.88505	48.4997	-42.6009	13.1993		68.826	-24.3884	-12.1499	68.2188	-22.8477	-2.33083	74.7991	-22.97	1.44668	69.4526	-28.4038	-9.1376	67.555	-29.9586	4.33668	67.5227	-27.2501	7.41976
51.4189	-28.8224	-15.8776	57.9668	-27.3074	-2.07259	53.9897	-26.8556	15.8492	51.5882	-36.0272	-12.188	54.4913	-29.3163	-2.22034	48.326	-34.2947	17.4685		67.0819	-21.3883	-18.625	72.1218	-22.4634	-7.56071	67.6538	-22.3815	5.77621	64.3455	-26.1235	-11.084	65.8423	-30.4652	7.58733	70.5617	-25.7331	6.75226
49.1974	-26.3705	-14.007	60.1719	-25.0527	0.861168	51.0042	-30.4534	15.9522	52.2535	-31.614	-14.4991	53.7101	-34.1438	-3.15202	47.9701	-43.2921	13.1864		59.5698	-25.2147	-12.1326	65.8072	-20.9597	-3.31022	72.0217	-25.9125	2.47282	67.2716	-25.4678	-7.7917	68.2244	-32.0198	3.8856	62.5319	-29.6285	10.2337
48.3111	-27.7275	-11.0774	54.7727	-27.41	-1.87569	59.6697	-26.2418	-1.02501	53.3236	-36.3178	-11.3944	50.8329	-36.379	-1.40643	51.5605	-36.7412	13.946		62.3364	-21.4782	-9.08898	71.1547	-20.5452	-4.95744	71.2648	-27.5459	5.56341	72.1637	-26.166	-6.13749	67.1453	-32.6444	6.3566	69.7894	-27.2346	7.72178
51.7693	-28.4328	-15.005	55.3419	-28.398	-0.225165	53.1816	-26.1186	14.4684	52.708	-35.7481	-11.4145	47.0547	-31.8309	5.81374	47.3906	-25.4953	12.2		63.5677	-23.4617	-10.5916	68.1563	-23.9203	-6.57138	71.2964	-27.0673	2.8068	68.4986	-25.8792	0.230943	67.2586	-33.0315	2.80992	69.3239	-28.2469	5.05131
45.7401	-32.5155	-21.5186	61.7513	-24.8452	-1.57439	52.7148	-31.2899	15.8599	53.377	-38.8791	-2.33002	55.759	-31.3193	-3.50672	47.2685	-25.9884	11.9538		67.5973	-23.5466	-6.85403	72.8381	-20.9487	-2.20297	66.9126	-22.049	5.20501	68.8552	-28.3736	-10.4922	66.3392	-31.5328	6.15862	70.6189	-24.7739	4.79151
51.3448	-27.3323	-18.0417	58.2496	-27.5282	-1.67172	53.6732	-27.7238	17.1157	51.5542	-31.2617	-14.2408	50.2961	-34.2091	-6.5175	46.207	-26.9774	12.2976		64.2067	-22.2484	-10.4314	71.9385	-24.46	-3.06476	71.6353	-22.9697	8.37168	66.4234	-31.1114	-13.4895	67.1467	-31.9916	1.50851	65.2914	-25.9065	12.0321
51.6863	-27.6126	-18.8639	54.8815	-27.9977	18.2368	50.5101	-34.3981	16.3541	52.5686	-29.8182	-12.5044	49.8479	-35.9103	1.05632	49.0117	-37.564	12.9254		69.5879	-21.4543	-15.7818	69.9016	-27.6947	-5.1602	74.4336	-22.7003	2.83153	63.7007	-24.6944	-6.56122	64.4305	-32.9882	6.1609	64.4494	-31.3713	12.8062
51.1097	-27.4188	-12.9625	51.4793	-28.3629	-3.58529	52.1255	-29.9975	19.2558	53.4505	-28.7797	-13.3031	50.0273	-37.6656	-1.61247	50.2057	-33.7219	10.7028		67.0682	-21.8063	-12.6372	74.8928	-24.0639	-5.41345	74.7991	-22.97	1.44668	70.282	-23.7967	-9.40255	64.6	-33.9825	4.89281	67.7851	-28.2643	8.19473
49.2607	-29.0492	-10.4706	54.5616	-28.8155	3.01011	54.4584	-32.5063	11.7703	52.3674	-32.929	-13.7139	49.5716	-33.621	-1.3884	50.4597	-32.6904	10.5941		68.1505	-21.581	-16.9109	71.254	-25.7679	-4.59832	67.6538	-22.3815	5.77621	70.0953	-28.2087	-6.72334	68.7736	-29.2174	3.75242	67.0859	-30.4415	13.0193
52.9051	-23.4317	-14.9905	51.9881	-28.1219	-1.94729	54.584	-28.5175	16.6509	52.2562	-38.1276	-2.90411	52.1305	-36.1906	-3.88505	51.3715	-28.8458	11.4129		68.2626	-22.073	-12.6748	75.3686	-20.7465	0.114206	72.0217	-25.9125	2.47282	69.6241	-28.8762	-7.33836	67.8031	-31.5221	2.31432	69.1239	-27.9933	6.56054
48.5784	-28.9815	-18.6824	52.0139	-30.3563	-0.0754014	49.4922	-23.9947	17.4536	52.1213	-37.0719	-10.9994	54.4913	-29.3163	-2.22034	46.175	-28.2731	11.9325		68.9895	-21.8998	-18.7748	65.9478	-26.0144	-4.59699	71.2648	-27.5459	5.56341	65.2562	-27.0608	-8.16478	67.7307	-27.0839	6.27349	69.7095	-26.069	7.20917
53.5117	-28.8302	-19.4396	57.2076	-27.3841	-2.06381	54.635	-28.8768	17.8778	51.7244	-31.3623	-15.167	53.7101	-34.1438	-3.15202	44.8918	-30.3592	11.1711		59.5553	-22.5062	-13.0932	68.2188	-22.8477	-2.33083	71.2964	-27.0673	2.8068	70.9159	-26.0892	-7.91995	66.6388	-33.0395	1.48123	65.0407	-24.839	5.83616
49.2592	-32.4927	-20.3996	55.7266	-28.9314	-1.41405	48.7491	-30.868	11.1405	51.506	-40.9222	-8.68871	50.8329	-36.379	-1.40643	45.9159	-30.583	9.80834		69.6048	-21.0149	-14.3154	72.1218	-22.4634	-7.56071	66.9126	-22.049	5.20501	69.4526	-28.4038	-9.1376	65.6838	-32.9613	7.3676	68.1055	-28.9413	4.82291
52.767	-26.5105	-17.0383	51.615	-27.7947	1.00503	50.4142	-34.2646	19.0983	54.0195	-28.0953	-13.4907	47.0547	-31.8309	5.81374	45.3392	-31.4452	9.0288		68.8665	-22.2438	-15.5372	65.8072	-20.9597	-3.31022	71.6353	-22.9697	8.37168	64.9575	-27.0646	-9.5013	68.9012	-31.4187	-3.51186	69.2964	-26.0999	6.99079
49.6092	-28.9929	-12.7822	57.9668	-27.3074	-2.07259	55.3373	-26.1133	16.2323	48.5472	-35.5585	-10.8901	55.759	-31.3193	-3.50672	46.9001	-33.2861	10.1962		61.6707	-20.3137	-12.8771	71.1547	-20.5452	-4.95744	67.7226	-25.8344	7.68999	64.3455	-26.1235	-11.084	65.9105	-32.2998	3.75011	69.9596	-24.1749	5.66947
50.4766	-28.3019	-16.9049	57.5807	-25.6819	-3.19091	47.1724	-33.1254	12.3425	55.6869	-32.0666	-8.90852				46.4111	-40.7489	14.0506		68.826	-24.3884	-12.1499	68.1563	-23.9203	-6.57138	74.4336	-22.7003	2.83153	69.9913	-28.1293	-8.61734	66.7618	-30.7648	-1.4407	68.7031	-27.0575	7.10412
55.2976	-25.7926	-16.0568	60.1719	-25.0527	0.861168	51.4706	-32.37	19.2216	51.28	-30.8831	-13.3476				46.2859	-34.756	13.7641		67.0819	-21.3883	-18.625	72.8381	-20.9487	-2.20297	74.7991	-22.97	1.44668	67.2716	-25.4678	-7.7917	64.7859	-31.8564	5.41891	68.4525	-27.9851	8.39253
50.883	-29.4469	-18.1168	51.3676	-27.5352	0.409301	47.6717	-37.3121	16.6337	49.9187	-40.5176	-1.46125				50.3606	-32.2292	14.3226		68.9247	-24.9875	-14.3212	71.9385	-24.46	-3.06476	72.572	-22.0352	3.62951	68.3143	-23.6375	-13.2484	66.0621	-32.6436	2.76266	68.1926	-24.534	6.57044
48.711	-30.876	-21.6536	54.7727	-27.41	-1.87569	52.808	-28.9311	17.0435	48.3863	-37.312	-15.3704				44.9677	-31.8136	3.87435		59.5698	-25.2147	-12.1326	69.9016	-27.6947	-5.1602	67.6538	-22.3815	5.77621	72.1637	-26.166	-6.13749	67.4378	-23.3237	6.58872	69.5334	-27.0798	4.59438
49.1383	-28.9006	-18.5149	55.3419	-28.398	-0.225165	52.4268	-28.7239	18.1982	48.2118	-32.7466	-9.79712				51.7834	-35.8898	16.3794		62.3364	-21.4782	-9.08898	74.8928	-24.0639	-5.41345	72.0217	-25.9125	2.47282	68.4986	-25.8792	0.230943	65.1595	-31.92	4.77655	67.5227	-27.2501	7.41976
51.1393	-27.5282	-17.4809	61.7513	-24.8452	-1.57439	51.9347	-26.1983	16.4519	51.8642	-39.5145	-12.193				47.8935	-40.0722	15.3162		63.5677	-23.4617	-10.5916	71.254	-25.7679	-4.59832	71.6866	-25.5821	2.39628	68.8552	-28.3736	-10.4922	68.3637	-26.9633	10.1669	69.1215	-24.6582	6.2562
50.8171	-26.518	-17.6911	58.2496	-27.5282	-1.67172	54.97	-28.0561	14.3375	53.5777	-29.5373	-12.9329				44.0352	-31.3818	5.68914		67.5973	-23.5466	-6.85403	75.3686	-20.7465	0.114206	71.2648	-27.5459	5.56341	64.1396	-25.34	-2.93303	66.7081	-28.9466	5.40735	70.5617	-25.7331	6.75226
52.0679	-27.4518	-18.0964	54.8815	-27.9977	18.2368	54.2601	-28.2385	13.0683	55.4103	-22.6416	-0.13502				47.6158	-40.6283	16.3704		64.2067	-22.2484	-10.4314	65.9478	-26.0144	-4.59699	69.6828	-24.953	4.74139	66.4234	-31.1114	-13.4895	67.3757	-32.0223	2.89584	70.2247	-25.3995	13.2731
51.3647	-26.677	-18.8459	51.4793	-28.3629	-3.58529	52.8268	-28.1655	16.6423	51.9078	-37.5211	-0.424701				49.3082	-39.0116	15.6117		66.0953	-28.683	-11.9162	68.2188	-22.8477	-2.33083	72.3032	-23.4801	5.52393	63.7007	-24.6944	-6.56122	67.2785	-29.6412	7.17561	62.5319	-29.6285	10.2337
48.0247	-31.9469	-11.1319	60.185	-27.9994	-0.873539	51.8803	-27.4861	15.8694	51.9629	-29.8555	-12.6317				46.5687	-35.5355	17.915		69.5879	-21.4543	-15.7818	72.1218	-22.4634	-7.56071	71.2964	-27.0673	2.8068	70.282	-23.7967	-9.40255	68.5658	-26.3729	5.22837	68.5888	-29.3551	7.48823
49.5458	-27.2748	-18.4357	54.5616	-28.8155	3.01011	53.9897	-26.8556	15.8492	51.5882	-36.0272	-12.188				48.4997	-42.6009	13.1993		67.0682	-21.8063	-12.6372	71.0533	-22.6856	-3.07014	66.9126	-22.049	5.20501	70.0953	-28.2087	-6.72334	67.555	-29.9586	4.33668	69.7894	-27.2346	7.72178
48.5607	-29.2289	-15.2738	51.9881	-28.1219	-1.94729	51.0042	-30.4534	15.9522	52.2535	-31.614	-14.4991				48.326	-34.2947	17.4685		68.1505	-21.581	-16.9109	65.8072	-20.9597	-3.31022	71.6353	-22.9697	8.37168	69.6241	-28.8762	-7.33836	65.8423	-30.4652	7.58733	69.1535	-26.8446	-3.77629
52.8265	-26.2504	-17.7119	51.159	-28.1662	0.35541	50.7078	-30.5301	10.9071	49.3686	-29.5222	-9.48178				47.9701	-43.2921	13.1864		69.1311	-22.1498	-12.4543	71.1547	-20.5452	-4.95744	67.7226	-25.8344	7.68999	65.2562	-27.0608	-8.16478	66.7145	-28.5103	5.46719	69.3239	-28.2469	5.05131
51.4189	-28.8224	-15.8776	52.0139	-30.3563	-0.0754014	59.6697	-26.2418	-1.02501	53.3236	-36.3178	-11.3944				51.5605	-36.7412	13.946		68.2626	-22.073	-12.6748	68.1563	-23.9203	-6.57138	63.877	-22.1651	6.27955	70.9159	-26.0892	-7.91995	68.2244	-32.0198	3.8856	70.6189	-24.7739	4.79151
49.1974	-26.3705	-14.007	57.2076	-27.3841	-2.06381	53.1816	-26.1186	14.4684	52.708	-35.7481	-11.4145				47.3906	-25.4953	12.2		68.9895	-21.8998	-18.7748	67.9969	-20.3815	-2.89307	74.4336	-22.7003	2.83153	62.9475	-24.9356	-3.08922	67.1453	-32.6444	6.3566	69.0325	-23.4313	4.91307
48.3111	-27.7275	-11.0774	52.0057	-26.5542	1.14986	52.9969	-29.942	16.8061	50.2466	-35.3521	-8.84033				47.2685	-25.9884	11.9538		59.5553	-22.5062	-13.0932	72.8381	-20.9487	-2.20297	74.7991	-22.97	1.44668	69.4526	-28.4038	-9.1376	67.9411	-23.0068	2.43076	65.2914	-25.9065	12.0321
51.7693	-28.4328	-15.005	55.7266	-28.9314	-1.41405	52.7148	-31.2899	15.8599	53.377	-38.8791	-2.33002				46.207	-26.9774	12.2976		68.8403	-22.0958	-11.3553	71.9385	-24.46	-3.06476	72.572	-22.0352	3.62951	64.9575	-27.0646	-9.5013	67.2586	-33.0315	2.80992	64.4494	-31.3713	12.8062
45.7401	-32.5155	-21.5186	51.615	-27.7947	1.00503	53.6732	-27.7238	17.1157	51.5542	-31.2617	-14.2408				49.0117	-37.564	12.9254		69.6048	-21.0149	-14.3154	69.9016	-27.6947	-5.1602	72.7708	-21.2495	3.83955	67.5623	-30.7543	-5.58782	66.3392	-31.5328	6.15862	69.6911	-27.4359	7.67008
51.3448	-27.3323	-18.0417	57.9668	-27.3074	-2.07259	52.7629	-31.5466	17.3603	49.179	-29.5614	-8.05179				50.2057	-33.7219	10.7028		68.8665	-22.2438	-15.5372	65.9057	-21.8814	-5.65439	67.6538	-22.3815	5.77621	64.3455	-26.1235	-11.084	72.3242	-25.2917	0.918017	67.7851	-28.2643	8.19473
51.6863	-27.6126	-18.8639	57.5807	-25.6819	-3.19091	50.5101	-34.3981	16.3541	52.5686	-29.8182	-12.5044				50.4597	-32.6904	10.5941		61.6707	-20.3137	-12.8771	74.8928	-24.0639	-5.41345	72.0217	-25.9125	2.47282	69.9913	-28.1293	-8.61734	67.1467	-31.9916	1.50851	67.0859	-30.4415	13.0193
51.1097	-27.4188	-12.9625	60.1719	-25.0527	0.861168	52.1255	-29.9975	19.2558	53.4505	-28.7797	-13.3031				51.3715	-28.8458	11.4129		68.826	-24.3884	-12.1499	61.9953	-22.5033	4.50504	71.6866	-25.5821	2.39628	65.6474	-25.0503	-7.5496	64.4305	-32.9882	6.1609	69.1239	-27.9933	6.56054
49.2607	-29.0492	-10.4706	51.3676	-27.5352	0.409301	54.431	-30.0784	16.2283	51.5203	-36.5093	-11.0485				46.175	-28.2731	11.9325		67.0819	-21.3883	-18.625	71.254	-25.7679	-4.59832	71.1792	-22.2448	1.06801	67.2716	-25.4678	-7.7917	66.4777	-31.4165	3.68138	69.7095	-26.069	7.20917
52.9051	-23.4317	-14.9905	54.7727	-27.41	-1.87569	54.4584	-32.5063	11.7703	52.3674	-32.929	-13.7139				44.8918	-30.3592	11.1711		68.9247	-24.9875	-14.3212	71.7878	-24.3325	-5.14977	71.2648	-27.5459	5.56341	68.3143	-23.6375	-13.2484	64.6	-33.9825	4.89281	65.0407	-24.839	5.83616
48.5784	-28.9815	-18.6824	55.3419	-28.398	-0.225165	54.584	-28.5175	16.6509	52.2562	-38.1276	-2.90411				45.9159	-30.583	9.80834		63.8729	-27.1048	-11.9537	75.3686	-20.7465	0.114206	69.6828	-24.953	4.74139	68.2227	-22.0441	-1.04277	68.7736	-29.2174	3.75242	69.976	-23.8529	2.86188
53.5117	-28.8302	-19.4396	61.7513	-24.8452	-1.57439	50.949	-32.4254	17.2734	51.704	-37.3433	-11.3366				45.3392	-31.4452	9.0288		59.5698	-25.2147	-12.1326	65.9478	-26.0144	-4.59699	66.5541	-24.7706	8.55521	72.1637	-26.166	-6.13749	64.1419	-31.6902	4.72166	68.1055	-28.9413	4.82291
49.2592	-32.4927	-20.3996	58.2496	-27.5282	-1.67172	49.4922	-23.9947	17.4536	52.1213	-37.0719	-10.9994				46.9001	-33.2861	10.1962		68.5118	-24.5582	-11.3281	68.2188	-22.8477	-2.33083	72.3032	-23.4801	5.52393	68.4986	-25.8792	0.230943	67.8031	-31.5221	2.31432	69.2964	-26.0999	6.99079
52.767	-26.5105	-17.0383	54.8815	-27.9977	18.2368	54.635	-28.8768	17.8778	51.7244	-31.3623	-15.167				46.4111	-40.7489	14.0506		62.3364	-21.4782	-9.08898	72.1218	-22.4634	-7.56071	72.5417	-22.8625	1.97963	68.8552	-28.3736	-10.4922	67.7307	-27.0839	6.27349	69.9596	-24.1749	5.66947
49.6092	-28.9929	-12.7822	51.4793	-28.3629	-3.58529	60.7355	-26.0869	-2.1608	49.9034	-27.662	-12.933				46.2859	-34.756	13.7641		63.5677	-23.4617	-10.5916	71.0533	-22.6856	-3.07014	71.2964	-27.0673	2.8068	64.1396	-25.34	-2.93303	67.4137	-29.4197	5.94469	70.2474	-24.8325	7.00571
50.4766	-28.3019	-16.9049	60.185	-27.9994	-0.873539	48.7491	-30.868	11.1405	51.506	-40.9222	-8.68871				50.3606	-32.2292	14.3226		67.5973	-23.5466	-6.85403	65.0424	-24.6069	-4.86522	66.9126	-22.049	5.20501	66.4234	-31.1114	-13.4895	66.6388	-33.0395	1.48123	68.7031	-27.0575	7.10412
55.2976	-25.7926	-16.0568	52.5036	-28.8943	-0.222244	50.4142	-34.2646	19.0983	54.0195	-28.0953	-13.4907				44.9677	-31.8136	3.87435		64.2067	-22.2484	-10.4314	65.8072	-20.9597	-3.31022	71.6353	-22.9697	8.37168	63.7007	-24.6944	-6.56122	65.6838	-32.9613	7.3676	68.4525	-27.9851	8.39253
50.883	-29.4469	-18.1168	54.5616	-28.8155	3.01011	52.8603	-29.3171	18.3744	49.8383	-37.8024	-13.6795				51.4302	-28.0451	12.426		66.0953	-28.683	-11.9162	71.1547	-20.5452	-4.95744	67.7226	-25.8344	7.68999	70.282	-23.7967	-9.40255	67.5437	-29.3438	2.2412	68.1926	-24.534	6.57044
48.711	-30.876	-21.6536	51.9881	-28.1219	-1.94729	55.3373	-26.1133	16.2323	48.5472	-35.5585	-10.8901				51.7834	-35.8898	16.3794		64.9411	-24.9367	-13.0462	68.1563	-23.9203	-6.57138	63.877	-22.1651	6.27955	70.0953	-28.2087	-6.72334	68.9012	-31.4187	-3.51186	69.5991	-24.9365	7.01411
49.1383	-28.9006	-18.5149	51.159	-28.1662	0.35541	47.1724	-33.1254	12.3425	55.6869	-32.0666	-8.90852				47.8935	-40.0722	15.3162		69.5879	-21.4543	-15.7818	67.9969	-20.3815	-2.89307	69.6628	-25.1359	1.07142	69.6241	-28.8762	-7.33836	65.9105	-32.2998	3.75011	69.5334	-27.0798	4.59438
51.1393	-27.5282	-17.4809	59.8009	-24.98	-3.739	52.7863	-30.0979	17.5186	47.6307	-33.3234	-9.50524				44.0352	-31.3818	5.68914		67.0682	-21.8063	-12.6372	69.7819	-24.4177	-5.15893	74.4336	-22.7003	2.83153	65.2562	-27.0608	-8.16478	68.4112	-32.0479	0.708007	67.5227	-27.2501	7.41976
50.8171	-26.518	-17.6911	52.0139	-30.3563	-0.0754014	51.4706	-32.37	19.2216	51.28	-30.8831	-13.3476				53.8082	-31.3017	12.6609		68.1505	-21.581	-16.9109	72.8381	-20.9487	-2.20297	74.7991	-22.97	1.44668	70.9159	-26.0892	-7.91995	66.7618	-30.7648	-1.4407	69.1215	-24.6582	6.2562
52.0679	-27.4518	-18.0964	57.2076	-27.3841	-2.06381	47.6717	-37.3121	16.6337	49.9187	-40.5176	-1.46125				47.6158	-40.6283	16.3704		69.1311	-22.1498	-12.4543	71.9385	-24.46	-3.06476	72.572	-22.0352	3.62951	62.9475	-24.9356	-3.08922	64.7859	-31.8564	5.41891	66.2234	-25.2104	7.9493
51.3647	-26.677	-18.8459	52.0057	-26.5542	1.14986	49.6055	-30.6428	19.408	48.3863	-37.312	-15.3704				49.3082	-39.0116	15.6117		64.8081	-25.5602	-14.9689	69.9016	-27.6947	-5.1602	72.7708	-21.2495	3.83955	69.4526	-28.4038	-9.1376	66.0527	-29.585	3.39705	70.5617	-25.7331	6.75226
48.0247	-31.9469	-11.1319	51.3109	-28.2254	0.802119	52.808	-28.9311	17.0435	48.2118	-32.7466	-9.79712				53.2672	-32.0599	12.7647		68.2626	-22.073	-12.6748	65.9057	-21.8814	-5.65439	70.5162	-21.7087	5.02444	64.9575	-27.0646	-9.5013	66.0621	-32.6436	2.76266	70.2247	-25.3995	13.2731
49.5458	-27.2748	-18.4357	55.7266	-28.9314	-1.41405	52.4268	-28.7239	18.1982	51.8642	-39.5145	-12.193				46.5687	-35.5355	17.915		68.9895	-21.8998	-18.7748	70.6566	-24.6865	-5.38424	67.6538	-22.3815	5.77621	67.5623	-30.7543	-5.58782	66.8319	-26.8995	7.48495	62.5319	-29.6285	10.2337
48.5607	-29.2289	-15.2738	51.615	-27.7947	1.00503	52.2717	-31.6391	21.0415	53.5777	-29.5373	-12.9329				48.4997	-42.6009	13.1993		59.5553	-22.5062	-13.0932	74.8928	-24.0639	-5.41345	72.0217	-25.9125	2.47282	64.3455	-26.1235	-11.084	67.4378	-23.3237	6.58872	68.5888	-29.3551	7.48823
52.8265	-26.2504	-17.7119	52.1913	-26.4862	0.249105	51.9347	-26.1983	16.4519	55.4103	-22.6416	-0.13502				49.6577	-39.1072	13.6769		68.8403	-22.0958	-11.3553	61.9953	-22.5033	4.50504	71.6866	-25.5821	2.39628	69.9913	-28.1293	-8.61734	64.784	-31.7767	5.25487	69.7894	-27.2346	7.72178
51.4189	-28.8224	-15.8776	57.9668	-27.3074	-2.07259	54.97	-28.0561	14.3375	51.9078	-37.5211	-0.424701				48.326	-34.2947	17.4685		63.2248	-22.9024	-9.57957	70.5963	-21.8514	-2.59445	71.1792	-22.2448	1.06801	65.6474	-25.0503	-7.5496	65.1595	-31.92	4.77655	69.1535	-26.8446	-3.77629
52.1714	-28.1744	-16.5122	57.5807	-25.6819	-3.19091	46.7137	-34.4927	16.1804	51.9629	-29.8555	-12.6317				47.9701	-43.2921	13.1864		69.6048	-21.0149	-14.3154	71.254	-25.7679	-4.59832	71.2648	-27.5459	5.56341	67.2716	-25.4678	-7.7917	69.178	-25.4821	4.80892	69.3239	-28.2469	5.05131
49.1974	-26.3705	-14.007	51.3161	-27.8503	0.0471307	53.3635	-34.6901	16.4226	51.5882	-36.0272	-12.188				51.5605	-36.7412	13.946		68.8665	-22.2438	-15.5372	71.7878	-24.3325	-5.14977	69.6828	-24.953	4.74139	68.3143	-23.6375	-13.2484	67.1271	-31.0242	5.44644	70.6189	-24.7739	4.79151
48.3111	-27.7275	-11.0774	60.1719	-25.0527	0.861168	54.2601	-28.2385	13.0683	52.2535	-31.614	-14.4991				47.3906	-25.4953	12.2		61.6707	-20.3137	-12.8771	69.3547	-27.6187	-4.93402	66.5541	-24.7706	8.55521	68.2227	-22.0441	-1.04277	66.0469	-28.4949	-1.41555	69.0325	-23.4313	4.91307
47.2141	-27.6128	-23.4197	51.3676	-27.5352	0.409301	52.8268	-28.1655	16.6423	49.3686	-29.5222	-9.48178				47.2685	-25.9884	11.9538		66.6505	-23.2874	-16.7568	75.3686	-20.7465	0.114206	72.3032	-23.4801	5.52393	72.1637	-26.166	-6.13749	68.3637	-26.9633	10.1669	65.2914	-25.9065	12.0321
51.7693	-28.4328	-15.005	53.1996	-26.2891	-4.03733	51.8803	-27.4861	15.8694	53.3236	-36.3178	-11.3944				46.207	-26.9774	12.2976		68.826	-24.3884	-12.1499	72.0155	-26.2105	-4.9099	72.5417	-22.8625	1.97963	68.4986	-25.8792	0.230943	66.7081	-28.9466	5.40735	64.4494	-31.3713	12.8062
45.7401	-32.5155	-21.5186	54.7727	-27.41	-1.87569	53.9897	-26.8556	15.8492	52.708	-35.7481	-11.4145				49.0117	-37.564	12.9254		67.0819	-21.3883	-18.625	65.9478	-26.0144	-4.59699	71.2964	-27.0673	2.8068	68.8552	-28.3736	-10.4922	66.4452	-32.0677	4.27287	69.6911	-27.4359	7.67008
55.1252	-25.3237	-3.07171	53.8557	-26.4468	-1.49706	51.0042	-30.4534	15.9522	50.2466	-35.3521	-8.84033				50.2057	-33.7219	10.7028		68.9247	-24.9875	-14.3212	68.2188	-22.8477	-2.33083	66.9126	-22.049	5.20501	64.1396	-25.34	-2.93303	67.3757	-32.0223	2.89584	67.7851	-28.2643	8.19473
51.3448	-27.3323	-18.0417	55.3419	-28.398	-0.225165	50.7078	-30.5301	10.9071	53.377	-38.8791	-2.33002				50.4597	-32.6904	10.5941		63.8729	-27.1048	-11.9537	72.1218	-22.4634	-7.56071	71.6353	-22.9697	8.37168	66.4234	-31.1114	-13.4895	67.2785	-29.6412	7.17561	67.0859	-30.4415	13.0193
51.6863	-27.6126	-18.8639	52.5454	-28.4506	0.31103	59.6697	-26.2418	-1.02501	51.5542	-31.2617	-14.2408				51.3715	-28.8458	11.4129		65.7945	-25.5966	-12.123	71.0533	-22.6856	-3.07014	67.7226	-25.8344	7.68999	63.7007	-24.6944	-6.56122	68.5658	-26.3729	5.22837	69.1239	-27.9933	6.56054
48.374	-31.7961	-13.1345	61.7513	-24.8452	-1.57439	53.1816	-26.1186	14.4684	49.179	-29.5614	-8.05179				46.175	-28.2731	11.9325		59.5698	-25.2147	-12.1326	65.0424	-24.6069	-4.86522	63.877	-22.1651	6.27955	70.282	-23.7967	-9.40255	71.1039	-25.3408	-0.16935	69.7095	-26.069	7.20917
51.1097	-27.4188	-12.9625	58.2496	-27.5282	-1.67172	52.9969	-29.942	16.8061	52.5686	-29.8182	-12.5044				44.8918	-30.3592	11.1711		68.5118	-24.5582	-11.3281	65.8072	-20.9597	-3.31022	69.6628	-25.1359	1.07142	63.51	-30.9728	-15.4124	67.555	-29.9586	4.33668	65.0407	-24.839	5.83616
49.2607	-29.0492	-10.4706	54.8815	-27.9977	18.2368	52.7148	-31.2899	15.8599	53.4505	-28.7797	-13.3031				45.9159	-30.583	9.80834		69.0623	-23.6715	-14.8324	71.1547	-20.5452	-4.95744	74.4336	-22.7003	2.83153	70.0953	-28.2087	-6.72334	65.8423	-30.4652	7.58733	69.976	-23.8529	2.86188
48.5023	-36.2512	-19.8601	51.4793	-28.3629	-3.58529	53.6732	-27.7238	17.1157	51.5203	-36.5093	-11.0485				45.3392	-31.4452	9.0288		62.3364	-21.4782	-9.08898	68.1563	-23.9203	-6.57138	74.7991	-22.97	1.44668	69.6241	-28.8762	-7.33836	66.7145	-28.5103	5.46719	68.9208	-27.3854	3.16608
52.9051	-23.4317	-14.9905	60.185	-27.9994	-0.873539	52.7629	-31.5466	17.3603	52.3674	-32.929	-13.7139				46.9001	-33.2861	10.1962		63.5677	-23.4617	-10.5916	67.9969	-20.3815	-2.89307	72.572	-22.0352	3.62951	68.3256	-21.7572	-6.29029	68.2244	-32.0198	3.8856	68.1055	-28.9413	4.82291
48.5784	-28.9815	-18.6824	52.5036	-28.8943	-0.222244	50.5101	-34.3981	16.3541	52.2562	-38.1276	-2.90411				46.4111	-40.7489	14.0506		67.5973	-23.5466	-6.85403	69.7819	-24.4177	-5.15893	72.7708	-21.2495	3.83955	65.2562	-27.0608	-8.16478	67.1453	-32.6444	6.3566	69.2964	-26.0999	6.99079
49.9346	-32.1379	-20.8076	62.3002	-29.3161	-3.00594	52.1255	-29.9975	19.2558	51.704	-37.3433	-11.3366				46.2859	-34.756	13.7641		64.2067	-22.2484	-10.4314	72.8381	-20.9487	-2.20297	70.5162	-21.7087	5.02444	70.9159	-26.0892	-7.91995	67.9411	-23.0068	2.43076	69.9596	-24.1749	5.66947
53.5117	-28.8302	-19.4396	54.5616	-28.8155	3.01011	54.431	-30.0784	16.2283	52.1213	-37.0719	-10.9994				50.3606	-32.2292	14.3226		66.0953	-28.683	-11.9162	71.9385	-24.46	-3.06476	67.6538	-22.3815	5.77621	62.9475	-24.9356	-3.08922	67.2586	-33.0315	2.80992	70.2474	-24.8325	7.00571
49.2592	-32.4927	-20.3996	51.9881	-28.1219	-1.94729	54.4584	-32.5063	11.7703	51.7244	-31.3623	-15.167				44.9677	-31.8136	3.87435		64.9411	-24.9367	-13.0462	69.9016	-27.6947	-5.1602	72.0217	-25.9125	2.47282	69.6959	-22.6466	-0.186804	66.3392	-31.5328	6.15862	67.205	-27.4102	-2.04705
49.8836	-35.0473	-15.1304	51.159	-28.1662	0.35541	54.584	-28.5175	16.6509	49.9034	-27.662	-12.933				51.4302	-28.0451	12.426		69.5879	-21.4543	-15.7818	65.9057	-21.8814	-5.65439	71.6866	-25.5821	2.39628	69.4526	-28.4038	-9.1376	72.3242	-25.2917	0.918017	68.7031	-27.0575	7.10412
52.767	-26.5105	-17.0383	59.8009	-24.98	-3.739	50.949	-32.4254	17.2734	51.506	-40.9222	-8.68871				54.0908	-31.0263	11.9797		67.0682	-21.8063	-12.6372	70.6566	-24.6865	-5.38424	71.1792	-22.2448	1.06801	64.9575	-27.0646	-9.5013	67.1467	-31.9916	1.50851	68.4525	-27.9851	8.39253
49.6092	-28.9929	-12.7822	51.1572	-29.9118	0.790743	49.4922	-23.9947	17.4536	54.0195	-28.0953	-13.4907				51.7834	-35.8898	16.3794		68.1505	-21.581	-16.9109	74.8928	-24.0639	-5.41345	71.2648	-27.5459	5.56341	67.5623	-30.7543	-5.58782	64.4305	-32.9882	6.1609	68.1926	-24.534	6.57044
50.22	-27.9252	-17.2788	52.0139	-30.3563	-0.0754014	54.635	-28.8768	17.8778	49.8383	-37.8024	-13.6795				47.8935	-40.0722	15.3162		69.1311	-22.1498	-12.4543	61.9953	-22.5033	4.50504	69.6828	-24.953	4.74139	69.0481	-27.6223	-6.52258	66.4777	-31.4165	3.68138	69.5991	-24.9365	7.01411
50.4766	-28.3019	-16.9049	57.2076	-27.3841	-2.06381	60.7355	-26.0869	-2.1608	48.5472	-35.5585	-10.8901				44.0352	-31.3818	5.68914		64.8081	-25.5602	-14.9689	70.5963	-21.8514	-2.59445	66.5541	-24.7706	8.55521	64.3455	-26.1235	-11.084	64.6	-33.9825	4.89281	69.5334	-27.0798	4.59438
55.2976	-25.7926	-16.0568	52.0057	-26.5542	1.14986	48.7491	-30.868	11.1405	55.6869	-32.0666	-8.90852				53.8082	-31.3017	12.6609		68.2626	-22.073	-12.6748	71.254	-25.7679	-4.59832	72.3032	-23.4801	5.52393	69.9913	-28.1293	-8.61734	68.7736	-29.2174	3.75242	67.5227	-27.2501	7.41976
48.0916	-34.2644	-13.8372	51.3109	-28.2254	0.802119	50.4142	-34.2646	19.0983	47.6307	-33.3234	-9.50524				53.9701	-32.183	10.8494		68.9895	-21.8998	-18.7748	71.7878	-24.3325	-5.14977	72.5417	-22.8625	1.97963	65.6474	-25.0503	-7.5496	64.1419	-31.6902	4.72166	69.1215	-24.6582	6.2562
50.883	-29.4469	-18.1168	63.6226	-21.4546	-4.01529	52.8603	-29.3171	18.3744	51.28	-30.8831	-13.3476				47.6158	-40.6283	16.3704		59.5553	-22.5062	-13.0932	69.3547	-27.6187	-4.93402	71.2964	-27.0673	2.8068	69.3842	-28.4513	-7.03929	66.0211	-29.8104	3.47874	66.2234	-25.2104	7.9493
48.711	-30.876	-21.6536	55.7266	-28.9314	-1.41405	55.3373	-26.1133	16.2323	49.9187	-40.5176	-1.46125				49.3082	-39.0116	15.6117		68.8403	-22.0958	-11.3553	75.3686	-20.7465	0.114206	66.9126	-22.049	5.20501	67.2716	-25.4678	-7.7917	67.8031	-31.5221	2.31432	70.5617	-25.7331	6.75226
50.5949	-26.2853	-17.2699	51.615	-27.7947	1.00503	47.1724	-33.1254	12.3425	48.3863	-37.312	-15.3704				53.2672	-32.0599	12.7647		63.2248	-22.9024	-9.57957	72.0155	-26.2105	-4.9099	71.6353	-22.9697	8.37168	68.3143	-23.6375	-13.2484	67.7307	-27.0839	6.27349	70.2247	-25.3995	13.2731
49.1383	-28.9006	-18.5149	52.1913	-26.4862	0.249105	52.7863	-30.0979	17.5186	48.2118	-32.7466	-9.79712				50.5608	-29.7939	8.02067		69.6048	-21.0149	-14.3154	65.9478	-26.0144	-4.59699	67.7226	-25.8344	7.68999	68.2227	-22.0441	-1.04277	67.4137	-29.4197	5.94469	62.5319	-29.6285	10.2337
51.1393	-27.5282	-17.4809	57.2852	-28.5145	-2.15797	51.4706	-32.37	19.2216	51.8642	-39.5145	-12.193				46.5687	-35.5355	17.915		68.8665	-22.2438	-15.5372	68.2188	-22.8477	-2.33083	63.877	-22.1651	6.27955	67.7491	-30.7931	2.52621	70.4635	-29.2647	4.12427	68.5888	-29.3551	7.48823
48.3121	-33.0036	-10.7396	57.9668	-27.3074	-2.07259	47.6717	-37.3121	16.6337	53.5777	-29.5373	-12.9329				48.4997	-42.6009	13.1993		61.6707	-20.3137	-12.8771	72.1218	-22.4634	-7.56071	69.6628	-25.1359	1.07142	69.2036	-27.4237	-1.06762	66.6388	-33.0395	1.48123	69.7894	-27.2346	7.72178
50.8171	-26.518	-17.6911	57.5807	-25.6819	-3.19091	49.6055	-30.6428	19.408	55.4103	-22.6416	-0.13502				49.6577	-39.1072	13.6769		66.6505	-23.2874	-16.7568	71.0533	-22.6856	-3.07014	74.4336	-22.7003	2.83153	59.3136	-26.2926	1.43875	65.6838	-32.9613	7.3676	69.1535	-26.8446	-3.77629
52.0679	-27.4518	-18.0964	51.3161	-27.8503	0.0471307	52.808	-28.9311	17.0435	51.9078	-37.5211	-0.424701				48.9272	-33.1954	8.75726		68.826	-24.3884	-12.1499	65.0424	-24.6069	-4.86522	74.7991	-22.97	1.44668	68.6141	-28.5428	-7.64584	67.5437	-29.3438	2.2412	69.3239	-28.2469	5.05131
50.9745	-28.6456	-18.6928	50.1542	-30.0051	3.48878	52.4268	-28.7239	18.1982	51.9629	-29.8555	-12.6317				48.326	-34.2947	17.4685		67.0819	-21.3883	-18.625	65.8072	-20.9597	-3.31022	72.572	-22.0352	3.62951	68.7306	-30.4027	-2.31397	67.2939	-31.8285	4.73826	70.6189	-24.7739	4.79151
51.3647	-26.677	-18.8459	60.1719	-25.0527	0.861168	52.2717	-31.6391	21.0415	51.5882	-36.0272	-12.188				47.9701	-43.2921	13.1864		68.9247	-24.9875	-14.3212	71.1547	-20.5452	-4.95744	72.7708	-21.2495	3.83955	72.1637	-26.166	-6.13749	68.9012	-31.4187	-3.51186	69.0325	-23.4313	4.91307
48.0247	-31.9469	-11.1319	51.3676	-27.5352	0.409301	51.9347	-26.1983	16.4519	52.2535	-31.614	-14.4991				52.2991	-34.3862	11.2366		63.8729	-27.1048	-11.9537	68.1563	-23.9203	-6.57138	70.5162	-21.7087	5.02444	68.4986	-25.8792	0.230943	65.9105	-32.2998	3.75011	65.2914	-25.9065	12.0321
49.5324	-29.1618	-18.8372	53.1996	-26.2891	-4.03733	54.97	-28.0561	14.3375	49.3686	-29.5222	-9.48178				51.5605	-36.7412	13.946		65.7945	-25.5966	-12.123	67.9969	-20.3815	-2.89307	67.6538	-22.3815	5.77621	68.8552	-28.3736	-10.4922	68.4112	-32.0479	0.708007	64.4494	-31.3713	12.8062
49.5458	-27.2748	-18.4357	62.1392	-25.5486	-3.33048	46.7137	-34.4927	16.1804	53.3236	-36.3178	-11.3944				47.3906	-25.4953	12.2		62.4713	-22.68	-9.85272	69.7819	-24.4177	-5.15893	72.0217	-25.9125	2.47282	64.1396	-25.34	-2.93303	66.7618	-30.7648	-1.4407	69.6911	-27.4359	7.67008
49.9649	-27.8763	-19.268	54.7727	-27.41	-1.87569	53.3635	-34.6901	16.4226	52.708	-35.7481	-11.4145				52.8917	-29.4414	13.7568		59.5698	-25.2147	-12.1326	72.8381	-20.9487	-2.20297	71.6866	-25.5821	2.39628	67.61	-24.3463	-0.946126	64.7859	-31.8564	5.41891	67.7851	-28.2643	8.19473
48.5607	-29.2289	-15.2738	53.8557	-26.4468	-1.49706	54.2601	-28.2385	13.0683	50.2466	-35.3521	-8.84033				47.2685	-25.9884	11.9538		68.5118	-24.5582	-11.3281	71.9385	-24.46	-3.06476	71.1792	-22.2448	1.06801	66.4234	-31.1114	-13.4895	66.0527	-29.585	3.39705	67.0859	-30.4415	13.0193
52.8147	-27.6455	-17.7063	56.4888	-27.9332	-0.712858	52.8268	-28.1655	16.6423	53.377	-38.8791	-2.33002				51.2541	-31.2706	7.11917		69.0623	-23.6715	-14.8324	69.9016	-27.6947	-5.1602	71.2648	-27.5459	5.56341	63.7007	-24.6944	-6.56122	66.0621	-32.6436	2.76266	69.1239	-27.9933	6.56054
52.8265	-26.2504	-17.7119	55.3419	-28.398	-0.225165	51.8803	-27.4861	15.8694	51.5542	-31.2617	-14.2408				46.207	-26.9774	12.2976		67.3935	-21.8102	-15.8785	65.9057	-21.8814	-5.65439	69.6828	-24.953	4.74139	70.282	-23.7967	-9.40255	66.8319	-26.8995	7.48495	69.7095	-26.069	7.20917
51.4189	-28.8224	-15.8776	52.5454	-28.4506	0.31103	53.9897	-26.8556	15.8492	49.179	-29.5614	-8.05179				53.4648	-26.761	15.5932		62.3364	-21.4782	-9.08898	70.6566	-24.6865	-5.38424	66.5541	-24.7706	8.55521	63.51	-30.9728	-15.4124	67.4378	-23.3237	6.58872	65.0407	-24.839	5.83616
52.1714	-28.1744	-16.5122	51.4406	-27.7515	1.56003	51.0042	-30.4534	15.9522	52.5686	-29.8182	-12.5044				49.0117	-37.564	12.9254		64.9644	-22.03	-11.8354	74.8928	-24.0639	-5.41345	72.3032	-23.4801	5.52393	63.9037	-25.8006	-3.13251	64.784	-31.7767	5.25487	69.976	-23.8529	2.86188
51.8104	-29.7977	-16.2611	61.7513	-24.8452	-1.57439	50.7078	-30.5301	10.9071	53.4505	-28.7797	-13.3031				54.852	-32.1963	13.5687		68.7487	-24.8941	-14.8821	61.9953	-22.5033	4.50504	72.5417	-22.8625	1.97963	70.0953	-28.2087	-6.72334	65.1595	-31.92	4.77655	68.9208	-27.3854	3.16608
49.1974	-26.3705	-14.007	59.9822	-22.517	-0.352519	59.6697	-26.2418	-1.02501	51.5203	-36.5093	-11.0485				50.2057	-33.7219	10.7028		61.3468	-21.9591	-8.21262	70.5963	-21.8514	-2.59445	71.2964	-27.0673	2.8068	69.6241	-28.8762	-7.33836	69.178	-25.4821	4.80892	66.9111	-24.3243	7.30902
48.3111	-27.7275	-11.0774	58.2496	-27.5282	-1.67172	53.1816	-26.1186	14.4684	52.3674	-32.929	-13.7139				51.3813	-29.7714	5.70736		68.9485	-24.0437	-18.4772	71.254	-25.7679	-4.59832	66.9126	-22.049	5.20501	68.3256	-21.7572	-6.29029	67.1271	-31.0242	5.44644	68.1055	-28.9413	4.82291
47.2141	-27.6128	-23.4197	56.5235	-27.0928	-3.14015	52.9969	-29.942	16.8061	52.2562	-38.1276	-2.90411				50.4597	-32.6904	10.5941		63.5677	-23.4617	-10.5916	71.7878	-24.3325	-5.14977	71.6353	-22.9697	8.37168	68.5006	-24.0789	-5.47269	66.0469	-28.4949	-1.41555	69.2964	-26.0999	6.99079
47.3162	-32.4336	-18.2608	54.8815	-27.9977	18.2368	52.7148	-31.2899	15.8599	51.704	-37.3433	-11.3366				54.5929	-32.1904	12.1133		67.5973	-23.5466	-6.85403	69.3547	-27.6187	-4.93402	67.7226	-25.8344	7.68999	65.2562	-27.0608	-8.16478	68.3637	-26.9633	10.1669	69.9596	-24.1749	5.66947
51.7693	-28.4328	-15.005	51.4793	-28.3629	-3.58529	53.6732	-27.7238	17.1157	52.1213	-37.0719	-10.9994				51.3715	-28.8458	11.4129		64.2067	-22.2484	-10.4314	75.3686	-20.7465	0.114206	63.877	-22.1651	6.27955	70.9159	-26.0892	-7.91995	66.7081	-28.9466	5.40735	70.2474	-24.8325	7.00571
45.7401	-32.5155	-21.5186	60.185	-27.9994	-0.873539	52.7629	-31.5466	17.3603	51.7244	-31.3623	-15.167				45.2884	-26.5533	0.168045		66.0953	-28.683	-11.9162	72.0155	-26.2105	-4.9099	69.6628	-25.1359	1.07142	62.9475	-24.9356	-3.08922	66.4452	-32.0677	4.27287	67.205	-27.4102	-2.04705
55.1252	-25.3237	-3.07171	52.5036	-28.8943	-0.222244	50.5101	-34.3981	16.3541	49.9034	-27.662	-12.933				46.175	-28.2731	11.9325		64.9411	-24.9367	-13.0462	65.9478	-26.0144	-4.59699	74.4336	-22.7003	2.83153	69.6959	-22.6466	-0.186804	67.8965	-26.6804	2.32939	68.9706	-24.5525	7.32963
48.7839	-32.4457	-12.0292	62.3002	-29.3161	-3.00594	52.1255	-29.9975	19.2558	51.506	-40.9222	-8.68871				44.8918	-30.3592	11.1711		70.0389	-26.0816	-13.7978	68.2188	-22.8477	-2.33083	74.7991	-22.97	1.44668	69.4526	-28.4038	-9.1376	67.3757	-32.0223	2.89584	68.7031	-27.0575	7.10412
51.3448	-27.3323	-18.0417	49.0654	-28.6893	-6.95703	54.431	-30.0784	16.2283	54.0195	-28.0953	-13.4907				45.9159	-30.583	9.80834		69.5879	-21.4543	-15.7818	72.1218	-22.4634	-7.56071	72.572	-22.0352	3.62951	64.9575	-27.0646	-9.5013	67.2785	-29.6412	7.17561	68.4525	-27.9851	8.39253
51.6863	-27.6126	-18.8639	54.5616	-28.8155	3.01011	54.4584	-32.5063	11.7703	49.8383	-37.8024	-13.6795				45.3392	-31.4452	9.0288		67.0682	-21.8063	-12.6372	71.0533	-22.6856	-3.07014	72.7708	-21.2495	3.83955	67.5623	-30.7543	-5.58782	68.5658	-26.3729	5.22837	68.1926	-24.534	6.57044
48.374	-31.7961	-13.1345	51.9881	-28.1219	-1.94729	54.584	-28.5175	16.6509	48.5472	-35.5585	-10.8901				46.9001	-33.2861	10.1962		68.1505	-21.581	-16.9109	65.0424	-24.6069	-4.86522	70.5162	-21.7087	5.02444	69.0481	-27.6223	-6.52258	71.1039	-25.3408	-0.16935	69.5991	-24.9365	7.01411
56.5143	-25.2178	-13.6647	51.159	-28.1662	0.35541	50.949	-32.4254	17.2734	55.6869	-32.0666	-8.90852				46.4111	-40.7489	14.0506		69.1311	-22.1498	-12.4543	69.8648	-22.6557	-3.88836	67.6538	-22.3815	5.77621	64.3455	-26.1235	-11.084	65.7458	-29.1135	5.9392	66.4546	-25.4001	8.03515
51.1097	-27.4188	-12.9625	59.8009	-24.98	-3.739	49.4922	-23.9947	17.4536	47.6307	-33.3234	-9.50524				46.2859	-34.756	13.7641		64.8081	-25.5602	-14.9689	65.8072	-20.9597	-3.31022	72.0217	-25.9125	2.47282	69.9913	-28.1293	-8.61734	67.555	-29.9586	4.33668	69.5334	-27.0798	4.59438
49.2607	-29.0492	-10.4706	51.1572	-29.9118	0.790743	54.635	-28.8768	17.8778	51.28	-30.8831	-13.3476				50.3606	-32.2292	14.3226		67.3042	-22.1195	-17.8909	71.1547	-20.5452	-4.95744	71.6866	-25.5821	2.39628	65.6474	-25.0503	-7.5496	65.8423	-30.4652	7.58733	67.5227	-27.2501	7.41976
48.5023	-36.2512	-19.8601	51.6525	-27.3905	-16.7881	60.7355	-26.0869	-2.1608	49.9187	-40.5176	-1.46125				44.9677	-31.8136	3.87435		68.2626	-22.073	-12.6748	68.1563	-23.9203	-6.57138	71.1792	-22.2448	1.06801	69.3842	-28.4513	-7.03929	66.7145	-28.5103	5.46719	69.1215	-24.6582	6.2562
47.4907	-32.8588	-14.8002	52.0139	-30.3563	-0.0754014	48.7491	-30.868	11.1405	48.3863	-37.312	-15.3704				51.4302	-28.0451	12.426		68.9895	-21.8998	-18.7748	67.9969	-20.3815	-2.89307	71.2648	-27.5459	5.56341	67.2716	-25.4678	-7.7917	71.1571	-24.2864	5.21002	66.2234	-25.2104	7.9493
52.9051	-23.4317	-14.9905	57.2076	-27.3841	-2.06381	50.4142	-34.2646	19.0983	48.2118	-32.7466	-9.79712				54.0908	-31.0263	11.9797		59.5553	-22.5062	-13.0932	69.7819	-24.4177	-5.15893	69.6828	-24.953	4.74139	68.3143	-23.6375	-13.2484	68.2244	-32.0198	3.8856	70.5617	-25.7331	6.75226
48.5784	-28.9815	-18.6824	52.0057	-26.5542	1.14986	52.8603	-29.3171	18.3744	51.8642	-39.5145	-12.193				54.1437	-33.1366	14.6375		68.8403	-22.0958	-11.3553	71.9649	-22.6701	-5.08021	66.5541	-24.7706	8.55521	68.2227	-22.0441	-1.04277	67.1453	-32.6444	6.3566	70.2247	-25.3995	13.2731
49.9346	-32.1379	-20.8076	51.3109	-28.2254	0.802119	55.3373	-26.1133	16.2323	53.5777	-29.5373	-12.9329				51.7834	-35.8898	16.3794		63.2248	-22.9024	-9.57957	72.8381	-20.9487	-2.20297	72.3032	-23.4801	5.52393	67.7491	-30.7931	2.52621	67.9411	-23.0068	2.43076	62.5319	-29.6285	10.2337
49.9161	-32.9589	-11.9542	63.6226	-21.4546	-4.01529	47.1724	-33.1254	12.3425	55.4103	-22.6416	-0.13502				47.8935	-40.0722	15.3162		67.2495	-26.0957	-14.2188	71.9385	-24.46	-3.06476	72.5417	-22.8625	1.97963	69.2036	-27.4237	-1.06762	70.306	-24.9351	5.34797	68.5888	-29.3551	7.48823
53.5117	-28.8302	-19.4396	62.8784	-22.9768	-6.2928	52.7863	-30.0979	17.5186	51.9078	-37.5211	-0.424701				44.0352	-31.3818	5.68914		69.6048	-21.0149	-14.3154	69.9016	-27.6947	-5.1602	71.2964	-27.0673	2.8068	59.3136	-26.2926	1.43875	67.2586	-33.0315	2.80992	69.7894	-27.2346	7.72178
49.2592	-32.4927	-20.3996	55.7266	-28.9314	-1.41405	51.4706	-32.37	19.2216	51.9629	-29.8555	-12.6317				53.8082	-31.3017	12.6609		68.8665	-22.2438	-15.5372	65.9057	-21.8814	-5.65439	66.9126	-22.049	5.20501	68.6141	-28.5428	-7.64584	66.3392	-31.5328	6.15862	69.1535	-26.8446	-3.77629
49.8836	-35.0473	-15.1304	51.615	-27.7947	1.00503	47.6717	-37.3121	16.6337	46.5229	-14.657	-2.1737				53.9701	-32.183	10.8494		61.6707	-20.3137	-12.8771	70.6566	-24.6865	-5.38424	71.6353	-22.9697	8.37168	68.7306	-30.4027	-2.31397	72.3242	-25.2917	0.918017	69.3239	-28.2469	5.05131
50.6123	-32.1538	-16.3676	52.1913	-26.4862	0.249105	49.6055	-30.6428	19.408	51.5882	-36.0272	-12.188				54.4483	-26.158	11.3472		66.6505	-23.2874	-16.7568	68.2008	-25.0488	0.381853	67.7226	-25.8344	7.68999	72.1637	-26.166	-6.13749	66.9158	-30.1179	8.86169	70.6189	-24.7739	4.79151
52.767	-26.5105	-17.0383	57.2852	-28.5145	-2.15797	52.808	-28.9311	17.0435	52.2535	-31.614	-14.4991				47.6158	-40.6283	16.3704		69.4843	-24.8947	-14.3783	74.8928	-24.0639	-5.41345	63.877	-22.1651	6.27955	68.4986	-25.8792	0.230943	67.1467	-31.9916	1.50851	69.0325	-23.4313	4.91307
49.6092	-28.9929	-12.7822	64.576	-24.7056	-6.33224	52.4268	-28.7239	18.1982	49.3686	-29.5222	-9.48178				49.3082	-39.0116	15.6117		68.826	-24.3884	-12.1499	61.9953	-22.5033	4.50504	69.6628	-25.1359	1.07142	68.8552	-28.3736	-10.4922	64.4305	-32.9882	6.1609	65.2914	-25.9065	12.0321
50.22	-27.9252	-17.2788	57.9668	-27.3074	-2.07259	52.2717	-31.6391	21.0415	46.3182	-15.084	-2.15643				53.2672	-32.0599	12.7647		67.0819	-21.3883	-18.625	70.5963	-21.8514	-2.59445	66.3268	-22.7072	2.50075	64.1396	-25.34	-2.93303	66.4777	-31.4165	3.68138	64.4494	-31.3713	12.8062
49.0403	-33.2103	-19.5864	57.5807	-25.6819	-3.19091	51.9347	-26.1983	16.4519	53.3236	-36.3178	-11.3944				50.5608	-29.7939	8.02067		68.9247	-24.9875	-14.3212	71.8337	-20.7667	-2.72169	74.4336	-22.7003	2.83153	67.61	-24.3463	-0.946126	70.8128	-29.9859	1.12596	69.6911	-27.4359	7.67008
50.4766	-28.3019	-16.9049	51.3161	-27.8503	0.0471307	54.97	-28.0561	14.3375	52.708	-35.7481	-11.4145				52.5981	-23.6349	8.6058		63.8729	-27.1048	-11.9537	71.254	-25.7679	-4.59832	74.7991	-22.97	1.44668	66.4234	-31.1114	-13.4895	64.6	-33.9825	4.89281	67.7851	-28.2643	8.19473
55.2976	-25.7926	-16.0568	50.1542	-30.0051	3.48878	46.7137	-34.4927	16.1804	50.2466	-35.3521	-8.84033				46.5687	-35.5355	17.915		65.7945	-25.5966	-12.123	71.7878	-24.3325	-5.14977	72.572	-22.0352	3.62951	63.7007	-24.6944	-6.56122	68.7736	-29.2174	3.75242	67.0859	-30.4415	13.0193
48.0916	-34.2644	-13.8372	63.4942	-21.2417	-4.56941	53.3635	-34.6901	16.4226	52.328	-23.84	-6.14177				48.4997	-42.6009	13.1993		62.4713	-22.68	-9.85272	69.3547	-27.6187	-4.93402	72.7708	-21.2495	3.83955	70.282	-23.7967	-9.40255	64.1419	-31.6902	4.72166	69.1239	-27.9933	6.56054
49.539	-30.3895	-12.5976	60.1719	-25.0527	0.861168	54.2601	-28.2385	13.0683	53.377	-38.8791	-2.33002				49.6577	-39.1072	13.6769		70.8999	-24.0268	-14.1248	73.398	-22.5761	-4.68384	70.5162	-21.7087	5.02444	63.51	-30.9728	-15.4124	66.0211	-29.8104	3.47874	69.7095	-26.069	7.20917
50.883	-29.4469	-18.1168	51.3676	-27.5352	0.409301	52.8268	-28.1655	16.6423	51.5542	-31.2617	-14.2408				48.9272	-33.1954	8.75726		59.5698	-25.2147	-12.1326	75.3686	-20.7465	0.114206	71.9918	-22.1306	-6.66692	63.9037	-25.8006	-3.13251	69.6033	-29.3302	3.70294	65.0407	-24.839	5.83616
48.711	-30.876	-21.6536	53.1996	-26.2891	-4.03733	51.8803	-27.4861	15.8694	49.179	-29.5614	-8.05179				53.8945	-25.6657	9.11714		68.5118	-24.5582	-11.3281	72.0155	-26.2105	-4.9099	67.6538	-22.3815	5.77621	68.2251	-26.6241	-9.05854	67.8031	-31.5221	2.31432	69.976	-23.8529	2.86188
50.5949	-26.2853	-17.2699	62.1392	-25.5486	-3.33048	53.9897	-26.8556	15.8492	53.5995	-23.5718	-4.04514				48.326	-34.2947	17.4685		69.0623	-23.6715	-14.8324	65.9478	-26.0144	-4.59699	72.0217	-25.9125	2.47282	70.0953	-28.2087	-6.72334	67.7307	-27.0839	6.27349	68.9208	-27.3854	3.16608
52.557	-26.3794	-15.6126	52.7483	-27.3712	0.491567	51.0042	-30.4534	15.9522	52.5686	-29.8182	-12.5044				47.9701	-43.2921	13.1864		67.3935	-21.8102	-15.8785	68.2188	-22.8477	-2.33083	71.6866	-25.5821	2.39628	69.6241	-28.8762	-7.33836	67.4137	-29.4197	5.94469	66.9111	-24.3243	7.30902
49.1383	-28.9006	-18.5149	54.7727	-27.41	-1.87569	50.7078	-30.5301	10.9071	53.4505	-28.7797	-13.3031				52.2991	-34.3862	11.2366		64.9974	-24.2003	-13.681	72.1218	-22.4634	-7.56071	71.1792	-22.2448	1.06801	68.3256	-21.7572	-6.29029	70.4635	-29.2647	4.12427	69.5381	-25.5061	4.31023
51.1393	-27.5282	-17.4809	53.8557	-26.4468	-1.49706	59.6697	-26.2418	-1.02501	51.5203	-36.5093	-11.0485				52.0794	-31.234	12.6461		62.3364	-21.4782	-9.08898	71.0533	-22.6856	-3.07014	70.139	-27.4313	4.09255	68.5006	-24.0789	-5.47269	68.2965	-33.0543	4.58119	68.1055	-28.9413	4.82291
48.3121	-33.0036	-10.7396	56.4888	-27.9332	-0.712858	53.1816	-26.1186	14.4684	52.3838	-23.9504	-5.01456				51.5605	-36.7412	13.946		64.9644	-22.03	-11.8354	65.0424	-24.6069	-4.86522	71.2648	-27.5459	5.56341	66.5435	-31.0526	-7.11809	66.6388	-33.0395	1.48123	69.2964	-26.0999	6.99079
51.9974	-25.5381	-14.8793	51.1096	-28.0855	1.30487	52.9969	-29.942	16.8061	52.3674	-32.929	-13.7139				47.3906	-25.4953	12.2		71.2969	-24.9685	-10.6231	69.8648	-22.6557	-3.88836	69.6828	-24.953	4.74139	65.2562	-27.0608	-8.16478	65.6838	-32.9613	7.3676	69.9596	-24.1749	5.66947
50.8171	-26.518	-17.6911	55.3419	-28.398	-0.225165	52.7148	-31.2899	15.8599	52.2562	-38.1276	-2.90411				52.8917	-29.4414	13.7568		68.7487	-24.8941	-14.8821	66.9422	-24.6289	-5.06129	66.5541	-24.7706	8.55521	70.9159	-26.0892	-7.91995	67.5437	-29.3438	2.2412	70.2474	-24.8325	7.00571
52.0679	-27.4518	-18.0964	52.5454	-28.4506	0.31103	53.6732	-27.7238	17.1157	51.704	-37.3433	-11.3366				54.1408	-24.2295	9.87565		61.3468	-21.9591	-8.21262	65.8072	-20.9597	-3.31022	70.2923	-24.2754	5.91828	62.9475	-24.9356	-3.08922	67.2939	-31.8285	4.73826	67.205	-27.4102	-2.04705
50.9745	-28.6456	-18.6928	51.4406	-27.7515	1.56003	52.7629	-31.5466	17.3603	51.8858	-35.1681	-10.8532				47.2685	-25.9884	11.9538		68.9485	-24.0437	-18.4772	71.1547	-20.5452	-4.95744	72.3032	-23.4801	5.52393	69.6959	-22.6466	-0.186804	68.312	-31.3723	2.76919	68.9706	-24.5525	7.32963
48.3201	-31.8225	-19.2924	61.7513	-24.8452	-1.57439	50.5101	-34.3981	16.3541	52.1213	-37.0719	-10.9994				51.2541	-31.2706	7.11917		63.5677	-23.4617	-10.5916	68.1563	-23.9203	-6.57138	72.5417	-22.8625	1.97963	66.5493	-24.2004	-11.4373	68.9012	-31.4187	-3.51186	68.7031	-27.0575	7.10412
51.3647	-26.677	-18.8459	59.9822	-22.517	-0.352519	52.1255	-29.9975	19.2558	51.7244	-31.3623	-15.167				52.107	-24.4076	9.91709		67.5973	-23.5466	-6.85403	67.9969	-20.3815	-2.89307	71.1624	-27.8017	4.942	69.4526	-28.4038	-9.1376	65.9105	-32.2998	3.75011	68.4525	-27.9851	8.39253
48.0247	-31.9469	-11.1319	58.2496	-27.5282	-1.67172	54.431	-30.0784	16.2283	49.9034	-27.662	-12.933				46.207	-26.9774	12.2976		64.2067	-22.2484	-10.4314	69.7819	-24.4177	-5.15893	71.2964	-27.0673	2.8068	64.9575	-27.0646	-9.5013	68.4112	-32.0479	0.708007	68.1926	-24.534	6.57044
49.5324	-29.1618	-18.8372	56.5235	-27.0928	-3.14015	54.4584	-32.5063	11.7703	57.7099	-29.2735	-11.3284				53.4648	-26.761	15.5932		66.0953	-28.683	-11.9162	71.9649	-22.6701	-5.08021	66.9126	-22.049	5.20501	67.5623	-30.7543	-5.58782	68.5729	-29.5051	3.19778	69.5991	-24.9365	7.01411
49.5458	-27.2748	-18.4357				54.584	-28.5175	16.6509	51.506	-40.9222	-8.68871				52.7169	-31.0826	12.0887		64.9411	-24.9367	-13.0462	70.6681	-25.4427	-4.54362	71.6353	-22.9697	8.37168	69.0481	-27.6223	-6.52258	66.7618	-30.7648	-1.4407	66.4546	-25.4001	8.03515
49.9649	-27.8763	-19.268				50.949	-32.4254	17.2734	54.0195	-28.0953	-13.4907				49.0117	-37.564	12.9254		70.0389	-26.0816	-13.7978	72.8381	-20.9487	-2.20297	67.7226	-25.8344	7.68999	66.2049	-32.9029	-11.3333	64.7859	-31.8564	5.41891	65.6403	-21.5517	9.35015
48.5607	-29.2289	-15.2738				49.4922	-23.9947	17.4536	49.8383	-37.8024	-13.6795				54.852	-32.1963	13.5687		69.5879	-21.4543	-15.7818	71.9385	-24.46	-3.06476	63.877	-22.1651	6.27955	64.3455	-26.1235	-11.084	66.0527	-29.585	3.39705	69.5334	-27.0798	4.59438
52.8147	-27.6455	-17.7063				54.635	-28.8768	17.8778	54.1337	-19.4431	-4.29386				50.2667	-32.5037	6.26479		67.0682	-21.8063	-12.6372	69.9016	-27.6947	-5.1602	69.6628	-25.1359	1.07142	69.9913	-28.1293	-8.61734	66.0621	-32.6436	2.76266	67.5227	-27.2501	7.41976
52.8265	-26.2504	-17.7119				60.7355	-26.0869	-2.1608	48.5472	-35.5585	-10.8901				50.2057	-33.7219	10.7028		68.1505	-21.581	-16.9109	65.9057	-21.8814	-5.65439	66.3268	-22.7072	2.50075	65.6474	-25.0503	-7.5496	66.8319	-26.8995	7.48495	69.1215	-24.6582	6.2562
51.4189	-28.8224	-15.8776				48.7491	-30.868	11.1405	55.6869	-32.0666	-8.90852				51.3813	-29.7714	5.70736		69.1311	-22.1498	-12.4543	70.6566	-24.6865	-5.38424	71.6585	-24.5078	3.39539	69.3842	-28.4513	-7.03929	67.4378	-23.3237	6.58872	66.2234	-25.2104	7.9493
52.1714	-28.1744	-16.5122				50.4142	-34.2646	19.0983	47.6307	-33.3234	-9.50524				49.7608	-27.8633	9.55297		64.8081	-25.5602	-14.9689	68.2008	-25.0488	0.381853	74.4336	-22.7003	2.83153	69.9107	-25.4771	-7.04739	64.784	-31.7767	5.25487	69.6906	-24.1974	6.47857
51.8104	-29.7977	-16.2611				52.8603	-29.3171	18.3744	53.7229	-22.3877	-7.10462				50.4597	-32.6904	10.5941		67.3042	-22.1195	-17.8909	71.5115	-20.9155	-4.46225	74.7991	-22.97	1.44668	67.2716	-25.4678	-7.7917	65.1595	-31.92	4.77655	70.5617	-25.7331	6.75226
49.3294	-30.4619	-11.8519				55.3373	-26.1133	16.2323	51.28	-30.8831	-13.3476				54.5929	-32.1904	12.1133		68.2626	-22.073	-12.6748	74.8928	-24.0639	-5.41345	72.572	-22.0352	3.62951	68.3143	-23.6375	-13.2484	69.178	-25.4821	4.80892	70.2247	-25.3995	13.2731
49.1974	-26.3705	-14.007				47.1724	-33.1254	12.3425	49.9187	-40.5176	-1.46125				51.7228	-32.9433	11.5909		68.9895	-21.8998	-18.7748	61.9953	-22.5033	4.50504	72.7708	-21.2495	3.83955	68.2227	-22.0441	-1.04277	67.1271	-31.0242	5.44644	62.5319	-29.6285	10.2337
48.3111	-27.7275	-11.0774				52.7863	-30.0979	17.5186	52.4759	-27.6052	-7.94584				51.3715	-28.8458	11.4129		59.5553	-22.5062	-13.0932	70.5963	-21.8514	-2.59445	70.5162	-21.7087	5.02444	67.7491	-30.7931	2.52621	66.0469	-28.4949	-1.41555	68.5888	-29.3551	7.48823
47.2141	-27.6128	-23.4197				51.4706	-32.37	19.2216	48.3863	-37.312	-15.3704				45.2884	-26.5533	0.168045		68.8403	-22.0958	-11.3553	71.8337	-20.7667	-2.72169	71.9918	-22.1306	-6.66692	68.0128	-29.1109	-0.611236	68.3637	-26.9633	10.1669	69.7894	-27.2346	7.72178
47.3162	-32.4336	-18.2608				47.6717	-37.3121	16.6337	48.2118	-32.7466	-9.79712				51.5773	-26.3558	12.807		63.2248	-22.9024	-9.57957	71.8156	-25.1942	-3.15588	70.879	-26.9083	4.71298	69.2036	-27.4237	-1.06762	66.7081	-28.9466	5.40735	69.1535	-26.8446	-3.77629
52.2349	-26.1647	-15.657				49.6055	-30.6428	19.408	53.9881	-23.3983	-4.58591				46.175	-28.2731	11.9325		67.2495	-26.0957	-14.2188	71.254	-25.7679	-4.59832	67.6538	-22.3815	5.77621	63.6483	-24.975	-7.30154	66.4452	-32.0677	4.27287	69.3239	-28.2469	5.05131
51.7693	-28.4328	-15.005				52.808	-28.9311	17.0435	51.8642	-39.5145	-12.193				44.8918	-30.3592	11.1711		69.6048	-21.0149	-14.3154	71.7878	-24.3325	-5.14977	72.0217	-25.9125	2.47282	59.3136	-26.2926	1.43875	67.8965	-26.6804	2.32939	70.6189	-24.7739	4.79151
45.7401	-32.5155	-21.5186				52.4268	-28.7239	18.1982	53.5777	-29.5373	-12.9329				45.9159	-30.583	9.80834		68.8665	-22.2438	-15.5372	69.3547	-27.6187	-4.93402	71.6866	-25.5821	2.39628	63.3682	-25.9587	-13.698	67.3757	-32.0223	2.89584	69.0325	-23.4313	4.91307
55.1252	-25.3237	-3.07171				52.2717	-31.6391	21.0415	44.6234	-18.4874	0.518517				45.3392	-31.4452	9.0288		61.6707	-20.3137	-12.8771	73.398	-22.5761	-4.68384	71.1792	-22.2448	1.06801	68.6141	-28.5428	-7.64584	67.2785	-29.6412	7.17561	65.2914	-25.9065	12.0321
48.7839	-32.4457	-12.0292				51.9347	-26.1983	16.4519	48.3766	-32.8134	-11.735				46.9001	-33.2861	10.1962		66.6505	-23.2874	-16.7568	70.5811	-21.0697	-3.19189	70.139	-27.4313	4.09255	68.7306	-30.4027	-2.31397	68.5658	-26.3729	5.22837	64.4494	-31.3713	12.8062
51.5603	-29.6304	-18.3624				54.97	-28.0561	14.3375	53.1996	-24.5203	-6.18537				46.4111	-40.7489	14.0506		69.4843	-24.8947	-14.3783	75.3686	-20.7465	0.114206	72.1735	-22.1541	5.24492	72.1637	-26.166	-6.13749	71.1039	-25.3408	-0.16935	69.6911	-27.4359	7.67008
51.3448	-27.3323	-18.0417				46.7137	-34.4927	16.1804	52.0584	-24.7127	-8.0921				46.2859	-34.756	13.7641		68.826	-24.3884	-12.1499	72.0155	-26.2105	-4.9099	71.2648	-27.5459	5.56341	68.4986	-25.8792	0.230943	65.7458	-29.1135	5.9392	67.7851	-28.2643	8.19473
51.6863	-27.6126	-18.8639				53.3635	-34.6901	16.4226	54.406	-29.0894	-7.33539				50.3606	-32.2292	14.3226		67.0819	-21.3883	-18.625	70.4914	-26.7905	-5.17533	69.6828	-24.953	4.74139	68.8552	-28.3736	-10.4922	67.555	-29.9586	4.33668	67.0859	-30.4415	13.0193
48.374	-31.7961	-13.1345				54.2601	-28.2385	13.0683	55.1349	-16.355	-2.8034				44.9677	-31.8136	3.87435		68.9247	-24.9875	-14.3212	70.949	-27.558	-3.02233	66.5541	-24.7706	8.55521	64.1396	-25.34	-2.93303	65.8423	-30.4652	7.58733	69.1239	-27.9933	6.56054
56.5143	-25.2178	-13.6647				52.8268	-28.1655	16.6423	53.6827	-23.3025	-9.1119				51.4302	-28.0451	12.426		63.8729	-27.1048	-11.9537	65.9478	-26.0144	-4.59699	70.2923	-24.2754	5.91828	67.61	-24.3463	-0.946126	66.7145	-28.5103	5.46719	69.7095	-26.069	7.20917
48.5681	-33.1008	-19.6194				51.8803	-27.4861	15.8694	50.281	-32.6605	-7.75377				54.0908	-31.0263	11.9797		65.7945	-25.5966	-12.123	68.2188	-22.8477	-2.33083	71.877	-26.5855	3.63413	65.868	-24.764	-6.40565	71.1571	-24.2864	5.21002	65.0407	-24.839	5.83616
51.1097	-27.4188	-12.9625				53.9897	-26.8556	15.8492	53.9273	-17.5637	-2.46738				54.1437	-33.1366	14.6375		62.4713	-22.68	-9.85272	72.1218	-22.4634	-7.56071	72.3032	-23.4801	5.52393	66.4234	-31.1114	-13.4895	68.2244	-32.0198	3.8856	69.976	-23.8529	2.86188
49.2607	-29.0492	-10.4706				51.0042	-30.4534	15.9522	48.5846	-30.461	-8.38989				53.6664	-32.1649	13.9188		70.8999	-24.0268	-14.1248	71.0533	-22.6856	-3.07014	72.5417	-22.8625	1.97963	63.7007	-24.6944	-6.56122	67.1453	-32.6444	6.3566	68.9208	-27.3854	3.16608
48.5023	-36.2512	-19.8601				50.7078	-30.5301	10.9071	54.0022	-26.4349	-10.9284				51.7834	-35.8898	16.3794		59.5698	-25.2147	-12.1326	65.0424	-24.6069	-4.86522	71.1624	-27.8017	4.942	70.282	-23.7967	-9.40255	67.9411	-23.0068	2.43076	66.9111	-24.3243	7.30902
47.4907	-32.8588	-14.8002				59.6697	-26.2418	-1.02501	55.4103	-22.6416	-0.13502				47.8935	-40.0722	15.3162		68.5118	-24.5582	-11.3281	69.8648	-22.6557	-3.88836	69.137	-28.226	13.7508	63.51	-30.9728	-15.4124	70.306	-24.9351	5.34797	69.5381	-25.5061	4.31023
49.2276	-30.2103	-11.4568				53.1816	-26.1186	14.4684	51.9078	-37.5211	-0.424701				44.0352	-31.3818	5.68914		69.0623	-23.6715	-14.8324	66.9422	-24.6289	-5.06129	71.2964	-27.0673	2.8068	63.9037	-25.8006	-3.13251	67.2586	-33.0315	2.80992	66.2651	-25.6698	4.62136
52.9051	-23.4317	-14.9905				52.9969	-29.942	16.8061	51.9629	-29.8555	-12.6317				53.8082	-31.3017	12.6609		67.3935	-21.8102	-15.8785	65.8072	-20.9597	-3.31022	66.9126	-22.049	5.20501	68.2251	-26.6241	-9.05854	66.3392	-31.5328	6.15862	68.1055	-28.9413	4.82291
48.5784	-28.9815	-18.6824				52.7148	-31.2899	15.8599	46.5229	-14.657	-2.1737				53.9701	-32.183	10.8494		64.9974	-24.2003	-13.681	71.1547	-20.5452	-4.95744	71.6353	-22.9697	8.37168	68.2255	-24.1623	-1.35295	72.3242	-25.2917	0.918017	69.2964	-26.0999	6.99079
49.9346	-32.1379	-20.8076				53.6732	-27.7238	17.1157	51.5882	-36.0272	-12.188				54.4483	-26.158	11.3472		62.3364	-21.4782	-9.08898	68.1563	-23.9203	-6.57138	67.7226	-25.8344	7.68999	70.0953	-28.2087	-6.72334	66.9158	-30.1179	8.86169	69.9596	-24.1749	5.66947
49.9161	-32.9589	-11.9542				52.7629	-31.5466	17.3603	52.2535	-31.614	-14.4991				54.2113	-32.4288	14.1003		64.9644	-22.03	-11.8354	67.9969	-20.3815	-2.89307	63.877	-22.1651	6.27955	69.6241	-28.8762	-7.33836	67.1467	-31.9916	1.50851	70.2474	-24.8325	7.00571
48.0593	-32.7033	-14.3924				50.5101	-34.3981	16.3541	49.3686	-29.5222	-9.48178				47.6158	-40.6283	16.3704		71.2969	-24.9685	-10.6231	69.7819	-24.4177	-5.15893	69.6628	-25.1359	1.07142	68.3256	-21.7572	-6.29029	64.4305	-32.9882	6.1609	67.205	-27.4102	-2.04705
53.5117	-28.8302	-19.4396				52.1255	-29.9975	19.2558	46.3182	-15.084	-2.15643				49.3082	-39.0116	15.6117		68.7487	-24.8941	-14.8821	71.9649	-22.6701	-5.08021	66.3268	-22.7072	2.50075	68.5006	-24.0789	-5.47269	66.4777	-31.4165	3.68138	68.9706	-24.5525	7.32963
49.2592	-32.4927	-20.3996				54.431	-30.0784	16.2283	53.3236	-36.3178	-11.3944				53.2672	-32.0599	12.7647		61.3468	-21.9591	-8.21262	70.6681	-25.4427	-4.54362	71.6585	-24.5078	3.39539	66.5435	-31.0526	-7.11809	70.8128	-29.9859	1.12596	66.2579	-26.0416	11.9736
49.8836	-35.0473	-15.1304				54.4584	-32.5063	11.7703	52.708	-35.7481	-11.4145				50.5608	-29.7939	8.02067		68.9485	-24.0437	-18.4772	72.8381	-20.9487	-2.20297	74.4336	-22.7003	2.83153	65.2562	-27.0608	-8.16478	64.6	-33.9825	4.89281	68.7031	-27.0575	7.10412
50.6123	-32.1538	-16.3676				54.584	-28.5175	16.6509	50.2466	-35.3521	-8.84033				52.5981	-23.6349	8.6058		63.5677	-23.4617	-10.5916	71.9385	-24.46	-3.06476	74.7991	-22.97	1.44668	70.9159	-26.0892	-7.91995	68.7736	-29.2174	3.75242	68.4525	-27.9851	8.39253
50.0508	-32.817	-13.427				50.949	-32.4254	17.2734	52.328	-23.84	-6.14177				55.4953	-28.904	12.8233		67.5973	-23.5466	-6.85403	69.9016	-27.6947	-5.1602	72.572	-22.0352	3.62951	62.9475	-24.9356	-3.08922	64.1419	-31.6902	4.72166	68.1926	-24.534	6.57044
52.767	-26.5105	-17.0383				49.4922	-23.9947	17.4536	53.377	-38.8791	-2.33002				46.5687	-35.5355	17.915		64.2067	-22.2484	-10.4314	65.9057	-21.8814	-5.65439	72.7708	-21.2495	3.83955	69.6959	-22.6466	-0.186804	66.0211	-29.8104	3.47874	69.5991	-24.9365	7.01411
49.6092	-28.9929	-12.7822				54.635	-28.8768	17.8778	51.5542	-31.2617	-14.2408				48.4997	-42.6009	13.1993		66.0953	-28.683	-11.9162	70.6566	-24.6865	-5.38424	70.5162	-21.7087	5.02444	66.5493	-24.2004	-11.4373	69.6033	-29.3302	3.70294	66.4546	-25.4001	8.03515
50.22	-27.9252	-17.2788				60.7355	-26.0869	-2.1608	49.179	-29.5614	-8.05179				49.6577	-39.1072	13.6769		64.9411	-24.9367	-13.0462	68.2008	-25.0488	0.381853	71.9918	-22.1306	-6.66692	63.8507	-27.3192	-8.35449	67.8031	-31.5221	2.31432	65.6403	-21.5517	9.35015
49.0403	-33.2103	-19.5864				48.7491	-30.868	11.1405	53.5995	-23.5718	-4.04514				48.9272	-33.1954	8.75726		70.0389	-26.0816	-13.7978	71.5115	-20.9155	-4.46225	70.879	-26.9083	4.71298	69.4526	-28.4038	-9.1376	67.7307	-27.0839	6.27349	68.2689	-24.8832	10.4087
49.158	-29.5348	-12.7696				50.4142	-34.2646	19.0983	52.5686	-29.8182	-12.5044				53.8945	-25.6657	9.11714		67.32	-25.7473	-13.7934	74.8928	-24.0639	-5.41345	73.512	-21.0582	5.20317	64.9575	-27.0646	-9.5013	67.4137	-29.4197	5.94469	69.5334	-27.0798	4.59438
50.4766	-28.3019	-16.9049				52.8603	-29.3171	18.3744	53.4505	-28.7797	-13.3031				50.238	-22.9006	12.814		69.5879	-21.4543	-15.7818	61.9953	-22.5033	4.50504	67.6538	-22.3815	5.77621	67.5623	-30.7543	-5.58782	70.4635	-29.2647	4.12427	67.5227	-27.2501	7.41976
55.2976	-25.7926	-16.0568				55.3373	-26.1133	16.2323	51.5203	-36.5093	-11.0485				48.326	-34.2947	17.4685		67.0682	-21.8063	-12.6372	70.5963	-21.8514	-2.59445	72.0217	-25.9125	2.47282	69.0481	-27.6223	-6.52258	68.2965	-33.0543	4.58119	69.1215	-24.6582	6.2562
48.0916	-34.2644	-13.8372				47.1724	-33.1254	12.3425	52.3838	-23.9504	-5.01456				47.9701	-43.2921	13.1864		68.1505	-21.581	-16.9109	71.8337	-20.7667	-2.72169	71.6866	-25.5821	2.39628	66.2049	-32.9029	-11.3333	66.6388	-33.0395	1.48123	66.2234	-25.2104	7.9493
49.539	-30.3895	-12.5976				52.7863	-30.0979	17.5186	52.3674	-32.929	-13.7139				52.2991	-34.3862	11.2366		69.1311	-22.1498	-12.4543	71.8156	-25.1942	-3.15588	71.1792	-22.2448	1.06801	64.3455	-26.1235	-11.084	65.6838	-32.9613	7.3676	69.6906	-24.1974	6.47857
48.9378	-32.3736	-15.2018				51.4706	-32.37	19.2216	52.2562	-38.1276	-2.90411				52.0794	-31.234	12.6461		64.8081	-25.5602	-14.9689	71.254	-25.7679	-4.59832	70.139	-27.4313	4.09255	69.9913	-28.1293	-8.61734	67.5437	-29.3438	2.2412	68.0923	-22.2494	7.08009
50.883	-29.4469	-18.1168				47.6717	-37.3121	16.6337	51.704	-37.3433	-11.3366				52.0531	-33.0815	13.5222		67.3042	-22.1195	-17.8909	71.7878	-24.3325	-5.14977	72.1735	-22.1541	5.24492	65.6474	-25.0503	-7.5496	67.2939	-31.8285	4.73826	70.5617	-25.7331	6.75226
48.711	-30.876	-21.6536				49.6055	-30.6428	19.408	51.8858	-35.1681	-10.8532				51.5605	-36.7412	13.946		67.9886	-23.3274	-15.5936	69.3547	-27.6187	-4.93402	71.8308	-20.7692	4.25935	69.3842	-28.4513	-7.03929	68.312	-31.3723	2.76919	70.2247	-25.3995	13.2731
50.5949	-26.2853	-17.2699				52.808	-28.9311	17.0435	52.1213	-37.0719	-10.9994				47.3906	-25.4953	12.2		68.2626	-22.073	-12.6748	73.398	-22.5761	-4.68384	71.2648	-27.5459	5.56341	69.9107	-25.4771	-7.04739	68.9012	-31.4187	-3.51186	68.3681	-22.5416	7.40539
52.557	-26.3794	-15.6126				52.4268	-28.7239	18.1982	51.7244	-31.3623	-15.167				52.8917	-29.4414	13.7568		68.9895	-21.8998	-18.7748	70.5811	-21.0697	-3.19189	69.6828	-24.953	4.74139	67.2716	-25.4678	-7.7917	65.9105	-32.2998	3.75011	62.5319	-29.6285	10.2337
48.081	-32.6848	-14.512				52.2717	-31.6391	21.0415	49.9034	-27.662	-12.933				54.1408	-24.2295	9.87565		59.5553	-22.5062	-13.0932	75.3686	-20.7465	0.114206	66.5541	-24.7706	8.55521	68.3143	-23.6375	-13.2484	68.4112	-32.0479	0.708007	68.5888	-29.3551	7.48823
49.1383	-28.9006	-18.5149				51.9347	-26.1983	16.4519	57.7099	-29.2735	-11.3284				52.0007	-34.1631	9.49947		68.8403	-22.0958	-11.3553	72.0155	-26.2105	-4.9099	70.2923	-24.2754	5.91828	68.2227	-22.0441	-1.04277	68.5729	-29.5051	3.19778	66.7544	-21.5782	8.74926
51.1393	-27.5282	-17.4809				54.97	-28.0561	14.3375	51.506	-40.9222	-8.68871				47.2685	-25.9884	11.9538		63.2248	-22.9024	-9.57957	70.4914	-26.7905	-5.17533	71.877	-26.5855	3.63413	67.7491	-30.7931	2.52621	66.7618	-30.7648	-1.4407	69.7894	-27.2346	7.72178
48.3121	-33.0036	-10.7396				46.7137	-34.4927	16.1804	54.0195	-28.0953	-13.4907				51.2541	-31.2706	7.11917		67.2495	-26.0957	-14.2188	70.949	-27.558	-3.02233	72.0787	-23.8376	6.02663	68.0128	-29.1109	-0.611236	64.7859	-31.8564	5.41891	69.1535	-26.8446	-3.77629
51.9974	-25.5381	-14.8793				53.3635	-34.6901	16.4226	49.8383	-37.8024	-13.6795				52.107	-24.4076	9.91709		69.857	-22.4388	-16.4292	65.9478	-26.0144	-4.59699	72.3032	-23.4801	5.52393	69.2036	-27.4237	-1.06762	66.0527	-29.585	3.39705	67.1156	-21.5567	8.02248
48.6859	-34.8538	-19.8697				54.2601	-28.2385	13.0683	54.1337	-19.4431	-4.29386				53.9327	-27.6687	10.658		69.6048	-21.0149	-14.3154	68.2188	-22.8477	-2.33083	72.5417	-22.8625	1.97963	63.6483	-24.975	-7.30154	66.0621	-32.6436	2.76266	69.3239	-28.2469	5.05131
50.8171	-26.518	-17.6911				52.8268	-28.1655	16.6423	48.5472	-35.5585	-10.8901				46.207	-26.9774	12.2976		68.8665	-22.2438	-15.5372	72.1218	-22.4634	-7.56071	71.1624	-27.8017	4.942	59.3136	-26.2926	1.43875	66.8319	-26.8995	7.48495	70.6189	-24.7739	4.79151
52.0679	-27.4518	-18.0964				51.8803	-27.4861	15.8694	55.6869	-32.0666	-8.90852				53.4648	-26.761	15.5932		61.6707	-20.3137	-12.8771	71.0533	-22.6856	-3.07014	69.137	-28.226	13.7508	63.3682	-25.9587	-13.698	67.4378	-23.3237	6.58872	69.0325	-23.4313	4.91307
50.9745	-28.6456	-18.6928				55.6896	-24.586	16.4611	47.6307	-33.3234	-9.50524				52.7169	-31.0826	12.0887		66.6505	-23.2874	-16.7568	65.0424	-24.6069	-4.86522	73.9012	-21.4978	5.32974	68.6141	-28.5428	-7.64584	64.784	-31.7767	5.25487	65.2914	-25.9065	12.0321
48.3201	-31.8225	-19.2924				53.9897	-26.8556	15.8492	53.7229	-22.3877	-7.10462				53.2287	-29.3486	13.0806		69.4843	-24.8947	-14.3783	69.8648	-22.6557	-3.88836	71.2964	-27.0673	2.8068	68.7306	-30.4027	-2.31397	65.1595	-31.92	4.77655	64.4494	-31.3713	12.8062
48.914	-33.5757	-12.7966				51.0042	-30.4534	15.9522	51.28	-30.8831	-13.3476				49.0117	-37.564	12.9254		74.046	-21.9169	-2.91831	66.9422	-24.6289	-5.06129	66.9126	-22.049	5.20501	72.1637	-26.166	-6.13749	69.178	-25.4821	4.80892	69.6911	-27.4359	7.67008
51.3647	-26.677	-18.8459				50.7078	-30.5301	10.9071	49.9187	-40.5176	-1.46125				54.852	-32.1963	13.5687		68.826	-24.3884	-12.1499	65.8072	-20.9597	-3.31022	71.6353	-22.9697	8.37168	68.4986	-25.8792	0.230943	67.1271	-31.0242	5.44644	67.7851	-28.2643	8.19473
48.0247	-31.9469	-11.1319				54.5709	-24.5346	17.6446	52.4759	-27.6052	-7.94584				50.2667	-32.5037	6.26479		67.0819	-21.3883	-18.625	71.1547	-20.5452	-4.95744	67.7226	-25.8344	7.68999	68.8552	-28.3736	-10.4922	66.0469	-28.4949	-1.41555	67.0859	-30.4415	13.0193
49.5324	-29.1618	-18.8372				59.6697	-26.2418	-1.02501	48.3863	-37.312	-15.3704				53.0293	-31.7153	12.3021		68.9247	-24.9875	-14.3212	68.1563	-23.9203	-6.57138	63.877	-22.1651	6.27955	64.1396	-25.34	-2.93303	68.3637	-26.9633	10.1669	69.1239	-27.9933	6.56054
54.6295	-27.4033	-14.197				53.1816	-26.1186	14.4684	48.2118	-32.7466	-9.79712				50.2057	-33.7219	10.7028		63.8729	-27.1048	-11.9537	67.9969	-20.3815	-2.89307	69.6628	-25.1359	1.07142	67.61	-24.3463	-0.946126	66.7081	-28.9466	5.40735	69.7095	-26.069	7.20917
49.5458	-27.2748	-18.4357				52.9969	-29.942	16.8061	53.9881	-23.3983	-4.58591				51.3813	-29.7714	5.70736		65.7945	-25.5966	-12.123	69.7819	-24.4177	-5.15893	66.3268	-22.7072	2.50075	65.868	-24.764	-6.40565	66.4452	-32.0677	4.27287	65.0407	-24.839	5.83616
49.9649	-27.8763	-19.268				56.8743	-24.431	17.5759	51.8642	-39.5145	-12.193				49.7608	-27.8633	9.55297		62.4713	-22.68	-9.85272	71.9649	-22.6701	-5.08021	71.6585	-24.5078	3.39539	66.7843	-27.0723	-8.10253	67.8965	-26.6804	2.32939	69.976	-23.8529	2.86188
50.1171	-34.3486	-16.4954				52.7148	-31.2899	15.8599	53.5777	-29.5373	-12.9329				53.2872	-30.9913	13.0275		70.8999	-24.0268	-14.1248	70.6681	-25.4427	-4.54362	65.8782	-21.4738	2.78382	66.4234	-31.1114	-13.4895	67.3757	-32.0223	2.89584	68.9208	-27.3854	3.16608
48.5607	-29.2289	-15.2738				53.6732	-27.7238	17.1157	44.6234	-18.4874	0.518517				50.4597	-32.6904	10.5941		59.5698	-25.2147	-12.1326	72.8381	-20.9487	-2.20297	74.4336	-22.7003	2.83153	63.7007	-24.6944	-6.56122	67.2785	-29.6412	7.17561	66.9111	-24.3243	7.30902
52.8147	-27.6455	-17.7063				52.7629	-31.5466	17.3603	48.3766	-32.8134	-11.735				54.5929	-32.1904	12.1133		68.5118	-24.5582	-11.3281	71.9385	-24.46	-3.06476	74.7991	-22.97	1.44668	70.282	-23.7967	-9.40255	68.5658	-26.3729	5.22837	69.5381	-25.5061	4.31023
58.9064	-21.3163	-4.39237				50.647	-29.0892	20.1676	53.1996	-24.5203	-6.18537				51.7228	-32.9433	11.5909		69.0623	-23.6715	-14.8324	69.9016	-27.6947	-5.1602	72.572	-22.0352	3.62951	63.51	-30.9728	-15.4124	71.1039	-25.3408	-0.16935	66.2651	-25.6698	4.62136
52.8265	-26.2504	-17.7119				50.5101	-34.3981	16.3541	52.0584	-24.7127	-8.0921				52.3374	-28.8199	12.3496		67.3935	-21.8102	-15.8785	65.9057	-21.8814	-5.65439	72.7708	-21.2495	3.83955	63.9037	-25.8006	-3.13251	65.7458	-29.1135	5.9392	68.6718	-23.8976	3.30567
51.4189	-28.8224	-15.8776				52.1255	-29.9975	19.2558	54.406	-29.0894	-7.33539				51.3715	-28.8458	11.4129		64.9974	-24.2003	-13.681	70.6566	-24.6865	-5.38424	70.5162	-21.7087	5.02444	68.2251	-26.6241	-9.05854	67.555	-29.9586	4.33668	68.1055	-28.9413	4.82291
52.1714	-28.1744	-16.5122				54.431	-30.0784	16.2283	55.1349	-16.355	-2.8034				45.2884	-26.5533	0.168045		62.3364	-21.4782	-9.08898	68.2008	-25.0488	0.381853	71.9918	-22.1306	-6.66692	68.2255	-24.1623	-1.35295	65.8423	-30.4652	7.58733	69.2964	-26.0999	6.99079
51.8104	-29.7977	-16.2611				55.3222	-25.2746	15.2681	53.6827	-23.3025	-9.1119				51.5773	-26.3558	12.807		64.9644	-22.03	-11.8354	71.5115	-20.9155	-4.46225	70.879	-26.9083	4.71298	67.6746	-27.3837	1.03574	66.7145	-28.5103	5.46719	69.9596	-24.1749	5.66947
49.3294	-30.4619	-11.8519				54.4584	-32.5063	11.7703	50.281	-32.6605	-7.75377				50.9942	-29.6416	5.5851		71.2969	-24.9685	-10.6231	74.8928	-24.0639	-5.41345	73.512	-21.0582	5.20317	70.0953	-28.2087	-6.72334	71.1571	-24.2864	5.21002	70.2474	-24.8325	7.00571
49.1974	-26.3705	-14.007				54.584	-28.5175	16.6509	53.9273	-17.5637	-2.46738				46.175	-28.2731	11.9325		68.7487	-24.8941	-14.8821	61.9953	-22.5033	4.50504	71.8221	-25.6748	4.10317	69.6241	-28.8762	-7.33836	68.2244	-32.0198	3.8856	67.205	-27.4102	-2.04705
48.3111	-27.7275	-11.0774				50.949	-32.4254	17.2734	48.5846	-30.461	-8.38989				44.8918	-30.3592	11.1711		61.3468	-21.9591	-8.21262	70.5963	-21.8514	-2.59445	67.6538	-22.3815	5.77621	68.3256	-21.7572	-6.29029	67.1453	-32.6444	6.3566	68.9706	-24.5525	7.32963
47.2141	-27.6128	-23.4197				50.3374	-24.7436	19.2426	54.0022	-26.4349	-10.9284				45.9159	-30.583	9.80834		68.9485	-24.0437	-18.4772	71.8337	-20.7667	-2.72169	72.0217	-25.9125	2.47282	68.5006	-24.0789	-5.47269	67.9411	-23.0068	2.43076	66.2579	-26.0416	11.9736
47.3162	-32.4336	-18.2608				49.4922	-23.9947	17.4536	55.4103	-22.6416	-0.13502				45.3392	-31.4452	9.0288		63.5677	-23.4617	-10.5916	71.8156	-25.1942	-3.15588	71.6866	-25.5821	2.39628	66.5435	-31.0526	-7.11809	70.306	-24.9351	5.34797	68.2676	-25.9585	7.4573
52.2349	-26.1647	-15.657				54.635	-28.8768	17.8778	51.9078	-37.5211	-0.424701				46.9001	-33.2861	10.1962		67.5973	-23.5466	-6.85403	71.254	-25.7679	-4.59832	71.1792	-22.2448	1.06801	67.1266	-26.2461	-7.1487	67.2586	-33.0315	2.80992	68.7031	-27.0575	7.10412
51.7693	-28.4328	-15.005				60.7355	-26.0869	-2.1608	51.9629	-29.8555	-12.6317				46.4111	-40.7489	14.0506		64.2067	-22.2484	-10.4314	71.7878	-24.3325	-5.14977	70.139	-27.4313	4.09255	65.2562	-27.0608	-8.16478	66.3392	-31.5328	6.15862	68.4525	-27.9851	8.39253
45.7401	-32.5155	-21.5186				62.5777	-24.665	-1.39192	46.5229	-14.657	-2.1737				46.2859	-34.756	13.7641		66.0953	-28.683	-11.9162	69.3547	-27.6187	-4.93402	72.1735	-22.1541	5.24492	70.9159	-26.0892	-7.91995	72.3242	-25.2917	0.918017	68.1926	-24.534	6.57044
55.1252	-25.3237	-3.07171				48.7491	-30.868	11.1405	54.4868	-25.2417	-4.93128				50.3606	-32.2292	14.3226		64.9411	-24.9367	-13.0462	73.398	-22.5761	-4.68384	71.8308	-20.7692	4.25935	62.9475	-24.9356	-3.08922	66.9158	-30.1179	8.86169	69.5991	-24.9365	7.01411
48.7839	-32.4457	-12.0292				50.4142	-34.2646	19.0983	51.5882	-36.0272	-12.188				44.9677	-31.8136	3.87435		70.0389	-26.0816	-13.7978	70.5811	-21.0697	-3.19189	73.1151	-25.8597	4.11001	69.6959	-22.6466	-0.186804	67.1467	-31.9916	1.50851	66.4546	-25.4001	8.03515
51.5603	-29.6304	-18.3624				52.8603	-29.3171	18.3744	52.2535	-31.614	-14.4991				51.4302	-28.0451	12.426		67.32	-25.7473	-13.7934	75.3686	-20.7465	0.114206	71.2648	-27.5459	5.56341	66.5493	-24.2004	-11.4373	64.4305	-32.9882	6.1609	65.6403	-21.5517	9.35015
51.3448	-27.3323	-18.0417				51.9396	-32.3951	20.7057	49.3686	-29.5222	-9.48178				54.0908	-31.0263	11.9797		69.5879	-21.4543	-15.7818	72.0155	-26.2105	-4.9099	69.6828	-24.953	4.74139	63.8507	-27.3192	-8.35449	66.4777	-31.4165	3.68138	68.2689	-24.8832	10.4087
51.6863	-27.6126	-18.8639				55.3373	-26.1133	16.2323	46.3182	-15.084	-2.15643				54.1437	-33.1366	14.6375		67.0682	-21.8063	-12.6372	70.4914	-26.7905	-5.17533	66.5541	-24.7706	8.55521	66.7242	-25.4651	0.958231	70.8128	-29.9859	1.12596	67.6425	-22.8724	7.23174
48.374	-31.7961	-13.1345				47.1724	-33.1254	12.3425	49.445	-37.5047	-2.02687				53.6664	-32.1649	13.9188		68.1505	-21.581	-16.9109	70.949	-27.558	-3.02233	70.2923	-24.2754	5.91828	69.4526	-28.4038	-9.1376	64.6	-33.9825	4.89281	69.5334	-27.0798	4.59438
56.5143	-25.2178	-13.6647				52.7863	-30.0979	17.5186	53.3236	-36.3178	-11.3944				52.9645	-29.6193	10.2633		69.1311	-22.1498	-12.4543	65.9478	-26.0144	-4.59699	71.877	-26.5855	3.63413	64.9575	-27.0646	-9.5013	68.7736	-29.2174	3.75242	67.5227	-27.2501	7.41976
48.5681	-33.1008	-19.6194				51.8335	-29.3559	20.9269	52.708	-35.7481	-11.4145				51.7834	-35.8898	16.3794		64.8081	-25.5602	-14.9689	68.2188	-22.8477	-2.33083	72.0787	-23.8376	6.02663	67.5623	-30.7543	-5.58782	64.1419	-31.6902	4.72166	69.1215	-24.6582	6.2562
51.1097	-27.4188	-12.9625				51.4706	-32.37	19.2216	50.2466	-35.3521	-8.84033				47.8935	-40.0722	15.3162		67.3042	-22.1195	-17.8909	72.1218	-22.4634	-7.56071	74.3852	-24.1422	3.74607	69.0481	-27.6223	-6.52258	66.0211	-29.8104	3.47874	66.2234	-25.2104	7.9493
49.2607	-29.0492	-10.4706				47.6717	-37.3121	16.6337	52.328	-23.84	-6.14177				44.0352	-31.3818	5.68914		67.9886	-23.3274	-15.5936	71.0533	-22.6856	-3.07014	72.3032	-23.4801	5.52393	66.2049	-32.9029	-11.3333	69.6033	-29.3302	3.70294	69.6906	-24.1974	6.47857
48.5023	-36.2512	-19.8601				49.6055	-30.6428	19.408	51.065	-36.4625	-5.7701				53.8082	-31.3017	12.6609		68.2626	-22.073	-12.6748	65.0424	-24.6069	-4.86522	72.5417	-22.8625	1.97963	65.103	-26.8144	-3.8502	67.8031	-31.5221	2.31432	68.0923	-22.2494	7.08009
47.4907	-32.8588	-14.8002				56.626	-26.7559	18.9136	53.377	-38.8791	-2.33002				53.9701	-32.183	10.8494		68.9895	-21.8998	-18.7748	69.8648	-22.6557	-3.88836	71.1624	-27.8017	4.942	64.3455	-26.1235	-11.084	67.7307	-27.0839	6.27349	70.5617	-25.7331	6.75226
49.2276	-30.2103	-11.4568				52.808	-28.9311	17.0435	51.5542	-31.2617	-14.2408				54.4483	-26.158	11.3472		59.5553	-22.5062	-13.0932	66.9422	-24.6289	-5.06129	69.137	-28.226	13.7508	69.9913	-28.1293	-8.61734	67.4137	-29.4197	5.94469	70.2247	-25.3995	13.2731
52.9051	-23.4317	-14.9905				52.4268	-28.7239	18.1982	49.179	-29.5614	-8.05179				54.2113	-32.4288	14.1003		68.8403	-22.0958	-11.3553	67.2854	-22.9088	-1.44842	66.9066	-25.5851	3.57929	65.6474	-25.0503	-7.5496	70.4635	-29.2647	4.12427	68.3681	-22.5416	7.40539
48.5784	-28.9815	-18.6824				52.2717	-31.6391	21.0415	53.5995	-23.5718	-4.04514				51.8319	-29.8447	9.46943		63.2248	-22.9024	-9.57957	65.8072	-20.9597	-3.31022	73.9012	-21.4978	5.32974	69.3842	-28.4513	-7.03929	68.2965	-33.0543	4.58119	62.5319	-29.6285	10.2337
49.9346	-32.1379	-20.8076				52.7441	-30.1504	18.218	50.4886	-33.7929	-6.236				47.6158	-40.6283	16.3704		67.2495	-26.0957	-14.2188	71.1547	-20.5452	-4.95744	71.2964	-27.0673	2.8068	69.9107	-25.4771	-7.04739	66.6388	-33.0395	1.48123	68.5888	-29.3551	7.48823
49.9161	-32.9589	-11.9542				51.9347	-26.1983	16.4519	52.5686	-29.8182	-12.5044				49.3082	-39.0116	15.6117		69.857	-22.4388	-16.4292	68.1563	-23.9203	-6.57138	66.9126	-22.049	5.20501	65.4431	-24.0416	-8.25307	65.6838	-32.9613	7.3676	66.7544	-21.5782	8.74926
48.0593	-32.7033	-14.3924				54.97	-28.0561	14.3375	53.4505	-28.7797	-13.3031				53.2672	-32.0599	12.7647		69.6048	-21.0149	-14.3154	67.9969	-20.3815	-2.89307	71.6353	-22.9697	8.37168	67.2716	-25.4678	-7.7917	67.5437	-29.3438	2.2412	69.7894	-27.2346	7.72178
53.5117	-28.8302	-19.4396				46.7137	-34.4927	16.1804	51.5203	-36.5093	-11.0485				50.5608	-29.7939	8.02067		68.8665	-22.2438	-15.5372	69.7819	-24.4177	-5.15893	67.7226	-25.8344	7.68999	68.3143	-23.6375	-13.2484	67.2939	-31.8285	4.73826	69.1535	-26.8446	-3.77629
49.2592	-32.4927	-20.3996				58.1823	-27.3313	21.2833	52.3838	-23.9504	-5.01456				52.5981	-23.6349	8.6058		61.6707	-20.3137	-12.8771	71.9649	-22.6701	-5.08021	63.877	-22.1651	6.27955	68.2227	-22.0441	-1.04277	68.312	-31.3723	2.76919	67.1156	-21.5567	8.02248
49.8836	-35.0473	-15.1304				53.3635	-34.6901	16.4226	53.1752	-32.6721	-8.72527				55.4953	-28.904	12.8233		66.6505	-23.2874	-16.7568	70.6681	-25.4427	-4.54362	69.6628	-25.1359	1.07142	67.7491	-30.7931	2.52621	68.9012	-31.4187	-3.51186	69.3239	-28.2469	5.05131
50.6123	-32.1538	-16.3676				54.2601	-28.2385	13.0683	52.3674	-32.929	-13.7139				50.2497	-24.5514	12.0446		69.4843	-24.8947	-14.3783	70.7129	-22.0961	-5.80777	66.3268	-22.7072	2.50075	68.0128	-29.1109	-0.611236	65.9105	-32.2998	3.75011	70.6189	-24.7739	4.79151
50.0508	-32.817	-13.427				52.8268	-28.1655	16.6423	52.2562	-38.1276	-2.90411				46.5687	-35.5355	17.915		74.046	-21.9169	-2.91831	72.8381	-20.9487	-2.20297	71.6585	-24.5078	3.39539	67.8029	-27.3832	-9.17164	68.4112	-32.0479	0.708007	69.0325	-23.4313	4.91307
52.767	-26.5105	-17.0383				51.8803	-27.4861	15.8694	51.704	-37.3433	-11.3366				48.4997	-42.6009	13.1993		68.826	-24.3884	-12.1499	71.9385	-24.46	-3.06476	65.8782	-21.4738	2.78382	69.2036	-27.4237	-1.06762	68.5729	-29.5051	3.19778	65.2914	-25.9065	12.0321
49.6092	-28.9929	-12.7822				55.6896	-24.586	16.4611	51.8858	-35.1681	-10.8532				49.6577	-39.1072	13.6769		67.0819	-21.3883	-18.625	69.9016	-27.6947	-5.1602	74.4336	-22.7003	2.83153	63.6483	-24.975	-7.30154	66.7618	-30.7648	-1.4407	64.4494	-31.3713	12.8062
50.22	-27.9252	-17.2788				54.0082	-31.2976	17.051	51.8559	-32.1163	-5.49299				48.9272	-33.1954	8.75726		68.9247	-24.9875	-14.3212	65.9057	-21.8814	-5.65439	74.7991	-22.97	1.44668	68.1293	-25.8592	-5.34865	64.7859	-31.8564	5.41891	69.6911	-27.4359	7.67008
49.0403	-33.2103	-19.5864				53.9897	-26.8556	15.8492	52.1213	-37.0719	-10.9994				53.8945	-25.6657	9.11714		63.8729	-27.1048	-11.9537	70.6566	-24.6865	-5.38424	72.572	-22.0352	3.62951	59.3136	-26.2926	1.43875	66.0527	-29.585	3.39705	67.7851	-28.2643	8.19473
49.158	-29.5348	-12.7696				51.0042	-30.4534	15.9522	51.7244	-31.3623	-15.167				50.238	-22.9006	12.814		65.7945	-25.5966	-12.123	68.2008	-25.0488	0.381853	72.7708	-21.2495	3.83955	63.3682	-25.9587	-13.698	66.0621	-32.6436	2.76266	67.0859	-30.4415	13.0193
50.4766	-28.3019	-16.9049				50.7078	-30.5301	10.9071	49.9034	-27.662	-12.933				51.2772	-35.8836	12.298		62.4713	-22.68	-9.85272	71.5115	-20.9155	-4.46225	70.5162	-21.7087	5.02444	68.4312	-26.6617	-7.3455	66.8319	-26.8995	7.48495	69.1239	-27.9933	6.56054
55.2976	-25.7926	-16.0568				54.5709	-24.5346	17.6446	57.7099	-29.2735	-11.3284				48.326	-34.2947	17.4685		70.8999	-24.0268	-14.1248	62.0671	-21.4003	-1.87564	71.9918	-22.1306	-6.66692	68.6141	-28.5428	-7.64584	67.4378	-23.3237	6.58872	69.7095	-26.069	7.20917
48.0916	-34.2644	-13.8372				45.3407	-34.9608	10.2281	54.0565	-28.0179	-9.96542				47.9701	-43.2921	13.1864		59.5698	-25.2147	-12.1326	74.8928	-24.0639	-5.41345	70.879	-26.9083	4.71298	68.7306	-30.4027	-2.31397	64.784	-31.7767	5.25487	65.0407	-24.839	5.83616
49.539	-30.3895	-12.5976				59.6697	-26.2418	-1.02501	51.506	-40.9222	-8.68871				52.2991	-34.3862	11.2366		68.5118	-24.5582	-11.3281	61.9953	-22.5033	4.50504	73.512	-21.0582	5.20317				65.1595	-31.92	4.77655	69.976	-23.8529	2.86188
48.9378	-32.3736	-15.2018				53.1816	-26.1186	14.4684	54.0195	-28.0953	-13.4907				52.0794	-31.234	12.6461		69.0623	-23.6715	-14.8324	70.5963	-21.8514	-2.59445	71.8221	-25.6748	4.10317				69.178	-25.4821	4.80892	68.9208	-27.3854	3.16608
50.883	-29.4469	-18.1168				52.9969	-29.942	16.8061	49.8383	-37.8024	-13.6795				52.0531	-33.0815	13.5222		67.3935	-21.8102	-15.8785	71.8337	-20.7667	-2.72169	67.6538	-22.3815	5.77621				67.1271	-31.0242	5.44644	66.9111	-24.3243	7.30902
48.711	-30.876	-21.6536				56.8743	-24.431	17.5759	54.1337	-19.4431	-4.29386				52.4874	-34.9352	13.8499		64.9974	-24.2003	-13.681	71.8156	-25.1942	-3.15588	72.0217	-25.9125	2.47282				66.0469	-28.4949	-1.41555	69.5381	-25.5061	4.31023
50.5949	-26.2853	-17.2699				46.6244	-34.6545	10.171	50.5006	-29.6583	-6.70651				51.5605	-36.7412	13.946		62.3364	-21.4782	-9.08898	73.2267	-21.354	-2.04927	71.6866	-25.5821	2.39628				68.3637	-26.9633	10.1669	66.2651	-25.6698	4.62136
52.557	-26.3794	-15.6126				52.7148	-31.2899	15.8599	48.5472	-35.5585	-10.8901				47.3906	-25.4953	12.2		64.9644	-22.03	-11.8354	71.254	-25.7679	-4.59832	71.1792	-22.2448	1.06801				66.7081	-28.9466	5.40735	68.6718	-23.8976	3.30567
48.081	-32.6848	-14.512				53.6732	-27.7238	17.1157	55.6869	-32.0666	-8.90852				52.8917	-29.4414	13.7568		71.2969	-24.9685	-10.6231	71.7878	-24.3325	-5.14977	70.139	-27.4313	4.09255				66.4452	-32.0677	4.27287	68.1055	-28.9413	4.82291
49.1383	-28.9006	-18.5149				52.7629	-31.5466	17.3603	47.6307	-33.3234	-9.50524				54.1408	-24.2295	9.87565		68.7487	-24.8941	-14.8821	69.3547	-27.6187	-4.93402	72.1735	-22.1541	5.24492				67.8965	-26.6804	2.32939	69.2964	-26.0999	6.99079
51.1393	-27.5282	-17.4809				50.647	-29.0892	20.1676	53.7229	-22.3877	-7.10462				52.0007	-34.1631	9.49947		61.3468	-21.9591	-8.21262	73.398	-22.5761	-4.68384	71.8308	-20.7692	4.25935				70.6935	-26.7798	-1.58128	69.9596	-24.1749	5.66947
48.3121	-33.0036	-10.7396				49.3533	-29.0842	19.9265	50.8068	-25.7112	-7.9894				53.1053	-30.1629	13.2862		68.9485	-24.0437	-18.4772	70.5811	-21.0697	-3.19189	73.1151	-25.8597	4.11001				67.3757	-32.0223	2.89584	70.2474	-24.8325	7.00571
51.9974	-25.5381	-14.8793				50.5101	-34.3981	16.3541	51.28	-30.8831	-13.3476				47.2685	-25.9884	11.9538		63.5677	-23.4617	-10.5916	75.3686	-20.7465	0.114206	71.2648	-27.5459	5.56341				67.2785	-29.6412	7.17561	67.205	-27.4102	-2.04705
48.6859	-34.8538	-19.8697				52.1255	-29.9975	19.2558	49.9187	-40.5176	-1.46125				51.2541	-31.2706	7.11917		67.5973	-23.5466	-6.85403	72.0155	-26.2105	-4.9099	69.6828	-24.953	4.74139				68.5658	-26.3729	5.22837	68.9706	-24.5525	7.32963
50.8171	-26.518	-17.6911				54.431	-30.0784	16.2283	52.4759	-27.6052	-7.94584				52.107	-24.4076	9.91709		64.2067	-22.2484	-10.4314	70.4914	-26.7905	-5.17533	66.5541	-24.7706	8.55521				71.1039	-25.3408	-0.16935	66.2579	-26.0416	11.9736
52.0679	-27.4518	-18.0964				55.3222	-25.2746	15.2681	47.7748	-33.5474	-7.95226				53.9327	-27.6687	10.658		66.0953	-28.683	-11.9162	70.949	-27.558	-3.02233	70.2923	-24.2754	5.91828				65.7458	-29.1135	5.9392	68.2676	-25.9585	7.4573
50.9745	-28.6456	-18.6928				53.4297	-30.0203	18.3965	48.3863	-37.312	-15.3704				52.9243	-32.1911	14.0482		64.9411	-24.9367	-13.0462	65.9478	-26.0144	-4.59699	71.877	-26.5855	3.63413				66.76	-29.3472	0.750167	68.7031	-27.0575	7.10412
48.3201	-31.8225	-19.2924				54.4584	-32.5063	11.7703	48.2118	-32.7466	-9.79712				46.207	-26.9774	12.2976		70.0389	-26.0816	-13.7978	68.2188	-22.8477	-2.33083	72.0787	-23.8376	6.02663				67.555	-29.9586	4.33668	68.4525	-27.9851	8.39253
48.914	-33.5757	-12.7966				54.584	-28.5175	16.6509	53.9881	-23.3983	-4.58591				53.4648	-26.761	15.5932		67.32	-25.7473	-13.7934	72.1218	-22.4634	-7.56071	74.3852	-24.1422	3.74607				65.8423	-30.4652	7.58733	68.1926	-24.534	6.57044
51.3647	-26.677	-18.8459				50.949	-32.4254	17.2734	49.6689	-28.4139	-7.90483				52.7169	-31.0826	12.0887		69.5879	-21.4543	-15.7818	71.0533	-22.6856	-3.07014	72.3032	-23.4801	5.52393				66.7145	-28.5103	5.46719	69.5991	-24.9365	7.01411
48.0247	-31.9469	-11.1319				50.3374	-24.7436	19.2426	51.8642	-39.5145	-12.193				53.2287	-29.3486	13.0806		67.0682	-21.8063	-12.6372	65.0424	-24.6069	-4.86522	72.5417	-22.8625	1.97963				71.1571	-24.2864	5.21002	66.4546	-25.4001	8.03515
49.5324	-29.1618	-18.8372				50.3634	-27.7141	18.1444	53.5777	-29.5373	-12.9329				52.0313	-31.2719	7.56913		68.1505	-21.581	-16.9109	69.8648	-22.6557	-3.88836	71.1624	-27.8017	4.942				68.7705	-29.0902	-1.32635	65.6403	-21.5517	9.35015
54.6295	-27.4033	-14.197				49.4922	-23.9947	17.4536	44.6234	-18.4874	0.518517				49.0117	-37.564	12.9254		69.1311	-22.1498	-12.4543	66.9422	-24.6289	-5.06129	69.137	-28.226	13.7508				68.2244	-32.0198	3.8856	68.2689	-24.8832	10.4087
49.5458	-27.2748	-18.4357				54.635	-28.8768	17.8778	53.7006	-30.0689	-11.2634				54.852	-32.1963	13.5687		64.8081	-25.5602	-14.9689	67.2854	-22.9088	-1.44842	66.9066	-25.5851	3.57929				67.1453	-32.6444	6.3566	67.6425	-22.8724	7.23174
49.9649	-27.8763	-19.268				60.7355	-26.0869	-2.1608	48.3766	-32.8134	-11.735				50.2667	-32.5037	6.26479		67.3042	-22.1195	-17.8909	66.4848	-22.4543	-2.79435	73.9012	-21.4978	5.32974				67.9411	-23.0068	2.43076	66.3919	-29.4881	7.19963
50.1171	-34.3486	-16.4954				62.5777	-24.665	-1.39192	51.3532	-31.6921	-11.7247				53.0293	-31.7153	12.3021		67.9886	-23.3274	-15.5936	65.8072	-20.9597	-3.31022	71.2964	-27.0673	2.8068				70.306	-24.9351	5.34797	69.5334	-27.0798	4.59438
48.5607	-29.2289	-15.2738				56.0806	-24.1441	18.8624	53.1996	-24.5203	-6.18537				52.7687	-34.5146	12.2474		68.2626	-22.073	-12.6748	71.1547	-20.5452	-4.95744	66.9126	-22.049	5.20501				67.4711	-31.1825	1.56708	67.5227	-27.2501	7.41976
52.8147	-27.6455	-17.7063				48.7491	-30.868	11.1405	52.0584	-24.7127	-8.0921				50.2057	-33.7219	10.7028		68.9895	-21.8998	-18.7748	68.1563	-23.9203	-6.57138	71.6353	-22.9697	8.37168				67.2586	-33.0315	2.80992	69.1215	-24.6582	6.2562
58.9064	-21.3163	-4.39237				50.4142	-34.2646	19.0983	54.406	-29.0894	-7.33539				51.3813	-29.7714	5.70736		59.5553	-22.5062	-13.0932	67.9969	-20.3815	-2.89307	67.7226	-25.8344	7.68999				66.3392	-31.5328	6.15862	66.2234	-25.2104	7.9493
52.8265	-26.2504	-17.7119				52.8603	-29.3171	18.3744	55.1349	-16.355	-2.8034				49.7608	-27.8633	9.55297		68.8403	-22.0958	-11.3553	69.7819	-24.4177	-5.15893	63.877	-22.1651	6.27955				72.3242	-25.2917	0.918017	69.6906	-24.1974	6.47857
51.4189	-28.8224	-15.8776				51.9396	-32.3951	20.7057	53.6827	-23.3025	-9.1119				53.2872	-30.9913	13.0275		63.2248	-22.9024	-9.57957	71.9649	-22.6701	-5.08021	69.6628	-25.1359	1.07142				66.9158	-30.1179	8.86169	68.0923	-22.2494	7.08009
52.1714	-28.1744	-16.5122				56.4573	-28.2183	18.4335	50.281	-32.6605	-7.75377				51.8885	-30.1735	7.50826		67.2495	-26.0957	-14.2188	70.6681	-25.4427	-4.54362	66.3268	-22.7072	2.50075				68.1587	-24.7024	0.850108	68.5666	-26.3212	3.06921
51.8104	-29.7977	-16.2611				55.3373	-26.1133	16.2323	53.9273	-17.5637	-2.46738				50.4597	-32.6904	10.5941		69.857	-22.4388	-16.4292	70.7129	-22.0961	-5.80777	71.6585	-24.5078	3.39539				67.1467	-31.9916	1.50851	70.5617	-25.7331	6.75226
49.3294	-30.4619	-11.8519				47.1724	-33.1254	12.3425	48.5846	-30.461	-8.38989				54.5929	-32.1904	12.1133		69.6048	-21.0149	-14.3154	71.0295	-21.7551	-2.3738	65.8782	-21.4738	2.78382				64.4305	-32.9882	6.1609	70.2247	-25.3995	13.2731
50.2427	-26.5533	-11.5119				52.7863	-30.0979	17.5186	54.0022	-26.4349	-10.9284				51.7228	-32.9433	11.5909		68.8665	-22.2438	-15.5372	72.8381	-20.9487	-2.20297	74.4336	-22.7003	2.83153				66.4777	-31.4165	3.68138	68.3681	-22.5416	7.40539
49.1974	-26.3705	-14.007				51.8335	-29.3559	20.9269	55.4103	-22.6416	-0.13502				52.3374	-28.8199	12.3496		61.6707	-20.3137	-12.8771	71.9385	-24.46	-3.06476	74.7991	-22.97	1.44668				70.8128	-29.9859	1.12596	69.1974	-28.1017	9.32237
48.3111	-27.7275	-11.0774				53.073	-27.9677	17.9034	51.9078	-37.5211	-0.424701				50.3814	-31.1539	7.69484		66.6505	-23.2874	-16.7568	69.9016	-27.6947	-5.1602	72.572	-22.0352	3.62951				69.0363	-31.2214	2.40694	62.5319	-29.6285	10.2337
47.2141	-27.6128	-23.4197				51.4706	-32.37	19.2216	51.9629	-29.8555	-12.6317				51.3715	-28.8458	11.4129		69.4843	-24.8947	-14.3783	65.9057	-21.8814	-5.65439	72.7708	-21.2495	3.83955				64.6	-33.9825	4.89281	68.5888	-29.3551	7.48823
47.3162	-32.4336	-18.2608				47.6717	-37.3121	16.6337	46.5229	-14.657	-2.1737				45.2884	-26.5533	0.168045		74.046	-21.9169	-2.91831	70.6566	-24.6865	-5.38424	70.5162	-21.7087	5.02444				68.7736	-29.2174	3.75242	66.7544	-21.5782	8.74926
52.2349	-26.1647	-15.657				49.6055	-30.6428	19.408	54.4868	-25.2417	-4.93128				51.5773	-26.3558	12.807		68.826	-24.3884	-12.1499	68.2008	-25.0488	0.381853	71.9918	-22.1306	-6.66692				64.1419	-31.6902	4.72166	68.4288	-28.6759	4.99366
51.4232	-28.2277	-14.9189				56.626	-26.7559	18.9136	51.5882	-36.0272	-12.188				50.9942	-29.6416	5.5851		67.0819	-21.3883	-18.625	71.5115	-20.9155	-4.46225	70.879	-26.9083	4.71298				66.0211	-29.8104	3.47874	69.7894	-27.2346	7.72178
51.7693	-28.4328	-15.005				51.5139	-26.2252	8.12519	52.2535	-31.614	-14.4991				46.175	-28.2731	11.9325		68.9247	-24.9875	-14.3212	62.0671	-21.4003	-1.87564	73.512	-21.0582	5.20317				69.6033	-29.3302	3.70294	69.1535	-26.8446	-3.77629
45.7401	-32.5155	-21.5186				52.808	-28.9311	17.0435	49.3686	-29.5222	-9.48178				44.8918	-30.3592	11.1711		63.8729	-27.1048	-11.9537	74.002	-26.1922	-4.40061	71.8221	-25.6748	4.10317				71.2726	-26.0197	0.0376982	67.1156	-21.5567	8.02248
55.1252	-25.3237	-3.07171				52.4268	-28.7239	18.1982	46.3182	-15.084	-2.15643				45.9159	-30.583	9.80834		65.7945	-25.5966	-12.123	74.8928	-24.0639	-5.41345	67.6538	-22.3815	5.77621				67.8031	-31.5221	2.31432	68.3688	-25.9556	11.399
48.7839	-32.4457	-12.0292				52.2717	-31.6391	21.0415	49.445	-37.5047	-2.02687				45.3392	-31.4452	9.0288		62.4713	-22.68	-9.85272	61.9953	-22.5033	4.50504	72.0217	-25.9125	2.47282				67.7307	-27.0839	6.27349	69.3239	-28.2469	5.05131
51.5603	-29.6304	-18.3624				52.7441	-30.1504	18.218	53.3236	-36.3178	-11.3944				46.9001	-33.2861	10.1962		70.8999	-24.0268	-14.1248	70.5963	-21.8514	-2.59445	71.6866	-25.5821	2.39628				67.4137	-29.4197	5.94469	70.6189	-24.7739	4.79151
48.9732	-30.7555	-19.4271				51.9347	-26.1983	16.4519	52.708	-35.7481	-11.4145				46.4111	-40.7489	14.0506		59.5698	-25.2147	-12.1326	71.8337	-20.7667	-2.72169	71.1792	-22.2448	1.06801				70.4635	-29.2647	4.12427	69.0325	-23.4313	4.91307
51.3448	-27.3323	-18.0417				54.97	-28.0561	14.3375	50.2466	-35.3521	-8.84033				46.2859	-34.756	13.7641		68.5118	-24.5582	-11.3281	71.8156	-25.1942	-3.15588	70.139	-27.4313	4.09255				68.2965	-33.0543	4.58119	65.2914	-25.9065	12.0321
51.6863	-27.6126	-18.8639				46.7137	-34.4927	16.1804	52.328	-23.84	-6.14177				50.3606	-32.2292	14.3226		69.0623	-23.6715	-14.8324	73.2267	-21.354	-2.04927	72.1735	-22.1541	5.24492				68.4999	-31.1608	3.77772	64.4494	-31.3713	12.8062
48.374	-31.7961	-13.1345				58.1823	-27.3313	21.2833	51.065	-36.4625	-5.7701				44.9677	-31.8136	3.87435		67.3935	-21.8102	-15.8785	70.9655	-25.557	-4.90876	71.8308	-20.7692	4.25935				66.6388	-33.0395	1.48123	69.6911	-27.4359	7.67008
56.5143	-25.2178	-13.6647				53.3635	-34.6901	16.4226	53.377	-38.8791	-2.33002				51.4302	-28.0451	12.426		64.9974	-24.2003	-13.681	71.254	-25.7679	-4.59832	73.1151	-25.8597	4.11001				65.6838	-32.9613	7.3676	67.7851	-28.2643	8.19473
48.5681	-33.1008	-19.6194				54.2601	-28.2385	13.0683	51.5542	-31.2617	-14.2408				54.0908	-31.0263	11.9797		62.3364	-21.4782	-9.08898	71.7878	-24.3325	-5.14977	71.2648	-27.5459	5.56341				67.5437	-29.3438	2.2412	67.0859	-30.4415	13.0193
51.2069	-26.1189	-18.3459				52.8268	-28.1655	16.6423	49.179	-29.5614	-8.05179				54.1437	-33.1366	14.6375		64.9644	-22.03	-11.8354	69.3547	-27.6187	-4.93402	69.6828	-24.953	4.74139				67.2939	-31.8285	4.73826	69.1239	-27.9933	6.56054
51.1097	-27.4188	-12.9625				51.8803	-27.4861	15.8694	53.5995	-23.5718	-4.04514				53.6664	-32.1649	13.9188		71.2969	-24.9685	-10.6231	73.398	-22.5761	-4.68384	66.5541	-24.7706	8.55521				68.312	-31.3723	2.76919	69.7095	-26.069	7.20917
49.2607	-29.0492	-10.4706				55.6896	-24.586	16.4611	50.4886	-33.7929	-6.236				52.9645	-29.6193	10.2633		68.7487	-24.8941	-14.8821	70.5811	-21.0697	-3.19189	70.2923	-24.2754	5.91828				67.1968	-30.3662	2.74713	65.0407	-24.839	5.83616
48.5023	-36.2512	-19.8601				54.0082	-31.2976	17.051	52.5686	-29.8182	-12.5044				55.7379	-30.1327	10.4416		61.3468	-21.9591	-8.21262	75.3686	-20.7465	0.114206	71.877	-26.5855	3.63413				68.9012	-31.4187	-3.51186	69.976	-23.8529	2.86188
47.4907	-32.8588	-14.8002				53.9897	-26.8556	15.8492	53.4505	-28.7797	-13.3031				51.7834	-35.8898	16.3794		68.9485	-24.0437	-18.4772	72.0155	-26.2105	-4.9099	72.0787	-23.8376	6.02663				65.9105	-32.2998	3.75011	68.9208	-27.3854	3.16608
49.2276	-30.2103	-11.4568				51.0042	-30.4534	15.9522	51.5203	-36.5093	-11.0485				47.8935	-40.0722	15.3162		63.5677	-23.4617	-10.5916	70.4914	-26.7905	-5.17533	74.3852	-24.1422	3.74607				68.4112	-32.0479	0.708007	66.9111	-24.3243	7.30902
47.7339	-29.8174	-20.0343				50.7078	-30.5301	10.9071	52.3838	-23.9504	-5.01456				44.0352	-31.3818	5.68914		67.5973	-23.5466	-6.85403	70.949	-27.558	-3.02233	72.3032	-23.4801	5.52393				68.5729	-29.5051	3.19778	69.5381	-25.5061	4.31023
52.9051	-23.4317	-14.9905				54.5709	-24.5346	17.6446	53.1752	-32.6721	-8.72527				53.8082	-31.3017	12.6609		64.2067	-22.2484	-10.4314	65.9478	-26.0144	-4.59699	72.5417	-22.8625	1.97963				66.4273	-32.9854	7.66031	66.2651	-25.6698	4.62136
48.5784	-28.9815	-18.6824				45.3407	-34.9608	10.2281	52.3674	-32.929	-13.7139				53.9701	-32.183	10.8494		66.0953	-28.683	-11.9162	68.2188	-22.8477	-2.33083	71.1624	-27.8017	4.942				66.7618	-30.7648	-1.4407	68.6718	-23.8976	3.30567
49.9346	-32.1379	-20.8076				59.6697	-26.2418	-1.02501	52.2562	-38.1276	-2.90411				54.4483	-26.158	11.3472		64.9411	-24.9367	-13.0462	72.1218	-22.4634	-7.56071	69.137	-28.226	13.7508				64.7859	-31.8564	5.41891	66.5301	-25.2666	-2.03873
49.9161	-32.9589	-11.9542				53.1816	-26.1186	14.4684	51.704	-37.3433	-11.3366				54.2113	-32.4288	14.1003		70.0389	-26.0816	-13.7978	71.0533	-22.6856	-3.07014	66.9066	-25.5851	3.57929				66.0527	-29.585	3.39705	68.1055	-28.9413	4.82291
48.0593	-32.7033	-14.3924				52.9969	-29.942	16.8061	51.8858	-35.1681	-10.8532				51.8319	-29.8447	9.46943		67.32	-25.7473	-13.7934	65.0424	-24.6069	-4.86522	73.9012	-21.4978	5.32974				66.2896	-26.769	3.76445	69.2964	-26.0999	6.99079
52.0566	-27.0038	-18.2826				56.8743	-24.431	17.5759	51.8559	-32.1163	-5.49299				51.4843	-30.0615	7.63927		69.5879	-21.4543	-15.7818	69.8648	-22.6557	-3.88836							66.0621	-32.6436	2.76266	69.9596	-24.1749	5.66947
53.5117	-28.8302	-19.4396				46.6244	-34.6545	10.171	52.1213	-37.0719	-10.9994				47.6158	-40.6283	16.3704		67.0682	-21.8063	-12.6372	66.9422	-24.6289	-5.06129							66.8319	-26.8995	7.48495	70.2474	-24.8325	7.00571
49.2592	-32.4927	-20.3996				52.7148	-31.2899	15.8599	51.7244	-31.3623	-15.167				49.3082	-39.0116	15.6117		68.1505	-21.581	-16.9109	67.2854	-22.9088	-1.44842							67.4378	-23.3237	6.58872	67.205	-27.4102	-2.04705
49.8836	-35.0473	-15.1304				53.6732	-27.7238	17.1157	49.9034	-27.662	-12.933				53.2672	-32.0599	12.7647		69.1311	-22.1498	-12.4543	66.4848	-22.4543	-2.79435							64.784	-31.7767	5.25487	68.9706	-24.5525	7.32963
50.6123	-32.1538	-16.3676				52.7629	-31.5466	17.3603	57.7099	-29.2735	-11.3284				50.5608	-29.7939	8.02067		64.8081	-25.5602	-14.9689	66.3798	-24.3127	-3.83896							65.1595	-31.92	4.77655	66.2579	-26.0416	11.9736
50.0508	-32.817	-13.427				50.647	-29.0892	20.1676	54.0565	-28.0179	-9.96542				52.5981	-23.6349	8.6058		67.3042	-22.1195	-17.8909	65.8072	-20.9597	-3.31022							69.178	-25.4821	4.80892	68.2676	-25.9585	7.4573
49.2347	-27.6988	-11.7422				49.3533	-29.0842	19.9265	51.506	-40.9222	-8.68871				55.4953	-28.904	12.8233		67.9886	-23.3274	-15.5936	71.1547	-20.5452	-4.95744							67.1271	-31.0242	5.44644	67.4825	-26.9054	7.4771
52.767	-26.5105	-17.0383				50.5101	-34.3981	16.3541	54.0195	-28.0953	-13.4907				50.2497	-24.5514	12.0446		68.2626	-22.073	-12.6748	68.1563	-23.9203	-6.57138							66.0469	-28.4949	-1.41555	68.7031	-27.0575	7.10412
49.6092	-28.9929	-12.7822				52.1255	-29.9975	19.2558	49.8383	-37.8024	-13.6795				55.8046	-29.2329	8.85038		68.9895	-21.8998	-18.7748	67.9969	-20.3815	-2.89307							68.3637	-26.9633	10.1669	68.4525	-27.9851	8.39253
50.22	-27.9252	-17.2788				54.431	-30.0784	16.2283	54.1337	-19.4431	-4.29386				46.5687	-35.5355	17.915		59.5553	-22.5062	-13.0932	69.7819	-24.4177	-5.15893							66.7081	-28.9466	5.40735	68.1926	-24.534	6.57044
49.0403	-33.2103	-19.5864				55.3222	-25.2746	15.2681	50.5006	-29.6583	-6.70651				48.4997	-42.6009	13.1993		68.8403	-22.0958	-11.3553	71.9649	-22.6701	-5.08021							66.4452	-32.0677	4.27287	69.5991	-24.9365	7.01411
49.158	-29.5348	-12.7696				53.4297	-30.0203	18.3965	48.5472	-35.5585	-10.8901				49.6577	-39.1072	13.6769		63.2248	-22.9024	-9.57957	70.6681	-25.4427	-4.54362							67.8965	-26.6804	2.32939	66.4546	-25.4001	8.03515
51.335	-29.271	-17.6015				54.4584	-32.5063	11.7703	55.6869	-32.0666	-8.90852				48.9272	-33.1954	8.75726		67.2495	-26.0957	-14.2188	70.7129	-22.0961	-5.80777							70.6935	-26.7798	-1.58128	65.6403	-21.5517	9.35015
50.4766	-28.3019	-16.9049				54.584	-28.5175	16.6509	47.6307	-33.3234	-9.50524				53.8945	-25.6657	9.11714		69.857	-22.4388	-16.4292	71.0295	-21.7551	-2.3738							67.9141	-28.5225	1.73363	68.2689	-24.8832	10.4087
55.2976	-25.7926	-16.0568				50.949	-32.4254	17.2734	53.7229	-22.3877	-7.10462				50.238	-22.9006	12.814		69.6048	-21.0149	-14.3154	72.0697	-23.8156	-4.9121							67.3757	-32.0223	2.89584	67.6425	-22.8724	7.23174
48.0916	-34.2644	-13.8372				50.3374	-24.7436	19.2426	50.8068	-25.7112	-7.9894				51.2772	-35.8836	12.298		68.8665	-22.2438	-15.5372	72.8381	-20.9487	-2.20297							67.2785	-29.6412	7.17561	66.3919	-29.4881	7.19963
49.539	-30.3895	-12.5976				50.3634	-27.7141	18.1444	51.28	-30.8831	-13.3476				55.5457	-28.5506	8.60162		61.6707	-20.3137	-12.8771	71.9385	-24.46	-3.06476							68.5658	-26.3729	5.22837	67.1513	-29.1857	4.9661
48.9378	-32.3736	-15.2018				49.4922	-23.9947	17.4536	49.9187	-40.5176	-1.46125				48.326	-34.2947	17.4685		66.6505	-23.2874	-16.7568	69.9016	-27.6947	-5.1602							71.1039	-25.3408	-0.16935	69.5334	-27.0798	4.59438
55.0315	-27.9306	-16.3193				54.635	-28.8768	17.8778	52.4759	-27.6052	-7.94584				47.9701	-43.2921	13.1864		69.4843	-24.8947	-14.3783	65.9057	-21.8814	-5.65439							65.7458	-29.1135	5.9392	67.5227	-27.2501	7.41976
50.883	-29.4469	-18.1168				60.7355	-26.0869	-2.1608	47.7748	-33.5474	-7.95226				52.2991	-34.3862	11.2366		74.046	-21.9169	-2.91831	70.6566	-24.6865	-5.38424							66.76	-29.3472	0.750167	69.1215	-24.6582	6.2562
48.711	-30.876	-21.6536				62.5777	-24.665	-1.39192	48.3863	-37.312	-15.3704				52.0794	-31.234	12.6461		68.826	-24.3884	-12.1499	68.2008	-25.0488	0.381853							67.3983	-24.9738	2.19924	66.2234	-25.2104	7.9493
50.5949	-26.2853	-17.2699				56.0806	-24.1441	18.8624	48.2118	-32.7466	-9.79712				52.0531	-33.0815	13.5222		67.0819	-21.3883	-18.625	71.5115	-20.9155	-4.46225							67.555	-29.9586	4.33668	69.6906	-24.1974	6.47857
52.557	-26.3794	-15.6126				48.7491	-30.868	11.1405	53.9881	-23.3983	-4.58591				52.4874	-34.9352	13.8499		68.9247	-24.9875	-14.3212	62.0671	-21.4003	-1.87564							65.8423	-30.4652	7.58733	68.0923	-22.2494	7.08009
48.081	-32.6848	-14.512				50.4142	-34.2646	19.0983	49.6689	-28.4139	-7.90483				54.6535	-31.4536	7.67036		63.8729	-27.1048	-11.9537	74.002	-26.1922	-4.40061							66.7145	-28.5103	5.46719	68.5666	-26.3212	3.06921
50.4604	-30.5974	-18.5508				52.8603	-29.3171	18.3744	51.8642	-39.5145	-12.193				51.5605	-36.7412	13.946		65.7945	-25.5966	-12.123	71.6941	-24.1595	-5.25924							71.1571	-24.2864	5.21002	68.1822	-26.0664	6.02041
49.1383	-28.9006	-18.5149				51.9396	-32.3951	20.7057	53.5777	-29.5373	-12.9329				47.3906	-25.4953	12.2		62.4713	-22.68	-9.85272	74.8928	-24.0639	-5.41345							68.7705	-29.0902	-1.32635	70.5617	-25.7331	6.75226
51.1393	-27.5282	-17.4809				56.4573	-28.2183	18.4335	44.6234	-18.4874	0.518517				52.8917	-29.4414	13.7568		70.8999	-24.0268	-14.1248	61.9953	-22.5033	4.50504							70.7104	-23.6997	1.27905	70.2247	-25.3995	13.2731
48.3121	-33.0036	-10.7396				55.3373	-26.1133	16.2323	53.7006	-30.0689	-11.2634				54.1408	-24.2295	9.87565		59.5698	-25.2147	-12.1326	70.5963	-21.8514	-2.59445							68.2244	-32.0198	3.8856	68.3681	-22.5416	7.40539
51.9974	-25.5381	-14.8793				47.1724	-33.1254	12.3425	48.3766	-32.8134	-11.735				52.0007	-34.1631	9.49947		68.5118	-24.5582	-11.3281	71.8337	-20.7667	-2.72169							67.1453	-32.6444	6.3566	69.1974	-28.1017	9.32237
48.6859	-34.8538	-19.8697				52.7863	-30.0979	17.5186	51.3532	-31.6921	-11.7247				53.1053	-30.1629	13.2862		69.0623	-23.6715	-14.8324	71.8156	-25.1942	-3.15588							67.9411	-23.0068	2.43076	67.8556	-24.4425	6.0996
48.3336	-32.6346	-14.1869				51.8335	-29.3559	20.9269	53.1996	-24.5203	-6.18537				51.1417	-37.2259	12.1611		67.3935	-21.8102	-15.8785	73.2267	-21.354	-2.04927							70.306	-24.9351	5.34797	62.5319	-29.6285	10.2337
50.8171	-26.518	-17.6911				53.073	-27.9677	17.9034	52.0584	-24.7127	-8.0921				47.2685	-25.9884	11.9538		64.9974	-24.2003	-13.681	70.9655	-25.557	-4.90876							67.4711	-31.1825	1.56708	68.5888	-29.3551	7.48823
52.0679	-27.4518	-18.0964				51.4706	-32.37	19.2216	54.406	-29.0894	-7.33539				51.2541	-31.2706	7.11917		62.3364	-21.4782	-9.08898	72.2981	-21.4196	-6.95355							66.8684	-28.2788	3.89487	66.7544	-21.5782	8.74926
50.9745	-28.6456	-18.6928				47.6717	-37.3121	16.6337	55.1349	-16.355	-2.8034				52.107	-24.4076	9.91709		64.9644	-22.03	-11.8354	71.254	-25.7679	-4.59832							67.2586	-33.0315	2.80992	68.4288	-28.6759	4.99366
48.3201	-31.8225	-19.2924				49.6055	-30.6428	19.408	53.6827	-23.3025	-9.1119				53.9327	-27.6687	10.658		71.2969	-24.9685	-10.6231	71.7878	-24.3325	-5.14977							66.3392	-31.5328	6.15862	68.1611	-26.9157	6.60307
48.914	-33.5757	-12.7966				56.626	-26.7559	18.9136	50.281	-32.6605	-7.75377				52.9243	-32.1911	14.0482		68.7487	-24.8941	-14.8821	69.3547	-27.6187	-4.93402							72.3242	-25.2917	0.918017	69.7894	-27.2346	7.72178
50.4496	-30.0804	-12.4897				51.5139	-26.2252	8.12519	53.9273	-17.5637	-2.46738				51.6465	-37.8997	8.72867		61.3468	-21.9591	-8.21262	73.398	-22.5761	-4.68384							66.9158	-30.1179	8.86169	69.1535	-26.8446	-3.77629
51.3647	-26.677	-18.8459				52.808	-28.9311	17.0435	48.5846	-30.461	-8.38989				46.207	-26.9774	12.2976		68.9485	-24.0437	-18.4772	70.5811	-21.0697	-3.19189							68.1587	-24.7024	0.850108	67.1156	-21.5567	8.02248
48.0247	-31.9469	-11.1319				52.4268	-28.7239	18.1982	54.0022	-26.4349	-10.9284				53.4648	-26.761	15.5932		63.5677	-23.4617	-10.5916	72.16	-25.0264	-8.09695							68.5216	-25.9894	5.14782	68.3688	-25.9556	11.399
49.5324	-29.1618	-18.8372				52.2717	-31.6391	21.0415	55.4103	-22.6416	-0.13502				52.7169	-31.0826	12.0887		67.5973	-23.5466	-6.85403	75.3686	-20.7465	0.114206							67.1467	-31.9916	1.50851	68.0731	-24.0881	5.83805
54.6295	-27.4033	-14.197				52.7441	-30.1504	18.218	51.9078	-37.5211	-0.424701				53.2287	-29.3486	13.0806		64.2067	-22.2484	-10.4314	72.0155	-26.2105	-4.9099							64.4305	-32.9882	6.1609	69.3239	-28.2469	5.05131
48.3512	-32.3816	-14.2608				51.9347	-26.1983	16.4519	51.9629	-29.8555	-12.6317				52.0313	-31.2719	7.56913		66.0953	-28.683	-11.9162	70.4914	-26.7905	-5.17533							66.4777	-31.4165	3.68138	70.6189	-24.7739	4.79151
49.5458	-27.2748	-18.4357				54.97	-28.0561	14.3375	46.5229	-14.657	-2.1737				53.5406	-35.4277	7.38215		64.9411	-24.9367	-13.0462	75.6586	-22.6515	-5.26295							70.8128	-29.9859	1.12596	69.0325	-23.4313	4.91307
49.9649	-27.8763	-19.268				46.7137	-34.4927	16.1804	54.4868	-25.2417	-4.93128				49.0117	-37.564	12.9254		70.0389	-26.0816	-13.7978	70.949	-27.558	-3.02233							69.0363	-31.2214	2.40694	69.0545	-23.4521	5.06818
50.1171	-34.3486	-16.4954				58.1823	-27.3313	21.2833	51.5882	-36.0272	-12.188				54.852	-32.1963	13.5687		67.32	-25.7473	-13.7934	72.737	-26.3519	-3.48921							68.9509	-30.7487	-0.736645	65.2914	-25.9065	12.0321
48.5607	-29.2289	-15.2738				53.3635	-34.6901	16.4226	52.2535	-31.614	-14.4991				50.2667	-32.5037	6.26479		69.5879	-21.4543	-15.7818	68.1082	-21.9848	-12.3437							64.6	-33.9825	4.89281	64.4494	-31.3713	12.8062
52.8147	-27.6455	-17.7063				54.2601	-28.2385	13.0683	49.3686	-29.5222	-9.48178				53.0293	-31.7153	12.3021		67.0682	-21.8063	-12.6372	65.9478	-26.0144	-4.59699							68.7736	-29.2174	3.75242	69.6911	-27.4359	7.67008
58.9064	-21.3163	-4.39237				52.8268	-28.1655	16.6423	46.3182	-15.084	-2.15643				52.7687	-34.5146	12.2474		68.1505	-21.581	-16.9109	68.2188	-22.8477	-2.33083							64.1419	-31.6902	4.72166	67.8463	-26.1228	8.86116
52.8265	-26.2504	-17.7119				51.8803	-27.4861	15.8694	49.445	-37.5047	-2.02687				54.5739	-31.1552	11.7427		69.1311	-22.1498	-12.4543	72.1218	-22.4634	-7.56071							66.0211	-29.8104	3.47874	67.7851	-28.2643	8.19473
51.4189	-28.8224	-15.8776				55.6896	-24.586	16.4611	53.3236	-36.3178	-11.3944				50.2057	-33.7219	10.7028		64.8081	-25.5602	-14.9689	71.0533	-22.6856	-3.07014							69.6033	-29.3302	3.70294	67.0859	-30.4415	13.0193
52.1714	-28.1744	-16.5122				54.0082	-31.2976	17.051	52.708	-35.7481	-11.4145				51.3813	-29.7714	5.70736		67.3042	-22.1195	-17.8909	65.0424	-24.6069	-4.86522							71.2726	-26.0197	0.0376982	69.1239	-27.9933	6.56054
51.8104	-29.7977	-16.2611				54.4913	-28.1007	16.2896	50.2466	-35.3521	-8.84033				49.7608	-27.8633	9.55297		67.9886	-23.3274	-15.5936	69.8648	-22.6557	-3.88836							68.0444	-24.5355	2.74802	69.7095	-26.069	7.20917
49.3294	-30.4619	-11.8519				53.9897	-26.8556	15.8492	52.328	-23.84	-6.14177				53.2872	-30.9913	13.0275		68.2626	-22.073	-12.6748	66.9422	-24.6289	-5.06129							67.8031	-31.5221	2.31432	65.0407	-24.839	5.83616
50.2427	-26.5533	-11.5119				51.0042	-30.4534	15.9522	51.065	-36.4625	-5.7701				51.8885	-30.1735	7.50826		68.9895	-21.8998	-18.7748	67.2854	-22.9088	-1.44842							67.7307	-27.0839	6.27349	69.976	-23.8529	2.86188
48.6985	-30.6831	-12.0884				50.7078	-30.5301	10.9071	53.377	-38.8791	-2.33002				53.0971	-33.5564	7.0639		59.5553	-22.5062	-13.0932	66.4848	-22.4543	-2.79435							67.4137	-29.4197	5.94469	68.9208	-27.3854	3.16608
49.1974	-26.3705	-14.007				54.5709	-24.5346	17.6446	51.5542	-31.2617	-14.2408				50.4597	-32.6904	10.5941		68.8403	-22.0958	-11.3553	66.3798	-24.3127	-3.83896							70.4635	-29.2647	4.12427	66.9111	-24.3243	7.30902
48.3111	-27.7275	-11.0774				45.3407	-34.9608	10.2281	49.179	-29.5614	-8.05179				54.5929	-32.1904	12.1133		63.2248	-22.9024	-9.57957	65.8072	-20.9597	-3.31022							68.2965	-33.0543	4.58119	69.5381	-25.5061	4.31023
47.2141	-27.6128	-23.4197				57.8578	-20.6187	7.5136	53.5995	-23.5718	-4.04514				51.7228	-32.9433	11.5909		67.2495	-26.0957	-14.2188	71.1547	-20.5452	-4.95744							68.4999	-31.1608	3.77772	66.2651	-25.6698	4.62136
47.3162	-32.4336	-18.2608				59.6697	-26.2418	-1.02501	50.4886	-33.7929	-6.236				52.3374	-28.8199	12.3496		69.857	-22.4388	-16.4292	68.1563	-23.9203	-6.57138							67.8473	-28.7465	3.11029	68.6718	-23.8976	3.30567
52.2349	-26.1647	-15.657				53.1816	-26.1186	14.4684	52.5686	-29.8182	-12.5044				50.3814	-31.1539	7.69484		69.6048	-21.0149	-14.3154	67.9969	-20.3815	-2.89307							66.6388	-33.0395	1.48123	66.5301	-25.2666	-2.03873
51.4232	-28.2277	-14.9189				52.9969	-29.942	16.8061	53.4505	-28.7797	-13.3031				55.726	-27.0707	9.74279		68.8665	-22.2438	-15.5372	69.7819	-24.4177	-5.15893							65.6838	-32.9613	7.3676	66.6489	-26.6918	2.04733
48.6236	-33.0565	-12.5928				56.8743	-24.431	17.5759	51.5203	-36.5093	-11.0485				51.3715	-28.8458	11.4129		61.6707	-20.3137	-12.8771	71.9649	-22.6701	-5.08021							67.5437	-29.3438	2.2412	68.1055	-28.9413	4.82291
51.7693	-28.4328	-15.005				46.6244	-34.6545	10.171	52.3838	-23.9504	-5.01456				45.2884	-26.5533	0.168045		66.6505	-23.2874	-16.7568	70.6681	-25.4427	-4.54362							67.2939	-31.8285	4.73826	69.2964	-26.0999	6.99079
45.7401	-32.5155	-21.5186				53.137	-28.9527	20.139	53.1752	-32.6721	-8.72527				51.5773	-26.3558	12.807		69.4843	-24.8947	-14.3783	70.7129	-22.0961	-5.80777							68.312	-31.3723	2.76919	69.9596	-24.1749	5.66947
55.1252	-25.3237	-3.07171				52.7148	-31.2899	15.8599	52.3674	-32.929	-13.7139				50.9942	-29.6416	5.5851		74.046	-21.9169	-2.91831	71.0295	-21.7551	-2.3738							67.1968	-30.3662	2.74713	70.2474	-24.8325	7.00571
48.7839	-32.4457	-12.0292				53.6732	-27.7238	17.1157	52.2562	-38.1276	-2.90411				46.175	-28.2731	11.9325		68.826	-24.3884	-12.1499	72.0697	-23.8156	-4.9121							68.9012	-31.4187	-3.51186	67.205	-27.4102	-2.04705
51.5603	-29.6304	-18.3624				52.7629	-31.5466	17.3603	51.704	-37.3433	-11.3366				44.8918	-30.3592	11.1711		67.0819	-21.3883	-18.625	72.8381	-20.9487	-2.20297							65.9105	-32.2998	3.75011	68.9706	-24.5525	7.32963
48.9732	-30.7555	-19.4271				50.647	-29.0892	20.1676	51.8858	-35.1681	-10.8532				45.9159	-30.583	9.80834		68.9247	-24.9875	-14.3212	71.9385	-24.46	-3.06476							68.4112	-32.0479	0.708007	66.2579	-26.0416	11.9736
48.4689	-34.8259	-13.8426				49.3533	-29.0842	19.9265	51.8559	-32.1163	-5.49299				45.3392	-31.4452	9.0288		63.8729	-27.1048	-11.9537	69.9016	-27.6947	-5.1602							68.5729	-29.5051	3.19778	68.2676	-25.9585	7.4573
51.3448	-27.3323	-18.0417				57.445	-23.5804	17.3748	52.1213	-37.0719	-10.9994				46.9001	-33.2861	10.1962		65.7945	-25.5966	-12.123	65.9057	-21.8814	-5.65439							66.4273	-32.9854	7.66031	67.4825	-26.9054	7.4771
51.6863	-27.6126	-18.8639				50.5101	-34.3981	16.3541	51.7244	-31.3623	-15.167				46.4111	-40.7489	14.0506		62.4713	-22.68	-9.85272	70.6566	-24.6865	-5.38424							66.7618	-30.7648	-1.4407	68.9563	-25.448	6.63089
48.374	-31.7961	-13.1345				52.1255	-29.9975	19.2558	49.9034	-27.662	-12.933								70.8999	-24.0268	-14.1248	68.2008	-25.0488	0.381853							64.7859	-31.8564	5.41891	68.7031	-27.0575	7.10412
56.5143	-25.2178	-13.6647				54.431	-30.0784	16.2283	57.7099	-29.2735	-11.3284								59.5698	-25.2147	-12.1326	71.5115	-20.9155	-4.46225							66.0527	-29.585	3.39705	68.4525	-27.9851	8.39253
48.5681	-33.1008	-19.6194				55.3222	-25.2746	15.2681	54.0565	-28.0179	-9.96542								68.5118	-24.5582	-11.3281	62.0671	-21.4003	-1.87564							66.2896	-26.769	3.76445	68.1926	-24.534	6.57044
51.2069	-26.1189	-18.3459				53.4297	-30.0203	18.3965	51.506	-40.9222	-8.68871								69.0623	-23.6715	-14.8324	74.002	-26.1922	-4.40061							66.0621	-32.6436	2.76266	69.5991	-24.9365	7.01411
47.5604	-32.5119	-21.1936				56.0367	-22.1403	21.3306	54.0195	-28.0953	-13.4907								67.3935	-21.8102	-15.8785	71.6941	-24.1595	-5.25924							66.8319	-26.8995	7.48495	66.4546	-25.4001	8.03515
51.1097	-27.4188	-12.9625				54.4584	-32.5063	11.7703	49.8383	-37.8024	-13.6795								64.9974	-24.2003	-13.681	74.8928	-24.0639	-5.41345							67.4378	-23.3237	6.58872	65.6403	-21.5517	9.35015
49.2607	-29.0492	-10.4706				54.584	-28.5175	16.6509	54.1337	-19.4431	-4.29386								62.3364	-21.4782	-9.08898	61.9953	-22.5033	4.50504							64.784	-31.7767	5.25487	68.2689	-24.8832	10.4087
48.5023	-36.2512	-19.8601				50.949	-32.4254	17.2734	50.5006	-29.6583	-6.70651								64.9644	-22.03	-11.8354	70.5963	-21.8514	-2.59445							65.1595	-31.92	4.77655	67.6425	-22.8724	7.23174
47.4907	-32.8588	-14.8002				50.3374	-24.7436	19.2426	48.5472	-35.5585	-10.8901								71.2969	-24.9685	-10.6231	71.8337	-20.7667	-2.72169							69.178	-25.4821	4.80892	66.3919	-29.4881	7.19963
49.2276	-30.2103	-11.4568				50.3634	-27.7141	18.1444	55.6869	-32.0666	-8.90852								68.7487	-24.8941	-14.8821	71.8156	-25.1942	-3.15588							67.1271	-31.0242	5.44644	67.1513	-29.1857	4.9661
47.7339	-29.8174	-20.0343				58.3776	-21.8096	15.9757	47.6307	-33.3234	-9.50524								61.3468	-21.9591	-8.21262	73.2267	-21.354	-2.04927							66.0469	-28.4949	-1.41555	70.0301	-23.8803	7.04604
47.4417	-32.8811	-10.9674				49.4922	-23.9947	17.4536	53.7229	-22.3877	-7.10462								68.9485	-24.0437	-18.4772	70.9655	-25.557	-4.90876							68.3637	-26.9633	10.1669	69.5334	-27.0798	4.59438
52.9051	-23.4317	-14.9905				54.635	-28.8768	17.8778	50.8068	-25.7112	-7.9894								63.5677	-23.4617	-10.5916	72.2981	-21.4196	-6.95355							66.7081	-28.9466	5.40735	67.5227	-27.2501	7.41976
48.5784	-28.9815	-18.6824				60.7355	-26.0869	-2.1608	51.28	-30.8831	-13.3476								67.5973	-23.5466	-6.85403	71.254	-25.7679	-4.59832							66.4452	-32.0677	4.27287	69.1215	-24.6582	6.2562
49.9346	-32.1379	-20.8076				62.5777	-24.665	-1.39192	49.9187	-40.5176	-1.46125								64.2067	-22.2484	-10.4314	71.7878	-24.3325	-5.14977							67.8965	-26.6804	2.32939	66.2234	-25.2104	7.9493
49.9161	-32.9589	-11.9542				56.0806	-24.1441	18.8624	52.4759	-27.6052	-7.94584								66.0953	-28.683	-11.9162	69.3547	-27.6187	-4.93402							70.6935	-26.7798	-1.58128	69.6906	-24.1974	6.47857
48.0593	-32.7033	-14.3924				56.0009	-24.2328	20.7496	47.7748	-33.5474	-7.95226								64.9411	-24.9367	-13.0462	73.398	-22.5761	-4.68384							67.9141	-28.5225	1.73363	68.0923	-22.2494	7.08009
52.0566	-27.0038	-18.2826				48.7491	-30.868	11.1405	48.3863	-37.312	-15.3704								70.0389	-26.0816	-13.7978	70.5811	-21.0697	-3.19189							68.4861	-27.568	2.52381	68.5666	-26.3212	3.06921
52.7411	-26.5043	-15.5351				50.4142	-34.2646	19.0983	48.2118	-32.7466	-9.79712								67.32	-25.7473	-13.7934	72.16	-25.0264	-8.09695							67.3757	-32.0223	2.89584	68.1822	-26.0664	6.02041
53.5117	-28.8302	-19.4396				52.8603	-29.3171	18.3744	53.9881	-23.3983	-4.58591								69.5879	-21.4543	-15.7818	75.3686	-20.7465	0.114206							67.2785	-29.6412	7.17561	66.2629	-22.5023	14.5216
49.2592	-32.4927	-20.3996				51.9396	-32.3951	20.7057	49.6689	-28.4139	-7.90483								67.0682	-21.8063	-12.6372	72.0155	-26.2105	-4.9099							68.5658	-26.3729	5.22837	70.5617	-25.7331	6.75226
49.8836	-35.0473	-15.1304				56.4573	-28.2183	18.4335	51.8642	-39.5145	-12.193								68.1505	-21.581	-16.9109	70.4914	-26.7905	-5.17533							71.1039	-25.3408	-0.16935	70.2247	-25.3995	13.2731
50.6123	-32.1538	-16.3676				52.8247	-26.9647	20.1269	53.5777	-29.5373	-12.9329								69.1311	-22.1498	-12.4543	75.6586	-22.6515	-5.26295							65.7458	-29.1135	5.9392	68.3681	-22.5416	7.40539
50.0508	-32.817	-13.427				55.3373	-26.1133	16.2323	44.6234	-18.4874	0.518517								64.8081	-25.5602	-14.9689	70.949	-27.558	-3.02233							66.76	-29.3472	0.750167	69.1974	-28.1017	9.32237
49.2347	-27.6988	-11.7422				47.1724	-33.1254	12.3425	53.7006	-30.0689	-11.2634								67.3042	-22.1195	-17.8909	72.737	-26.3519	-3.48921							67.3983	-24.9738	2.19924	67.8556	-24.4425	6.0996
47.4552	-32.9344	-19.4173				52.7863	-30.0979	17.5186	48.3766	-32.8134	-11.735								67.9886	-23.3274	-15.5936	68.1082	-21.9848	-12.3437							67.4154	-24.8171	-1.91661	62.5319	-29.6285	10.2337
52.767	-26.5105	-17.0383				51.8335	-29.3559	20.9269	51.3532	-31.6921	-11.7247								68.2626	-22.073	-12.6748	65.9478	-26.0144	-4.59699							67.555	-29.9586	4.33668	68.5888	-29.3551	7.48823
49.6092	-28.9929	-12.7822				53.073	-27.9677	17.9034	53.1996	-24.5203	-6.18537								68.9895	-21.8998	-18.7748	68.2188	-22.8477	-2.33083							65.8423	-30.4652	7.58733	66.7544	-21.5782	8.74926
50.22	-27.9252	-17.2788				55.1796	-25.6828	16.1775	52.0584	-24.7127	-8.0921								59.5553	-22.5062	-13.0932	72.1218	-22.4634	-7.56071							66.7145	-28.5103	5.46719	68.4288	-28.6759	4.99366
49.0403	-33.2103	-19.5864				51.4706	-32.37	19.2216	54.406	-29.0894	-7.33539								68.8403	-22.0958	-11.3553	71.0533	-22.6856	-3.07014							71.1571	-24.2864	5.21002	68.1611	-26.9157	6.60307
49.158	-29.5348	-12.7696				47.6717	-37.3121	16.6337	55.1349	-16.355	-2.8034								63.2248	-22.9024	-9.57957	65.0424	-24.6069	-4.86522							68.7705	-29.0902	-1.32635	68.5103	-28.019	6.12924
51.335	-29.271	-17.6015				49.6055	-30.6428	19.408	53.6827	-23.3025	-9.1119								67.2495	-26.0957	-14.2188	69.8648	-22.6557	-3.88836							70.7104	-23.6997	1.27905	69.7894	-27.2346	7.72178
47.4774	-32.6041	-12.8981				56.626	-26.7559	18.9136	50.281	-32.6605	-7.75377								69.857	-22.4388	-16.4292	66.9422	-24.6289	-5.06129							69.9391	-27.3934	-1.82957	69.1535	-26.8446	-3.77629
50.4766	-28.3019	-16.9049				51.5139	-26.2252	8.12519	53.9273	-17.5637	-2.46738								69.6048	-21.0149	-14.3154	67.2854	-22.9088	-1.44842							68.2244	-32.0198	3.8856	67.1156	-21.5567	8.02248
55.2976	-25.7926	-16.0568				52.808	-28.9311	17.0435	48.5846	-30.461	-8.38989								68.8665	-22.2438	-15.5372	66.4848	-22.4543	-2.79435							67.1453	-32.6444	6.3566	68.3688	-25.9556	11.399
48.0916	-34.2644	-13.8372				52.4268	-28.7239	18.1982	54.0022	-26.4349	-10.9284								61.6707	-20.3137	-12.8771	66.3798	-24.3127	-3.83896							67.9411	-23.0068	2.43076	68.0731	-24.0881	5.83805
49.539	-30.3895	-12.5976				52.2717	-31.6391	21.0415	55.4103	-22.6416	-0.13502								66.6505	-23.2874	-16.7568	65.8072	-20.9597	-3.31022							70.306	-24.9351	5.34797	69.3239	-28.2469	5.05131
48.9378	-32.3736	-15.2018				52.7441	-30.1504	18.218	51.9078	-37.5211	-0.424701								69.4843	-24.8947	-14.3783	71.1547	-20.5452	-4.95744							67.4711	-31.1825	1.56708	70.6189	-24.7739	4.79151
55.0315	-27.9306	-16.3193				51.9347	-26.1983	16.4519	51.9629	-29.8555	-12.6317								74.046	-21.9169	-2.91831	68.1563	-23.9203	-6.57138							66.8684	-28.2788	3.89487	69.0325	-23.4313	4.91307
49.8317	-29.9221	-17.1626				54.97	-28.0561	14.3375	46.5229	-14.657	-2.1737								68.826	-24.3884	-12.1499	67.9969	-20.3815	-2.89307							69.0025	-30.1527	0.359976	69.0545	-23.4521	5.06818
50.883	-29.4469	-18.1168				46.7137	-34.4927	16.1804	54.4868	-25.2417	-4.93128								67.0819	-21.3883	-18.625	69.7819	-24.4177	-5.15893							67.2586	-33.0315	2.80992	65.2914	-25.9065	12.0321
48.711	-30.876	-21.6536				58.1823	-27.3313	21.2833	49.8946	-27.0259	-7.22628								68.9247	-24.9875	-14.3212	71.9649	-22.6701	-5.08021							66.3392	-31.5328	6.15862	64.4494	-31.3713	12.8062
50.5949	-26.2853	-17.2699				53.3635	-34.6901	16.4226	51.5882	-36.0272	-12.188								63.8729	-27.1048	-11.9537	70.6681	-25.4427	-4.54362							72.3242	-25.2917	0.918017	69.6911	-27.4359	7.67008
52.557	-26.3794	-15.6126				54.2601	-28.2385	13.0683	52.2535	-31.614	-14.4991								65.7945	-25.5966	-12.123	70.7129	-22.0961	-5.80777							66.9158	-30.1179	8.86169	67.8463	-26.1228	8.86116
48.081	-32.6848	-14.512				52.8268	-28.1655	16.6423	49.3686	-29.5222	-9.48178								62.4713	-22.68	-9.85272	71.0295	-21.7551	-2.3738							68.1587	-24.7024	0.850108	67.7851	-28.2643	8.19473
50.4604	-30.5974	-18.5508				51.8803	-27.4861	15.8694	46.3182	-15.084	-2.15643								70.8999	-24.0268	-14.1248	72.0697	-23.8156	-4.9121							68.5216	-25.9894	5.14782	67.0859	-30.4415	13.0193
49.6999	-30.1465	-18.1743				55.6896	-24.586	16.4611	49.445	-37.5047	-2.02687								59.5698	-25.2147	-12.1326	72.8381	-20.9487	-2.20297							69.5901	-24.4926	-0.776124	69.1239	-27.9933	6.56054
49.1383	-28.9006	-18.5149				54.0082	-31.2976	17.051	54.0145	-31.8829	-10.1453								68.5118	-24.5582	-11.3281	71.9385	-24.46	-3.06476							67.1467	-31.9916	1.50851	69.7095	-26.069	7.20917
51.1393	-27.5282	-17.4809				54.4913	-28.1007	16.2896	53.3236	-36.3178	-11.3944								69.0623	-23.6715	-14.8324	69.9016	-27.6947	-5.1602							64.4305	-32.9882	6.1609	65.0407	-24.839	5.83616
48.3121	-33.0036	-10.7396				54.8396	-26.5792	17.3135	52.708	-35.7481	-11.4145								67.3935	-21.8102	-15.8785	65.9057	-21.8814	-5.65439							66.4777	-31.4165	3.68138	69.976	-23.8529	2.86188
51.9974	-25.5381	-14.8793				53.9897	-26.8556	15.8492	50.2466	-35.3521	-8.84033								64.9974	-24.2003	-13.681	70.6566	-24.6865	-5.38424							70.8128	-29.9859	1.12596	68.9208	-27.3854	3.16608
48.6859	-34.8538	-19.8697				51.0042	-30.4534	15.9522	52.328	-23.84	-6.14177								62.3364	-21.4782	-9.08898	68.2008	-25.0488	0.381853							69.0363	-31.2214	2.40694	66.9111	-24.3243	7.30902
48.3336	-32.6346	-14.1869				50.7078	-30.5301	10.9071	51.065	-36.4625	-5.7701								64.9644	-22.03	-11.8354	71.5115	-20.9155	-4.46225							68.9509	-30.7487	-0.736645	69.5381	-25.5061	4.31023
49.5589	-28.5856	-18.7273				54.5709	-24.5346	17.6446	51.4453	-38.3841	-6.33797								71.2969	-24.9685	-10.6231	62.0671	-21.4003	-1.87564							64.6	-33.9825	4.89281	66.2651	-25.6698	4.62136
50.8171	-26.518	-17.6911				45.3407	-34.9608	10.2281	53.377	-38.8791	-2.33002								68.7487	-24.8941	-14.8821	74.002	-26.1922	-4.40061							68.7736	-29.2174	3.75242	68.6718	-23.8976	3.30567
52.0679	-27.4518	-18.0964				57.8578	-20.6187	7.5136	51.5542	-31.2617	-14.2408								61.3468	-21.9591	-8.21262	71.6941	-24.1595	-5.25924							64.1419	-31.6902	4.72166	66.5301	-25.2666	-2.03873
50.9745	-28.6456	-18.6928				55.3898	-22.8481	17.0939	49.179	-29.5614	-8.05179								68.9485	-24.0437	-18.4772	74.8928	-24.0639	-5.41345							66.0211	-29.8104	3.47874	66.6489	-26.6918	2.04733
48.3201	-31.8225	-19.2924				59.6697	-26.2418	-1.02501	53.5995	-23.5718	-4.04514								63.5677	-23.4617	-10.5916	61.9953	-22.5033	4.50504							69.6033	-29.3302	3.70294	68.1055	-28.9413	4.82291
48.914	-33.5757	-12.7966				53.1816	-26.1186	14.4684	50.4886	-33.7929	-6.236								67.5973	-23.5466	-6.85403	70.5963	-21.8514	-2.59445							71.2726	-26.0197	0.0376982	69.2964	-26.0999	6.99079
50.4496	-30.0804	-12.4897				52.9969	-29.942	16.8061	52.7974	-37.769	-3.12201								64.2067	-22.2484	-10.4314	71.8337	-20.7667	-2.72169							68.0444	-24.5355	2.74802	69.9596	-24.1749	5.66947
51.362	-27.5635	-18.2797				56.8743	-24.431	17.5759	52.5686	-29.8182	-12.5044								66.0953	-28.683	-11.9162	71.8156	-25.1942	-3.15588							67.8031	-31.5221	2.31432	70.2474	-24.8325	7.00571
51.3647	-26.677	-18.8459				46.6244	-34.6545	10.171	53.4505	-28.7797	-13.3031								64.9411	-24.9367	-13.0462	73.2267	-21.354	-2.04927							67.7307	-27.0839	6.27349	67.205	-27.4102	-2.04705
48.0247	-31.9469	-11.1319				53.137	-28.9527	20.139	51.5203	-36.5093	-11.0485								70.0389	-26.0816	-13.7978	70.9655	-25.557	-4.90876							67.4137	-29.4197	5.94469	68.9706	-24.5525	7.32963
49.5324	-29.1618	-18.8372				57.8567	-22.2668	15.6249	52.3838	-23.9504	-5.01456								67.32	-25.7473	-13.7934	72.2981	-21.4196	-6.95355							70.4635	-29.2647	4.12427	66.2579	-26.0416	11.9736
54.6295	-27.4033	-14.197				52.7148	-31.2899	15.8599	53.1752	-32.6721	-8.72527								69.5879	-21.4543	-15.7818	71.254	-25.7679	-4.59832							68.2965	-33.0543	4.58119	68.2676	-25.9585	7.4573
48.3512	-32.3816	-14.2608				53.6732	-27.7238	17.1157	51.9487	-33.7744	-10.548								67.0682	-21.8063	-12.6372	71.7878	-24.3325	-5.14977							68.4999	-31.1608	3.77772	67.4825	-26.9054	7.4771
56.9111	-25.3308	-11.7763				52.7629	-31.5466	17.3603	52.3674	-32.929	-13.7139								68.1505	-21.581	-16.9109	69.3547	-27.6187	-4.93402							67.8473	-28.7465	3.11029	68.9563	-25.448	6.63089
49.5458	-27.2748	-18.4357				50.647	-29.0892	20.1676	52.2562	-38.1276	-2.90411								69.1311	-22.1498	-12.4543	73.398	-22.5761	-4.68384							66.6388	-33.0395	1.48123	68.7031	-27.0575	7.10412
49.9649	-27.8763	-19.268				49.3533	-29.0842	19.9265	51.704	-37.3433	-11.3366								64.8081	-25.5602	-14.9689	70.5811	-21.0697	-3.19189							65.6838	-32.9613	7.3676	68.4525	-27.9851	8.39253
50.1171	-34.3486	-16.4954				57.445	-23.5804	17.3748	51.8858	-35.1681	-10.8532								67.3042	-22.1195	-17.8909	72.16	-25.0264	-8.09695							67.5437	-29.3438	2.2412	68.1926	-24.534	6.57044
48.5607	-29.2289	-15.2738				43.2043	-38.6257	-3.95058	51.8559	-32.1163	-5.49299								67.9886	-23.3274	-15.5936	75.3686	-20.7465	0.114206							67.2939	-31.8285	4.73826	69.5991	-24.9365	7.01411
52.8147	-27.6455	-17.7063				50.5101	-34.3981	16.3541	54.6219	-21.734	-5.32489								68.2626	-22.073	-12.6748	72.0155	-26.2105	-4.9099							68.312	-31.3723	2.76919	66.4546	-25.4001	8.03515
58.9064	-21.3163	-4.39237				52.1255	-29.9975	19.2558	52.1213	-37.0719	-10.9994								68.9895	-21.8998	-18.7748	70.4914	-26.7905	-5.17533							67.1968	-30.3662	2.74713	65.6403	-21.5517	9.35015
52.8265	-26.2504	-17.7119				54.431	-30.0784	16.2283	51.7244	-31.3623	-15.167								59.5553	-22.5062	-13.0932	75.6586	-22.6515	-5.26295							68.9012	-31.4187	-3.51186	68.2689	-24.8832	10.4087
51.4189	-28.8224	-15.8776				55.3222	-25.2746	15.2681	49.9034	-27.662	-12.933								68.8403	-22.0958	-11.3553	70.949	-27.558	-3.02233							65.9105	-32.2998	3.75011	67.6425	-22.8724	7.23174
52.1714	-28.1744	-16.5122				53.4297	-30.0203	18.3965	57.7099	-29.2735	-11.3284								63.2248	-22.9024	-9.57957	72.737	-26.3519	-3.48921							68.4112	-32.0479	0.708007	66.3919	-29.4881	7.19963
51.8104	-29.7977	-16.2611				56.0367	-22.1403	21.3306	54.0565	-28.0179	-9.96542								67.2495	-26.0957	-14.2188	68.1082	-21.9848	-12.3437							68.5729	-29.5051	3.19778	67.1513	-29.1857	4.9661
49.3294	-30.4619	-11.8519				57.0496	-25.6389	18.8573	52.5644	-26.5843	-8.397								69.857	-22.4388	-16.4292	65.9478	-26.0144	-4.59699							66.4273	-32.9854	7.66031	70.0301	-23.8803	7.04604
50.2427	-26.5533	-11.5119				54.4584	-32.5063	11.7703	51.506	-40.9222	-8.68871								69.6048	-21.0149	-14.3154	68.2188	-22.8477	-2.33083							66.7618	-30.7648	-1.4407	69.5334	-27.0798	4.59438
48.6985	-30.6831	-12.0884				54.584	-28.5175	16.6509	54.0195	-28.0953	-13.4907								68.8665	-22.2438	-15.5372	72.1218	-22.4634	-7.56071							64.7859	-31.8564	5.41891	67.5227	-27.2501	7.41976
50.261	-26.5057	-11.6185				50.949	-32.4254	17.2734	49.8383	-37.8024	-13.6795								61.6707	-20.3137	-12.8771	71.0533	-22.6856	-3.07014							66.0527	-29.585	3.39705	69.1215	-24.6582	6.2562
49.1974	-26.3705	-14.007				50.3374	-24.7436	19.2426	54.1337	-19.4431	-4.29386								66.6505	-23.2874	-16.7568	65.0424	-24.6069	-4.86522							66.2896	-26.769	3.76445	66.2234	-25.2104	7.9493
48.3111	-27.7275	-11.0774				50.3634	-27.7141	18.1444	50.5006	-29.6583	-6.70651								69.4843	-24.8947	-14.3783	69.8648	-22.6557	-3.88836							66.0621	-32.6436	2.76266	69.6906	-24.1974	6.47857
47.2141	-27.6128	-23.4197				58.3776	-21.8096	15.9757	49.5786	-31.4241	-5.69866								74.046	-21.9169	-2.91831	66.9422	-24.6289	-5.06129							66.8319	-26.8995	7.48495	68.0923	-22.2494	7.08009
47.3162	-32.4336	-18.2608				55.9088	-22.9587	20.3943	48.5472	-35.5585	-10.8901								68.826	-24.3884	-12.1499	67.2854	-22.9088	-1.44842							67.4378	-23.3237	6.58872	68.5666	-26.3212	3.06921
52.2349	-26.1647	-15.657				49.4922	-23.9947	17.4536	55.6869	-32.0666	-8.90852								67.0819	-21.3883	-18.625	66.4848	-22.4543	-2.79435							64.784	-31.7767	5.25487	68.1822	-26.0664	6.02041
51.4232	-28.2277	-14.9189				54.635	-28.8768	17.8778	47.6307	-33.3234	-9.50524								68.9247	-24.9875	-14.3212	66.3798	-24.3127	-3.83896							65.1595	-31.92	4.77655	66.2629	-22.5023	14.5216
48.6236	-33.0565	-12.5928				60.7355	-26.0869	-2.1608	53.7229	-22.3877	-7.10462								63.8729	-27.1048	-11.9537	71.8667	-23.3261	7.04577							69.178	-25.4821	4.80892	70.5617	-25.7331	6.75226
48.9155	-28.9584	-16.8156				62.5777	-24.665	-1.39192	50.8068	-25.7112	-7.9894								65.7945	-25.5966	-12.123	65.8072	-20.9597	-3.31022							67.1271	-31.0242	5.44644	70.2247	-25.3995	13.2731
51.7693	-28.4328	-15.005				56.0806	-24.1441	18.8624	50.2202	-26.1237	-9.60225								62.4713	-22.68	-9.85272	71.1547	-20.5452	-4.95744							66.0469	-28.4949	-1.41555	68.3681	-22.5416	7.40539
45.7401	-32.5155	-21.5186				56.0009	-24.2328	20.7496	51.28	-30.8831	-13.3476								70.8999	-24.0268	-14.1248	68.1563	-23.9203	-6.57138							68.3637	-26.9633	10.1669	69.1974	-28.1017	9.32237
55.1252	-25.3237	-3.07171				55.2411	-27.8757	18.4359	49.9187	-40.5176	-1.46125								59.5698	-25.2147	-12.1326	67.9969	-20.3815	-2.89307							66.7081	-28.9466	5.40735	67.8556	-24.4425	6.0996
48.7839	-32.4457	-12.0292				48.7491	-30.868	11.1405	52.4759	-27.6052	-7.94584								68.5118	-24.5582	-11.3281	69.7819	-24.4177	-5.15893							66.4452	-32.0677	4.27287	62.5319	-29.6285	10.2337
51.5603	-29.6304	-18.3624				50.4142	-34.2646	19.0983	47.7748	-33.5474	-7.95226								69.0623	-23.6715	-14.8324	71.9649	-22.6701	-5.08021							67.8965	-26.6804	2.32939	68.5888	-29.3551	7.48823
48.9732	-30.7555	-19.4271				52.8603	-29.3171	18.3744	51.1275	-32.5667	-10.3143								67.3935	-21.8102	-15.8785	70.6681	-25.4427	-4.54362							70.6935	-26.7798	-1.58128	66.7544	-21.5782	8.74926
48.4689	-34.8259	-13.8426				51.9396	-32.3951	20.7057	48.3863	-37.312	-15.3704								64.9974	-24.2003	-13.681	70.7129	-22.0961	-5.80777							67.9141	-28.5225	1.73363	68.4288	-28.6759	4.99366
48.0668	-26.7702	-11.9969				56.4573	-28.2183	18.4335	48.2118	-32.7466	-9.79712								62.3364	-21.4782	-9.08898	71.0295	-21.7551	-2.3738							68.4861	-27.568	2.52381	68.1611	-26.9157	6.60307
51.3448	-27.3323	-18.0417				52.8247	-26.9647	20.1269	53.9881	-23.3983	-4.58591								64.9644	-22.03	-11.8354	72.0697	-23.8156	-4.9121							68.4918	-27.822	3.97906	68.5103	-28.019	6.12924
51.6863	-27.6126	-18.8639				50.1746	-28.0237	18.7335	49.6689	-28.4139	-7.90483								71.2969	-24.9685	-10.6231	73.437	-24.628	-0.847185							67.3757	-32.0223	2.89584	69.7894	-27.2346	7.72178
48.374	-31.7961	-13.1345				55.3373	-26.1133	16.2323	52.1182	-31.4715	-11.3751								68.7487	-24.8941	-14.8821	72.8381	-20.9487	-2.20297							67.2785	-29.6412	7.17561	69.1535	-26.8446	-3.77629
56.5143	-25.2178	-13.6647				47.1724	-33.1254	12.3425	51.8642	-39.5145	-12.193								61.3468	-21.9591	-8.21262	71.9385	-24.46	-3.06476							68.5658	-26.3729	5.22837	67.1156	-21.5567	8.02248
48.5681	-33.1008	-19.6194				52.7863	-30.0979	17.5186	53.5777	-29.5373	-12.9329								68.9485	-24.0437	-18.4772	69.9016	-27.6947	-5.1602							71.1039	-25.3408	-0.16935	68.3688	-25.9556	11.399
51.2069	-26.1189	-18.3459				51.8335	-29.3559	20.9269	44.6234	-18.4874	0.518517								63.5677	-23.4617	-10.5916	65.9057	-21.8814	-5.65439							65.7458	-29.1135	5.9392	68.0731	-24.0881	5.83805
47.5604	-32.5119	-21.1936				53.073	-27.9677	17.9034	53.7006	-30.0689	-11.2634								67.5973	-23.5466	-6.85403	70.6566	-24.6865	-5.38424							66.76	-29.3472	0.750167	69.3239	-28.2469	5.05131
50.2434	-29.0726	-15.5848				55.1796	-25.6828	16.1775	50.6961	-29.0334	-7.98243								64.2067	-22.2484	-10.4314	68.2008	-25.0488	0.381853							67.3983	-24.9738	2.19924	70.6189	-24.7739	4.79151
51.1097	-27.4188	-12.9625				51.4706	-32.37	19.2216	48.3766	-32.8134	-11.735								66.0953	-28.683	-11.9162	71.5115	-20.9155	-4.46225							67.4154	-24.8171	-1.91661	69.0325	-23.4313	4.91307
49.2607	-29.0492	-10.4706				47.6717	-37.3121	16.6337	51.3532	-31.6921	-11.7247								64.9411	-24.9367	-13.0462	62.0671	-21.4003	-1.87564							70.8095	-28.2287	-0.685545	69.0545	-23.4521	5.06818
48.5023	-36.2512	-19.8601				49.6055	-30.6428	19.408	53.1996	-24.5203	-6.18537								70.0389	-26.0816	-13.7978	74.002	-26.1922	-4.40061							67.555	-29.9586	4.33668	65.2914	-25.9065	12.0321
47.4907	-32.8588	-14.8002				56.626	-26.7559	18.9136	52.0584	-24.7127	-8.0921								67.32	-25.7473	-13.7934	71.6941	-24.1595	-5.25924							65.8423	-30.4652	7.58733	64.4494	-31.3713	12.8062
49.2276	-30.2103	-11.4568				51.5139	-26.2252	8.12519	54.406	-29.0894	-7.33539								69.5879	-21.4543	-15.7818	71.7202	-26.9721	-6.25879							66.7145	-28.5103	5.46719	69.6911	-27.4359	7.67008
47.7339	-29.8174	-20.0343				52.808	-28.9311	17.0435	55.1349	-16.355	-2.8034								67.0682	-21.8063	-12.6372	74.8928	-24.0639	-5.41345							71.1571	-24.2864	5.21002	67.8463	-26.1228	8.86116
47.4417	-32.8811	-10.9674				52.4268	-28.7239	18.1982	53.6827	-23.3025	-9.1119								68.1505	-21.581	-16.9109	61.9953	-22.5033	4.50504							68.7705	-29.0902	-1.32635	67.7851	-28.2643	8.19473
52.4597	-26.5964	-15.908				52.2717	-31.6391	21.0415	50.281	-32.6605	-7.75377								69.1311	-22.1498	-12.4543	70.5963	-21.8514	-2.59445							70.7104	-23.6997	1.27905	67.0859	-30.4415	13.0193
52.9051	-23.4317	-14.9905				52.7441	-30.1504	18.218	53.9273	-17.5637	-2.46738								64.8081	-25.5602	-14.9689	71.8337	-20.7667	-2.72169							69.9391	-27.3934	-1.82957
48.5784	-28.9815	-18.6824				51.9347	-26.1983	16.4519	48.5846	-30.461	-8.38989								67.3042	-22.1195	-17.8909	71.8156	-25.1942	-3.15588							69.9862	-29.4104	-1.94923
49.9346	-32.1379	-20.8076				54.97	-28.0561	14.3375	54.0022	-26.4349	-10.9284								67.9886	-23.3274	-15.5936	73.2267	-21.354	-2.04927							68.2244	-32.0198	3.8856
49.9161	-32.9589	-11.9542				46.7137	-34.4927	16.1804	55.4103	-22.6416	-0.13502								68.2626	-22.073	-12.6748	70.9655	-25.557	-4.90876							67.1453	-32.6444	6.3566
48.0593	-32.7033	-14.3924				58.1823	-27.3313	21.2833	51.9078	-37.5211	-0.424701								68.9895	-21.8998	-18.7748	72.2981	-21.4196	-6.95355							67.9411	-23.0068	2.43076
52.0566	-27.0038	-18.2826				53.3635	-34.6901	16.4226	51.9629	-29.8555	-12.6317								59.5553	-22.5062	-13.0932	68.6333	-21.636	-2.3211							70.306	-24.9351	5.34797
52.7411	-26.5043	-15.5351				54.2601	-28.2385	13.0683	46.5229	-14.657	-2.1737								68.8403	-22.0958	-11.3553	71.254	-25.7679	-4.59832							67.4711	-31.1825	1.56708
49.5843	-30.2175	-20.344				52.8268	-28.1655	16.6423	54.4868	-25.2417	-4.93128								63.2248	-22.9024	-9.57957	71.7878	-24.3325	-5.14977							66.8684	-28.2788	3.89487
53.5117	-28.8302	-19.4396				51.8803	-27.4861	15.8694	49.8946	-27.0259	-7.22628								67.2495	-26.0957	-14.2188	69.3547	-27.6187	-4.93402							69.0025	-30.1527	0.359976
49.2592	-32.4927	-20.3996				55.6896	-24.586	16.4611	51.5882	-36.0272	-12.188								69.857	-22.4388	-16.4292	73.398	-22.5761	-4.68384							71.1463	-25.826	-0.273645
49.8836	-35.0473	-15.1304				54.0082	-31.2976	17.051	52.2535	-31.614	-14.4991								69.6048	-21.0149	-14.3154	70.5811	-21.0697	-3.19189							67.2586	-33.0315	2.80992
50.6123	-32.1538	-16.3676				54.4913	-28.1007	16.2896	49.3686	-29.5222	-9.48178								68.8665	-22.2438	-15.5372	72.16	-25.0264	-8.09695							66.3392	-31.5328	6.15862
50.0508	-32.817	-13.427				54.8396	-26.5792	17.3135	46.3182	-15.084	-2.15643								61.6707	-20.3137	-12.8771	72.2859	-24.6225	-2.23215							72.3242	-25.2917	0.918017
49.2347	-27.6988	-11.7422				54.4521	-26.1478	18.4378	49.445	-37.5047	-2.02687								66.6505	-23.2874	-16.7568	75.3686	-20.7465	0.114206							66.9158	-30.1179	8.86169
47.4552	-32.9344	-19.4173				53.9897	-26.8556	15.8492	54.0145	-31.8829	-10.1453								69.4843	-24.8947	-14.3783	72.0155	-26.2105	-4.9099							68.1587	-24.7024	0.850108
51.9157	-26.5315	-15.3631				51.0042	-30.4534	15.9522	53.3236	-36.3178	-11.3944								74.046	-21.9169	-2.91831	70.4914	-26.7905	-5.17533							68.5216	-25.9894	5.14782
52.767	-26.5105	-17.0383				50.7078	-30.5301	10.9071	52.708	-35.7481	-11.4145								68.826	-24.3884	-12.1499	75.6586	-22.6515	-5.26295							69.5901	-24.4926	-0.776124
49.6092	-28.9929	-12.7822				54.5709	-24.5346	17.6446	50.2466	-35.3521	-8.84033								67.0819	-21.3883	-18.625	73.3502	-22.2583	-6.0716							70.6775	-28.4434	-0.902882
50.22	-27.9252	-17.2788				45.3407	-34.9608	10.2281	52.328	-23.84	-6.14177								68.9247	-24.9875	-14.3212	70.949	-27.558	-3.02233							67.1467	-31.9916	1.50851
49.0403	-33.2103	-19.5864				57.8578	-20.6187	7.5136	51.065	-36.4625	-5.7701								63.8729	-27.1048	-11.9537	72.737	-26.3519	-3.48921							64.4305	-32.9882	6.1609
49.158	-29.5348	-12.7696				55.3898	-22.8481	17.0939	51.4453	-38.3841	-6.33797								65.7945	-25.5966	-12.123	72.1056	-26.852	-2.27056							66.4777	-31.4165	3.68138
51.335	-29.271	-17.6015				51.2126	-25.8766	20.1985	53.377	-38.8791	-2.33002								62.4713	-22.68	-9.85272	68.1082	-21.9848	-12.3437							70.8128	-29.9859	1.12596
47.4774	-32.6041	-12.8981				59.6697	-26.2418	-1.02501	51.5542	-31.2617	-14.2408								70.8999	-24.0268	-14.1248										69.0363	-31.2214	2.40694
51.8573	-25.4557	-20.0783				53.1816	-26.1186	14.4684	49.179	-29.5614	-8.05179								59.5698	-25.2147	-12.1326										68.9509	-30.7487	-0.736645
50.4766	-28.3019	-16.9049				52.9969	-29.942	16.8061	53.5995	-23.5718	-4.04514								68.5118	-24.5582	-11.3281										70.8132	-28.8834	-1.86299
55.2976	-25.7926	-16.0568				56.8743	-24.431	17.5759	50.4886	-33.7929	-6.236								69.0623	-23.6715	-14.8324										64.6	-33.9825	4.89281
48.0916	-34.2644	-13.8372				46.6244	-34.6545	10.171	52.7974	-37.769	-3.12201								67.3935	-21.8102	-15.8785										68.7736	-29.2174	3.75242
49.539	-30.3895	-12.5976				53.137	-28.9527	20.139	52.5686	-29.8182	-12.5044								64.9974	-24.2003	-13.681										64.1419	-31.6902	4.72166
48.9378	-32.3736	-15.2018				57.8567	-22.2668	15.6249	53.4505	-28.7797	-13.3031								62.3364	-21.4782	-9.08898										66.0211	-29.8104	3.47874
55.0315	-27.9306	-16.3193				51.5347	-27.5461	18.0279	51.5203	-36.5093	-11.0485								64.9644	-22.03	-11.8354										69.6033	-29.3302	3.70294
49.8317	-29.9221	-17.1626				52.7148	-31.2899	15.8599	52.3838	-23.9504	-5.01456								71.2969	-24.9685	-10.6231										71.2726	-26.0197	0.0376982
51.0908	-26.6015	-13.4502				53.6732	-27.7238	17.1157	53.1752	-32.6721	-8.72527								68.7487	-24.8941	-14.8821										68.0444	-24.5355	2.74802
50.883	-29.4469	-18.1168				52.7629	-31.5466	17.3603	51.9487	-33.7744	-10.548								61.3468	-21.9591	-8.21262										62.7401	-22.244	6.11989
48.711	-30.876	-21.6536				50.647	-29.0892	20.1676	52.3674	-32.929	-13.7139								68.9485	-24.0437	-18.4772										67.8031	-31.5221	2.31432
50.5949	-26.2853	-17.2699				49.3533	-29.0842	19.9265	52.2562	-38.1276	-2.90411								63.5677	-23.4617	-10.5916										67.7307	-27.0839	6.27349
52.557	-26.3794	-15.6126				57.445	-23.5804	17.3748	51.704	-37.3433	-11.3366								67.5973	-23.5466	-6.85403										67.4137	-29.4197	5.94469
48.081	-32.6848	-14.512				43.2043	-38.6257	-3.95058	51.8858	-35.1681	-10.8532								64.2067	-22.2484	-10.4314										70.4635	-29.2647	4.12427
50.4604	-30.5974	-18.5508				47.8991	-38.7558	17.9474	51.8559	-32.1163	-5.49299								66.0953	-28.683	-11.9162										68.2965	-33.0543	4.58119
49.6999	-30.1465	-18.1743				50.5101	-34.3981	16.3541	54.6219	-21.734	-5.32489								64.9411	-24.9367	-13.0462										68.4999	-31.1608	3.77772
61.3152	-22.4259	-6.22815				52.1255	-29.9975	19.2558	52.1213	-37.0719	-10.9994								70.0389	-26.0816	-13.7978										67.8473	-28.7465	3.11029
49.1383	-28.9006	-18.5149				54.431	-30.0784	16.2283	51.7244	-31.3623	-15.167								67.32	-25.7473	-13.7934										67.7145	-25.9103	-3.80354
51.1393	-27.5282	-17.4809				55.3222	-25.2746	15.2681	49.9034	-27.662	-12.933								69.5879	-21.4543	-15.7818										66.6388	-33.0395	1.48123
48.3121	-33.0036	-10.7396				53.4297	-30.0203	18.3965	57.7099	-29.2735	-11.3284								67.0682	-21.8063	-12.6372										65.6838	-32.9613	7.3676
51.9974	-25.5381	-14.8793				56.0367	-22.1403	21.3306	54.0565	-28.0179	-9.96542								68.1505	-21.581	-16.9109										67.5437	-29.3438	2.2412
48.6859	-34.8538	-19.8697				57.0496	-25.6389	18.8573	52.5644	-26.5843	-8.397								69.1311	-22.1498	-12.4543										67.2939	-31.8285	4.73826
48.3336	-32.6346	-14.1869				51.8235	-35.4081	17.789	51.506	-40.9222	-8.68871								64.8081	-25.5602	-14.9689										68.312	-31.3723	2.76919
49.5589	-28.5856	-18.7273				54.4584	-32.5063	11.7703	54.0195	-28.0953	-13.4907								67.3042	-22.1195	-17.8909										67.1968	-30.3662	2.74713
50.3495	-28.1958	-13.266				54.584	-28.5175	16.6509	49.8383	-37.8024	-13.6795								67.9886	-23.3274	-15.5936										68.9012	-31.4187	-3.51186
50.8171	-26.518	-17.6911				50.949	-32.4254	17.2734	54.1337	-19.4431	-4.29386								68.2626	-22.073	-12.6748										65.9105	-32.2998	3.75011
52.0679	-27.4518	-18.0964				50.3374	-24.7436	19.2426	50.5006	-29.6583	-6.70651								68.9895	-21.8998	-18.7748										68.4112	-32.0479	0.708007
50.9745	-28.6456	-18.6928				50.3634	-27.7141	18.1444	49.5786	-31.4241	-5.69866								59.5553	-22.5062	-13.0932										68.5729	-29.5051	3.19778
48.3201	-31.8225	-19.2924				58.3776	-21.8096	15.9757	48.5472	-35.5585	-10.8901								68.8403	-22.0958	-11.3553										66.4273	-32.9854	7.66031
48.914	-33.5757	-12.7966				55.9088	-22.9587	20.3943	55.6869	-32.0666	-8.90852								63.2248	-22.9024	-9.57957										66.7618	-30.7648	-1.4407
50.4496	-30.0804	-12.4897				52.8272	-27.651	19.4889	47.6307	-33.3234	-9.50524								67.2495	-26.0957	-14.2188										64.7859	-31.8564	5.41891
51.362	-27.5635	-18.2797				49.4922	-23.9947	17.4536	53.7229	-22.3877	-7.10462								69.857	-22.4388	-16.4292										66.0527	-29.585	3.39705
49.8862	-29.4207	-16.0436				54.635	-28.8768	17.8778	50.8068	-25.7112	-7.9894								69.6048	-21.0149	-14.3154										66.2896	-26.769	3.76445
51.3647	-26.677	-18.8459				60.7355	-26.0869	-2.1608	50.2202	-26.1237	-9.60225								68.8665	-22.2438	-15.5372										66.0621	-32.6436	2.76266
48.0247	-31.9469	-11.1319				62.5777	-24.665	-1.39192	51.28	-30.8831	-13.3476								61.6707	-20.3137	-12.8771										66.8319	-26.8995	7.48495
49.5324	-29.1618	-18.8372				56.0806	-24.1441	18.8624	49.9187	-40.5176	-1.46125								66.6505	-23.2874	-16.7568										67.4378	-23.3237	6.58872
54.6295	-27.4033	-14.197				56.0009	-24.2328	20.7496	52.4759	-27.6052	-7.94584								69.4843	-24.8947	-14.3783										64.784	-31.7767	5.25487
48.3512	-32.3816	-14.2608				55.2411	-27.8757	18.4359	47.7748	-33.5474	-7.95226								74.046	-21.9169	-2.91831										65.1595	-31.92	4.77655
56.9111	-25.3308	-11.7763				50.7601	-29.1686	10.5282	51.1275	-32.5667	-10.3143								68.826	-24.3884	-12.1499										69.178	-25.4821	4.80892
48.495	-27.9581	-17.0906				48.7491	-30.868	11.1405	48.3863	-37.312	-15.3704								67.0819	-21.3883	-18.625										67.1271	-31.0242	5.44644
49.5458	-27.2748	-18.4357				50.4142	-34.2646	19.0983	48.2118	-32.7466	-9.79712								68.9247	-24.9875	-14.3212										66.0469	-28.4949	-1.41555
49.9649	-27.8763	-19.268				52.8603	-29.3171	18.3744	53.9881	-23.3983	-4.58591								63.8729	-27.1048	-11.9537										68.3637	-26.9633	10.1669
50.1171	-34.3486	-16.4954				51.9396	-32.3951	20.7057	49.6689	-28.4139	-7.90483								65.7945	-25.5966	-12.123										66.7081	-28.9466	5.40735
48.5607	-29.2289	-15.2738				56.4573	-28.2183	18.4335	52.1182	-31.4715	-11.3751								62.4713	-22.68	-9.85272										66.4452	-32.0677	4.27287
52.8147	-27.6455	-17.7063				52.8247	-26.9647	20.1269	51.8642	-39.5145	-12.193								70.8999	-24.0268	-14.1248										67.8965	-26.6804	2.32939
58.9064	-21.3163	-4.39237				50.1746	-28.0237	18.7335	53.5777	-29.5373	-12.9329								59.5698	-25.2147	-12.1326										70.6935	-26.7798	-1.58128
52.8265	-26.2504	-17.7119				54.607	-26.9452	18.1996	44.6234	-18.4874	0.518517								68.5118	-24.5582	-11.3281										67.9141	-28.5225	1.73363
51.4189	-28.8224	-15.8776				55.3373	-26.1133	16.2323	53.7006	-30.0689	-11.2634								69.0623	-23.6715	-14.8324										68.4861	-27.568	2.52381
52.1714	-28.1744	-16.5122				47.1724	-33.1254	12.3425	50.6961	-29.0334	-7.98243								67.3935	-21.8102	-15.8785										68.4918	-27.822	3.97906
51.8104	-29.7977	-16.2611				52.7863	-30.0979	17.5186	48.3766	-32.8134	-11.735								64.9974	-24.2003	-13.681										67.3621	-24.744	4.70888
49.3294	-30.4619	-11.8519				51.8335	-29.3559	20.9269	51.3532	-31.6921	-11.7247								62.3364	-21.4782	-9.08898										67.3757	-32.0223	2.89584
50.2427	-26.5533	-11.5119				53.073	-27.9677	17.9034	53.1996	-24.5203	-6.18537								64.9644	-22.03	-11.8354										67.2785	-29.6412	7.17561
48.6985	-30.6831	-12.0884				55.1796	-25.6828	16.1775	52.0584	-24.7127	-8.0921								71.2969	-24.9685	-10.6231										68.5658	-26.3729	5.22837
50.261	-26.5057	-11.6185				52.3064	-28.835	11.2528	54.406	-29.0894	-7.33539								68.7487	-24.8941	-14.8821										71.1039	-25.3408	-0.16935
54.966	-23.3919	-4.40127				51.4706	-32.37	19.2216	55.1349	-16.355	-2.8034								61.3468	-21.9591	-8.21262										65.7458	-29.1135	5.9392
49.1974	-26.3705	-14.007				47.6717	-37.3121	16.6337	53.6827	-23.3025	-9.1119								68.9485	-24.0437	-18.4772										66.76	-29.3472	0.750167
48.3111	-27.7275	-11.0774				49.6055	-30.6428	19.408	50.281	-32.6605	-7.75377								63.5677	-23.4617	-10.5916										67.3983	-24.9738	2.19924
47.2141	-27.6128	-23.4197				56.626	-26.7559	18.9136	53.9273	-17.5637	-2.46738								67.5973	-23.5466	-6.85403										67.4154	-24.8171	-1.91661
47.3162	-32.4336	-18.2608				51.5139	-26.2252	8.12519	48.5846	-30.461	-8.38989								64.2067	-22.2484	-10.4314										70.8095	-28.2287	-0.685545
52.2349	-26.1647	-15.657				52.808	-28.9311	17.0435	54.0022	-26.4349	-10.9284								66.0953	-28.683	-11.9162										69.5126	-28.159	-1.07499
51.4232	-28.2277	-14.9189				52.4268	-28.7239	18.1982	55.4103	-22.6416	-0.13502								64.9411	-24.9367	-13.0462										67.555	-29.9586	4.33668
48.6236	-33.0565	-12.5928				52.2717	-31.6391	21.0415	51.9078	-37.5211	-0.424701								70.0389	-26.0816	-13.7978										65.8423	-30.4652	7.58733
48.9155	-28.9584	-16.8156				52.7441	-30.1504	18.218	51.9629	-29.8555	-12.6317								67.32	-25.7473	-13.7934										66.7145	-28.5103	5.46719
50.2449	-27.5562	-18.5189				51.9347	-26.1983	16.4519	46.5229	-14.657	-2.1737								66.5199	-23.4877	-14.3887										71.1571	-24.2864	5.21002
51.7693	-28.4328	-15.005				54.97	-28.0561	14.3375	54.4868	-25.2417	-4.93128								69.5879	-21.4543	-15.7818										68.7705	-29.0902	-1.32635
45.7401	-32.5155	-21.5186				46.7137	-34.4927	16.1804	49.8946	-27.0259	-7.22628								67.0682	-21.8063	-12.6372										70.7104	-23.6997	1.27905
55.1252	-25.3237	-3.07171				58.1823	-27.3313	21.2833	49.8269	-32.539	-6.81917								68.1505	-21.581	-16.9109										69.9391	-27.3934	-1.82957
48.7839	-32.4457	-12.0292				53.3635	-34.6901	16.4226	51.5882	-36.0272	-12.188								69.1311	-22.1498	-12.4543										69.9862	-29.4104	-1.94923
51.5603	-29.6304	-18.3624							52.2535	-31.614	-14.4991								64.8081	-25.5602	-14.9689										68.3262	-24.126	-2.73724
48.9732	-30.7555	-19.4271							49.3686	-29.5222	-9.48178								67.3042	-22.1195	-17.8909										68.2244	-32.0198	3.8856
48.4689	-34.8259	-13.8426							46.3182	-15.084	-2.15643								67.9886	-23.3274	-15.5936										67.1453	-32.6444	6.3566
48.0668	-26.7702	-11.9969							49.445	-37.5047	-2.02687								62.2583	-22.5684	-11.9105										67.9411	-23.0068	2.43076
52.6741	-26.9083	-17.8411							54.0145	-31.8829	-10.1453								68.2626	-22.073	-12.6748										70.306	-24.9351	5.34797
51.3448	-27.3323	-18.0417							53.9564	-38.2401	-10.7402								68.9895	-21.8998	-18.7748										67.4711	-31.1825	1.56708
51.6863	-27.6126	-18.8639							53.3236	-36.3178	-11.3944								59.5553	-22.5062	-13.0932										66.8684	-28.2788	3.89487
48.374	-31.7961	-13.1345							52.708	-35.7481	-11.4145								68.8403	-22.0958	-11.3553										69.0025	-30.1527	0.359976
56.5143	-25.2178	-13.6647							50.2466	-35.3521	-8.84033								63.2248	-22.9024	-9.57957										71.1463	-25.826	-0.273645
48.5681	-33.1008	-19.6194							52.328	-23.84	-6.14177								67.2495	-26.0957	-14.2188										66.8048	-28.4068	0.0596686
51.2069	-26.1189	-18.3459							51.065	-36.4625	-5.7701								69.857	-22.4388	-16.4292										67.2586	-33.0315	2.80992
47.5604	-32.5119	-21.1936							51.4453	-38.3841	-6.33797								69.749	-22.0011	-11.4507										66.3392	-31.5328	6.15862
50.2434	-29.0726	-15.5848							56.8574	-21.7689	-0.680343								69.6048	-21.0149	-14.3154										72.3242	-25.2917	0.918017
50.8439	-27.4207	-15.6711							53.377	-38.8791	-2.33002								68.8665	-22.2438	-15.5372										66.9158	-30.1179	8.86169
51.1097	-27.4188	-12.9625							51.5542	-31.2617	-14.2408								61.6707	-20.3137	-12.8771										68.1587	-24.7024	0.850108
49.2607	-29.0492	-10.4706							49.179	-29.5614	-8.05179								66.6505	-23.2874	-16.7568										68.5216	-25.9894	5.14782
48.5023	-36.2512	-19.8601							53.5995	-23.5718	-4.04514								69.4843	-24.8947	-14.3783										69.5901	-24.4926	-0.776124
47.4907	-32.8588	-14.8002							50.4886	-33.7929	-6.236								74.046	-21.9169	-2.91831										70.6775	-28.4434	-0.902882
49.2276	-30.2103	-11.4568							52.7974	-37.769	-3.12201								67.9314	-23.263	-12.2859										67.7187	-31.6171	0.269313
47.7339	-29.8174	-20.0343							51.9932	-31.6449	-4.18099								68.826	-24.3884	-12.1499										67.1467	-31.9916	1.50851
47.4417	-32.8811	-10.9674							52.5686	-29.8182	-12.5044								67.0819	-21.3883	-18.625										64.4305	-32.9882	6.1609
52.4597	-26.5964	-15.908							53.4505	-28.7797	-13.3031								68.9247	-24.9875	-14.3212										66.4777	-31.4165	3.68138
51.309	-25.4517	-16.2868							51.5203	-36.5093	-11.0485								63.8729	-27.1048	-11.9537										70.8128	-29.9859	1.12596
52.9051	-23.4317	-14.9905							52.3838	-23.9504	-5.01456								65.7945	-25.5966	-12.123										69.0363	-31.2214	2.40694
48.5784	-28.9815	-18.6824							53.1752	-32.6721	-8.72527								62.4713	-22.68	-9.85272										68.9509	-30.7487	-0.736645
49.9346	-32.1379	-20.8076							51.9487	-33.7744	-10.548								70.8999	-24.0268	-14.1248										70.8132	-28.8834	-1.86299
49.9161	-32.9589	-11.9542							47.935	-29.1576	-9.95128								59.5698	-25.2147	-12.1326										67.9749	-28.2205	-0.270971
48.0593	-32.7033	-14.3924							52.3674	-32.929	-13.7139								68.5118	-24.5582	-11.3281										64.6	-33.9825	4.89281
52.0566	-27.0038	-18.2826							52.2562	-38.1276	-2.90411								69.0623	-23.6715	-14.8324										68.7736	-29.2174	3.75242
52.7411	-26.5043	-15.5351							51.704	-37.3433	-11.3366								67.3935	-21.8102	-15.8785										64.1419	-31.6902	4.72166
49.5843	-30.2175	-20.344							51.8858	-35.1681	-10.8532								64.9974	-24.2003	-13.681										66.0211	-29.8104	3.47874
48.9893	-29.5867	-19.8689							51.8559	-32.1163	-5.49299								72.1084	-25.2752	-8.66412										69.6033	-29.3302	3.70294
53.5117	-28.8302	-19.4396							54.6219	-21.734	-5.32489								62.3364	-21.4782	-9.08898										71.2726	-26.0197	0.0376982
49.2592	-32.4927	-20.3996							49.6502	-38.5806	-7.45335								64.9644	-22.03	-11.8354										68.0444	-24.5355	2.74802
49.8836	-35.0473	-15.1304							52.1213	-37.0719	-10.9994								71.2969	-24.9685	-10.6231										62.7401	-22.244	6.11989
50.6123	-32.1538	-16.3676							51.7244	-31.3623	-15.167								72.4579	-20.9237	-7.03327										67.8031	-31.5221	2.31432
50.0508	-32.817	-13.427							49.9034	-27.662	-12.933								68.7487	-24.8941	-14.8821										67.7307	-27.0839	6.27349
49.2347	-27.6988	-11.7422							57.7099	-29.2735	-11.3284								61.3468	-21.9591	-8.21262										67.4137	-29.4197	5.94469
47.4552	-32.9344	-19.4173							54.0565	-28.0179	-9.96542								68.9485	-24.0437	-18.4772										70.4635	-29.2647	4.12427
51.9157	-26.5315	-15.3631							52.5644	-26.5843	-8.397								63.5677	-23.4617	-10.5916										68.2965	-33.0543	4.58119
50.3252	-29.347	-16.9246							48.1146	-36.4648	-6.75766								67.5973	-23.5466	-6.85403										68.4999	-31.1608	3.77772
52.767	-26.5105	-17.0383							51.506	-40.9222	-8.68871								64.2067	-22.2484	-10.4314										67.8473	-28.7465	3.11029
49.6092	-28.9929	-12.7822							54.0195	-28.0953	-13.4907								66.0953	-28.683	-11.9162										67.7145	-25.9103	-3.80354
50.22	-27.9252	-17.2788							49.8383	-37.8024	-13.6795								64.9411	-24.9367	-13.0462										66.6388	-33.0395	1.48123
49.0403	-33.2103	-19.5864							54.1337	-19.4431	-4.29386								70.0389	-26.0816	-13.7978										65.6838	-32.9613	7.3676
49.158	-29.5348	-12.7696							50.5006	-29.6583	-6.70651								67.32	-25.7473	-13.7934										67.5437	-29.3438	2.2412
51.335	-29.271	-17.6015							49.5786	-31.4241	-5.69866								66.5199	-23.4877	-14.3887										67.2939	-31.8285	4.73826
47.4774	-32.6041	-12.8981							50.1269	-30.3407	-5.89386								69.5879	-21.4543	-15.7818										68.312	-31.3723	2.76919
51.8573	-25.4557	-20.0783							48.5472	-35.5585	-10.8901								67.0682	-21.8063	-12.6372										67.1968	-30.3662	2.74713
52.3164	-26.7433	-17.0015							55.6869	-32.0666	-8.90852								68.1505	-21.581	-16.9109										68.9012	-31.4187	-3.51186
50.4766	-28.3019	-16.9049							47.6307	-33.3234	-9.50524								69.1311	-22.1498	-12.4543										65.9105	-32.2998	3.75011
55.2976	-25.7926	-16.0568							53.7229	-22.3877	-7.10462								64.8081	-25.5602	-14.9689										68.4112	-32.0479	0.708007
48.0916	-34.2644	-13.8372							50.8068	-25.7112	-7.9894								67.3042	-22.1195	-17.8909										68.5729	-29.5051	3.19778
49.539	-30.3895	-12.5976							50.2202	-26.1237	-9.60225								67.9886	-23.3274	-15.5936										66.4273	-32.9854	7.66031
48.9378	-32.3736	-15.2018							49.8067	-36.3896	-5.25232								62.2583	-22.5684	-11.9105										66.7618	-30.7648	-1.4407
55.0315	-27.9306	-16.3193							51.28	-30.8831	-13.3476								70.1272	-24.2514	-12.6928										64.7859	-31.8564	5.41891
49.8317	-29.9221	-17.1626							49.9187	-40.5176	-1.46125								68.2626	-22.073	-12.6748										66.0527	-29.585	3.39705
51.0908	-26.6015	-13.4502							52.4759	-27.6052	-7.94584								68.9895	-21.8998	-18.7748										66.2896	-26.769	3.76445
53.6919	-25.961	-17.261							47.7748	-33.5474	-7.95226								59.5553	-22.5062	-13.0932										66.0621	-32.6436	2.76266
50.883	-29.4469	-18.1168							51.1275	-32.5667	-10.3143								68.8403	-22.0958	-11.3553										66.8319	-26.8995	7.48495
48.711	-30.876	-21.6536							50.4229	-38.2098	-5.35816								63.2248	-22.9024	-9.57957										67.4378	-23.3237	6.58872
50.5949	-26.2853	-17.2699							48.3863	-37.312	-15.3704								67.2495	-26.0957	-14.2188										64.784	-31.7767	5.25487
52.557	-26.3794	-15.6126							48.2118	-32.7466	-9.79712								69.857	-22.4388	-16.4292										65.1595	-31.92	4.77655
48.081	-32.6848	-14.512							53.9881	-23.3983	-4.58591								69.749	-22.0011	-11.4507										69.178	-25.4821	4.80892
50.4604	-30.5974	-18.5508							49.6689	-28.4139	-7.90483								73.5654	-20.4196	-0.500885										67.1271	-31.0242	5.44644
49.6999	-30.1465	-18.1743							52.1182	-31.4715	-11.3751								69.6048	-21.0149	-14.3154										66.0469	-28.4949	-1.41555
61.3152	-22.4259	-6.22815							55.0247	-39.1569	-6.58328								68.8665	-22.2438	-15.5372										68.3637	-26.9633	10.1669
49.2754	-28.9682	-13.2964							51.8642	-39.5145	-12.193								61.6707	-20.3137	-12.8771										66.7081	-28.9466	5.40735
49.1383	-28.9006	-18.5149							53.5777	-29.5373	-12.9329								66.6505	-23.2874	-16.7568										66.4452	-32.0677	4.27287
51.1393	-27.5282	-17.4809							44.6234	-18.4874	0.518517								69.4843	-24.8947	-14.3783										67.8965	-26.6804	2.32939
48.3121	-33.0036	-10.7396							53.7006	-30.0689	-11.2634								74.046	-21.9169	-2.91831										70.6935	-26.7798	-1.58128
51.9974	-25.5381	-14.8793							50.6961	-29.0334	-7.98243								67.9314	-23.263	-12.2859										67.9141	-28.5225	1.73363
48.6859	-34.8538	-19.8697							50.9161	-32.5357	-3.60333								68.826	-24.3884	-12.1499										68.4861	-27.568	2.52381
48.3336	-32.6346	-14.1869							48.3766	-32.8134	-11.735								67.0819	-21.3883	-18.625										68.4918	-27.822	3.97906
49.5589	-28.5856	-18.7273							51.3532	-31.6921	-11.7247								68.9247	-24.9875	-14.3212										67.3621	-24.744	4.70888
50.3495	-28.1958	-13.266							50.6671	-30.1584	-5.93617								63.8729	-27.1048	-11.9537										67.3757	-32.0223	2.89584
48.6366	-30.0308	-15.2359							53.1996	-24.5203	-6.18537								65.7945	-25.5966	-12.123										67.2785	-29.6412	7.17561
50.8171	-26.518	-17.6911							48.7965	-40.8869	-6.5088								62.4713	-22.68	-9.85272										68.5658	-26.3729	5.22837
52.0679	-27.4518	-18.0964							52.0584	-24.7127	-8.0921								70.8999	-24.0268	-14.1248										71.1039	-25.3408	-0.16935
50.9745	-28.6456	-18.6928							57.952	-25.8018	-5.83139								74.5267	-26.4968	-9.26272										65.7458	-29.1135	5.9392
48.3201	-31.8225	-19.2924							54.406	-29.0894	-7.33539								59.5698	-25.2147	-12.1326										66.76	-29.3472	0.750167
48.914	-33.5757	-12.7966							55.1349	-16.355	-2.8034								68.5118	-24.5582	-11.3281										67.3983	-24.9738	2.19924
50.4496	-30.0804	-12.4897							53.6827	-23.3025	-9.1119								69.0623	-23.6715	-14.8324										67.4154	-24.8171	-1.91661
51.362	-27.5635	-18.2797							50.281	-32.6605	-7.75377								67.3935	-21.8102	-15.8785										70.8095	-28.2287	-0.685545
49.8862	-29.4207	-16.0436							53.9273	-17.5637	-2.46738								64.9974	-24.2003	-13.681										69.5126	-28.159	-1.07499
50.5172	-27.2052	-16.9073							48.5846	-30.461	-8.38989								72.1084	-25.2752	-8.66412										69.4034	-29.1227	-3.65959
51.3647	-26.677	-18.8459							54.0022	-26.4349	-10.9284								73.2015	-26.5358	-7.87356										67.555	-29.9586	4.33668
48.0247	-31.9469	-11.1319							55.4103	-22.6416	-0.13502								62.3364	-21.4782	-9.08898										65.8423	-30.4652	7.58733
49.5324	-29.1618	-18.8372							51.9078	-37.5211	-0.424701								64.9644	-22.03	-11.8354										66.7145	-28.5103	5.46719
54.6295	-27.4033	-14.197							51.9629	-29.8555	-12.6317								71.2969	-24.9685	-10.6231										71.1571	-24.2864	5.21002
48.3512	-32.3816	-14.2608							46.5229	-14.657	-2.1737								72.4579	-20.9237	-7.03327										68.7705	-29.0902	-1.32635
56.9111	-25.3308	-11.7763							54.4868	-25.2417	-4.93128								74.6811	-24.2692	-6.78374										70.7104	-23.6997	1.27905
48.495	-27.9581	-17.0906							49.8946	-27.0259	-7.22628								68.7487	-24.8941	-14.8821										69.9391	-27.3934	-1.82957
47.2406	-31.6601	-21.3886							49.8269	-32.539	-6.81917								69.3359	-25.3174	-15.42										69.9862	-29.4104	-1.94923
49.5458	-27.2748	-18.4357							52.5272	-25.1513	-8.36592								61.3468	-21.9591	-8.21262										68.3262	-24.126	-2.73724
49.9649	-27.8763	-19.268							51.5882	-36.0272	-12.188								68.6378	-24.3897	-14.1383										71.0016	-26.476	2.93897
50.1171	-34.3486	-16.4954							52.2535	-31.614	-14.4991								68.9485	-24.0437	-18.4772										68.2244	-32.0198	3.8856
47.9491	-29.8175	-18.8066							49.3686	-29.5222	-9.48178								68.517	-24.2742	-13.9535										67.1453	-32.6444	6.3566
48.5607	-29.2289	-15.2738							46.3182	-15.084	-2.15643																				67.9411	-23.0068	2.43076
52.8147	-27.6455	-17.7063							49.445	-37.5047	-2.02687																				70.306	-24.9351	5.34797
58.9064	-21.3163	-4.39237							54.0145	-31.8829	-10.1453																				67.4711	-31.1825	1.56708
57.5488	-22.3102	-6.45476							53.9564	-38.2401	-10.7402																				66.8684	-28.2788	3.89487
52.8265	-26.2504	-17.7119							49.0078	-32.2258	-5.98306																				69.0025	-30.1527	0.359976
51.4189	-28.8224	-15.8776							53.3236	-36.3178	-11.3944																				71.1463	-25.826	-0.273645
52.1714	-28.1744	-16.5122							52.708	-35.7481	-11.4145																				66.8048	-28.4068	0.0596686
51.8104	-29.7977	-16.2611							50.2466	-35.3521	-8.84033																				68.8488	-30.3872	-4.19151
49.3294	-30.4619	-11.8519							52.328	-23.84	-6.14177																				67.2586	-33.0315	2.80992
50.2427	-26.5533	-11.5119							51.065	-36.4625	-5.7701																				66.3392	-31.5328	6.15862
48.6985	-30.6831	-12.0884							51.4453	-38.3841	-6.33797																				72.3242	-25.2917	0.918017
50.261	-26.5057	-11.6185							56.8574	-21.7689	-0.680343																				66.9158	-30.1179	8.86169
54.966	-23.3919	-4.40127							52.9602	-24.3658	-5.75614																				68.1587	-24.7024	0.850108
49.8272	-30.3037	-12.7559							53.377	-38.8791	-2.33002																				68.5216	-25.9894	5.14782
49.1974	-26.3705	-14.007							51.5542	-31.2617	-14.2408																				69.5901	-24.4926	-0.776124
48.3111	-27.7275	-11.0774							49.179	-29.5614	-8.05179																				70.6775	-28.4434	-0.902882
47.2141	-27.6128	-23.4197							53.5995	-23.5718	-4.04514																				67.7187	-31.6171	0.269313
47.3162	-32.4336	-18.2608							50.4886	-33.7929	-6.236																				69.3133	-24.1666	-0.337928
52.2349	-26.1647	-15.657							52.7974	-37.769	-3.12201																				67.1467	-31.9916	1.50851
51.4232	-28.2277	-14.9189							51.9932	-31.6449	-4.18099																				64.4305	-32.9882	6.1609
48.6236	-33.0565	-12.5928							49.608	-28.0581	-8.29499																				66.4777	-31.4165	3.68138
48.9155	-28.9584	-16.8156							52.5686	-29.8182	-12.5044																				70.8128	-29.9859	1.12596
50.2449	-27.5562	-18.5189							53.4505	-28.7797	-13.3031																				69.0363	-31.2214	2.40694
49.7157	-30.0149	-16.2959							51.5203	-36.5093	-11.0485																				68.9509	-30.7487	-0.736645
51.7693	-28.4328	-15.005							52.3838	-23.9504	-5.01456																				70.8132	-28.8834	-1.86299
45.7401	-32.5155	-21.5186							53.1752	-32.6721	-8.72527																				67.9749	-28.2205	-0.270971
55.1252	-25.3237	-3.07171							51.9487	-33.7744	-10.548																				67.5207	-30.1283	-0.0197534
48.7839	-32.4457	-12.0292							47.935	-29.1576	-9.95128																				64.6	-33.9825	4.89281
51.5603	-29.6304	-18.3624							50.0675	-27.3588	-6.69022																				68.7736	-29.2174	3.75242
48.9732	-30.7555	-19.4271							52.3674	-32.929	-13.7139																				64.1419	-31.6902	4.72166
48.4689	-34.8259	-13.8426							52.2562	-38.1276	-2.90411																				66.0211	-29.8104	3.47874
48.0668	-26.7702	-11.9969							51.704	-37.3433	-11.3366																				69.6033	-29.3302	3.70294
52.6741	-26.9083	-17.8411							51.8858	-35.1681	-10.8532																				71.2726	-26.0197	0.0376982
58.2022	-31.6883	-11.0741							51.8559	-32.1163	-5.49299																				68.0444	-24.5355	2.74802
51.3448	-27.3323	-18.0417							54.6219	-21.734	-5.32489																				62.7401	-22.244	6.11989
51.6863	-27.6126	-18.8639							49.6502	-38.5806	-7.45335																				69.6795	-30.2275	-3.43611
48.374	-31.7961	-13.1345							47.5648	-33.2907	-7.13609																				67.8031	-31.5221	2.31432
56.5143	-25.2178	-13.6647							52.1213	-37.0719	-10.9994																				67.7307	-27.0839	6.27349
48.5681	-33.1008	-19.6194							51.7244	-31.3623	-15.167																				67.4137	-29.4197	5.94469
51.2069	-26.1189	-18.3459							49.9034	-27.662	-12.933																				70.4635	-29.2647	4.12427
47.5604	-32.5119	-21.1936							57.7099	-29.2735	-11.3284																				68.2965	-33.0543	4.58119
50.2434	-29.0726	-15.5848							54.0565	-28.0179	-9.96542																				68.4999	-31.1608	3.77772
50.8439	-27.4207	-15.6711							52.5644	-26.5843	-8.397																				67.8473	-28.7465	3.11029
48.3036	-34.7356	-22.2182							48.1146	-36.4648	-6.75766																				67.7145	-25.9103	-3.80354
51.1097	-27.4188	-12.9625							50.9618	-28.4243	-4.57602																				69.7686	-27.2593	0.400978
49.2607	-29.0492	-10.4706							51.506	-40.9222	-8.68871																				66.6388	-33.0395	1.48123
48.5023	-36.2512	-19.8601							54.0195	-28.0953	-13.4907																				65.6838	-32.9613	7.3676
47.4907	-32.8588	-14.8002							49.8383	-37.8024	-13.6795																				67.5437	-29.3438	2.2412
49.2276	-30.2103	-11.4568							54.1337	-19.4431	-4.29386																				67.2939	-31.8285	4.73826
47.7339	-29.8174	-20.0343							50.5006	-29.6583	-6.70651																				68.312	-31.3723	2.76919
47.4417	-32.8811	-10.9674							49.5786	-31.4241	-5.69866																				67.1968	-30.3662	2.74713
52.4597	-26.5964	-15.908							50.1269	-30.3407	-5.89386																				69.8642	-25.8774	-2.82039
51.309	-25.4517	-16.2868							51.314	-32.448	-4.44826																				68.9012	-31.4187	-3.51186
48.508	-30.2766	-18.4924							48.5472	-35.5585	-10.8901																				65.9105	-32.2998	3.75011
52.9051	-23.4317	-14.9905							55.6869	-32.0666	-8.90852																				68.4112	-32.0479	0.708007
48.5784	-28.9815	-18.6824							47.6307	-33.3234	-9.50524																				68.5729	-29.5051	3.19778
49.9346	-32.1379	-20.8076							53.7229	-22.3877	-7.10462																				66.4273	-32.9854	7.66031
49.9161	-32.9589	-11.9542							50.8068	-25.7112	-7.9894																				69.858	-30.4975	0.290187
48.0593	-32.7033	-14.3924							50.2202	-26.1237	-9.60225																				66.7618	-30.7648	-1.4407
52.0566	-27.0038	-18.2826							49.8067	-36.3896	-5.25232																				64.7859	-31.8564	5.41891
52.7411	-26.5043	-15.5351							50.8986	-33.5933	-5.12577																				66.0527	-29.585	3.39705
49.5843	-30.2175	-20.344							51.28	-30.8831	-13.3476																				66.2896	-26.769	3.76445
48.9893	-29.5867	-19.8689							49.9187	-40.5176	-1.46125																				66.0621	-32.6436	2.76266
49.3288	-29.8261	-15.1151							52.4759	-27.6052	-7.94584																				66.8319	-26.8995	7.48495
53.5117	-28.8302	-19.4396							47.7748	-33.5474	-7.95226																				67.4378	-23.3237	6.58872
49.2592	-32.4927	-20.3996							51.1275	-32.5667	-10.3143																				64.784	-31.7767	5.25487
49.8836	-35.0473	-15.1304							50.4229	-38.2098	-5.35816																				65.1595	-31.92	4.77655
50.6123	-32.1538	-16.3676							49.1548	-34.4182	-5.31337																				69.178	-25.4821	4.80892
50.0508	-32.817	-13.427							48.3863	-37.312	-15.3704																				67.1271	-31.0242	5.44644
49.2347	-27.6988	-11.7422							48.2118	-32.7466	-9.79712																				66.0469	-28.4949	-1.41555
47.4552	-32.9344	-19.4173							53.9881	-23.3983	-4.58591																				68.3637	-26.9633	10.1669
51.9157	-26.5315	-15.3631							49.6689	-28.4139	-7.90483																				66.7081	-28.9466	5.40735
50.3252	-29.347	-16.9246							52.1182	-31.4715	-11.3751																				66.4452	-32.0677	4.27287
48.7783	-28.5106	-13.1805							55.0247	-39.1569	-6.58328																				67.8965	-26.6804	2.32939
52.767	-26.5105	-17.0383							50.9504	-36.1003	-6.56754																				70.6935	-26.7798	-1.58128
49.6092	-28.9929	-12.7822							51.8642	-39.5145	-12.193																				67.9141	-28.5225	1.73363
50.22	-27.9252	-17.2788							53.5777	-29.5373	-12.9329																				68.4861	-27.568	2.52381
49.0403	-33.2103	-19.5864							44.6234	-18.4874	0.518517																				68.4918	-27.822	3.97906
49.158	-29.5348	-12.7696							53.7006	-30.0689	-11.2634																				67.3621	-24.744	4.70888
51.335	-29.271	-17.6015							50.6961	-29.0334	-7.98243																				67.3757	-32.0223	2.89584
47.4774	-32.6041	-12.8981							50.9161	-32.5357	-3.60333																				67.2785	-29.6412	7.17561
51.8573	-25.4557	-20.0783							52.6206	-36.5474	-4.62801																				68.5658	-26.3729	5.22837
52.3164	-26.7433	-17.0015							48.3766	-32.8134	-11.735																				71.1039	-25.3408	-0.16935
50.1692	-30.8722	-15.2532							51.3532	-31.6921	-11.7247																				65.7458	-29.1135	5.9392
50.4766	-28.3019	-16.9049							50.6671	-30.1584	-5.93617																				66.76	-29.3472	0.750167
55.2976	-25.7926	-16.0568							49.1854	-34.5026	-11.7689																				67.3983	-24.9738	2.19924
48.0916	-34.2644	-13.8372							53.1996	-24.5203	-6.18537																				67.4154	-24.8171	-1.91661
49.539	-30.3895	-12.5976							48.7965	-40.8869	-6.5088																				70.8095	-28.2287	-0.685545
48.9378	-32.3736	-15.2018							50.0313	-38.5563	-2.59716																				69.5126	-28.159	-1.07499
55.0315	-27.9306	-16.3193							52.0584	-24.7127	-8.0921																				69.4034	-29.1227	-3.65959
49.8317	-29.9221	-17.1626							57.952	-25.8018	-5.83139																				67.555	-29.9586	4.33668
51.0908	-26.6015	-13.4502							50.2931	-40.958	-5.7353																				65.8423	-30.4652	7.58733
53.6919	-25.961	-17.261							54.406	-29.0894	-7.33539																				66.7145	-28.5103	5.46719
49.711	-29.7208	-21.0988							55.1349	-16.355	-2.8034																				71.1571	-24.2864	5.21002
50.883	-29.4469	-18.1168							53.6827	-23.3025	-9.1119																				68.7705	-29.0902	-1.32635
48.711	-30.876	-21.6536							50.281	-32.6605	-7.75377																				70.7104	-23.6997	1.27905
50.5949	-26.2853	-17.2699							53.9273	-17.5637	-2.46738																				69.9391	-27.3934	-1.82957
52.557	-26.3794	-15.6126							48.5846	-30.461	-8.38989																				69.9862	-29.4104	-1.94923
48.081	-32.6848	-14.512							54.0022	-26.4349	-10.9284																				68.3262	-24.126	-2.73724
50.4604	-30.5974	-18.5508																													71.0016	-26.476	2.93897
49.6999	-30.1465	-18.1743																													68.2244	-32.0198	3.8856
61.3152	-22.4259	-6.22815																													67.1453	-32.6444	6.3566
49.2754	-28.9682	-13.2964																													67.9411	-23.0068	2.43076
52.5676	-25.4011	-19.482																													70.306	-24.9351	5.34797
49.1383	-28.9006	-18.5149																													67.4711	-31.1825	1.56708
51.1393	-27.5282	-17.4809																													66.8684	-28.2788	3.89487
48.3121	-33.0036	-10.7396																													69.0025	-30.1527	0.359976
51.9974	-25.5381	-14.8793																													71.1463	-25.826	-0.273645
48.6859	-34.8538	-19.8697																													66.8048	-28.4068	0.0596686
48.3336	-32.6346	-14.1869																													68.8488	-30.3872	-4.19151
49.5589	-28.5856	-18.7273																													67.2586	-33.0315	2.80992
50.3495	-28.1958	-13.266																													66.3392	-31.5328	6.15862
48.6366	-30.0308	-15.2359																													72.3242	-25.2917	0.918017
47.3009	-29.1635	-19.9654																													66.9158	-30.1179	8.86169
50.8171	-26.518	-17.6911																													68.1587	-24.7024	0.850108
52.0679	-27.4518	-18.0964																													68.5216	-25.9894	5.14782
50.9745	-28.6456	-18.6928																													69.5901	-24.4926	-0.776124
48.3201	-31.8225	-19.2924																													70.6775	-28.4434	-0.902882
48.914	-33.5757	-12.7966																													67.7187	-31.6171	0.269313
50.4496	-30.0804	-12.4897																													69.3133	-24.1666	-0.337928
51.362	-27.5635	-18.2797																													67.1467	-31.9916	1.50851
49.8862	-29.4207	-16.0436																													64.4305	-32.9882	6.1609
50.5172	-27.2052	-16.9073																													66.4777	-31.4165	3.68138
51.3647	-26.677	-18.8459																													70.8128	-29.9859	1.12596
48.0247	-31.9469	-11.1319																													69.0363	-31.2214	2.40694
49.5324	-29.1618	-18.8372																													68.9509	-30.7487	-0.736645
54.6295	-27.4033	-14.197																													70.8132	-28.8834	-1.86299
48.3512	-32.3816	-14.2608																													67.9749	-28.2205	-0.270971
56.9111	-25.3308	-11.7763																													67.5207	-30.1283	-0.0197534
48.495	-27.9581	-17.0906																													64.6	-33.9825	4.89281
47.2406	-31.6601	-21.3886																													68.7736	-29.2174	3.75242
49.5458	-27.2748	-18.4357																													64.1419	-31.6902	4.72166
49.9649	-27.8763	-19.268																													66.0211	-29.8104	3.47874
50.1171	-34.3486	-16.4954																													69.6033	-29.3302	3.70294
47.9491	-29.8175	-18.8066																													71.2726	-26.0197	0.0376982
48.5607	-29.2289	-15.2738																													68.0444	-24.5355	2.74802
52.8147	-27.6455	-17.7063																													62.7401	-22.244	6.11989
58.9064	-21.3163	-4.39237																													69.6795	-30.2275	-3.43611
57.5488	-22.3102	-6.45476																													67.8031	-31.5221	2.31432
																															67.7307	-27.0839	6.27349
																															67.4137	-29.4197	5.94469
																															70.4635	-29.2647	4.12427
																															68.2965	-33.0543	4.58119
																															68.4999	-31.1608	3.77772
																															67.8473	-28.7465	3.11029
																															67.7145	-25.9103	-3.80354
																															69.7686	-27.2593	0.400978
																															66.6388	-33.0395	1.48123
																															65.6838	-32.9613	7.3676
																															67.5437	-29.3438	2.2412
																															67.2939	-31.8285	4.73826
																															68.312	-31.3723	2.76919
																															67.1968	-30.3662	2.74713
																															69.8642	-25.8774	-2.82039
																															68.9012	-31.4187	-3.51186
																															65.9105	-32.2998	3.75011
																															68.4112	-32.0479	0.708007
																															68.5729	-29.5051	3.19778
																															66.4273	-32.9854	7.66031
																															69.858	-30.4975	0.290187
																															66.7618	-30.7648	-1.4407
																															64.7859	-31.8564	5.41891
																															66.0527	-29.585	3.39705
																															66.2896	-26.769	3.76445
																															66.0621	-32.6436	2.76266
																															66.8319	-26.8995	7.48495
																															67.4378	-23.3237	6.58872
																															64.784	-31.7767	5.25487
																															65.1595	-31.92	4.77655
																															69.178	-25.4821	4.80892
																															67.1271	-31.0242	5.44644
																															66.0469	-28.4949	-1.41555
																															68.3637	-26.9633	10.1669
																															66.7081	-28.9466	5.40735
																															66.4452	-32.0677	4.27287
																															67.8965	-26.6804	2.32939
																															70.6935	-26.7798	-1.58128
																															67.9141	-28.5225	1.73363
																															68.4861	-27.568	2.52381
																															68.4918	-27.822	3.97906
																															67.3621	-24.744	4.70888
																															66.9624	-29.2283	-3.52798
																															67.3757	-32.0223	2.89584
																															67.2785	-29.6412	7.17561
																															68.5658	-26.3729	5.22837
																															71.1039	-25.3408	-0.16935
																															65.7458	-29.1135	5.9392
																															66.76	-29.3472	0.750167
																															67.3983	-24.9738	2.19924
																															67.4154	-24.8171	-1.91661
																															70.8095	-28.2287	-0.685545
																															69.5126	-28.159	-1.07499
																															69.4034	-29.1227	-3.65959
																															66.3806	-28.626	-3.04532
																															67.555	-29.9586	4.33668
																															65.8423	-30.4652	7.58733
																															66.7145	-28.5103	5.46719
																															71.1571	-24.2864	5.21002
																															68.7705	-29.0902	-1.32635
																															70.7104	-23.6997	1.27905
																															69.9391	-27.3934	-1.82957
																															69.9862	-29.4104	-1.94923
																															68.3262	-24.126	-2.73724
																															71.0016	-26.476	2.93897
																															67.0078	-27.2049	-3.22856
																															68.2244	-32.0198	3.8856
																															67.1453	-32.6444	6.3566
																															67.9411	-23.0068	2.43076
																															70.306	-24.9351	5.34797
																															67.4711	-31.1825	1.56708
																															66.8684	-28.2788	3.89487
																															69.0025	-30.1527	0.359976
																															71.1463	-25.826	-0.273645
																															66.8048	-28.4068	0.0596686
																															68.8488	-30.3872	-4.19151
																															69.2976	-30.1443	0.285199
																															67.2586	-33.0315	2.80992
																															66.3392	-31.5328	6.15862
																															72.3242	-25.2917	0.918017
																															66.9158	-30.1179	8.86169
																															68.1587	-24.7024	0.850108
																															68.5216	-25.9894	5.14782
																															69.5901	-24.4926	-0.776124
																															70.6775	-28.4434	-0.902882
																															67.7187	-31.6171	0.269313
																															69.3133	-24.1666	-0.337928
																															70.3951	-24.6229	-1.03328
																															67.1467	-31.9916	1.50851
																															64.4305	-32.9882	6.1609
																															66.4777	-31.4165	3.68138
																															70.8128	-29.9859	1.12596
																															69.0363	-31.2214	2.40694
																															68.9509	-30.7487	-0.736645
																															70.8132	-28.8834	-1.86299
																															67.9749	-28.2205	-0.270971
																															67.5207	-30.1283	-0.0197534
																															68.526	-24.4014	-0.507245
																															64.6	-33.9825	4.89281
																															68.7736	-29.2174	3.75242
																															64.1419	-31.6902	4.72166
																															66.0211	-29.8104	3.47874
																															69.6033	-29.3302	3.70294
																															71.2726	-26.0197	0.0376982
																															68.0444	-24.5355	2.74802
																															62.7401	-22.244	6.11989
																															69.6795	-30.2275	-3.43611
																															67.6205	-26.3226	-2.84624
																															67.8031	-31.5221	2.31432
																															67.7307	-27.0839	6.27349
																															67.4137	-29.4197	5.94469
																															70.4635	-29.2647	4.12427
																															68.2965	-33.0543	4.58119
																															68.4999	-31.1608	3.77772
																															67.8473	-28.7465	3.11029
																															67.7145	-25.9103	-3.80354
																															69.7686	-27.2593	0.400978
																															68.7738	-28.3983	-1.56997
																															66.6388	-33.0395	1.48123
																															65.6838	-32.9613	7.3676
																															67.5437	-29.3438	2.2412
																															67.2939	-31.8285	4.73826
																															68.312	-31.3723	2.76919
																															67.1968	-30.3662	2.74713
																															69.8642	-25.8774	-2.82039
																															68.9012	-31.4187	-3.51186
																															65.9105	-32.2998	3.75011
																															68.4112	-32.0479	0.708007
																															68.5729	-29.5051	3.19778
																															66.4273	-32.9854	7.66031
																															69.858	-30.4975	0.290187
																															66.7618	-30.7648	-1.4407
																															64.7859	-31.8564	5.41891
																															66.0527	-29.585	3.39705
																															66.2896	-26.769	3.76445
																															66.0621	-32.6436	2.76266
																															66.8319	-26.8995	7.48495
																															67.4378	-23.3237	6.58872
																															64.784	-31.7767	5.25487
																															65.1595	-31.92	4.77655
																															69.178	-25.4821	4.80892
																															67.1271	-31.0242	5.44644
																															66.0469	-28.4949	-1.41555
																															68.3637	-26.9633	10.1669
																															66.7081	-28.9466	5.40735
																															66.4452	-32.0677	4.27287
																															67.8965	-26.6804	2.32939
																															70.6935	-26.7798	-1.58128
																															67.9141	-28.5225	1.73363
																															68.4861	-27.568	2.52381
																															68.4918	-27.822	3.97906
																															67.3621	-24.744	4.70888
																															66.9624	-29.2283	-3.52798
																															66.5401	-29.6769	-2.84349
																															67.3757	-32.0223	2.89584
																															67.2785	-29.6412	7.17561
																															68.5658	-26.3729	5.22837
																															71.1039	-25.3408	-0.16935
																															65.7458	-29.1135	5.9392
																															66.76	-29.3472	0.750167
																															67.3983	-24.9738	2.19924
																															67.4154	-24.8171	-1.91661
																															70.8095	-28.2287	-0.685545
																															69.5126	-28.159	-1.07499
																															69.4034	-29.1227	-3.65959
																															66.3806	-28.626	-3.04532
																															68.5452	-25.8203	-1.69236
																															67.555	-29.9586	4.33668
																															65.8423	-30.4652	7.58733
																															66.7145	-28.5103	5.46719
																															71.1571	-24.2864	5.21002
																															68.7705	-29.0902	-1.32635
																															70.7104	-23.6997	1.27905
																															69.9391	-27.3934	-1.82957
																															69.9862	-29.4104	-1.94923
																															68.3262	-24.126	-2.73724
																															71.0016	-26.476	2.93897
																															67.0078	-27.2049	-3.22856
																															67.1407	-25.4884	-8.3285
																															68.2244	-32.0198	3.8856
																															67.1453	-32.6444	6.3566
																															67.9411	-23.0068	2.43076
																															70.306	-24.9351	5.34797
																															67.4711	-31.1825	1.56708
																															66.8684	-28.2788	3.89487
																															69.0025	-30.1527	0.359976
																															71.1463	-25.826	-0.273645
																															66.8048	-28.4068	0.0596686
																															68.8488	-30.3872	-4.19151
																															69.2976	-30.1443	0.285199
																															68.9838	-22.6496	4.90259
																															67.2586	-33.0315	2.80992
																															66.3392	-31.5328	6.15862
																															72.3242	-25.2917	0.918017
																															66.9158	-30.1179	8.86169
																															68.1587	-24.7024	0.850108
																															68.5216	-25.9894	5.14782
																															69.5901	-24.4926	-0.776124
																															70.6775	-28.4434	-0.902882
																															67.7187	-31.6171	0.269313
																															69.3133	-24.1666	-0.337928
																															70.3951	-24.6229	-1.03328
																															67.3763	-21.5947	-6.91191
																															67.1467	-31.9916	1.50851
																															64.4305	-32.9882	6.1609
																															66.4777	-31.4165	3.68138
																															70.8128	-29.9859	1.12596
																															69.0363	-31.2214	2.40694
																															68.9509	-30.7487	-0.736645
																															70.8132	-28.8834	-1.86299
																															67.9749	-28.2205	-0.270971
																															67.5207	-30.1283	-0.0197534
																															68.526	-24.4014	-0.507245
																															69.1773	-25.0831	-0.889843
																															64.6	-33.9825	4.89281
																															68.7736	-29.2174	3.75242
																															64.1419	-31.6902	4.72166
																															66.0211	-29.8104	3.47874
																															69.6033	-29.3302	3.70294
																															71.2726	-26.0197	0.0376982
																															68.0444	-24.5355	2.74802
																															62.7401	-22.244	6.11989
																															69.6795	-30.2275	-3.43611
																															67.6205	-26.3226	-2.84624
																															65.7936	-27.4607	-4.11347
																															67.8031	-31.5221	2.31432
																															67.7307	-27.0839	6.27349
																															67.4137	-29.4197	5.94469
																															70.4635	-29.2647	4.12427
																															68.2965	-33.0543	4.58119
																															68.4999	-31.1608	3.77772
																															67.8473	-28.7465	3.11029
																															67.7145	-25.9103	-3.80354
																															69.7686	-27.2593	0.400978
																															68.7738	-28.3983	-1.56997
																															70.6316	-28.678	-1.86234
																															66.6388	-33.0395	1.48123
																															65.6838	-32.9613	7.3676
																															67.5437	-29.3438	2.2412
																															67.2939	-31.8285	4.73826
																															68.312	-31.3723	2.76919
																															67.1968	-30.3662	2.74713
																															69.8642	-25.8774	-2.82039
																															68.9012	-31.4187	-3.51186
																															65.9105	-32.2998	3.75011
																															68.4112	-32.0479	0.708007
																															68.5729	-29.5051	3.19778
																															66.4273	-32.9854	7.66031
																															69.858	-30.4975	0.290187
																															66.7618	-30.7648	-1.4407
																															64.7859	-31.8564	5.41891
																															66.0527	-29.585	3.39705
																															66.2896	-26.769	3.76445
																															66.0621	-32.6436	2.76266
																															66.8319	-26.8995	7.48495
																															67.4378	-23.3237	6.58872
																															64.784	-31.7767	5.25487
																															65.1595	-31.92	4.77655
																															69.178	-25.4821	4.80892
																															67.1271	-31.0242	5.44644
																															66.0469	-28.4949	-1.41555
																															68.3637	-26.9633	10.1669
																															66.7081	-28.9466	5.40735
																															66.4452	-32.0677	4.27287
																															67.8965	-26.6804	2.32939
																															70.6935	-26.7798	-1.58128
																															67.9141	-28.5225	1.73363
																															68.4861	-27.568	2.52381
																															68.4918	-27.822	3.97906
																															67.3621	-24.744	4.70888
																															66.9624	-29.2283	-3.52798
																															66.5401	-29.6769	-2.84349
																															67.3646	-27.4884	-2.87401
																															67.3757	-32.0223	2.89584
																															67.2785	-29.6412	7.17561
																															68.5658	-26.3729	5.22837
																															71.1039	-25.3408	-0.16935
																															65.7458	-29.1135	5.9392
																															66.76	-29.3472	0.750167
																															67.3983	-24.9738	2.19924
																															67.4154	-24.8171	-1.91661
																															70.8095	-28.2287	-0.685545
																															69.5126	-28.159	-1.07499
																															69.4034	-29.1227	-3.65959
																															66.3806	-28.626	-3.04532
																															68.5452	-25.8203	-1.69236
																															67.9892	-24.0908	-1.60583
																															67.555	-29.9586	4.33668
																															65.8423	-30.4652	7.58733
																															66.7145	-28.5103	5.46719
																															71.1571	-24.2864	5.21002
																															68.7705	-29.0902	-1.32635
																															70.7104	-23.6997	1.27905
																															69.9391	-27.3934	-1.82957
																															69.9862	-29.4104	-1.94923
																															68.3262	-24.126	-2.73724
																															71.0016	-26.476	2.93897
																															67.0078	-27.2049	-3.22856
																															67.1407	-25.4884	-8.3285
																															68.4368	-28.1737	-0.814628
																															68.2244	-32.0198	3.8856
																															67.1453	-32.6444	6.3566
																															67.9411	-23.0068	2.43076
																															70.306	-24.9351	5.34797
																															67.4711	-31.1825	1.56708
																															66.8684	-28.2788	3.89487
																															69.0025	-30.1527	0.359976
																															71.1463	-25.826	-0.273645
																															66.8048	-28.4068	0.0596686
																															68.8488	-30.3872	-4.19151
																															69.2976	-30.1443	0.285199
																															68.9838	-22.6496	4.90259
																															69.4777	-27.7196	-4.12826
																															67.2586	-33.0315	2.80992
																															66.3392	-31.5328	6.15862
																															72.3242	-25.2917	0.918017
																															66.9158	-30.1179	8.86169
																															68.1587	-24.7024	0.850108
																															68.5216	-25.9894	5.14782
																															69.5901	-24.4926	-0.776124
																															70.6775	-28.4434	-0.902882
																															67.7187	-31.6171	0.269313
																															69.3133	-24.1666	-0.337928
																															70.3951	-24.6229	-1.03328
																															67.3763	-21.5947	-6.91191
																															68.8078	-23.808	-1.93972
																															67.1467	-31.9916	1.50851
																															64.4305	-32.9882	6.1609
																															66.4777	-31.4165	3.68138
																															70.8128	-29.9859	1.12596
																															69.0363	-31.2214	2.40694
																															68.9509	-30.7487	-0.736645
																															70.8132	-28.8834	-1.86299
																															67.9749	-28.2205	-0.270971
																															67.5207	-30.1283	-0.0197534
																															68.526	-24.4014	-0.507245
																															69.1773	-25.0831	-0.889843
																															66.8597	-26.3822	-1.08845
																															64.6	-33.9825	4.89281
																															68.7736	-29.2174	3.75242
																															64.1419	-31.6902	4.72166
																															66.0211	-29.8104	3.47874
																															69.6033	-29.3302	3.70294
																															71.2726	-26.0197	0.0376982
																															68.0444	-24.5355	2.74802
																															62.7401	-22.244	6.11989
																															69.6795	-30.2275	-3.43611
																															67.6205	-26.3226	-2.84624
																															65.7936	-27.4607	-4.11347
																															67.0688	-31.5231	-1.6859
																															67.8031	-31.5221	2.31432
																															67.7307	-27.0839	6.27349
																															67.4137	-29.4197	5.94469
																															70.4635	-29.2647	4.12427
																															68.2965	-33.0543	4.58119
																															68.4999	-31.1608	3.77772
																															67.8473	-28.7465	3.11029
																															67.7145	-25.9103	-3.80354
																															69.7686	-27.2593	0.400978
																															68.7738	-28.3983	-1.56997
																															70.6316	-28.678	-1.86234
																															65.8576	-24.9493	-5.02355
																															66.6388	-33.0395	1.48123
																															65.6838	-32.9613	7.3676
																															67.5437	-29.3438	2.2412
																															67.2939	-31.8285	4.73826
																															68.312	-31.3723	2.76919
																															67.1968	-30.3662	2.74713
																															69.8642	-25.8774	-2.82039
																															64.814	-23.3199	-1.08328
																															68.9012	-31.4187	-3.51186
																															65.9105	-32.2998	3.75011
																															68.4112	-32.0479	0.708007
																															68.5729	-29.5051	3.19778
																															66.4273	-32.9854	7.66031
																															69.858	-30.4975	0.290187
																															67.5928	-26.4787	-4.83136
																															66.7618	-30.7648	-1.4407
																															64.7859	-31.8564	5.41891
																															66.0527	-29.585	3.39705
																															66.2896	-26.769	3.76445
																															66.0621	-32.6436	2.76266
																															66.8319	-26.8995	7.48495
																															67.4378	-23.3237	6.58872
																															64.784	-31.7767	5.25487
																															65.1595	-31.92	4.77655
																															69.178	-25.4821	4.80892
																															67.1271	-31.0242	5.44644
																															66.0469	-28.4949	-1.41555
																															68.3637	-26.9633	10.1669
																															66.7081	-28.9466	5.40735
																															66.4452	-32.0677	4.27287
																															67.8965	-26.6804	2.32939
																															70.6935	-26.7798	-1.58128
																															67.9141	-28.5225	1.73363
																															68.4861	-27.568	2.52381
																															68.4918	-27.822	3.97906
																															67.3621	-24.744	4.70888
																															66.9624	-29.2283	-3.52798
																															66.5401	-29.6769	-2.84349
																															67.3646	-27.4884	-2.87401
																															65.2482	-24.869	-2.30514
																															67.3757	-32.0223	2.89584
																															67.2785	-29.6412	7.17561
																															68.5658	-26.3729	5.22837
																															71.1039	-25.3408	-0.16935
																															65.7458	-29.1135	5.9392
																															66.76	-29.3472	0.750167
																															67.3983	-24.9738	2.19924
																															67.4154	-24.8171	-1.91661
																															70.8095	-28.2287	-0.685545
																															69.5126	-28.159	-1.07499
																															69.4034	-29.1227	-3.65959
																															66.3806	-28.626	-3.04532
																															68.5452	-25.8203	-1.69236
																															67.9892	-24.0908	-1.60583
																															68.4801	-25.3844	-2.47058
																															67.555	-29.9586	4.33668
																															65.8423	-30.4652	7.58733
																															66.7145	-28.5103	5.46719
																															71.1571	-24.2864	5.21002
																															68.7705	-29.0902	-1.32635
																															70.7104	-23.6997	1.27905
																															69.9391	-27.3934	-1.82957
																															69.9862	-29.4104	-1.94923
																															68.3262	-24.126	-2.73724
																															71.0016	-26.476	2.93897
																															67.0078	-27.2049	-3.22856
																															67.1407	-25.4884	-8.3285
																															68.4368	-28.1737	-0.814628
																															67.8833	-27.0689	-5.43353
																															68.2244	-32.0198	3.8856
																															67.1453	-32.6444	6.3566
																															67.9411	-23.0068	2.43076
																															70.306	-24.9351	5.34797
																															67.4711	-31.1825	1.56708
																															66.8684	-28.2788	3.89487
																															69.0025	-30.1527	0.359976
																															71.1463	-25.826	-0.273645
																															66.8048	-28.4068	0.0596686
																															68.8488	-30.3872	-4.19151
																															69.2976	-30.1443	0.285199
																															68.9838	-22.6496	4.90259
																															69.4777	-27.7196	-4.12826
																															68.5594	-31.0462	-5.40199
																															67.2586	-33.0315	2.80992
																															66.3392	-31.5328	6.15862
																															72.3242	-25.2917	0.918017
																															66.9158	-30.1179	8.86169
																															68.1587	-24.7024	0.850108
																															68.5216	-25.9894	5.14782
																															69.5901	-24.4926	-0.776124
																															70.6775	-28.4434	-0.902882
																															67.7187	-31.6171	0.269313
																															69.3133	-24.1666	-0.337928
																															70.3951	-24.6229	-1.03328
																															67.3763	-21.5947	-6.91191
																															68.8078	-23.808	-1.93972
																															70.1288	-26.3766	7.30594
																															67.1467	-31.9916	1.50851
																															64.4305	-32.9882	6.1609
																															66.4777	-31.4165	3.68138
																															70.8128	-29.9859	1.12596
																															69.0363	-31.2214	2.40694
																															68.9509	-30.7487	-0.736645
																															70.8132	-28.8834	-1.86299
																															67.9749	-28.2205	-0.270971
																															67.5207	-30.1283	-0.0197534
																															68.526	-24.4014	-0.507245
																															69.1773	-25.0831	-0.889843
																															66.8597	-26.3822	-1.08845
																															67.445	-25.7081	-1.23523
																															64.6	-33.9825	4.89281
																															68.7736	-29.2174	3.75242
																															64.1419	-31.6902	4.72166
																															66.0211	-29.8104	3.47874
																															69.6033	-29.3302	3.70294
																															71.2726	-26.0197	0.0376982
																															68.0444	-24.5355	2.74802
																															62.7401	-22.244	6.11989
																															69.6795	-30.2275	-3.43611
																															67.6205	-26.3226	-2.84624
																															65.7936	-27.4607	-4.11347
																															67.0688	-31.5231	-1.6859
																															71.9954	-24.8107	-2.70486
																															67.8031	-31.5221	2.31432
																															67.7307	-27.0839	6.27349
																															67.4137	-29.4197	5.94469
																															70.4635	-29.2647	4.12427
																															68.2965	-33.0543	4.58119
																															68.4999	-31.1608	3.77772
																															67.8473	-28.7465	3.11029
																															67.7145	-25.9103	-3.80354
																															69.7686	-27.2593	0.400978
																															68.7738	-28.3983	-1.56997
																															70.6316	-28.678	-1.86234
																															65.8576	-24.9493	-5.02355
																															65.1119	-25.937	-1.54815
																															66.6388	-33.0395	1.48123
																															65.6838	-32.9613	7.3676
																															67.5437	-29.3438	2.2412
																															67.2939	-31.8285	4.73826
																															68.312	-31.3723	2.76919
																															67.1968	-30.3662	2.74713
																															69.8642	-25.8774	-2.82039
																															64.814	-23.3199	-1.08328
																															68.9012	-31.4187	-3.51186
																															65.9105	-32.2998	3.75011
																															68.4112	-32.0479	0.708007
																															68.5729	-29.5051	3.19778
																															66.4273	-32.9854	7.66031
																															69.858	-30.4975	0.290187
																															67.5928	-26.4787	-4.83136
																															66.7618	-30.7648	-1.4407
																															64.7859	-31.8564	5.41891
																															66.0527	-29.585	3.39705
																															66.2896	-26.769	3.76445
																															66.0621	-32.6436	2.76266
																															66.8319	-26.8995	7.48495
																															67.4378	-23.3237	6.58872
																															64.784	-31.7767	5.25487
																															65.1595	-31.92	4.77655
																															69.178	-25.4821	4.80892
																															67.1271	-31.0242	5.44644
																															66.0469	-28.4949	-1.41555
