# Supplementary material for: 3D directional tuning in the orofacial sensorimotor cortex during natural feeding and drinking
Source: eLife. 2025 Oct 21;13:RP101325. doi: 10.7554/eLife.101325 (PMC12539803; doi:10.7554/eLife.101325)
Supplement: Figure 8—source data 3. [file elife-101325-fig8-data3.xlsx]

## Sheet: Sheet1
Figure 8 - Source Data 3
Figure 8C: Variation in the distance of drinking endpoints from mean endpoint
Summary Statistics
	Monkey R					Monkey Y
	Control	Nerve Block		Sham		Control	Nerve Block
mean	4.82919	6.47586		4.7792		4.0882	4.21705
median	4.06351	5.64552		3.53306		3.77019	3.94231
std	3.27552	3.22271		4.18767		1.93497	2.02804
	t-test	f-test		t-test		t-test	f-test
p-value	2.86533e-40	0.54222		0.679401		0.0488704	0.0441581
Source Data
Monkey R					Monkey Y
Control	Nerve Block		Sham		Control	Nerve Block
4.20615	12.4736		3.92089		4.13114	4.85243
3.68656	6.19497		1.88487		4.28625	8.09413
1.83983	6.26503		4.17683		1.98925	3.08421
2.95675	10.2917		1.91643		3.83462	2.57746
3.58266	4.1213		6.91595		2.43866	3.57363
6.38718	5.48838		4.30579		4.13114	5.33182
4.65743	6.58159		0.843129		6.31843	1.64992
3.74647	9.98031		1.04428		4.28625	4.85243
1.31978	5.9927		3.92089		1.66328	7.11757
2.20106	4.71296		3.50001		1.98925	8.09413
2.86895	9.81581		1.88487		6.22775	4.21664
3.23858	9.27794		1.35099		3.83462	3.08421
3.95929	12.4736		4.17683		3.3553	2.57746
4.20615	10.5348		3.08516		2.43866	3.57363
1.07891	6.19497		1.91643		5.85591	5.33182
3.68656	5.92003		1.04929		7.55483	1.64992
5.54319	6.26503		6.91595		6.33183	4.85243
1.83983	5.64552		2.97039		4.13114	7.11757
7.96668	10.2917		4.30579		6.31843	4.34408
2.95675	5.60154		4.77304		3.92592	8.09413
3.5459	4.1213		0.843129		4.28625	4.21664
3.58266	5.44115		0.699866		1.66328	4.91064
5.62854	5.48838		1.04428		4.39528	3.08421
6.38718	9.21953		3.92089		1.98925	3.15232
3.28918	6.58159		3.50001		6.22775	2.57746
4.65743	6.53193		2.84573		7.32786	3.7784
5.61764	9.98031		1.88487		3.83462	3.57363
3.74647	6.09895		1.35099		3.3553	3.68575
3.30367	5.9927		2.96053		6.00708	5.33182
1.31978	4.20486		4.17683		2.43866	3.49769
5.96531	4.71296		3.08516		5.85591	1.64992
2.20106	12.096		4.48759		2.89918	7.26411
6.15588	9.81581		1.91643		7.55483	4.85243
2.86895	4.04302		1.04929		6.33183	7.11757
2.38643	9.27794		0.742954		4.13114	4.34408
3.23858	4.90603		6.91595		6.31843	5.19817
3.22194	12.4736		2.97039		3.92592	8.09413
3.95929	10.5348		2.0745		5.48909	4.21664
6.04689	4.14086		4.30579		4.28625	4.91064
3.26857	6.19497		4.77304		1.66328	3.08421
1.99331	5.92003		1.0753		4.39528	3.15232
4.20615	2.80817		0.843129		2.69259	2.57746
1.07891	6.26503		0.699866		1.98925	3.7784
3.68656	5.64552		0.568068		6.22775	6.02537
5.54319	4.62909		1.04428		7.32786	3.57363
1.83983	10.2917		3.35765		2.96843	3.68575
7.96668	5.60154		3.92089		3.83462	4.18277
2.95675	2.88747		3.50001		3.3553	5.33182
3.5459	4.1213		2.84573		6.00708	3.49769
3.58266	5.44115		1.88487		2.43866	2.55202
5.62854	6.06277		1.35099		5.85591	1.64992
6.38718	5.48838		2.96053		2.89918	7.26411
3.28918	9.21953		4.17683		4.89891	7.43459
4.65743	6.94202		3.08516		7.55483	4.85243
5.61764	6.58159		4.48759		2.72749	7.11757
3.74647	6.53193		1.91643		6.33183	4.34408
3.30367	5.66955		1.04929		4.13114	5.19817
1.31978	9.98031		0.742954		6.31843	8.09413
5.96531	6.09895		6.91595		3.92592	4.21664
2.20106	8.69579		2.97039		5.48909	4.91064
6.15588	5.9927		2.0745		2.45018	3.08421
2.86895	4.20486		4.30579		4.28625	3.15232
2.38643	4.74347		4.77304		1.66328	2.57746
3.23858	4.71296		1.0753		4.39528	3.7784
3.22194	12.096		0.843129		2.69259	6.02537
3.95929	9.81581		0.699866		3.5006	3.57363
6.04689	4.04302		0.568068		1.98925	3.68575
3.26857	9.27794		1.04428		6.22775	4.18277
1.99331	4.90603		3.35765		7.32786	5.33182
4.20615	12.4736		3.92089		2.96843	3.49769
1.07891	10.5348		3.50001		5.07851	2.55202
2.11172	4.14086		2.84573		3.83462	1.64992
3.68656	6.19497		2.91905		3.3553	7.26411
5.54319	5.92003		1.88487		6.00708	7.43459
8.27042	2.80817		1.35099		3.63883	4.85243
1.83983	6.26503		2.96053		2.43866	7.11757
7.96668	5.64552		1.02303		5.85591	4.34408
14.2773	4.62909		4.17683		2.89918	5.19817
2.95675	10.2917		3.08516		4.89891	8.09413
3.5459	5.60154		4.48759		2.64435	4.21664
4.33952	2.88747		5.73336		7.55483	4.91064
3.58266	4.1213		1.91643		2.72749	10.3941
5.62854	5.44115		1.04929		2.82572	3.08421
8.24756	6.06277		0.742954		6.33183	3.15232
6.38718	5.48838		1.65385		4.13114	5.09061
3.28918	9.21953		6.91595		6.31843	2.57746
5.65953	6.94202		2.97039		3.92592	3.7784
4.65743	6.58159		2.0745		5.48909	6.02537
5.61764	6.53193		1.10162		2.45018	8.0695
5.89735	5.66955		4.30579		4.28625	3.57363
3.74647	9.98031		4.77304		1.66328	3.68575
3.30367	6.09895		1.0753		4.39528	4.18277
1.86118	8.69579		4.78849		2.69259	1.89731
1.31978	5.9927		0.843129		3.5006	5.33182
5.96531	4.20486		0.699866		1.98925	3.49769
5.94179	4.74347		0.568068		6.22775	2.55202
2.20106	4.71296		3.69749		7.32786	2.64942
6.15588	12.096		1.04428		2.96843	1.64992
3.22706	9.81581		3.35765		5.07851	7.26411
2.86895	4.04302		3.7355		3.83462	7.43459
2.38643	9.27794		4.29725		3.3553	10.1263
6.78711	4.90603		3.92089		6.00708	6.00203
3.23858	12.4736		3.50001		3.63883	11.5029
3.22194	10.5348		2.84573		2.43866	2.36155
2.83566	4.14086		2.91905		5.85591	5.90587
3.95929	6.19497		1.88487		2.89918	4.85243
6.04689	5.92003		1.35099		4.89891	7.11757
3.00086	2.80817		2.96053		2.64435	4.34408
3.26857	6.26503		1.02303		5.49488	5.19817
3.59356	5.64552		4.17683		7.55483	6.27812
1.99331	4.62909		3.08516		2.72749	8.09413
3.3514	10.2917		4.48759		2.82572	4.21664
4.20615	5.60154		5.73336		3.21987	4.91064
1.07891	2.88747		1.91643		6.33183	10.3941
2.11172	4.1213		1.04929		2.63881	5.10381
1.52046	5.44115		0.742954		3.0109	3.08421
3.68656	6.06277		1.65385		7.49733	3.15232
5.54319	5.48838		6.91595		5.79548	5.09061
8.27042	9.21953		2.97039		4.13114	3.15356
5.01328	6.94202		2.0745		6.31843	2.57746
1.83983	6.58159		1.10162		3.92592	3.7784
7.96668	6.53193		4.30579		5.48909	6.02537
14.2773	5.66955		4.77304		2.45018	8.0695
5.34442	9.98031		1.0753		4.24847	3.57363
2.95675	6.09895		4.78849		4.28625	3.68575
3.5459	8.69579		0.843129		1.66328	4.18277
4.33952	5.9927		0.699866		4.39528	1.89731
7.6506	4.20486		0.568068		2.69259	5.33182
3.58266	4.74347		3.69749		3.5006	3.49769
5.62854	4.71296		1.04428		4.95362	2.55202
8.24756	12.096		3.35765		1.98925	2.64942
4.80884	9.81581		3.7355		6.22775	1.64992
6.38718	4.04302		4.29725		7.32786	7.26411
3.28918	9.27794		3.92089		2.96843	7.43459
5.65953	4.90603		3.50001		5.07851	10.1263
5.50261	12.4736		2.84573		2.95884	6.00203
4.65743	10.5348		2.91905		3.83462	11.5029
5.61764	4.14086		3.21056		3.3553	2.36155
5.89735	18.2586		1.88487		6.00708	5.90587
2.95015	6.19497		1.35099		3.63883	4.85243
3.74647	5.92003		2.96053		3.30333	7.11757
3.30367	2.80817		1.02303		2.43866	4.34408
1.86118	17.9448		2.11111		5.85591	5.19817
5.54708	6.26503		4.17683		2.89918	6.27812
1.31978	5.64552		3.08516		4.89891	8.09413
5.96531	4.62909		4.48759		2.64435	4.21664
5.94179	7.56347		5.73336		5.49488	4.91064
3.67667	10.2917		4.33089		4.24015	10.3941
2.20106	5.60154		1.91643		7.55483	5.10381
6.15588	2.88747		1.04929		2.72749	2.4635
3.22706	8.90814		0.742954		2.82572	3.08421
3.58146	4.1213		1.65385		3.21987	3.15232
2.86895	5.44115		1.75788		2.08488	5.09061
2.38643	6.06277		6.91595		6.33183	3.15356
6.78711	7.91536		2.97039		2.63881	4.41035
4.16386	5.48838		2.0745		5.35949	2.57746
3.23858	9.21953		1.10162		3.0109	3.7784
3.22194	6.94202		3.76264		7.49733	6.02537
2.83566	4.77176		4.30579		5.79548	8.0695
4.70563	6.58159		4.77304		4.13114	5.39902
3.95929	6.53193		1.0753		6.31843	3.57363
6.04689	5.66955		4.78849		3.92592	3.68575
3.00086	6.83882		1.27636		5.48909	4.18277
3.26857	9.98031		0.843129		2.45018	1.89731
3.59356	6.09895		0.699866		4.24847	7.7734
1.99331	8.69579		0.568068		4.28625	5.33182
3.3514	12.5465		3.69749		1.66328	3.49769
4.20615	5.9927		3.67652		4.39528	2.55202
1.07891	4.20486		1.04428		2.69259	2.64942
2.11172	4.74347		3.35765		3.5006	2.84058
1.52046	8.93871		3.7355		4.95362	1.64992
4.43819	4.71296		4.29725		1.98925	7.26411
3.68656	12.096		3.92089		6.22775	7.43459
5.54319	3.51108		3.50001		7.32786	10.1263
8.27042	9.81581		2.84573		2.96843	6.6073
5.01328	4.04302		2.91905		5.07851	6.00203
3.57784	8.88415		3.21056		2.95884	4.16827
1.83983	9.27794		1.01623		3.83462	11.5029
7.96668	4.90603		1.88487		3.3553	8.06627
14.2773	16.9841		1.35099		6.00708	2.36155
5.34442	4.86762		2.96053		3.63883	5.90587
2.67307	7.05273		1.02303		3.30333	4.85243
2.95675	6.26874		2.11111		2.43866	7.11757
3.5459	3.57688		1.96914		5.85591	4.34408
4.33952	16.0987		4.17683		2.89918	5.19817
7.6506	7.92142		3.08516		4.89891	6.27812
5.6288	2.36804		4.48759		2.64435	2.5128
3.58266	14.9141		5.73336		5.49488	8.09413
5.62854	3.10725		4.33089		4.24015	4.21664
8.24756	5.57517		1.89957		7.55483	4.91064
4.80884	12.4736		1.91643		2.72749	10.3941
4.77398	10.5348		1.04929		2.82572	5.10381
6.38718	4.14086		0.742954		3.21987	2.4635
3.28918	18.2586		1.65385		2.08488	6.03601
5.65953	6.19497		1.75788		6.33183	3.08421
5.50261	5.92003		6.26977		2.63881	3.15232
4.48663	2.80817		6.91595		5.35949	5.09061
4.65743	17.9448		2.97039		3.0109	3.15356
5.61764	6.26503		2.0745		7.49733	4.41035
5.89735	5.64552		1.10162		5.79548	2.57746
2.95015	4.62909		3.76264		4.13114	3.7784
4.41044	7.56347		3.74127		6.31843	6.02537
3.74647	10.2917		4.30579		3.92592	8.0695
3.30367	5.60154		4.77304		5.48909	5.39902
1.86118	2.88747		1.0753		2.45018	3.9251
5.54708	8.90814		4.78849		4.24847	3.57363
3.45933	4.1213		1.27636		2.50917	3.68575
1.31978	5.44115		2.34706		4.28625	4.18277
5.96531	6.06277		0.843129		1.66328	1.89731
5.94179	7.91536		0.699866		4.39528	7.7734
3.67667	5.48838		0.568068		2.69259	5.33182
3.55795	9.21953		3.69749		3.5006	3.49769
2.20106	6.94202		3.67652		4.95362	2.55202
6.15588	4.77176		4.2393		2.72839	2.64942
3.22706	6.58159		1.04428		1.98925	2.84058
3.58146	6.53193		3.35765		6.22775	1.64992
4.41996	5.66955		3.7355		7.32786	7.26411
2.86895	6.83882		21.8623		2.96843	7.43459
2.38643	9.98031		4.29725		5.07851	10.1263
6.78711	6.09895		2.81439		2.95884	6.6073
4.16386	8.69579		3.92089		4.57916	6.00203
7.05483	12.5465		3.50001		3.83462	4.16827
3.23858	5.9927		2.84573		3.3553	11.5029
3.22194	4.20486		2.91905		6.00708	8.06627
2.83566	4.74347		3.21056		3.63883	2.36155
4.70563	8.93871		1.01623		3.30333	5.90587
5.5873	4.71296		2.67832		12.5834	4.85243
3.95929	12.096		1.88487		2.43866	7.11757
6.04689	3.51108		1.35099		5.85591	4.34408
3.00086	9.81581		2.96053		2.89918	5.19817
4.91692	4.04302		1.02303		4.89891	6.27812
3.26857	8.88415		2.11111		2.64435	2.5128
3.59356	9.27794		1.96914		5.49488	1.52008
5.14862	4.90603		1.53583		4.24015	8.09413
1.99331	16.9841		4.17683		7.55483	4.21664
3.3514	4.86762		3.08516		2.72749	4.91064
16.3935	7.05273		4.48759		2.82572	10.3941
4.20615	6.26874		5.73336		3.21987	5.10381
1.07891	3.57688		4.33089		2.08488	2.4635
2.11172	16.0987		1.89957		6.33183	6.03601
1.52046	7.92142		17.1136		2.63881	7.81379
4.43819	2.36804		1.91643		5.35949	3.08421
3.68656	14.9141		1.04929		3.0109	3.15232
5.54319	3.10725		0.742954		7.49733	5.09061
8.27042	5.57517		1.65385		5.79548	3.15356
5.01328	12.4736		1.75788		4.13114	4.41035
3.57784	10.5348		6.26977		6.31843	0.686558
1.83983	4.14086		1.89932		3.92592	2.57746
7.96668	18.2586		6.91595		5.48909	3.7784
14.2773	7.37641		2.97039		2.45018	6.02537
5.34442	6.19497		2.0745		4.24847	8.0695
2.67307	5.92003		1.10162		2.50917	5.39902
2.95675	2.80817		3.76264		4.28625	3.9251
3.5459	17.9448		3.74127		1.66328	7.83665
4.33952	9.57821		0.926457		4.39528	3.57363
7.6506	6.26503		4.30579		2.69259	3.68575
5.6288	5.64552		4.77304		3.5006	4.18277
3.58266	4.62909		1.0753		4.95362	1.89731
5.62854	7.56347		4.78849		2.72839	7.7734
8.24756	6.25211		1.27636		1.98925	3.68691
4.80884	10.2917		2.34706		6.22775	5.33182
4.77398	5.60154		1.26858		7.32786	3.49769
6.38718	2.88747		0.843129		2.96843	2.55202
3.28918	8.90814		0.699866		5.07851	2.64942
5.65953	3.90877		0.568068		2.95884	2.84058
5.50261	4.1213		3.69749		4.57916	3.64883
4.48663	5.44115		3.67652		3.83462	1.64992
4.65743	6.06277		4.2393		3.3553	7.26411
5.61764	7.91536		2.0772		6.00708	7.43459
5.89735	2.31145		1.04428		3.63883	10.1263
2.95015	5.48838		3.35765		3.30333	6.6073
4.41044	9.21953		3.7355		12.5834	2.54445
3.74647	6.94202		21.8623		2.43866	6.00203
3.30367	4.77176		9.98929		5.85591	4.16827
1.86118	3.3738		4.29725		2.89918	1.81179
5.54708	6.58159		2.81439		4.89891	11.5029
3.45933	6.53193		14.865		2.64435	8.06627
1.31978	5.66955		3.92089		5.49488	1.20932
5.96531	6.83882		3.50001		4.24015	2.36155
5.94179	4.01399		2.84573		7.55483	5.90587
3.67667	9.98031		2.91905		2.72749	2.95
3.55795	6.09895		3.21056		2.82572	1.82457
2.20106	8.69579		1.01623		3.21987	3.16915
6.15588	12.5465		2.67832		2.08488	3.9623
3.22706	2.59407		1.88487		6.33183	3.20041
3.58146	5.9927		1.35099		2.63881	6.20102
4.41996	4.20486		2.96053		5.35949	2.45759
2.86895	4.74347		1.02303		3.0109	4.28336
2.38643	8.93871		2.11111		7.49733	6.76322
6.78711	5.33899		1.96914		5.79548	4.60805
4.16386	4.71296		1.53583		4.13114	7.75302
7.05483	12.096		4.17683		6.31843	2.95
3.23858	3.51108		3.08516		3.92592	4.49523
3.22194	4.71531		4.48759		5.48909	1.82457
2.83566	9.81581		5.73336		2.45018	5.38953
4.70563	4.04302		4.33089		4.24847	3.16915
5.5873	8.88415		1.89957		2.50917	5.10056
3.95929	3.2936		17.1136		4.28625	3.9623
6.04689	9.27794		1.91643		1.66328	4.43001
3.00086	4.90603		1.04929		4.39528	3.20041
4.91692	16.9841		0.742954		2.69259	6.1568
3.26857	3.4397		1.65385		3.5006	6.20102
3.59356	4.86762		1.75788		4.95362	1.43709
5.14862	3.1789		6.26977		2.72839	2.45759
1.99331	7.05273		1.89932		1.98925	4.07007
3.3514	6.26874		6.91595		6.22775	4.28336
16.3935	3.57688		2.97039		7.32786	6.37449
4.20615	16.0987		2.0745		2.96843	6.76322
1.07891	7.92142		1.10162		5.07851	3.83066
2.11172	2.36804		3.76264		2.95884	4.60805
1.52046	14.9141		3.74127		4.57916	4.86018
4.43819	3.10725		0.926457		3.83462	3.92833
5.20945	5.57517		4.30579		3.3553	6.95064
3.68656	12.4736		4.77304		6.00708	4.34306
5.54319	10.5348		1.0753		3.63883	7.75302
8.27042	4.14086		4.78849		3.30333	2.8728
5.01328	18.2586		1.27636		12.5834	2.95
3.57784	7.37641		2.34706		2.43866	4.49523
1.76678	6.19497		1.26858		5.85591	3.78038
1.83983	5.92003		0.843129		2.89918	1.82457
7.96668	2.80817		0.699866		4.89891	5.38953
14.2773	17.9448		0.568068		2.64435	2.98134
5.34442	9.57821		3.69749		5.49488	3.16915
2.67307	6.26503		3.67652		4.24015	5.10056
4.04326	5.64552		4.2393		7.55483	6.10551
2.95675	4.62909		2.0772		2.72749	3.9623
3.5459	7.56347		1.04428		2.82572	4.43001
4.33952	6.25211		3.35765		3.21987	6.21729
7.6506	10.2917		3.7355		2.08488	3.20041
5.6288	5.60154		21.8623		6.33183	6.1568
3.99382	2.88747		9.98929		2.63881	2.80943
3.58266	8.90814		4.29725		5.35949	6.20102
5.62854	3.90877		2.81439		3.0109	1.43709
8.24756	4.1213		14.865		7.49733	4.87125
4.80884	5.44115		3.92089		5.79548	2.45759
4.77398	6.06277		3.50001		4.13114	4.07007
4.90705	7.91536		2.84573		6.31843	3.24006
6.38718	2.31145		2.91905		3.92592	4.28336
3.28918	5.48838		3.21056		5.48909	6.37449
5.65953	9.21953		1.01623		2.45018	0.594733
5.50261	6.94202		2.67832		4.24847	6.76322
4.48663	4.77176		22.1112		2.50917	3.83066
3.60118	3.3738		1.88487		4.28625	3.63688
4.65743	6.58159		1.35099		1.66328	4.60805
5.61764	6.53193		2.96053		4.39528	4.86018
5.89735	5.66955		1.02303		2.69259	1.8935
2.95015	6.83882		2.11111		3.5006	3.92833
4.41044	4.01399		1.96914		4.95362	5.31389
4.65731	9.98031		1.53583		2.72839	6.95064
3.74647	6.09895		3.14856		1.98925	4.72732
3.30367	8.69579		4.17683		6.22775	4.34306
1.86118	12.5465		3.08516		7.32786	4.40391
5.54708	2.59407		4.48759		2.96843	3.38048
3.45933	5.9927		5.73336		5.07851	4.53518
1.86412	4.20486		4.33089		2.95884	7.75302
1.31978	4.74347		1.89957		4.57916	2.8728
5.96531	8.93871		17.1136		3.83462	3.58895
5.94179	5.33899		1.19298		3.3553	2.95
3.67667	4.71296		1.91643		6.00708	4.49523
3.55795	12.096		1.04929		3.63883	3.78038
4.79836	3.51108		0.742954		3.30333	5.81186
2.20106	4.71531		1.65385		12.5834	1.82457
6.15588	9.81581		1.75788		2.43866	5.38953
3.22706	4.04302		6.26977		5.85591	2.98134
3.58146	8.88415		1.89932		2.89918	3.16915
4.41996	3.2936		3.46636		4.89891	5.10056
2.91473	9.27794		6.91595		2.64435	6.10551
2.86895	4.90603		2.97039		5.49488	3.9623
2.38643	16.9841		2.0745		4.24015	4.43001
6.78711	3.4397		1.10162		7.55483	6.21729
4.16386	4.86762		3.76264		2.72749	3.20041
7.05483	3.1789		3.74127		2.82572	6.1568
4.37344	7.05273		0.926457		3.21987	2.80943
3.23858	6.26874		2.25258		2.08488	6.20102
3.22194	3.57688		4.30579		6.33183	1.43709
2.83566	16.0987		4.77304		2.63881	4.87125
4.70563	7.92142		1.0753		5.35949	2.01918
5.5873	2.36804		4.78849		3.0109	2.45759
3.58501	14.9141		1.27636		7.49733	4.07007
3.95929	3.10725		2.34706		5.79548	3.24006
6.04689	5.57517		1.26858		4.13114	3.04105
3.00086	12.4736		3.84514		6.31843	4.28336
4.91692	10.5348		0.843129		3.92592	6.37449
4.13987	4.14086		0.699866		5.48909	0.594733
3.26857	18.2586		0.568068		2.45018	3.41322
3.59356	7.37641		3.69749		4.24847	6.76322
5.14862	6.19497		3.67652		2.50917	3.83066
1.99331	5.92003		4.2393		4.28625	3.63688
3.3514	2.80817		2.0772		1.66328	4.60805
16.3935	17.9448		1.45017		4.39528	4.86018
4.20615	9.57821		1.04428		2.69259	1.8935
1.07891	6.26503		3.35765		3.5006	3.92833
2.11172	5.64552		3.7355		4.95362	5.31389
1.52046	4.62909		21.8623		2.72839	6.95064
4.43819	7.56347		9.98929		1.98925	4.72732
5.20945	6.25211		1.54313		6.22775	4.34306
4.49201	10.2917		4.29725		7.32786	4.40391
3.68656	5.60154		2.81439		2.96843	3.38048
5.54319	2.88747		14.865		5.07851	4.53518
8.27042	8.90814		2.51298		2.95884	7.75302
5.01328	3.90877		20.9263		4.57916	2.8728
3.57784	4.1213		3.92089		3.83462	3.58895
1.76678	5.44115		3.50001		3.3553	2.45958
5.41111	6.06277		2.84573		6.00708	2.95
1.83983	7.91536		2.91905		3.63883	4.49523
7.96668	2.31145		3.21056		3.30333	3.78038
14.2773	5.48838		1.01623		12.5834	5.81186
5.34442	9.21953		2.67832		2.43866	3.78193
2.67307	6.94202		22.1112		5.85591	1.82457
4.04326	4.77176		4.96437		2.89918	5.38953
6.29482	3.3738		1.88487		4.89891	2.98134
2.95675	6.58159		1.35099		2.64435	6.38953
3.5459	6.53193		2.96053		5.49488	3.16915
4.33952	5.66955		1.02303		4.24015	5.10056
7.6506	6.83882		2.11111		7.55483	6.10551
5.6288	4.01399		1.96914		2.72749	5.53573
3.99382	9.98031		1.53583		2.82572	3.9623
6.79678	6.09895		3.14856		3.21987	4.43001
3.58266	8.69579		3.16314		2.08488	6.21729
5.62854	12.5465		4.17683		6.33183	6.2637
8.24756	2.59407		3.08516		2.63881	3.20041
4.80884	5.9927		4.48759		5.35949	6.1568
4.77398	4.20486		5.73336		3.0109	2.80943
4.90705	4.74347		4.33089		7.49733	3.56314
6.87483	8.93871		1.89957		5.79548	6.20102
6.38718	5.33899		17.1136		4.13114	1.43709
3.28918	4.71296		1.19298		6.31843	4.87125
5.65953	12.096		15.7307		3.92592	2.01918
5.50261	3.51108		1.91643		5.48909	2.09154
4.48663	4.71531		1.04929		2.45018	2.45759
3.60118	9.81581		0.742954		4.24847	4.07007
3.60683	4.04302		1.65385		2.50917	3.24006
4.65743	8.88415		1.75788		4.28625	3.04105
5.61764	3.2936		6.26977		1.66328	4.39343
5.89735	9.27794		1.89932		4.39528	4.28336
2.95015	4.90603		3.46636		2.69259	6.37449
4.41044	16.9841		2.31643		3.5006	0.594733
4.65731	3.4397		6.91595		4.95362	3.41322
5.86252	4.86762		2.97039		2.72839	2.33649
3.74647	3.1789		2.0745		1.98925	6.76322
3.30367	7.05273		1.10162		6.22775	3.83066
1.86118	6.26874		3.76264		7.32786	3.63688
5.54708	3.57688		3.74127		2.96843	1.01584
3.45933	16.0987		0.926457		5.07851	4.60805
1.86412	7.92142		2.25258		2.95884	4.86018
5.43193	2.36804		3.0349		4.57916	1.8935
1.31978	14.9141		4.30579		3.83462	3.92833
5.96531	3.10725		4.77304		3.3553	5.31389
5.94179	5.57517		1.0753		6.00708	6.95064
3.67667	12.4736		4.78849		3.63883	4.72732
3.55795	10.5348		1.27636		3.30333	4.34306
4.79836	4.14086		2.34706		12.5834	4.40391
1.49618	18.2586		1.26858		2.43866	3.38048
2.20106	7.37641		3.84514		5.85591	4.53518
6.15588	4.51942		2.27623		2.89918	7.75302
3.22706	6.19497		0.843129		4.89891	2.8728
3.58146	5.92003		0.699866		2.64435	3.58895
4.41996	2.80817		0.568068		5.49488	2.45958
2.91473	17.9448		3.69749		4.24015	2.95
2.48996	9.57821		3.67652		7.55483	4.49523
2.86895	2.9572		4.2393		2.72749	3.78038
2.38643	6.26503		2.0772		2.82572	5.81186
6.78711	5.64552		1.45017		3.21987	3.78193
4.16386	4.62909		5.21907		2.08488	1.82457
7.05483	7.56347		1.04428		6.33183	5.38953
4.37344	6.25211		3.35765		2.63881	2.98134
2.95947	7.79439		3.7355		5.35949	6.38953
3.23858	10.2917		21.8623		3.0109	3.16915
3.22194	5.60154		9.98929		7.49733	5.10056
2.83566	2.88747		1.54313		5.79548	6.10551
4.70563	8.90814		5.62363		4.13114	5.53573
5.5873	3.90877		4.29725		6.31843	3.9623
3.58501	8.85866		2.81439		3.92592	4.43001
2.99805	4.1213		14.865		5.48909	6.21729
3.95929	5.44115		2.51298		2.45018	6.2637
6.04689	6.06277		4.60573		4.24847	3.20041
3.00086	7.91536		20.9263		2.50917	6.1568
4.91692	2.31145		2.14562		4.28625	2.80943
4.13987	3.42299		3.92089		1.66328	3.56314
8.65512	5.48838		3.50001		4.39528	6.20102
3.26857	9.21953		2.84573		2.69259	1.43709
3.59356	6.94202		2.91905		3.5006	4.87125
5.14862	4.77176		3.21056		4.95362	2.01918
1.99331	3.3738		1.01623		2.72839	2.09154
3.3514	10.2335		2.67832		1.98925	2.45759
16.3935	6.58159		22.1112		6.22775	4.07007
4.20615	6.53193		4.96437		7.32786	3.24006
1.07891	5.66955		1.88487		2.96843	3.04105
2.11172	6.83882		1.35099		5.07851	4.39343
1.52046	4.01399		2.96053		2.95884	4.28336
4.43819	4.46198		1.02303		4.57916	6.37449
5.20945	9.98031		2.11111		3.83462	0.594733
4.49201	6.09895		1.96914		3.3553	3.41322
5.14297	8.69579		1.53583		6.00708	2.33649
3.68656	12.5465		3.14856		3.63883	6.76322
5.54319	2.59407		3.16314		3.30333	3.83066
8.27042	3.63305		4.17683		12.5834	3.63688
5.01328	5.9927		3.08516		2.43866	1.01584
3.57784	4.20486		4.48759		5.85591	4.60805
1.76678	4.74347		5.73336		2.89918	4.86018
5.41111	8.93871		4.33089		4.89891	1.8935
1.75233	5.33899		1.89957		2.64435	3.92833
1.83983	5.11453		17.1136		5.49488	5.31389
7.96668	4.71296		1.19298		4.24015	6.95064
14.2773	12.096		15.7307		7.55483	4.72732
5.34442	3.51108		1.91643		2.72749	4.34306
2.67307	4.71531		1.04929		2.82572	4.40391
4.04326	2.38246		0.742954		3.21987	3.38048
6.29482	9.81581		1.65385		2.08488	4.53518
5.24082	4.04302		1.75788		6.33183	7.75302
2.95675	8.88415		6.26977		2.63881	2.8728
3.5459	3.2936		1.89932		5.35949	3.58895
4.33952	2.81715		3.46636		3.0109	2.45958
7.6506	9.27794		2.31643		7.49733	2.95
5.6288	4.90603		6.91595		5.79548	4.49523
3.99382	16.9841		2.97039		4.13114	3.78038
6.79678	3.4397		2.0745		6.31843	5.81186
0.460076	2.23324		1.10162		3.92592	3.78193
3.58266	4.86762		3.76264		5.48909	1.82457
5.62854	3.1789		3.74127		2.45018	5.38953
8.24756	7.05273		0.926457		4.24847	2.98134
4.80884	6.26874		2.25258		2.50917	6.38953
4.77398	3.57688		3.0349		4.28625	3.16915
4.90705	16.0987		4.30579		1.66328	5.10056
6.87483	7.92142		4.77304		4.39528	6.10551
3.33212	2.36804		1.0753		2.69259	5.53573
6.38718	14.9141		4.78849		3.5006	3.9623
3.28918	3.10725		1.27636		4.95362	4.43001
5.65953	5.57517		2.34706		2.72839	6.21729
5.50261	12.4736		1.26858		1.98925	6.2637
4.48663	10.5348		3.84514		6.22775	3.20041
3.60118	4.14086		2.27623		7.32786	6.1568
3.60683	18.2586		0.843129		2.96843	2.80943
4.55766	7.37641		0.699866		5.07851	3.56314
4.65743	4.51942		0.568068		2.95884	6.20102
5.61764	6.19497		3.69749		4.57916	1.43709
5.89735	5.92003		3.67652		3.83462	4.87125
2.95015	2.80817		4.2393		3.3553	2.01918
4.41044	17.9448		2.0772		6.00708	2.09154
4.65731	9.57821		1.45017		3.63883	2.45759
5.86252	2.9572		5.21907		3.30333	4.07007
3.14688	6.26503		1.04428		12.5834	3.24006
3.74647	5.64552		3.35765		2.43866	3.04105
3.30367	4.62909		3.7355		5.85591	4.39343
1.86118	7.56347		21.8623		2.89918	4.28336
5.54708	6.25211		9.98929		4.89891	6.37449
3.45933	7.79439		1.54313		2.64435	0.594733
1.86412	10.2917		5.62363		5.49488	3.41322
5.43193	5.60154		4.29725		4.24015	2.33649
5.76038	2.88747		2.81439		7.55483	6.76322
1.31978	8.90814		14.865		2.72749	3.83066
5.96531	3.90877		2.51298		2.82572	3.63688
5.94179	8.85866		4.60573		3.21987	1.01584
3.67667	4.1213		20.9263		2.08488	4.60805
3.55795	5.44115		2.14562		6.33183	4.86018
4.79836	6.06277		3.92089		2.63881	1.8935
1.49618	7.91536		3.50001		5.35949	3.92833
3.70792	2.31145		2.84573		3.0109	5.31389
2.20106	3.42299		2.91905		7.49733	6.95064
6.15588	5.48838		3.21056		5.79548	4.72732
3.22706	9.21953		1.01623		4.13114	4.34306
3.58146	6.94202		2.67832		6.31843	4.40391
4.41996	4.77176		22.1112		3.92592	3.38048
2.91473	3.3738		4.96437		5.48909	4.53518
2.48996	10.2335		2.2396		2.45018	7.75302
16.1215	6.58159		1.88487		4.24847	2.8728
2.86895	6.53193		1.35099		2.50917	3.58895
2.38643	5.66955		2.96053		4.28625	2.45958
6.78711	6.83882		1.02303		1.66328	5.71453
4.16386	4.01399		2.11111		4.39528	2.95
7.05483	4.46198		1.96914		2.69259	4.49523
4.37344	9.98031		1.53583		3.5006	3.78038
2.95947	6.09895		3.14856		4.95362	5.81186
2.90177	8.69579		3.16314		2.72839	3.78193
3.23858	12.5465		1.2106		1.98925	2.24011
3.22194	2.59407		4.17683		6.22775	1.82457
2.83566	3.63305		3.08516		7.32786	5.38953
4.70563	5.9927		4.48759		2.96843	2.98134
5.5873	4.20486		5.73336		5.07851	6.38953
3.58501	4.74347		4.33089		2.95884	4.18882
2.99805	8.93871		1.89957		4.57916	3.16915
0.575791	5.33899		17.1136		3.83462	5.10056
3.95929	5.11453		1.19298		3.3553	6.10551
6.04689	4.71296		15.7307		6.00708	5.53573
3.00086	12.096		2.85222		3.63883	2.40552
4.91692	3.51108		1.91643		3.30333	3.9623
4.13987	4.71531		1.04929		12.5834	4.43001
8.65512	2.38246		0.742954		2.43866	6.21729
2.57157	9.81581		1.65385		5.85591	6.2637
3.26857	4.04302		1.75788		2.89918	4.80425
3.59356	8.88415		6.26977		4.89891	3.20041
5.14862	3.2936		1.89932		2.64435	6.1568
1.99331	2.81715		3.46636		5.49488	2.80943
3.3514	9.27794		2.31643		4.24015	3.56314
16.3935	4.90603		4.12845		7.55483	2.49568
4.20615	16.9841		6.91595		2.72749	6.20102
1.07891	3.4397		2.97039		2.82572	1.43709
2.11172	2.23324		2.0745		3.21987	4.87125
1.52046	4.86762		1.10162		2.08488	2.01918
4.43819	3.1789		3.76264		6.33183	2.09154
5.20945	7.05273		3.74127		2.63881	5.39692
4.49201	6.26874		0.926457		5.35949	2.45759
5.14297	3.57688		2.25258		3.0109	4.07007
13.736	16.0987		3.0349		7.49733	3.24006
3.68656	7.92142		2.36486		5.79548	3.04105
5.54319	2.36804		4.30579		4.13114	4.39343
8.27042	14.9141		4.77304		6.31843	2.42152
5.01328	3.10725		1.0753		3.92592	4.28336
3.57784	5.57517		4.78849		5.48909	6.37449
1.76678	12.4736		1.27636		2.45018	0.594733
5.41111	10.5348		2.34706		4.24847	3.41322
1.75233	4.14086		1.26858		2.50917	2.33649
3.05484	18.2586		3.84514		1.30734	1.38466
1.83983	7.37641		2.27623		4.28625	6.76322
7.96668	4.51942		4.26601		1.66328	3.83066
14.2773	3.03234		0.843129		4.39528	3.63688
5.34442	6.19497		0.699866		2.69259	1.01584
2.67307	5.92003		0.568068		3.5006	6.40938
4.04326	2.80817		3.69749		4.95362	4.60805
6.29482	17.9448		3.67652		2.72839	4.86018
5.24082	9.57821		4.2393		4.79969	1.8935
3.73547	2.9572		2.0772		1.98925	2.94267
2.95675	7.93557		1.45017		6.22775	3.92833
3.5459	6.26503		5.21907		7.32786	5.31389
4.33952	5.64552		1.0521		2.96843	6.95064
7.6506	4.62909		1.04428		5.07851	4.72732
5.6288	7.56347		3.35765		2.95884	4.34306
3.99382	6.25211		3.7355		4.57916	4.40391
6.79678	7.79439		21.8623		3.63486	3.38048
0.460076	13.223		9.98929		3.83462	4.53518
1.88687	10.2917		1.54313		3.3553	7.75302
3.58266	5.60154		5.62363		6.00708	2.8728
5.62854	2.88747		4.06867		3.63883	3.58895
8.24756	8.90814		4.29725		3.30333	2.45958
4.80884	3.90877		2.81439		12.5834	5.71453
4.77398	8.85866		14.865		1.38784	1.17041
4.90705	4.53635		2.51298		2.43866	2.95
6.87483	4.1213		4.60573		5.85591	4.49523
3.33212	5.44115		8.45809		2.89918	3.78038
3.89818	6.06277		20.9263		4.89891	5.81186
6.38718	7.91536		2.14562		2.64435	3.78193
3.28918	2.31145		2.05602		5.49488	2.24011
5.65953	3.42299		3.92089		4.24015	4.17901
5.50261	4.31676		3.50001		7.55483	1.82457
4.48663	5.48838		2.84573		2.72749	5.38953
3.60118	9.21953		2.91905		2.82572	2.98134
3.60683	6.94202		3.21056		3.21987	6.38953
4.55766	4.77176		1.01623		2.08488	4.18882
4.16677	3.3738		2.67832		7.16477	6.32558
4.65743	10.2335		22.1112		6.33183	3.16915
5.61764	7.98355		4.96437		2.63881	5.10056
5.89735	6.58159		2.2396		5.35949	6.10551
2.95015	6.53193		4.30476		8.64775	5.53573
4.41044	5.66955		1.88487		3.0109	2.40552
4.65731	6.83882		1.35099		7.49733	1.67642
5.86252	4.01399		2.96053		5.79548	3.9623
3.14688	4.46198		1.02303		4.13114	4.43001
0.962665	6.82055		2.11111		6.31843	6.21729
3.74647	9.98031		1.96914		3.92592	6.2637
3.30367	6.09895		1.53583		5.48909	4.80425
1.86118	8.69579		3.14856		2.45018	4.00844
5.54708	12.5465		3.16314		4.24847	3.20041
3.45933	2.59407		1.2106		2.50917	6.1568
1.86412	3.63305		1.38237		1.30734	2.80943
5.43193	3.202		4.17683		4.28625	3.56314
5.76038	5.9927		3.08516		1.66328	2.49568
3.29224	4.20486		4.48759		4.39528	4.02588
1.31978	4.74347		5.73336		2.69259	6.20102
5.96531	8.93871		4.33089		3.5006	1.43709
5.94179	5.33899		1.89957		4.95362	4.87125
3.67667	5.11453		17.1136		2.72839	2.01918
3.55795	6.67661		1.19298		4.79969	2.09154
4.79836	4.71296		15.7307		3.43689	5.39692
1.49618	12.096		2.85222		1.98925	4.57517
3.70792	3.51108		0.54197		6.22775	2.45759
4.80014	4.71531		1.91643		7.32786	4.07007
2.20106	2.38246		1.04929		2.96843	3.24006
6.15588	8.07014		0.742954		5.07851	3.04105
3.22706	9.81581		1.65385		2.95884	4.39343
3.58146	4.04302		1.75788		4.57916	2.42152
4.41996	8.88415		6.26977		3.63486	0.521108
2.91473	3.2936		1.89932		14.6097	4.28336
2.48996	2.81715		3.46636		3.83462	6.37449
16.1215	9.11981		2.31643		3.3553	0.594733
2.9269	9.27794		4.12845		6.00708	3.41322
2.86895	4.90603		2.04768		3.63883	2.33649
2.38643	16.9841		6.91595		3.30333	1.38466
6.78711	3.4397		2.97039		12.5834	6.76322
4.16386	2.23324		2.0745		1.38784	3.83066
7.05483	5.34085		1.10162		2.43866	3.63688
4.37344	4.86762		3.76264		5.85591	1.01584
2.95947	3.1789		3.74127		2.89918	6.40938
2.90177	2.98794		0.926457		4.89891	4.60805
2.09332	7.05273		2.25258		2.64435	4.86018
3.23858	10.5626		3.0349		5.49488	1.8935
3.22194	6.26874		2.36486		4.24015	2.94267
2.83566	8.61221		3.52059		9.15706	3.92833
4.70563	3.57688		4.30579		7.55483	5.31389
5.5873	16.0987		4.77304		2.72749	6.95064
3.58501	7.92142		1.0753		2.82572	4.72732
2.99805	2.36804		4.78849		3.21987	4.34306
0.575791	14.9141		1.27636		2.08488	4.40391
2.23684	3.10725		2.34706		7.16477	3.38048
3.95929	5.57517		1.26858		8.83809	4.53518
6.04689	12.4736		3.84514		6.33183	7.75302
3.00086	10.5348		2.27623		2.63881	2.8728
4.91692	4.14086		4.26601		5.35949	3.58895
4.13987	18.2586		1.71055		8.64775	2.45958
8.65512	7.37641		0.843129		10.1297	5.71453
2.57157	4.51942		0.699866		3.0109	1.17041
6.73429	3.03234		0.568068		3.91226	1.71016
3.26857	5.86553		3.69749		7.49733	2.95
3.59356	6.19497		3.67652		2.30563	4.49523
5.14862	5.92003		4.2393		5.79548	3.78038
3.80833	2.80817		2.0772		2.08155	5.81186
1.99331	17.9448		1.45017		4.8531	3.78193
3.3514	9.57821		5.21907		4.98144	2.24011
16.3935	2.9572		1.0521		4.15249	4.17901
13.7585	7.93557		4.08648		4.8531	6.33667
4.20615	3.96221		1.04428		4.98144	1.82457
1.07891	6.26503		3.35765		4.15249	5.38953
2.11172	5.64552		3.7355		4.8531	2.98134
1.52046	4.62909		21.8623		2.49983	6.38953
4.43819	7.56347		9.98929		4.98144	4.18882
5.20945	6.25211		1.54313		3.33488	6.32558
4.49201	7.79439		5.62363		4.15249	5.34173
5.14297	13.223		4.06867		2.27849	3.16915
13.736	7.30488		3.7465		4.8531	5.10056
3.4431	10.2917		4.29725		2.49983	6.10551
3.68656	5.60154		2.81439		4.33299	5.53573
5.54319	2.88747		14.865		4.98144	2.40552
8.27042	8.90814		2.51298		3.33488	1.67642
5.01328	3.90877		4.60573		3.29476	2.88185
3.57784	8.85866		8.45809		4.15249	3.9623
1.76678	4.53635		5.95878		2.27849	4.43001
5.41111	3.54815		20.9263		4.37293	6.21729
1.75233	4.1213		2.14562		5.10695	6.2637
3.05484	5.44115		2.05602		2.65455	4.80425
1.10299	6.06277		0.880276		7.21845	4.00844
1.83983	7.91536		3.92089		4.8531	6.07832
7.96668	2.31145		3.50001		2.49983	3.20041
14.2773	3.42299		2.84573		4.33299	6.1568
5.34442	4.31676		2.91905		4.98144	2.80943
2.67307	4.37786		3.21056		3.33488	3.56314
4.04326	5.48838		1.01623		3.29476	2.49568
6.29482	9.21953		2.67832		4.15249	4.02588
5.24082	6.94202		22.1112		2.27849	6.20102
3.73547	4.77176		4.96437		4.37293	1.43709
9.51178	3.3738		2.2396		5.10695	4.87125
2.95675	10.2335		4.30476		2.65455	2.01918
3.5459	7.98355		1.88487		7.21845	2.09154
4.33952	4.94321		1.35099		4.8531	5.39692
7.6506	6.58159		2.96053		2.49983	4.57517
5.6288	6.53193		1.02303		4.33299	2.45759
3.99382	5.66955		2.11111		1.54511	4.07007
6.79678	6.83882		1.96914		4.98144	3.24006
0.460076	4.01399		1.53583		3.33488	3.04105
1.88687	4.46198		3.14856		3.29476	4.39343
8.58769	6.82055		3.16314		3.87277	2.42152
3.58266	4.83703		1.2106		4.15249	0.521108
5.62854	9.98031		1.38237		2.27849	4.28336
8.24756	6.09895		4.17683		4.37293	6.37449
4.80884	8.69579		3.08516		4.78045	0.594733
4.77398	12.5465		4.48759		5.10695	3.41322
4.90705	2.59407		5.73336		11.6846	2.33649
6.87483	3.63305		4.33089		2.65455	1.38466
3.33212	3.202		1.89957		2.29475	6.76322
3.89818	4.4744		17.1136		7.21845	3.83066
3.33309	5.9927		1.19298		4.8531	3.63688
6.38718	4.20486		15.7307		2.49983	1.01584
3.28918	4.74347		2.85222		4.33299	6.40938
5.65953	8.93871		0.54197		1.54511	4.60805
5.50261	5.33899		1.91643		5.21195	4.86018
4.48663	5.11453		1.04929		4.98144	1.8935
3.60118	6.67661		0.742954		3.33488	2.94267
3.60683	4.4713		1.65385		3.29476	3.92833
4.55766	4.71296		1.75788		3.87277	5.31389
4.16677	12.096		6.26977		1.57205	6.95064
1.51388	3.51108		1.89932		4.15249	4.72732
4.65743	4.71531		3.46636		2.27849	4.34306
5.61764	2.38246		2.31643		4.37293	4.40391
5.89735	8.07014		4.12845		4.78045	3.38048
2.95015	5.4219		2.04768		1.98801	4.53518
4.41044	9.81581		6.91595		5.10695	7.75302
4.65731	4.04302		2.97039		11.6846	2.8728
5.86252	8.88415		2.0745		2.18264	3.58895
3.14688	3.2936		1.10162		2.65455	2.45958
0.962665	2.81715		3.76264		2.29475	5.71453
3.32366	9.11981		3.74127		4.29319	1.17041
3.74647	5.6046		0.926457		7.21845	1.71016
3.30367	9.27794		2.25258		3.49169	1.92599
1.86118	4.90603		3.0349		4.8531	2.95
5.54708	16.9841		2.36486		2.49983	4.49523
3.45933	3.4397		3.52059		4.33299	3.78038
1.86412	2.23324		4.30579		1.54511	5.81186
5.43193	5.34085		4.77304		5.21195	3.78193
5.76038	6.96663		1.0753		4.98144	2.24011
3.29224	4.86762		4.78849		3.33488	4.17901
1.80646	3.1789		1.27636		3.29476	6.33667
1.31978	2.98794		2.34706		3.87277	4.66718
5.96531	5.33357		1.26858		1.57205	1.82457
5.94179	7.05273		3.84514		4.15249	5.38953
3.67667	10.5626		2.27623		2.27849	2.98134
3.55795	9.85837		4.26601		4.37293	6.38953
4.79836	6.26874		1.71055		4.78045	4.18882
1.49618	8.61221		0.843129		1.98801	6.32558
3.70792	10.5173		0.699866		5.10695	5.34173
4.80014	3.57688		0.568068		11.6846	5.19862
5.19744	16.0987		3.69749		2.18264	3.16915
2.20106	7.92142		3.67652		2.65455	5.10056
6.15588	2.36804		4.2393		2.29475	6.10551
3.22706	14.9141		2.0772		4.29319	5.53573
3.58146	3.10725		1.45017		7.21845	2.40552
4.41996	5.57517		5.21907		3.49169	1.67642
2.91473	4.87838		1.0521		4.8531	2.88185
2.48996	3.93124		4.08648		2.49983	5.59162
16.1215	1.92982		1.04428		4.33299	3.9623
2.9269	3.12514		3.35765		1.54511	4.43001
5.62093	5.61152		3.7355		5.21195	6.21729
2.86895	2.67167		21.8623		4.98144	6.2637
2.38643	2.48429		9.98929		3.33488	4.80425
6.78711	9.02153		1.54313		3.29476	4.00844
4.16386	5.37944		5.62363		3.87277	6.07832
7.05483	4.87838		4.06867		1.57205	4.71188
4.37344	3.76555		3.7465		4.15249	3.20041
2.95947	3.93124		4.29725		2.27849	6.1568
2.90177	1.92982		2.81439		4.37293	2.80943
2.09332	3.12514		14.865		4.78045	3.56314
5.07065	5.61152		2.51298		1.98801	2.49568
3.23858	2.67167		4.60573		5.10695	4.02588
3.22194	2.48429		8.45809		11.6846	5.52642
2.83566	9.02153		5.95878		2.18264	6.20102
4.70563	5.37944		20.9263		2.65455	1.43709
5.5873	4.87838		2.14562		2.29475	4.87125
3.58501	3.76555		2.05602		4.29319	2.01918
2.99805	3.93124		0.880276		7.21845	2.09154
0.575791	1.92982		3.92089		3.49169	5.39692
2.23684	3.12514		3.50001		4.8531	4.57517
3.95929	5.61152		2.84573		2.49983	9.14717
6.04689	2.67167		2.91905		4.33299	2.45759
3.00086	2.48429		3.21056		1.54511	4.07007
4.91692	9.02153		1.01623		5.21195	3.24006
4.13987	5.37944		2.67832		0.872002	3.04105
8.65512	4.90121		22.1112		4.98144	4.39343
2.57157	6.06665		4.96437		3.33488	2.42152
6.73429	9.80511		2.2396		3.29476	0.521108
3.26857	7.73726		4.30476		3.87277	7.27967
3.59356	6.24286		3.84162		1.57205	4.28336
5.14862	5.15856		1.88487		2.40206	6.37449
3.80833	4.90121		1.35099		4.15249	0.594733
1.99331	2.53233		2.96053		2.27849	3.41322
3.3514	6.06665		1.02303		4.37293	2.33649
16.3935	8.79803		2.11111		4.78045	1.38466
13.7585	9.80511		1.96914		1.98801	6.76322
18.4824	7.75241		1.53583		4.91359	3.83066
3.64181	7.73726		3.14856		5.10695	3.63688
4.5263	10.5131		3.16314		11.6846	1.01584
1.96419	6.24286		1.2106		2.18264	6.40938
3.13573	11.2753		1.38237		3.48028	4.60805
5.39682	5.15856		4.65808		2.65455	4.86018
1.77543	7.3115		4.17683		2.29475	1.8935
1.00825	6.89398		3.08516		4.29319	2.94267
6.94505	6.57831		4.48759		3.56588	3.92833
3.1683	5.48384		5.73336		7.21845	5.31389
18.4824	1.81279		4.33089		3.49169	6.95064
3.64181	1.34353		1.89957		4.8531	4.72732
4.5263	3.71637		17.1136		2.49983	4.34306
1.96419	5.58523		1.19298		4.33299	4.40391
3.13573	5.54473		15.7307		1.54511	3.38048
5.39682	4.90057		2.85222		5.21195	4.53518
1.77543	5.53473		0.54197		0.872002	7.75302
1.00825	3.67371		0.824931		3.49673	2.8728
6.94505	9.47111		1.91643		4.98144	3.58895
3.1683	4.90121		1.04929		3.33488	2.45958
18.4824	2.53233		0.742954		3.29476	5.71453
5.27666	9.4353		1.65385		3.87277	1.17041
3.64181	6.06665		1.75788		1.57205	1.71016
3.91831	8.79803		6.26977		2.40206	1.92599
4.5263	8.62903		1.89932		2.13011	4.79902
2.55384	9.80511		3.46636		4.15249	2.95
1.96419	7.75241		2.31643		2.27849	4.49523
4.03183	7.73726		4.12845		4.37293	3.78038
3.13573	10.5131		2.04768		4.78045	5.81186
4.04052	6.24286		3.03891		1.98801	3.78193
5.39682	11.2753		6.91595		4.91359	2.24011
4.11719	5.15856		2.97039		3.0306	4.17901
1.77543	7.3115		2.0745		5.10695	6.33667
1.00825	6.89398		1.10162		11.6846	4.66718
6.94505	6.57831		3.76264		2.18264	4.30151
3.1683	5.48384		3.74127		3.48028	1.82457
18.4824	1.81279		0.926457		2.55601	5.38953
5.27666	1.34353		2.25258		2.65455	2.98134
4.83401	3.71637		3.0349		2.29475	6.38953
3.64181	5.58523		2.36486		4.29319	4.18882
3.91831	5.54473		3.52059		3.56588	6.32558
4.38195	4.90057		3.34156		2.5965	5.34173
4.5263	5.53473		4.30579		7.21845	5.19862
2.55384	3.67371		4.77304		3.49169	7.4208
3.78776	9.47111		1.0753		3.54767	3.16915
1.96419	4.90121		4.78849		4.24151	5.10056
4.03183	2.53233		1.27636		4.8531	6.10551
3.13573	9.4353		2.34706		2.49983	5.53573
4.04052	4.51183		1.26858		4.33299	2.40552
5.39682	6.06665		3.84514		1.54511	1.67642
4.11719	8.79803		2.27623		5.21195	2.88185
1.77543	8.62903		4.26601		0.872002	5.59162
1.00825	3.98131		1.71055		3.49673	2.92861
6.94505	9.80511		5.693		4.98144	3.9623
3.1683	7.75241		0.843129		3.33488	4.43001
18.4824	3.36597		0.699866		3.29476	6.21729
5.27666	7.73726		0.568068		3.87277	6.2637
4.83401	10.5131		3.69749		1.57205	4.80425
3.29104	7.07341		3.67652		2.40206	4.00844
3.64181	6.24286		4.2393		2.13011	6.07832
3.91831	11.2753		2.0772		4.15249	4.71188
4.38195	5.15856		1.45017		2.27849	3.52528
6.10226	7.3115		5.21907		4.37293	3.20041
4.5263	6.89398		1.0521		4.78045	6.1568
2.55384	6.57831		4.08648		1.98801	2.80943
3.78776	5.48384		2.64899		4.91359	3.56314
4.32914	1.81279		1.04428		3.0306	2.49568
1.96419	1.34353		3.35765		5.10695	4.02588
4.03183	3.71637		3.7355		11.6846	5.52642
3.39968	5.58523		21.8623		2.18264	3.14366
3.13573	5.54473		9.98929		3.48028	6.20102
4.04052	4.90057		1.54313		2.55601	1.43709
4.151	5.53473		5.62363		2.65455	4.87125
5.39682	3.67371		4.06867		2.29475	2.01918
4.11719	9.47111		3.7465		4.29319	2.09154
4.55208	4.90121		4.29725		3.56588	5.39692
1.77543	2.53233		2.81439		2.5965	4.57517
2.23505	9.4353		14.865		7.21845	9.14717
1.00825	4.51183		2.51298		3.49169	2.45759
3.12148	4.24084		4.60573		3.54767	4.07007
6.94505	6.06665		8.45809		4.24151	3.24006
3.1683	8.79803		5.95878		4.8531	3.04105
18.4824	8.62903		20.9263		2.49983	4.39343
5.27666	3.98131		2.14562		4.33299	2.42152
4.83401	4.03983		2.05602		1.54511	0.521108
3.29104	9.80511		0.880276		5.21195	7.27967
7.6535	7.75241		3.92089		0.872002	4.28336
3.64181	3.36597		3.50001		3.49673	6.37449
3.91831	4.57006		2.84573		4.98144	0.594733
4.38195	7.73726		2.91905		3.33488	3.41322
6.10226	10.5131		3.21056		3.29476	2.33649
5.06527	7.07341		1.01623		3.87277	1.38466
4.5263	3.37466		2.67832		1.57205	6.76322
2.55384	6.24286		22.1112		2.40206	3.83066
3.78776	11.2753		4.96437		2.13011	3.63688
4.32914	3.12529		2.2396		4.15249	1.01584
10.8026	5.15856		4.30476		2.27849	6.40938
1.96419	7.3115		3.84162		4.37293	4.60805
4.03183	4.47455		2.41465		4.78045	4.86018
3.39968	6.89398		1.88487		1.98801	1.8935
2.90066	4.95124		1.35099		4.91359	2.94267
3.13573	6.57831		2.96053		3.0306	3.92833
4.04052	7.52433		1.02303		5.10695	5.31389
4.151	5.48384		2.11111		11.6846	6.95064
6.96369	5.11661		1.96914		2.18264	4.72732
5.39682	1.81279		1.53583		3.48028	4.34306
4.11719	6.73788		3.14856		2.55601	4.40391
4.55208	1.34353		3.16314		2.65455	3.38048
7.6164	4.55628		1.2106		2.29475	4.53518
1.77543	3.71637		1.38237		4.29319	7.75302
2.23505	13.8267		4.65808		3.56588	2.8728
1.28129	5.58523		4.68754		2.5965	3.58895
1.00825	5.54473		4.17683		7.21845	2.45958
3.12148	4.90057		3.08516		3.49169	5.71453
4.38869	5.53473		4.48759		3.54767	1.17041
6.94505	3.67371		5.73336		4.24151	1.71016
6.67063	9.47111		4.33089		4.8531	1.92599
3.1683	4.90121		1.89957		2.49983	4.79902
3.12465	2.53233		17.1136		4.33299	2.95
18.4824	9.4353		1.19298		1.54511	4.49523
5.27666	4.51183		15.7307		5.21195	3.78038
4.83401	4.24084		2.85222		0.872002	5.81186
3.29104	5.04723		0.54197		3.49673	3.78193
7.6535	6.06665		0.824931		3.74281	2.24011
9.3545	8.79803		2.55436		4.98144	4.17901
3.64181	8.62903		1.91643		3.33488	6.33667
3.91831	3.98131		1.04929		3.29476	4.66718
4.38195	4.03983		0.742954		3.87277	4.30151
6.10226	7.56626		1.65385		1.57205	6.60603
5.06527	9.80511		1.75788		2.40206	1.82457
16.9865	7.75241		6.26977		2.13011	5.38953
4.5263	3.36597		1.89932		2.46274	2.98134
2.55384	4.57006		3.46636		4.15249	6.38953
3.78776	9.58033		2.31643		2.27849	4.18882
4.32914	7.73726		4.12845		4.37293	6.32558
10.8026	10.5131		2.04768		4.78045	5.34173
10.5704	7.07341		3.03891		1.98801	5.19862
1.96419	3.37466		1.17994		4.91359	7.4208
4.03183	8.12447		6.91595		3.0306	4.17558
3.39968	6.24286		2.97039		8.4981	3.16915
2.90066	11.2753		2.0745		5.10695	5.10056
11.3178	3.12529		1.10162		11.6846	6.10551
3.13573	2.43968		3.76264		2.18264	5.53573
4.04052	5.15856		3.74127		3.48028	2.40552
4.151	7.3115		0.926457		2.55601	1.67642
6.96369	4.47455		2.25258		4.26619	2.88185
11.0312	9.24979		3.0349		2.65455	5.59162
5.39682	6.89398		2.36486		2.29475	2.92861
4.11719	4.95124		3.52059		4.29319	7.13214
4.55208	8.36932		3.34156		3.56588	3.9623
7.6164	6.57831		1.58526		2.5965	4.43001
2.77919	7.52433		4.30579		7.21845	6.21729
1.77543	2.94486		4.77304		3.49169	6.2637
2.23505	5.48384		1.0753		3.54767	4.80425
1.28129	5.11661		4.78849		4.24151	4.00844
4.6386	5.554		1.27636		4.8531	6.07832
1.00825	1.81279		2.34706		2.49983	4.71188
3.12148	6.73788		1.26858		4.33299	3.52528
4.38869	4.98247		3.84514		1.54511	6.01939
6.94505	1.34353		2.27623		5.21195	3.20041
6.67063	4.55628		4.26601		0.872002	6.1568
3.1683	1.80908		1.71055		3.49673	2.80943
3.12465	3.71637		5.693		3.74281	3.56314
3.12409	13.8267		3.10414		3.87593	2.49568
2.61575	6.21401		0.843129		4.98144	4.02588
18.2885	5.58523		0.699866		3.33488	5.52642
2.09253	5.54473		0.568068		3.29476	3.14366
5.73504	4.90057		3.69749		3.87277	2.95336
5.36312	5.53473		3.67652		1.57205	6.20102
6.45471	3.67371		4.2393		2.40206	1.43709
6.35065	9.47111		2.0772		2.13011	4.87125
4.00217	4.90121		1.45017		2.46274	2.01918
4.94079	2.53233		5.21907		2.52655	2.09154
1.38553	9.4353		1.0521		4.15249	5.39692
3.242	4.51183		4.08648		2.27849	4.57517
3.12409	4.24084		2.64899		4.37293	9.14717
1.41543	5.04723		1.75465		4.78045	6.5635
2.61575	4.18988		1.04428		1.98801	2.45759
2.25045	6.06665		3.35765		4.91359	4.07007
18.2885	8.79803		3.7355		3.0306	3.24006
3.33812	8.62903		21.8623		8.4981	3.04105
2.09253	3.98131		9.98929		4.80625	4.39343
2.21536	4.03983		1.54313		5.10695	2.42152
5.73504	7.56626		5.62363		11.6846	0.521108
3.72767	4.75333		4.06867		2.18264	7.27967
5.36312	9.80511		3.7465		3.48028	3.59044
2.09207	7.75241		2.60014		2.55601	4.28336
6.45471	3.36597		4.29725		4.26619	6.37449
2.83844	4.57006		2.81439		2.46002	0.594733
6.35065	9.58033		14.865		2.65455	3.41322
6.57063	6.49637		2.51298		2.29475	2.33649
4.00217	7.73726		4.60573		4.29319	1.38466
7.67327	10.5131		8.45809		3.56588	6.76214
4.94079	7.07341		5.95878		2.5965	6.76322
9.66816	3.37466		20.9263		7.21845	3.83066
1.38553	8.12447		2.14562		3.49169	3.63688
2.59401	9.45036		2.05602		3.54767	1.01584
3.242	6.24286		0.880276		4.24151	6.40938
2.75702	11.2753		4.22702		4.8531	3.51301
3.12409	3.12529		2.61694		2.49983	4.60805
1.41543	2.43968		6.78391		4.33299	4.86018
1.99131	2.75097		3.62273		1.54511	1.8935
2.61575	5.15856		2.80779		5.21195	2.94267
2.25045	7.3115		10.9632		0.872002	3.92833
5.40644	4.47455		6.34492		3.49673	5.31389
18.2885	9.24979		11.2541		3.74281	6.95064
3.33812	3.55556		11.1668		3.87593	4.72732
1.34404	6.89398		4.22702		3.75366	4.34306
2.09253	4.95124		6.68987		4.98144	4.40391
2.21536	8.36932		2.61694		3.33488	3.38048
2.87573	6.15051		11.0489		3.29476	4.53518
5.73504	6.57831		6.78391		3.87277	7.75302
3.72767	7.52433		5.48833		1.57205	2.8728
1.87423	2.94486		3.62273		2.40206	3.58895
5.36312	4.51833		13.0096		2.13011	2.45958
2.09207	5.48384		2.80779		2.46274	5.71453
4.06351	5.11661		4.20616		2.52655	1.17041
6.45471	5.554		10.9632		2.2819	1.71016
2.83844	3.07686		10.6664		4.15249	1.92599
19.7564	1.81279		6.34492		2.27849	4.79902
6.35065	6.73788		13.0094		4.37293	2.95
6.57063	4.98247		11.2541		4.78045	4.49523
2.68928	3.69804		4.19227		1.98801	3.78038
4.00217	1.34353		11.1668		4.91359	5.81186
7.67327	4.55628		6.00911		3.0306	3.78193
2.03668	1.80908		4.22702		8.4981	2.24011
4.94079	4.19678		6.68987		4.80625	4.17901
9.66816	3.71637		3.09865		2.2311	6.33667
5.14736	13.8267		2.61694		5.10695	4.66718
1.38553	6.21401		11.0489		11.6846	4.30151
2.59401	6.83345		2.03146		2.18264	6.60603
5.90899	5.58523		6.78391		3.48028	1.82457
3.242	5.54473		5.48833		2.55601	5.38953
2.75702	4.90057		3.41096		4.26619	2.98134
8.1204	5.53473		3.62273		2.46002	6.38953
5.55235	3.67371		13.0096		4.32868	4.18882
3.12409	9.47111		12.8531		2.65455	6.32558
1.41543	4.90121		2.80779		2.29475	5.34173
1.99131	2.53233		4.20616		4.29319	5.19862
2.61575	9.4353		4.28996		3.56588	7.4208
2.25045	4.51183		10.9632		2.5965	4.17558
5.40644	4.24084		10.6664		4.93514	3.16915
18.2885	5.04723		5.42648		7.21845	5.10056
3.33812	4.18988		6.34492		3.49169	6.10551
1.34404	4.25011		13.0094		3.54767	5.53573
2.09253	6.06665		11.2541		5.83831	2.40552
2.21536	8.79803		4.19227		4.24151	1.67642
2.87573	8.62903		11.1668		3.93683	2.88185
5.73504	3.98131		6.00911		8.79248	5.59162
3.72767	4.03983		4.22702		4.8531	2.92861
1.87423	7.56626		6.68987		2.49983	7.13214
5.36312	4.75333		3.09865		4.33299	3.9623
2.09207	3.83025		2.9034		1.54511	4.43001
4.06351	9.80511		2.61694		5.21195	6.21729
6.45471	7.75241		11.0489		0.872002	6.2637
2.83844	3.36597		2.03146		3.49673	4.80425
19.7564	4.57006		0.969208		3.74281	4.00844
6.35065	9.58033		6.78391		3.87593	6.07832
6.57063	6.49637		5.48833		3.75366	4.71188
2.68928	7.75038		3.41096		4.98144	3.52528
4.00217	7.73726		1.60988		3.33488	6.01939
7.67327	10.5131		3.62273		3.29476	3.20041
2.03668	7.07341		13.0096		3.87277	6.1568
4.94079	3.37466		12.8531		1.57205	2.80943
9.66816	8.12447		4.89382		2.40206	3.56314
5.14736	9.45036		2.80779		2.13011	2.49568
1.38553	3.82384		4.20616		2.46274	4.02588
2.59401	6.24286		4.28996		2.52655	5.52642
5.90899	11.2753		2.50967		2.2819	3.14366
3.242	3.12529		10.9632		4.15249	2.95336
2.75702	2.43968		10.6664		2.27849	6.20102
8.1204	2.75097		5.42648		4.37293	1.43709
5.55235	4.13243		3.69879		4.78045	4.87125
3.12409	5.15856		6.34492		1.98801	2.01918
1.41543	7.3115		13.0094		4.91359	2.09154
1.99131	4.47455		10.6248		3.0306	5.39692
2.61575	9.24979		11.2541		8.4981	4.57517
2.25045	3.55556		4.19227		4.80625	9.14717
5.40644	4.00918		15.5338		2.2311	6.5635
18.2885	6.89398		11.1668		5.10695	2.45759
3.33812	4.95124		6.00911		11.6846	4.07007
1.34404	8.36932		3.54554		2.18264	3.24006
2.09253	6.15051		12.5948		3.48028	3.04105
2.21536	3.64573		4.22702		2.55601	4.39343
2.87573	6.57831		6.68987		4.26619	2.42152
5.73504	7.52433		3.09865		2.46002	0.521108
3.72767	2.94486		2.9034		4.32868	7.27967
1.87423	4.51833		2.32903		2.65455	3.59044
5.36312	4.79289		2.61694		2.29475	4.28336
2.09207	5.48384		11.0489		4.29319	6.37449
4.06351	5.11661		2.03146		3.56588	0.594733
6.45471	5.554		0.969208		2.5965	3.41322
2.83844	3.07686		1.62644		4.93514	2.33649
19.7564	3.53802		6.78391		7.21845	1.38466
6.35065	1.81279		5.48833		3.49169	6.76214
6.57063	6.73788		3.41096		3.54767	6.76322
2.68928	4.98247		1.60988		5.83831	3.83066
4.00217	3.69804		1.79369		4.24151	3.63688
7.67327	5.13822		3.62273		3.93683	1.01584
2.03668	1.34353		13.0096		8.79248	6.40938
4.94079	4.55628		12.8531		4.8531	3.51301
9.66816	1.80908		4.89382		2.49983	4.60805
5.14736	4.19678		6.87971		4.33299	4.86018
1.38553	4.28417		2.80779		1.54511	1.8935
2.59401	3.71637		4.20616		5.21195	2.94267
5.90899	13.8267		4.28996		0.872002	3.92833
3.242	6.21401		2.50967		3.49673	5.31389
2.75702	6.83345		2.55885		3.74281	6.95064
8.1204	5.58523		10.9632		3.87593	4.72732
5.55235	5.54473		10.6664		3.75366	4.34306
3.12409	4.90057		5.42648		4.98144	4.40391
1.41543	5.53473		3.69879		3.33488	3.38048
1.99131	3.67371		8.16633		3.29476	4.53518
2.61575	9.47111		6.34492		3.87277	7.75302
2.25045	4.90121		13.0094		1.57205	2.8728
5.40644	2.53233		10.6248		2.40206	3.58895
18.2885	9.4353		14.2437		2.13011	2.45958
3.33812	4.51183		11.2541		2.46274	5.71453
1.34404	4.24084		4.19227		2.52655	1.17041
2.09253	5.04723		15.5338		2.2819	1.71016
2.21536	4.18988		3.22911		4.15249	1.92599
2.87573	4.25011		11.1668		2.27849	4.79902
5.73504	6.23919		6.00911		4.37293	6.31899
3.72767	6.06665		3.54554		4.78045	2.95
1.87423	8.79803		26.9419		1.98801	4.49523
5.36312	8.62903		12.5948		4.91359	3.78038
2.09207	3.98131		4.22702		3.0306	5.81186
4.06351	4.03983		6.68987		8.4981	3.78193
6.45471	7.56626		3.09865		4.80625	2.24011
2.83844	4.75333		2.9034		2.2311	4.17901
19.7564	3.83025		2.32903		5.10695	6.33667
6.35065	4.94514		2.61694		11.6846	4.66718
6.57063	9.80511		11.0489		2.18264	4.30151
2.68928	7.75241		2.03146		3.48028	6.60603
4.00217	3.36597		0.969208		2.55601	5.96583
7.67327	4.57006		1.62644		4.26619	1.82457
2.03668	9.58033		6.78391		2.46002	5.38953
4.94079	6.49637		5.48833		4.32868	2.98134
9.66816	7.75038		3.41096		2.65455	6.38953
5.14736	7.16119		1.60988		2.29475	4.18882
1.38553	7.73726		1.79369		4.29319	6.32558
2.59401	10.5131		3.62273		3.56588	5.34173
5.90899	7.07341		13.0096		2.5965	5.19862
3.242	3.37466		12.8531		4.93514	7.4208
2.75702	8.12447		4.89382		7.21845	4.17558
8.1204	9.45036		6.87971		3.49169	6.30701
5.55235	3.82384		2.80779		3.54767	3.16915
3.12409	7.38569		4.20616		5.83831	5.10056
1.41543	6.24286		4.28996		4.24151	6.10551
1.99131	11.2753		2.50967		3.93683	5.53573
2.61575	3.12529		2.55885		8.79248	2.40552
2.25045	2.43968		10.9632		4.8531	1.67642
5.40644	2.75097		10.6664		2.49983	2.88185
18.2885	4.13243		5.42648		4.33299	5.59162
3.33812	6.24994		3.69879		1.54511	2.92861
1.34404	5.15856		8.16633		5.21195	7.13214
2.09253	7.3115		6.34492		0.872002	3.07709
2.21536	4.47455		13.0094		3.49673	3.9623
2.87573	9.24979		10.6248		3.74281	4.43001
5.73504	3.55556		14.2437		3.87593	6.21729
3.72767	4.00918		11.2541		3.75366	6.2637
1.87423	5.06229		4.19227		11.1015	4.80425
5.36312	6.89398		15.5338		4.98144	4.00844
2.09207	4.95124		3.22911		3.33488	6.07832
4.06351	8.36932		11.1668		3.29476	4.71188
6.45471	6.15051		6.00911		3.87277	3.52528
2.83844	3.64573		3.54554		1.57205	6.01939
19.7564	6.59237		26.9419		2.40206	6.42099
6.35065	6.57831		12.5948		2.13011	3.20041
6.57063	7.52433		4.22702		2.46274	6.1568
2.68928	2.94486		6.68987		2.52655	2.80943
4.00217	4.51833		3.09865		2.2819	3.56314
7.67327	4.79289		2.9034		4.70072	2.49568
2.03668	6.4513		2.32903		4.15249	4.02588
4.94079	5.48384		1.79177		2.27849	5.52642
9.66816	5.11661		2.61694		4.37293	3.14366
5.14736	5.554		11.0489		4.78045	2.95336
1.38553	3.07686		2.03146		1.98801	5.76342
2.59401	3.53802		0.969208		4.91359	6.20102
5.90899	4.66794		1.62644		3.0306	1.43709
3.242	1.81279		3.98187		8.4981	4.87125
2.75702	6.73788		6.78391		4.80625	2.01918
8.1204	4.98247		5.48833		2.2311	2.09154
5.55235	3.69804		3.41096		4.51054	5.39692
3.12409	5.13822		1.60988		5.10695	4.57517
1.41543	5.78083		1.79369		11.6846	9.14717
1.99131	1.34353		3.57451		2.18264	6.5635
5.47524	4.55628		3.62273		3.48028	6.24015
2.61575	1.80908		13.0096		2.55601	2.45759
2.25045	4.19678		12.8531		4.26619	4.07007
5.40644	4.28417		4.89382		2.46002	3.24006
5.3489	7.98846		6.87971		4.32868	3.04105
18.2885	3.71637		2.68387		2.82966	4.39343
3.33812	13.8267		2.80779		2.65455	2.42152
1.34404	6.21401		4.20616		2.29475	0.521108
6.51998	6.83345		4.28996		4.29319	7.27967
2.09253	5.58523		2.50967		3.56588	3.59044
2.21536	5.54473		2.55885		2.5965	4.48195
2.87573	4.90057		6.43987		4.93514	4.28336
4.99883	5.53473		10.9632		3.0089	6.37449
5.73504	3.67371		10.6664		7.21845	0.594733
3.72767	9.47111		5.42648		3.49169	3.41322
1.87423			3.69879		3.54767	2.33649
4.66031			8.16633		5.83831	1.38466
5.36312			5.73072		4.14509	6.76214
2.09207			6.34492		4.24151	6.76322
4.06351			13.0094		3.93683	3.83066
6.24131			10.6248		4.25309	3.63688
6.45471			14.2437		8.79248	1.01584
2.83844			1.94231		3.44108	6.40938
19.7564			11.2541		4.21217	3.51301
20.1686			4.19227		3.77019	4.60805
6.35065			15.5338		3.79366	4.86018
6.57063			3.22911		3.44108	1.8935
2.68928			3.37079		4.37181	2.94267
6.01499			11.1668		4.21217	3.92833
4.00217			6.00911		3.77019	5.31389
7.67327			3.54554		3.79366	6.95064
2.03668			26.9419		3.44108	4.72732
5.34134			3.45448		4.37181	4.34306
4.94079			12.5948		4.31798	4.40391
9.66816			4.57814		4.21217	3.38048
5.14736			4.22702		5.09029	4.53518
5.53225			6.68987		3.77019	7.75302
1.38553			3.09865		2.9346	2.8728
2.59401			2.9034		3.79366	3.58895
5.90899			2.32903		3.44108	2.45958
2.70247			1.79177		4.37181	5.71453
3.242			4.13151		4.31798	1.17041
2.75702			2.61694		4.21217	1.71016
8.1204			11.0489		5.09029	1.92599
7.94736			2.03146		3.77019	4.79902
5.55235			0.969208		2.9346	6.31899
3.12409			1.62644		3.79366	5.74338
1.41543			3.98187		3.44108	2.95
1.99131			2.90715		4.37181	4.49523
5.47524			6.78391		4.31798	3.78038
2.74509			5.48833		4.87729	5.81186
2.61575			3.41096		4.21217	3.78193
2.25045			1.60988		5.09029	2.24011
5.40644			1.79369		2.79997	4.17901
5.3489			3.57451		3.77019	6.33667
10.9285			0.519779		2.9346	4.66718
18.2885			3.62273		2.64254	4.30151
3.33812			13.0096		3.79366	6.60603
1.34404			12.8531		1.45968	5.96583
6.51998			4.89382		2.08982	5.56957
9.94835			6.87971		3.44108	1.82457
2.09253			2.68387		4.37181	5.38953
2.21536			4.27354		4.31798	2.98134
2.87573			2.80779		4.87729	6.38953
4.99883			4.20616		7.35169	4.18882
5.50361			4.28996		4.21217	6.32558
5.73504			2.50967		5.09029	5.34173
3.72767			2.55885		2.79997	5.19862
1.87423			6.43987		3.48149	7.4208
4.66031			0.677879		3.77019	4.17558
2.88451			10.9632		2.9346	6.30701
5.36312			10.6664		2.64254	11.659
2.09207			5.42648		3.70489	3.16915
4.06351			3.69879		3.79366	5.10056
6.24131			8.16633		1.45968	6.10551
3.8093			5.73072		6.00251	5.53573
6.45471			6.93048		2.08982	2.40552
2.83844			6.34492		3.16609	1.67642
19.7564			13.0094		3.44108	2.88185
20.1686			10.6248		4.37181	5.59162
6.79027			14.2437		4.31798	2.92861
6.35065			1.94231		4.87729	7.13214
6.57063			1.42119		7.35169	3.07709
2.68928			11.2541		3.56096	6.91427
6.01499			4.19227		4.21217	3.9623
4.63234			15.5338		5.09029	4.43001
4.00217			3.22911		2.79997	6.21729
7.67327			3.37079		3.48149	6.2637
2.03668			1.27394		2.43098	4.80425
5.34134			11.1668		3.77019	4.00844
2.54923			6.00911		2.9346	6.07832
4.94079			3.54554		2.64254	4.71188
9.66816			26.9419		3.70489	3.52528
5.14736			3.45448		3.79366	6.01939
5.53225			1.71378		1.45968	6.42099
8.24057			12.5948		6.00251	12.233
1.38553			4.57814		2.08982	3.20041
2.59401			1.55632		3.16609	6.1568
5.90899			4.22702		3.44108	2.80943
2.70247			6.68987		4.37181	3.56314
3.242			3.09865		4.31798	2.49568
2.75702			2.9034		4.87729	4.02588
8.1204			2.32903		7.35169	5.52642
7.94736			1.79177		3.56096	3.14366
5.55235			4.13151		4.21217	2.95336
3.12409			2.61694		5.09029	5.76342
1.41543			11.0489		2.79997	5.59683
1.99131			2.03146		3.48149	6.20102
5.47524			0.969208		2.43098	1.43709
2.74509			1.62644		3.77019	4.87125
2.61575			3.98187		2.9346	2.01918
2.25045			2.90715		2.64254	2.09154
5.40644			6.78391		3.70489	5.39692
5.3489			5.48833		3.79366	4.57517
10.9285			3.41096		1.45968	9.14717
18.2885			1.60988		6.00251	6.5635
3.33812			1.79369		2.08982	6.24015
1.34404			3.57451		3.16609	7.31585
6.51998			0.519779		3.44108	2.45759
9.94835			3.62273		4.37181	4.07007
2.09253			13.0096		4.31798	3.24006
2.21536			12.8531		4.87729	3.04105
2.87573			4.89382		7.35169	4.39343
4.99883			6.87971		3.56096	2.42152
5.50361			2.68387		4.21217	0.521108
5.73504			4.27354		5.09029	7.27967
3.72767			2.80779		2.79997	3.59044
1.87423			4.20616		3.48149	4.48195
4.66031			4.28996		2.43098	5.43984
2.88451			2.50967		3.77019	4.28336
5.36312			2.55885		2.9346	6.37449
2.09207			6.43987		2.64254	0.594733
4.06351			0.677879		3.70489	3.41322
6.24131			10.9632		3.79366	2.33649
3.8093			10.6664		1.45968	1.38466
6.45471			5.42648		6.00251	6.76214
2.83844			3.69879		2.08982	6.76322
19.7564			8.16633		3.16609	3.83066
20.1686			5.73072		3.44108	3.63688
6.79027			6.93048		4.37181	1.01584
6.35065			6.34492		4.31798	6.40938
6.57063			13.0094		4.87729	3.51301
2.68928			10.6248		7.35169	4.60805
6.01499			14.2437		3.56096	4.86018
4.63234			1.94231		4.21217	1.8935
4.00217			1.42119		5.09029	2.94267
7.67327			11.2541		2.79997	3.92833
2.03668			4.19227		3.48149	5.31389
5.34134			15.5338		2.43098	6.95064
2.54923			3.22911		3.77019	4.72732
4.94079			3.37079		2.9346	4.34306
9.66816			1.27394		2.64254	4.40391
5.14736			11.1668		3.70489	3.38048
5.53225			6.00911		3.79366	4.53518
8.24057			3.54554		1.45968	7.75302
1.38553			26.9419		6.00251	2.8728
2.59401			3.45448		2.08982	3.58895
5.90899			1.71378		3.16609	2.45958
2.70247			12.5948		3.44108	5.71453
3.242			4.57814		4.37181	1.17041
2.75702			1.55632		4.31798	1.71016
8.1204			4.22702		4.87729	1.92599
7.94736			6.68987		7.35169	4.79902
5.55235			3.09865		3.56096	6.31899
3.12409			2.9034		4.90824	5.74338
1.41543			2.32903		4.21217	5.85377
1.99131			1.79177		5.09029	2.95
5.47524			4.13151		2.79997	4.49523
2.74509			2.61694		3.48149	3.78038
2.06172			11.0489		2.43098	5.81186
2.61575			2.03146		11.1892	3.78193
2.25045			0.969208		3.77019	2.24011
5.40644			1.62644		2.9346	4.17901
5.3489			3.98187		2.64254	6.33667
10.9285			2.90715		3.70489	4.66718
12.8679			6.78391		3.46637	4.30151
18.2885			5.48833		3.79366	6.60603
3.33812			3.41096		1.45968	5.96583
1.34404			1.60988		6.00251	5.56957
6.51998			1.79369		1.70287	6.63626
9.94835			3.57451		2.08982	1.82457
4.46766			0.519779		3.16609	5.38953
2.09253			3.62273		3.86764	2.98134
2.21536			13.0096		3.44108	6.38953
2.87573			12.8531		4.37181	4.18882
4.99883			4.89382		4.31798	6.32558
5.50361			6.87971		4.87729	5.34173
7.45324			2.68387		7.35169	5.19862
5.73504			4.27354		3.56096	7.4208
3.72767			2.80779		4.90824	4.17558
1.87423			4.20616		1.39329	6.30701
4.66031			4.28996		4.21217	11.659
2.88451			2.50967		5.09029	3.73449
9.58686			2.55885		2.79997	3.16915
5.36312			6.43987		3.48149	5.10056
2.09207			0.677879		2.43098	6.10551
4.06351			10.9632		11.1892	5.53573
6.24131			10.6664		2.92732	2.40552
3.8093			5.42648		3.77019	1.67642
9.23464			3.69879		2.9346	2.88185
6.45471			8.16633		2.64254	5.59162
2.83844			5.73072		3.70489	2.92861
19.7564			6.93048		3.46637	7.13214
20.1686			6.34492		2.55744	3.07709
6.79027			13.0094		3.79366	6.91427
7.76242			10.6248		1.45968	7.21226
6.35065			14.2437		6.00251	3.9623
6.57063			1.94231		1.70287	4.43001
2.68928			1.42119		2.89681	6.21729
6.01499			11.2541		2.08982	6.2637
4.63234			4.19227		3.16609	4.80425
4.97502			15.5338		3.86764	4.00844
4.00217			3.22911		10.4758	6.07832
7.67327			3.37079		3.44108	4.71188
2.03668			1.27394		4.37181	3.52528
5.34134			11.1668		4.31798	6.01939
2.54923			6.00911		4.87729	6.42099
4.24916			3.54554		7.35169	12.233
4.94079			26.9419		3.56096	7.14219
9.66816			3.45448		4.90824	3.20041
5.14736			1.71378		1.39329	6.1568
5.53225			12.5948		4.21217	2.80943
8.24057			4.57814		5.09029	3.56314
1.38553			1.55632		2.79997	2.49568
2.59401			4.22702		3.48149	4.02588
5.90899			6.68987		2.43098	5.52642
2.70247			3.09865		11.1892	3.14366
3.242			2.9034		2.92732	2.95336
2.75702			2.32903		4.17909	5.76342
8.1204			1.79177		3.77019	5.59683
7.94736			4.13151		2.9346	4.78106
5.55235			3.20335		2.64254	6.20102
3.12409			2.61694		3.70489	1.43709
1.41543			11.0489		3.46637	4.87125
1.99131			2.03146		2.55744	2.01918
5.47524			0.969208		3.43717	2.09154
2.74509			1.62644		3.79366	5.39692
2.06172			3.98187		1.45968	4.57517
3.67139			2.90715		6.00251	9.14717
2.61575			6.03414		1.70287	6.5635
2.25045			6.78391		2.89681	6.24015
5.40644			5.48833		2.22286	7.31585
5.3489			3.41096		2.08982	5.09137
10.9285			1.60988		3.16609	2.45759
12.8679			1.79369		3.86764	4.07007
6.98875			3.57451		10.4758	3.24006
18.2885			0.519779		4.19997	3.04105
3.33812			2.77477		3.44108	4.39343
1.34404			3.62273		4.37181	2.42152
6.51998			13.0096		4.31798	0.521108
9.94835			12.8531		4.87729	7.27967
4.46766			4.89382		7.35169	3.59044
8.55365			6.87971		3.56096	4.48195
2.09253			2.68387		4.90824	5.43984
2.21536			4.27354		1.39329	9.00697
2.87573			1.36613		5.66075	4.28336
4.99883			2.80779		4.21217	6.37449
5.50361			4.20616		5.09029	0.594733
7.45324			4.28996		2.79997	3.41322
23.8235			2.50967		3.48149	2.33649
5.73504			2.55885		2.43098	1.38466
3.72767			6.43987		11.1892	6.76214
1.87423			0.677879		2.92732	7.53174
4.66031			3.99281		4.17909	6.76322
2.88451			10.9632		2.00631	3.83066
9.58686			10.6664		3.77019	3.63688
6.35169			5.42648		2.9346	1.01584
5.36312			3.69879		2.64254	6.40938
2.09207			8.16633		3.70489	3.51301
4.06351			5.73072		3.46637	8.01376
6.24131			6.93048		2.55744	4.60805
3.8093			6.36318		3.43717	4.86018
9.23464			6.34492		3.03742	1.8935
8.39758			13.0094		3.79366	2.94267
6.45471			10.6248		1.45968	3.92833
2.83844			14.2437		6.00251	5.31389
19.7564			1.94231		1.70287	6.95064
20.1686			1.42119		2.89681	4.72732
6.79027			3.81961		2.22286	4.34306
7.76242			11.2541		3.72013	4.40391
3.87292			4.19227		2.08982	3.38048
6.35065			15.5338		3.16609	4.53518
6.57063			3.22911		3.86764	7.75302
2.68928			3.37079		10.4758	2.8728
6.01499			1.27394		4.1713	3.58895
4.63234			13.4256		4.19997	2.45958
4.97502			11.1668		3.44108	5.71453
4.23108			6.00911		4.37181	1.17041
4.00217			3.54554		4.31798	1.71016
7.67327			26.9419		4.87729	1.92599
2.03668			3.45448		7.35169	4.79902
5.34134			1.71378		3.56096	6.31899
2.54923			1.83912		4.90824	5.74338
4.24916			12.5948		1.39329	5.85377
4.94079			4.57814		5.66075	7.04814
9.66816			1.55632		4.21217	2.95
5.14736			1.84689		5.09029	4.49523
5.53225			4.22702		2.79997	3.78038
8.24057			6.68987		3.48149	5.81186
1.38553			3.09865		2.43098	3.78193
2.59401			2.9034		11.1892	2.24011
5.90899			2.32903		2.92732	4.17901
2.70247			1.79177		4.17909	6.33667
3.242			4.13151		2.00631	4.66718
2.75702			3.20335		3.77019	4.30151
8.1204			1.93234		2.9346	6.60603
7.94736			2.61694		2.64254	5.96583
5.55235			11.0489		3.70489	5.56957
3.12409			2.03146		3.46637	6.63626
1.41543			0.969208		2.55744	6.44023
1.99131			1.62644		3.43717	1.82457
5.47524			3.98187		3.03742	5.38953
2.74509			2.90715		3.79366	2.98134
2.06172			6.03414		1.45968	6.38953
3.67139			4.42873		6.00251	4.18882
4.41267			6.78391		1.70287	6.32558
2.61575			5.48833		2.89681	5.34173
2.25045			3.41096		2.22286	5.19862
5.40644			1.60988		3.72013	7.4208
5.3489			1.79369		2.08982	4.17558
10.9285			3.57451		3.16609	6.30701
12.8679			0.519779		3.86764	11.659
6.98875			2.77477		10.4758	3.73449
5.84611			3.63582		4.1713	8.4225
18.2885			3.62273		4.19997	3.16915
3.33812			13.0096		3.44108	5.10056
1.34404			12.8531		4.37181	6.10551
6.51998			4.89382		4.31798	5.53573
9.94835			6.87971		4.87729	2.40552
4.46766			2.68387		7.35169	1.67642
8.55365			4.27354		3.56096	2.88185
3.16296			1.36613		4.90824	5.59162
2.09253			16.1445		1.39329	2.92861
2.21536			2.80779		5.66075	7.13214
2.87573			4.20616		4.21217	3.07709
4.99883			4.28996		5.09029	6.91427
5.50361			2.50967		2.79997	7.21226
7.45324			2.55885		3.48149	8.40797
23.8235			6.43987		2.43098	3.9623
10.9935			0.677879		11.1892	4.43001
5.73504			3.99281		2.92732	6.21729
3.72767			3.63139		4.17909	6.2637
1.87423			10.9632		2.00631	4.80425
4.66031			10.6664		3.77019	4.00844
2.88451			5.42648		2.9346	6.07832
9.58686			3.69879		2.64254	4.71188
6.35169			8.16633		3.70489	3.52528
6.62677			5.73072		3.46637	6.01939
5.36312			6.93048		2.55744	6.42099
2.09207			6.36318		3.43717	12.233
4.06351			12.0603		3.03742	7.14219
6.24131			6.34492		3.79366	5.82149
3.8093			13.0094		1.45968	3.20041
9.23464			10.6248		6.00251	6.1568
8.39758			14.2437		1.70287	2.80943
4.10883			1.94231		2.89681	3.56314
6.45471			1.42119		2.22286	2.49568
2.83844			3.81961		3.72013	4.02588
19.7564			3.01632		2.08982	5.52642
20.1686			11.2541		3.16609	3.14366
6.79027			4.19227		3.86764	2.95336
7.76242			15.5338		10.4758	5.76342
3.87292			3.22911		4.1713	5.59683
5.57055			3.37079		4.19997	4.78106
6.35065			1.27394			5.23565
6.57063			13.4256			6.20102
2.68928			1.48631			1.43709
6.01499			11.1668			4.87125
4.63234			6.00911			2.01918
4.97502			3.54554			2.09154
4.23108			26.9419			5.39692
3.80638			3.45448			4.57517
4.00217			1.71378			9.14717
7.67327			1.83912			6.5635
2.03668			12.5948			6.24015
5.34134			4.57814			7.31585
2.54923			1.55632			5.09137
4.24916			1.84689			8.12273
4.48475			4.22702			2.45759
4.94079			6.68987			4.07007
9.66816			3.09865			3.24006
5.14736			2.9034			3.04105
5.53225			2.32903			4.39343
8.24057			1.79177			2.42152
1.38553			4.13151			0.521108
2.59401			3.20335			7.27967
5.90899			1.93234			3.59044
2.70247			3.03803			4.48195
3.242			2.61694			5.43984
2.75702			11.0489			9.00697
8.1204			2.03146			5.95107
7.94736			0.969208			4.28336
5.55235			1.62644			6.37449
			3.98187			0.594733
			2.90715			3.41322
			6.03414			2.33649
			4.42873			1.38466
			1.92			6.76214
			6.78391			7.53174
			5.48833			6.76322
			3.41096			3.83066
			1.60988			3.63688
			1.79369			1.01584
			3.57451			6.40938
			0.519779			3.51301
			2.77477			8.01376
			3.63582			4.60805
			3.25202			4.86018
			3.62273			1.8935
			13.0096			2.94267
			12.8531			3.92833
			4.89382			5.31389
			6.87971			6.95064
			2.68387			4.72732
			4.27354			4.34306
			1.36613			4.40391
			16.1445			3.38048
			2.50363			4.53518
			2.80779			2.05261
			4.20616			3.44327
			4.28996			1.02692
			2.50967			2.79292
			2.55885			2.97585
			6.43987			5.92328
			0.677879			2.05261
			3.99281			1.54068
			3.63139			3.44327
			1.52116			1.09697
			10.9632			1.02692
			10.6664			2.36106
			5.42648			2.79292
			3.69879			1.37502
			8.16633			2.40034
			5.73072			7.43597
			6.93048			2.07456
			6.36318			2.97585
			12.0603			3.49048
			4.90702			5.92328
			6.34492			8.72314
			13.0094			2.49387
			10.6248			7.55086
			14.2437			2.05261
			1.94231			1.54068
			1.42119			3.59751
			3.81961			3.44327
			3.01632			1.09697
			8.82842			2.93003
			11.2541			1.02692
			4.19227			2.36106
			15.5338			1.68076
			3.22911			2.79292
			3.37079			1.37502
			1.27394			1.88692
			13.4256			2.40034
			1.48631			6.74557
			9.37826			7.43597
			11.1668			3.24939
			6.00911			2.07456
			3.54554			10.7226
			26.9419			2.97585
			3.45448			3.49048
			1.71378			3.48553
			1.83912			5.92328
			7.96798			8.72314
			12.5948			2.09324
			4.57814			2.49387
			1.55632			7.55086
			1.84689			2.05261
			4.22702			1.54068
			6.68987			3.59751
			3.09865			4.97435
			2.9034			3.44327
			2.32903			1.09697
			1.79177			2.93003
			4.13151			2.45023
			3.20335			1.02692
			1.93234			2.36106
			3.03803			1.68076
			6.16704			1.87384
			2.61694			2.79292
			11.0489			1.37502
			2.03146			1.88692
			0.969208			2.45419
			1.62644			2.40034
			3.98187			6.74557
			2.90715			7.43597
			6.03414			3.24939
			4.42873			2.07456
			1.92			10.7226
			2.31601			2.97585
			6.78391			3.49048
			5.48833			3.48553
			3.41096			5.92328
			1.60988			8.72314
			1.79369			2.09324
			3.57451			2.49387
			0.519779			7.55086
			2.77477			2.05261
			3.63582			1.54068
			3.25202			3.59751
			5.61014			4.97435
			3.62273			3.97154
			13.0096			3.44327
			12.8531			1.09697
			4.89382			2.93003
			6.87971			2.45023
			2.68387			9.07051
			4.27354			1.02692
			1.36613			2.36106
			16.1445			1.68076
			2.50363			1.87384
			3.18598			2.79292
			2.80779			1.37502
			4.20616			1.88692
			4.28996			2.45419
			2.50967			2.40034
			2.55885			6.74557
			6.43987			7.43597
			0.677879			3.24939
			3.99281			2.07456
			3.63139			10.7226
			1.52116			2.97585
			7.90754			3.49048
			10.9632			3.48553
			10.6664			5.92328
			5.42648			8.72314
			3.69879			2.09324
			8.16633			2.49387
			5.73072			7.55086
			6.93048			2.05261
			6.36318			1.54068
			12.0603			3.59751
			4.90702			4.97435
			6.30838			3.97154
			6.34492			2.30763
			13.0094			3.44327
			10.6248			1.09697
			14.2437			2.93003
			1.94231			2.45023
			1.42119			9.07051
			3.81961			1.85626
			3.01632			1.02692
			8.82842			2.36106
			6.82872			1.68076
			11.2541			1.87384
			4.19227			2.23949
			15.5338			2.79292
			3.22911			1.37502
			3.37079			1.88692
			1.27394			2.45419
			13.4256			2.40034
			1.48631			6.74557
			9.37826			7.43597
			11.1668			3.24939
			6.00911			2.07456
			3.54554			10.7226
			26.9419			2.97585
			3.45448			3.49048
			1.71378			3.48553
			1.83912			5.92328
			7.96798			8.72314
			12.5948			2.09324
			4.57814			2.49387
			1.55632			7.55086
			1.84689			2.05261
			4.22702			1.54068
			6.68987			3.59751
			3.09865			4.97435
			2.9034			3.97154
			2.32903			2.30763
			1.79177			2.97583
			4.13151			3.44327
			3.20335			1.09697
			1.93234			2.93003
			3.03803			2.45023
			6.16704			9.07051
			2.47453			1.85626
			2.61694			1.02692
			11.0489			2.36106
			2.03146			1.68076
			0.969208			1.87384
			1.62644			2.23949
			3.98187			5.84316
			2.90715			2.79292
			6.03414			1.37502
			4.42873			1.88692
			1.92			2.45419
			2.31601			2.5127
			1.59851			2.40034
			6.78391			6.74557
			5.48833			7.43597
			3.41096			3.24939
			1.60988			2.07456
			1.79369			10.7226
			3.57451			2.97585
			0.519779			3.49048
			2.77477			3.48553
			3.63582			5.92328
			3.25202			8.72314
			5.61014			2.09324
			3.10531			2.49387
			3.62273			7.55086
			13.0096			2.05261
			12.8531			1.54068
			4.89382			3.59751
			6.87971			4.97435
			2.68387			3.97154
			4.27354			2.30763
			1.36613			2.97583
			16.1445			3.02667
			2.50363			3.44327
			3.18598			1.09697
			5.47253			2.93003
			2.80779			2.45023
			4.20616			9.07051
			4.28996			1.85626
			2.50967			5.45209
			2.55885			1.02692
			6.43987			2.36106
			0.677879			1.68076
			3.99281			1.87384
			3.63139			2.23949
			1.52116			5.84316
			7.90754			3.75773
			12.34			2.79292
			10.9632			1.37502
			10.6664			1.88692
			5.42648			2.45419
			3.69879			2.5127
			8.16633			3.94231
			5.73072			2.40034
			6.93048			6.74557
			6.36318			3.68413
			12.0603			7.43597
			4.90702			3.24939
			6.30838			5.17836
			4.74766			2.07456
			6.34492			10.7226
			13.0094			4.88997
			10.6248			2.97585
			14.2437			3.49048
			1.94231			3.48553
			1.42119			5.92328
			3.81961			8.72314
			3.01632			2.09324
			8.82842			2.49387
			6.82872			7.55086
			1.95667			2.05261
			11.2541			1.54068
			4.19227			3.59751
			15.5338			4.97435
			3.22911			3.97154
			3.37079			2.30763
			1.27394			2.97583
			13.4256			3.02667
			1.48631			4.27245
			9.37826			3.44327
			7.06614			1.09697
			11.1668			2.93003
			6.00911			2.45023
			3.54554			9.07051
			26.9419			1.85626
			3.45448			5.45209
			1.71378			0.619148
			1.83912			1.02692
			7.96798			2.36106
			3.29029			1.68076
			12.5948			1.87384
			4.57814			2.23949
			1.55632			5.84316
			1.84689			3.75773
			4.22702			3.37857
			6.68987			2.79292
			3.09865			1.37502
			2.9034			1.88692
			2.32903			2.45419
			1.79177			2.5127
			4.13151			3.94231
			3.20335			2.40034
			1.93234			6.74557
			3.03803			3.68413
			6.16704			7.43597
			2.47453			3.24939
			2.61694			5.17836
			11.0489			2.07456
			2.03146			10.7226
			0.969208			4.88997
			1.62644			2.97585
			3.98187			3.49048
			2.90715			3.48553
			6.03414			5.92328
			4.42873			8.72314
			1.92			2.09324
			2.31601			2.49387
			1.59851			7.55086
			6.78391			2.05261
			5.48833			1.54068
			3.41096			3.59751
			1.60988			4.97435
			1.79369			3.97154
			3.57451			2.30763
			0.519779			2.97583
			2.77477			3.02667
			3.63582			4.27245
			3.25202			3.44327
			5.61014			1.09697
			3.10531			2.93003
			3.62273			2.45023
			13.0096			9.07051
			12.8531			1.85626
			4.89382			5.45209
			6.87971			0.619148
			2.68387			1.02692
			4.27354			2.36106
			1.36613			1.68076
			16.1445			1.87384
			2.50363			2.23949
			3.18598			5.84316
			5.47253			3.75773
			2.80779			3.37857
			4.20616			3.78255
			4.28996			2.79292
			2.50967			1.37502
			2.55885			1.88692
			6.43987			2.45419
			0.677879			2.5127
			3.99281			3.94231
			3.63139			3.83422
			1.52116			2.40034
			7.90754			6.74557
			12.34			3.68413
			10.9632			3.25529
			10.6664			7.43597
			5.42648			3.24939
			3.69879			5.17836
			8.16633			3.13476
			5.73072			2.07456
			6.93048			10.7226
			6.36318			4.88997
			12.0603			4.52352
			4.90702			2.97585
			6.30838			3.49048
			4.74766			3.48553
			6.34492			5.92328
			13.0094			8.72314
			10.6248			2.09324
[truncated: 767 more rows]
