# Supplementary material for: 3D directional tuning in the orofacial sensorimotor cortex during natural feeding and drinking
Source: eLife. 2025 Oct 21;13:RP101325. doi: 10.7554/eLife.101325 (PMC12539803; doi:10.7554/eLife.101325)
Supplement: Figure 10—figure supplement 1—source data 1. [file elife-101325-fig10-figsupp1-data1.xlsx]

## Sheet: Sheet1
Figure 10 - figure supplement 2 - Source Data 1
Effect of subsampling drinking trials with similar kinematics
Source Data
Full sample			Subsample
Monkey R			Monkey R
MIo	SIo		MIo	SIo
-32.4074	-12.987		-26.1468	-8.5366
Monkey Y			Monkey Y
MIo	SIo		MIo	SIo
-26.7717	-12.6582		-10.3896	-14.4928
