# Supplementary material for: 3D directional tuning in the orofacial sensorimotor cortex during natural feeding and drinking
Source: eLife. 2025 Oct 21;13:RP101325. doi: 10.7554/eLife.101325 (PMC12539803; doi:10.7554/eLife.101325)
Supplement: Figure 10—source data 1. [file elife-101325-fig10-data1.xlsx]

## Sheet: Sheet1
Figure 10 - Source Data 1
Figure 10A: Percentage of directionally tuned neurons
Feeding
Control			Nerve Block
	% tuned	ste		% tuned	ste
rM1	73.6842	5.83	rM1	31.0345	6.07
cM1	82.0896	2.7	cM1	65.7895	3.44
SIo(3a/3b)	40.7407	9.46	SIo(3a/3b)	27.7778	10.56
SIo(1/2)	56.0606	6.11	SIo(1/2)	33.3333	6.8
Drinking
Control			Nerve Block
	% tuned	ste		% tuned	ste
rM1	50	6.8	rM1	32.7586	6.16
cM1	71.9723	2.64	cM1	59.4937	3.19
SIo(3a/3b)	38.4615	9.46	SIo(3a/3b)	30	7.25
SIo(1/2)	66.6667	4.36	SIo(1/2)	40.5405	4.66
Statistics
Control vs. Nerve Block
Feeding
	chi-stat	p-value
rM1	20.9565	4.69825e-06
cM1	13.5452	0.000232882
SIo(3a/3b)	0.792026	0.373488
SIo(1/2)	5.04038	0.0247631
MIo	30.2093	3.87838e-08
SIo	5.52662	0.0187292
Drinking
	chi-stat	p-value
rM1	3.43465	0.0638423
cM1	9.08172	0.00258177
SIo(3a/3b)	0.628468	0.427918
SIo(1/2)	15.6495	7.62344e-05
MIo	13.7068	0.000213679
SIo	14.6835	0.000127156
