# Supplementary material for: 3D directional tuning in the orofacial sensorimotor cortex during natural feeding and drinking
Source: eLife. 2025 Oct 21;13:RP101325. doi: 10.7554/eLife.101325 (PMC12539803; doi:10.7554/eLife.101325)
Supplement: Figure 10—source data 2. [file elife-101325-fig10-data2.xlsx]

## Sheet: Sheet1
Figure 10 - Source Data 2
Figure 10B: Percentage of neurons which gained or lost directionality with the addition of nerve block
		Monkey R		Monkey Y
		MIo	SIo	MIo	SIo
Feeding	Lost	32/150 = 21.33%	5/26 = 19.23%	22/82 = 26.83%	13/33 = 39.39%
	Gained	14/150 = 9.333%	4/26 = 15.38%	2/82 = 2.439%	3/33 = 9.09%
	No change	104/150 = 69.33%	17/26 = 65.38%	58/82 = 70.73%	17/33 = 51.52%
		MIo	SIo	MIo	SIo
Drinking	Lost	50/207 = 24.15%	27/77 = 35.06%	11/53 = 20.75%	10/62 = 16.13%
	Gained	29/207 = 14.01%	6/77 = 7.79%	9/53 = 16.98%	24/62 = 38.71%
	No change	128 / 207 = 61.84%	44/77 = 57.14%	33/53 = 62.23%	28/62 = 45.16%
Statistics
p-values (determined using Chi-square)
Behavior: Feeding vs. Drinking				Region: MIo vs SIo
	MIo	SIo			Monkey R		Monkey Y			lost & gained
R	0.2681	0.2293			lost	gained	lost	gained		Monkey R	Monkey Y
Y	0.0101	0.003		Feeding	0.8081	0.3472	0.1853	0.1136		0.6407	0.0843
				Drinking	0.00206494	0.156484	0.522168	0.0102		0.061	0.037
Animal: Monkey R vs. Monkey Y
	MIo	SIo
Feeding	0.1132	0.2335
Drinking	0.79	5.5e-05
