# Supplementary material for: 3D directional tuning in the orofacial sensorimotor cortex during natural feeding and drinking
Source: eLife. 2025 Oct 21;13:RP101325. doi: 10.7554/eLife.101325 (PMC12539803; doi:10.7554/eLife.101325)
Supplement: Figure 11—source data 1. [file elife-101325-fig11-data1.xlsx]

## Sheet: Sheet1
Figure 11 - Source Data 1
Figure 11A: Comparison of preferred left-right directions in control and nerve block during feeding
Summary Statistics
	Monkey R				Monkey Y
	MIo		SIo		MIo		SIo
	Control	Nerve Block	Control	Nerve Block	Control	Nerve Block	Control	Nerve Block
mean	-0.0825	-0.0397	0.1903	-0.2182	-0.122	-0.0146	-0.0339	-0.0729
median	-0.0873	-0.0873	0.0873	-0.2618	-0.2618	-0.0873	-0.0873	-0.2618
var	0.0436	0.0242	0.0465	0.0029	0.0465	0.0231	0.0333	0.0315
std	0.2953	0.2201	0.3051	0.0755	0.3049	0.2149	0.2582	0.251
std0	0.2986	0.2215	0.3087	0.0756	0.3085	0.2162	0.2604	0.253
skewness	-0.0173	-0.00019432	0.0184	-0.00049748	-0.0141	0.001	-0.0101	-0.009
skewness0	13.1757	18.9946	-28.7255	2740.3	18.4495	7.8768	8.0581	21.2023
kurtosis	0.8339	0.9054	0.8221	0.9886	0.8222	0.9092	0.8717	0.8766
kurtosis0	-1.5091	-1.9629	-1.9982	-1.3143	-2.0429	-2.8321	-1.3372	-3.2111
k-test	f	p-value	f	p-value	f	p-value	f	p-value
	1.80076	0.00162551	13.1761	0.0232	2.0004	0.0084	1.0152	0.163
Source data
Monkey R					Monkey Y					*bin numbers corresponding to ranges of degrees
MIo		SIo			MIo		SIo			1	-30:-20
Control	Nerve Block	Control	Nerve Block		Control	Nerve Block	Control	Nerve Block		2	-20:-10
6	2	2	3		3	5	3	2		3	-10:0
3	2	3	2		3	4	4	2		4	0:10
3	3	4	2		1	5	4	5		5	10:20
6	3	3	2		1	2	1	5		6	20:30
3	5	3			4	2	6	5
3	3	6			4	5	2	5
2	3	6			1	2	6	2
2	5	6			1	2	5	2
3	3	6			6	2	2	2
6	3	6			4	2	2	2
4	2	6			6	3	3	2
4	2	6			1	4	2
2	4	6			2	5	2
6	2	1			6	2	4
3	4				1	5	3
4	5				2	5	6
2	4				2	4	5
2	3				5	3	3
3	3				6	5	3
1	5				4	5
6	1				6	5
6	4				4	3
6	2				4	1
2	3				1	2
4	3				2	2
2	2				1	4
2	1				2	4
1	2				4	3
1	2				6	5
1	3				4	2
1	1				1	3
1	3				4	5
2	4				1	2
2	3				1	4
3	3				1	4
3	3				1	4
2	5				1	2
2	4				1	2
2	3				1	2
2	4				1	2
2	5				4	4
1	2				1	5
2	5				1	4
1	5				1	4
1	1				4	4
6	1				4	4
1	5				2	4
3	2				2	4
4	4				4	4
2	2				1	5
1	4				6	2
2	4				5	2
3	3				2	2
2	3				1
3	4				1
4	4				3
2	4				2
4	3				3
6	5				2
6	5				3
6	5				2
2	2				5
2	3				5
1	1				2
2	2				6
3	3				2
2	2				1
6	2				6
1	5				3
6	5				2
2	3				2
2	3				4
2	2				1
5	4				1
2	4				5
2	5				5
2	1
5	2
2	2
2	4
2	3
4	2
6	3
3	3
1	4
2	5
4	4
3	5
1	3
2	4
6	3
6	5
3	3
6	1
6	2
6	5
6	5
1	3
1	2
3	5
4	4
3	6
4	2
5	3
6	2
2	5
2	5
1	3
3	3
2	2
2	2
2	4
	5
	5
	3
	1
	4
	5
	2
	5
	2
