# Supplementary material for: 3D directional tuning in the orofacial sensorimotor cortex during natural feeding and drinking
Source: eLife. 2025 Oct 21;13:RP101325. doi: 10.7554/eLife.101325 (PMC12539803; doi:10.7554/eLife.101325)
Supplement: Figure 11—source data 2. [file elife-101325-fig11-data2.xlsx]

## Sheet: Sheet1
Figure 11 - Source Data 2
Figure 11B: Comparison of preferred directions in control and nerve block during drinking
Statistics
Control vs. Nerve Block
	MIo		SIo
	chi-stat	p-value	chi-stat	p-value
Monkey R	3.38505	0.184055	8.25558	0.0161185
Monkey Y	6.53828	0.0380391	0.982918	0.611733
Source data
MIo Monkey R							SIo Monkey R
Control			Nerve Block				Control			Nerve Block
	proportion	ste		proportion	ste			proportion	ste		proportion	ste
Left	0.367	0.032795	Left	0.472	0.0357496		Left	0.03448	0.023958	Left	0.147	0.0607
Middle	0.18	0.02614	Middle	0.23	0.030136		Middle	0.5	0.06565	Middle	0.235	0.0727
Right	0.45	0.03385	Right	0.29	0.03249		Right	0.448	0.065297	Right	0.6176	0.08334
MIo Monkey Y							SIo Monkey Y
Control			Nerve Block				Control			Nerve Block
	proportion	ste		proportion	ste			proportion	ste		proportion	ste
Left	0.608696	0.58753	Left	0.419	0.0886		Left	0.41176	0.0844	Left	0.3043	0.0959
Middle	0.101449	0.036347	Middle	0.032258	0.031733		Middle	0.20588	0.069344	Middle	0.21739	0.086
Right	0.289855	0.0379337	Right	0.548387	0.0893879		Right	0.3529	0.08195	Right	0.47826	0.10415
Monkey R					Monkey Y					*numbers corresponding to directions
MIo		SIo			MIo		SIo			1	Left
Control	Nerve Block	Control	Nerve Block		Control	Nerve Block	Control	Nerve Block		2	Middle
2	1	2	3		3	3	2	3		3	Right
2	1	2	2		2	1	1	1
1	1	3	3		3	3	2	3
3	1	2	1		3	3	1	2
1	1	1	2		1	3	1	3
1	2	3	2		1	3	3	1
1	3	1	3		1	3	1	3
1	2	2	3		3	3	1	3
3	2	2	1		3	3	2	2
3	1	3	1		1	3	3	2
3	1	2	1		1	3	1	2
1	3	2	1		1	3	3	3
3	1	3	2		1	1	2	1
2	1	2	3		1	3	2	1
1	1	2	2		1	3	2	3
1	1	2	3		1	3	1	1
3	2	2	3		1	1	3	1
1	3	3	3		3	1	3	3
1	3	3	2		1	1	1	3
1	2	2	3		1	2	3	1
1	1	3	3		1	1	3	2
3	1	2	3		1	1	3	3
3	2	2	2		1	1	1	3
2	2	3	3		1	3	3
3	2	2	2		1	1	2
2	2	2	3		1	3	1
1	3	2	3		3	1	3
3	1	3	3		3	1	1
1	1	3	3		2	3	1
1	1	2	3		1	1	3
2	2	2	3		1	1	3
2	2	2	3		2		1
1	3	3	3		1		2
2	2	2	3		1		1
1	3	2			1
1	1	3			1
1	2	3			3
1	2	3			1
3	1	3			3
2	1	2			1
3	3	3			3
3	2	2			2
3	3	2			1
2	3	3			3
1	3	3			3
2	3	3			2
2	2	3			3
3	2	3			3
1	2	3			1
1	3	3			2
3	2	3			3
1	1	3			3
3	1	2			1
2	1	2			1
3	1	2			1
3	2	2			1
3	2	3			1
3	3	3			1
1	2				1
3	3				3
2	1				3
3	3				1
1	3				1
2	2				1
2	1				1
1	1				1
3	1				1
3	1				2
1	1				3
1	2
3	1
1	3
3	3
2	1
2	3
3	1
1	1
1	1
3	3
2	3
1	3
3	3
1	2
1	3
3	2
1	2
1	1
1	2
1	2
1	2
3	1
3	1
1	1
2	1
3	1
1	1
2	2
1	2
2	3
2	3
3	1
3	2
3	1
3	3
1	1
3	2
2	3
3	1
2	3
3	1
1	3
1	3
2	1
3	3
2	1
3	3
1	1
2	1
3	1
1	1
1	1
1	1
3	3
3	3
1	3
1	3
3	1
3
3
3
1
1
2
3
1
1
3
1
1
3
3
2
3
2
3
1
3
3
1
3
3
1
1
3
1
1
1
1
1
3
2
3
3
2
3
