# Supplementary material for: 3D directional tuning in the orofacial sensorimotor cortex during natural feeding and drinking
Source: eLife. 2025 Oct 21;13:RP101325. doi: 10.7554/eLife.101325 (PMC12539803; doi:10.7554/eLife.101325)
Supplement: Figure 12—source data 1. [file elife-101325-fig12-data1.xlsx]

## Sheet: Sheet1
Figure 12 - Source Data 1
Effect of nerve block on population trajectories
Summary Statistics
Control vs. Nerve Block
	Monkey R									Monkey Y
	Feeding				Drinking					Feeding				Drinking
	MIo		SIo		MIo		SIo			MIo		SIo		MIo		SIo
(± 1SD)	Control	Nerve Block	Control	Nerve Block	Control	Nerve Block	Control	Nerve Block		Control	Nerve Block	Control	Nerve Block	Control	Nerve Block	Control	Nerve Block
avg inter-traj dist	0.9389 ± 0.0258	0.6867 ± 0.0169	0.1411 ± 0.0079	0.7733 ± 0.0216	0.9678 ± 0.1408	0.7448 ± 0.1275	0.1468 ± 0.0409	0.1429 ± 0.0191		0.6741 ± 0.0151	0.5522 ± 0.0244	0.3018 ± 0.0272	0.4040 ± 0.0079	0.5346 ± 0.0631	0.2571 ± 0.0713	0.4145 ± 0.0829	0.3038 ± 0.0683
distnace travelled	1.14468 ± 0.3112	1.0332 ± 0.43598	0.2579 ± 0.08698	1.65397 ± 0.0476	8.2424 ± 1.5702	8.0236 ± 2.7795	2.1412 ± 0.8649	2.5314 ± 1.0528		0.786339 ± 0.2327	1.0878 ± 0.6187	0.72287 ± 0.2541	0.9459 ± 0.5024	7.275 ± 0.68645	3.4619 ± 0.48526	6.6445 ± 0.5489	5.2138 ± 0.4998
t-test p-values	inter-traj (% < 0.05)	distance travelled	inter-traj (% < 0.05)	distance travelled	inter-traj (% < 0.05)	distance travelled	inter-traj (% < 0.05)	distance travelled		inter-traj (% < 0.05)	distance travelled	inter-traj (% < 0.05)	distance travelled	inter-traj (% < 0.05)	distance travelled	inter-traj (% < 0.05)	distance travelled
	0.9286	0.6272	1	0.00075334	1	0.9112	0.666666	0.6459		0.8929	0.218	0.75	0.2814	1	0.0014	1	0.0289
Anterior-Posterior pairs vs. Others
	Monkey R					Monkey Y
	MIo		SIo			MIo		SIo
(± 1SD)	Control	Nerve Block	Control	Nerve Block		Control	Nerve Block	Control	Nerve Block
ant-post dist	0.4768 ± 0.1219	0.3884 ± 0.0972	0.0966 ± 0.0243	0.5269 ± 0.0473		0.3512 ± 0.0992	0.3890 ± 0.1075	0.1693 ± 0.0451	0.3169 ± 0.0531
others dist	1.0160 ± 0.1666	0.7365 ± 0.1248	0.1485 ± 0.0407	0.8143 ± 0.1205		0.7279 ± 0.1516	0.5794 ± 0.1581	0.3239 ± 0.0861	0.4185 ± 0.1010
t-test p-values	2.45494e-06	4.01257e-05	0.0251594	9.91349e-05		0.000186355	0.0237458	0.00286206	0.0807234
Source data (mean inter-trajectory distances over time)
Feeding				Drinking
MIo		SIo		MIo		SIo
Control	Nerve Block	Control	Nerve Block	Control	Nerve Block	Control	Nerve Block
0.396945	0.329965	0.143041	0.324929	0.369034	0.861812	0.143079	0.16098
0.400501	0.284038	0.141039	0.280385	0.367794	0.813185	0.12693	0.135705
0.404013	0.277224	0.138325	0.268848	0.348805	0.77515	0.107668	0.132833
0.405541	0.269457	0.131931	0.258208	0.304978	0.75214	0.117576	0.12927
0.403499	0.265888	0.130852	0.256802	0.274944	0.759947	0.12438	0.130226
0.391343	0.266551	0.134744	0.261008	0.291608	0.760239	0.11051	0.150384
0.374762	0.271984	0.138919	0.265044	0.341045	0.743917	0.0931014	0.150701
0.362322	0.264086	0.147024	0.255495	0.363175	0.689279	0.102469	0.137248
0.359791	0.276903	0.150824	0.267776	0.343204	0.673998	0.115554	0.143301
0.370648	0.324165	0.154631	0.312898	0.319035	0.694478	0.117405	0.150582
				0.299725	0.713111	0.128221	0.154382
				0.290815	0.72218	0.140223	0.167834
				0.295119	0.708185	0.139671	0.166133
				0.292735	0.689399	0.137399	0.155433
				0.287512	0.660255	0.13742	0.156767
				0.29719	0.640147	0.133323	0.147999
				0.315748	0.630346	0.131468	0.147988
				0.337611	0.61737	0.142824	0.147648
				0.333093	0.604132	0.171965	0.154616
				0.301049	0.577008	0.204611	0.155764
				0.267997	0.533706	0.208937	0.130476
				0.24108	0.529296	0.189775	0.130395
				0.227366	0.541491	0.157402	0.132164
				0.235163	0.554344	0.132728	0.123113
				0.224846	0.59305	0.12026	0.107754
				0.220055	0.595574	0.100439	0.0994502
				0.226854	0.570805	0.100963	0.104935
				0.223839	0.59168	0.0996743	0.121998
				0.217834	0.662722	0.0817594	0.139266
				0.220045	0.681443	0.0792052	0.144268
				0.226117	0.693551	0.0941834	0.14058
				0.242238	0.721426	0.0822996	0.131724
				0.245606	0.755304	0.0586752	0.125534
				0.248357	0.789555	0.0502591	0.128591
				0.262742	0.837112	0.0591888	0.144716
				0.274965	0.882527	0.0648502	0.171614
				0.28952	0.916028	0.055518	0.192877
				0.298702	0.929014	0.0603928	0.173436
				0.294615	0.929273	0.06115	0.14024
				0.303965	0.926601	0.058723	0.127816
				0.317154	0.918503	0.0669074	0.121746
				0.325915	0.924586	0.0829887	0.122567
				0.332848	0.920682	0.0813159	0.145348
				0.340468	0.916465	0.0770055	0.142212
				0.341966	0.886445	0.0737255	0.130972
				0.346654	0.854583	0.0730915	0.131239
				0.350328	0.864181	0.0758494	0.150008
				0.338786	0.869225	0.0869759	0.170138
				0.346724	0.866263	0.0955465	0.166636
				0.368216	0.899287	0.0932003	0.179468
