# Supplementary material for: 3D directional tuning in the orofacial sensorimotor cortex during natural feeding and drinking
Source: eLife. 2025 Oct 21;13:RP101325. doi: 10.7554/eLife.101325 (PMC12539803; doi:10.7554/eLife.101325)
Supplement: Figure 13—figure supplement 2—source data 1. [file elife-101325-fig13-figsupp2-data1.xlsx]

## Sheet: Sheet1
Figure 13 - figure supplement 2 - Source Data 1
KNN decoding accuracies from neuronal populations of various sizes
	Decoding Accuracies																	Linear regression model with interactions
	Feeding R Control		Feeding R Nerve Block		Feeding Y Control		Feeding Y Nerve Block		Drinking R Control		Drinking R Nerve Block		Drinking Y Control		Drinking Y Nerve Block			Independent variables	Coefficient	ste	t-stat	p-value
	MIo	SIo	MIo	SIo	MIo	SIo	MIo	SIo	MIo	SIo	MIo	SIo	MIo	SIo	MIo	SIo		Animal	0.155838	0.642782	0.242443	0.808468
	59.2593	44.4444	59.2593	22.2222	44.4444	44.4444	55.5556	25.9259	82.8947	61.8421	79.1045	64.1791	53.4483	50	48.6486	51.3514		Behavior	19.6952	0.642782	30.6406	2.10766e-162
	74.0741	44.4444	62.963	51.8519	62.963	40.7407	55.5556	40.7407	84.2105	65.7895	74.6269	64.1791	56.8966	50	43.2432	45.9459		Condition	-1.01724	0.642782	-1.58256	0.11372
	55.5556	29.6296	74.0741	25.9259	55.5556	51.8519	40.7407	29.6296	76.3158	60.5263	74.6269	61.194	62.069	51.7241	41.8919	39.1892		Region	-13.2356	0.642782	-20.5911	1.06826e-83
	62.963	37.037	66.6667	22.2222	74.0741	37.037	48.1481	37.037	72.3684	60.5263	80.597	74.6269	63.7931	43.1034	47.2973	41.8919		Animal:Behavior	-16.6658	0.642782	-25.9276	6.74143e-124
	74.0741	37.037	62.963	29.6296	51.8519	33.3333	62.963	29.6296	76.3158	57.8947	83.5821	59.7015	65.5172	55.1724	45.9459	44.5946		Animal:Condition	-3.08253	0.642782	-4.7956	1.77369e-06
	70.3704	37.037	48.1481	25.9259	70.3704	37.037	48.1481	25.9259	80.2632	59.2105	76.1194	64.1791	65.5172	48.2759	58.1081	45.9459		Animal:Region	2.70604	0.642782	4.20988	2.69813e-05
	59.2593	29.6296	77.7778	44.4444	33.3333	44.4444	40.7407	25.9259	77.6316	57.8947	79.1045	58.209	58.6207	46.5517	47.2973	51.3514		Behavior:Condition	-0.158781	0.642782	-0.247022	0.804923
	62.963	44.4444	59.2593	33.3333	66.6667	44.4444	55.5556	33.3333	77.6316	59.2105	76.1194	73.1343	63.7931	55.1724	37.8378	43.2432		Behavior:Region	4.36852	0.642782	6.79626	1.51371e-11
	70.3704	40.7407	55.5556	29.6296	70.3704	48.1481	29.6296	33.3333	76.3158	56.5789	73.1343	59.7015	58.6207	44.8276	52.7027	45.9459		Condition:Region	4.77442	0.642782	7.42774	1.79421e-13
	74.0741	40.7407	59.2593	44.4444	48.1481	51.8519	59.2593	33.3333	71.0526	64.4737	80.597	59.7015	74.1379	39.6552	40.5405	37.8378		Constant	47.6041
	55.5556	40.7407	55.5556	48.1481	51.8519	44.4444	48.1481	37.037	88.1579	56.5789	71.6418	55.2239	55.1724	41.3793	50	43.2432		R2 = 0.701389273396268
	62.963	44.4444	59.2593	48.1481	55.5556	48.1481	66.6667	33.3333	77.6316	61.8421	82.0896	68.6567	55.1724	43.1034	55.4054	52.7027		F-ratio = 376.579759279356
	62.963	40.7407	59.2593	33.3333	59.2593	37.037	29.6296	18.5185	82.8947	50	76.1194	58.209	58.6207	46.5517	41.8919	44.5946		n = 1600
	81.4815	37.037	62.963	25.9259	62.963	29.6296	55.5556	29.6296	78.9474	56.5789	79.1045	62.6866	63.7931	46.5517	44.5946	40.5405
	62.963	25.9259	59.2593	44.4444	81.4815	40.7407	48.1481	33.3333	76.3158	60.5263	77.6119	58.209	51.7241	44.8276	48.6486	48.6486		Input table
	51.8519	51.8519	92.5926	33.3333	62.963	37.037	44.4444	48.1481	76.3158	60.5263	82.0896	62.6866	58.6207	55.1724	51.3514	40.5405		Animal	Behavior	Condition	Region	Accuracy
	66.6667	48.1481	85.1852	33.3333	62.963	40.7407	44.4444	33.3333	84.2105	69.7368	74.6269	61.194	70.6897	60.3448	40.5405	45.9459		'R'	'F'	'C'	'M1'	37.037
	55.5556	44.4444	51.8519	37.037	62.963	33.3333	55.5556	40.7407	77.6316	43.4211	82.0896	62.6866	50	46.5517	48.6486	43.2432		'R'	'F'	'C'	'M1'	44.4444
	70.3704	55.5556	44.4444	22.2222	51.8519	48.1481	48.1481	44.4444	75	60.5263	64.1791	58.209	58.6207	51.7241	45.9459	52.7027		'R'	'F'	'C'	'M1'	46.2963
	66.6667	37.037	62.963	29.6296	74.0741	37.037	44.4444	29.6296	80.2632	59.2105	86.5672	71.6418	68.9655	43.1034	45.9459	51.3514		'R'	'F'	'C'	'M1'	40.7407
	70.3704	51.8519	81.4815	37.037	40.7407	44.4444	70.3704	29.6296	77.6316	59.2105	70.1493	58.209	65.5172	48.2759	51.3514	58.1081		'R'	'F'	'C'	'M1'	46.2963
	85.1852	44.4444	70.3704	25.9259	55.5556	40.7407	59.2593	51.8519	81.5789	64.4737	76.1194	58.209	62.069	51.7241	52.7027	54.0541		'R'	'F'	'C'	'M1'	37.037
	66.6667	25.9259	70.3704	44.4444	48.1481	44.4444	40.7407	55.5556	80.2632	57.8947	85.0746	71.6418	51.7241	50	45.9459	51.3514		'R'	'F'	'C'	'M1'	46.2963
	66.6667	51.8519	74.0741	37.037	48.1481	25.9259	44.4444	40.7407	76.3158	68.4211	71.6418	65.6716	65.5172	51.7241	40.5405	36.4865		'R'	'F'	'C'	'M1'	38.8889
	70.3704	55.5556	48.1481	29.6296	55.5556	44.4444	48.1481	33.3333	73.6842	61.8421	76.1194	59.7015	60.3448	50	47.2973	43.2432		'R'	'F'	'C'	'M1'	53.7037
	70.3704	37.037	85.1852	33.3333	74.0741	44.4444	37.037	33.3333	93.4211	63.1579	79.1045	70.1493	51.7241	50	50	52.7027		'R'	'F'	'C'	'M1'	38.8889
	62.963	25.9259	66.6667	40.7407	48.1481	22.2222	48.1481	37.037	85.5263	64.4737	86.5672	62.6866	53.4483	46.5517	51.3514	48.6486		'R'	'F'	'C'	'M1'	51.8519
	48.1481	29.6296	66.6667	29.6296	40.7407	40.7407	59.2593	44.4444	86.8421	69.7368	79.1045	65.6716	51.7241	48.2759	47.2973	52.7027		'R'	'F'	'C'	'M1'	68.5185
	70.3704	44.4444	59.2593	11.1111	74.0741	33.3333	25.9259	37.037	82.8947	57.8947	74.6269	61.194	51.7241	39.6552	45.9459	39.1892		'R'	'F'	'C'	'M1'	37.037
	66.6667	33.3333	55.5556	37.037	51.8519	44.4444	59.2593	22.2222	78.9474	67.1053	77.6119	62.6866	60.3448	56.8966	54.0541	50		'R'	'F'	'C'	'M1'	55.5556
	55.5556	29.6296	55.5556	29.6296	55.5556	51.8519	44.4444	51.8519	81.5789	51.3158	82.0896	61.194	62.069	43.1034	51.3514	36.4865		'R'	'F'	'C'	'M1'	48.1481
	66.6667	44.4444	55.5556	29.6296	48.1481	59.2593	48.1481	51.8519	85.5263	63.1579	67.1642	53.7313	60.3448	37.931	41.8919	40.5405		'R'	'F'	'C'	'M1'	48.1481
	66.6667	40.7407	77.7778	55.5556	40.7407	25.9259	44.4444	33.3333	80.2632	56.5789	73.1343	62.6866	51.7241	53.4483	51.3514	54.0541		'R'	'F'	'C'	'M1'	40.7407
	66.6667	44.4444	48.1481	29.6296	33.3333	44.4444	66.6667	33.3333	80.2632	68.4211	67.1642	49.2537	60.3448	60.3448	44.5946	50		'R'	'F'	'C'	'M1'	44.4444
	66.6667	37.037	66.6667	37.037	74.0741	37.037	59.2593	33.3333	77.6316	67.1053	73.1343	58.209	55.1724	58.6207	48.6486	50		'R'	'F'	'C'	'M1'	53.7037
	62.963	40.7407	51.8519	37.037	59.2593	37.037	55.5556	40.7407	80.2632	63.1579	70.1493	65.6716	68.9655	55.1724	45.9459	55.4054		'R'	'F'	'C'	'M1'	48.1481
	55.5556	55.5556	70.3704	37.037	48.1481	37.037	51.8519	44.4444	81.5789	65.7895	82.0896	64.1791	44.8276	53.4483	47.2973	48.6486		'R'	'F'	'C'	'M1'	38.8889
	62.963	48.1481	59.2593	33.3333	62.963	37.037	59.2593	29.6296	73.6842	60.5263	68.6567	55.2239	60.3448	62.069	43.2432	41.8919		'R'	'F'	'C'	'M1'	33.3333
	51.8519	59.2593	70.3704	33.3333	55.5556	37.037	51.8519	37.037	86.8421	56.5789	82.0896	65.6716	62.069	60.3448	47.2973	56.7568		'R'	'F'	'C'	'M1'	48.1481
	59.2593	37.037	66.6667	25.9259	55.5556	48.1481	40.7407	33.3333	82.8947	61.8421	82.0896	61.194	58.6207	56.8966	45.9459	52.7027		'R'	'F'	'C'	'M1'	42.5926
	59.2593	33.3333	59.2593	44.4444	40.7407	40.7407	55.5556	37.037	81.5789	68.4211	76.1194	59.7015	60.3448	50	43.2432	40.5405		'R'	'F'	'C'	'M1'	48.1481
	62.963	44.4444	77.7778	37.037	59.2593	29.6296	48.1481	55.5556	78.9474	57.8947	74.6269	58.209	60.3448	48.2759	55.4054	48.6486		'R'	'F'	'C'	'M1'	62.963
	62.963	51.8519	66.6667	33.3333	70.3704	25.9259	44.4444	40.7407	75	56.5789	68.6567	53.7313	46.5517	55.1724	52.7027	44.5946		'R'	'F'	'C'	'M1'	46.2963
	66.6667	51.8519	62.963	37.037	51.8519	33.3333	66.6667	48.1481	73.6842	65.7895	74.6269	65.6716	51.7241	53.4483	56.7568	54.0541		'R'	'F'	'C'	'M1'	44.4444
	62.963	40.7407	74.0741	40.7407	66.6667	48.1481	40.7407	40.7407	78.9474	56.5789	76.1194	58.209	70.6897	44.8276	41.8919	43.2432		'R'	'F'	'C'	'M1'	51.8519
	77.7778	44.4444	66.6667	37.037	55.5556	44.4444	25.9259	37.037	78.9474	56.5789	79.1045	56.7164	46.5517	44.8276	47.2973	45.9459		'R'	'F'	'C'	'M1'	40.7407
	59.2593	44.4444	66.6667	29.6296	59.2593	48.1481	40.7407	18.5185	82.8947	60.5263	77.6119	61.194	55.1724	48.2759	48.6486	54.0541		'R'	'F'	'C'	'M1'	46.2963
	62.963	18.5185	59.2593	22.2222	59.2593	40.7407	40.7407	29.6296	82.8947	52.6316	91.0448	68.6567	41.3793	48.2759	40.5405	44.5946		'R'	'F'	'C'	'M1'	57.4074
	70.3704	25.9259	55.5556	37.037	40.7407	44.4444	62.963	44.4444	84.2105	65.7895	82.0896	68.6567	70.6897	39.6552	51.3514	41.8919		'R'	'F'	'C'	'M1'	42.5926
	55.5556	40.7407	59.2593	40.7407	62.963	29.6296	33.3333	44.4444	80.2632	65.7895	86.5672	67.1642	63.7931	51.7241	43.2432	56.7568		'R'	'F'	'C'	'M1'	46.2963
	66.6667	37.037	70.3704	25.9259	59.2593	44.4444	40.7407	37.037	80.2632	53.9474	77.6119	64.1791	65.5172	55.1724	55.4054	44.5946		'R'	'F'	'C'	'M1'	40.7407
	37.037	33.3333	62.963	40.7407	51.8519	22.2222	40.7407	48.1481	77.6316	57.8947	73.1343	64.1791	60.3448	48.2759	45.9459	39.1892		'R'	'F'	'C'	'M1'	33.3333
	59.2593	33.3333	59.2593	37.037	51.8519	51.8519	37.037	44.4444	75	51.3158	76.1194	61.194	53.4483	55.1724	40.5405	45.9459		'R'	'F'	'C'	'M1'	46.2963
	74.0741	48.1481	59.2593	22.2222	70.3704	51.8519	44.4444	55.5556	75	56.5789	71.6418	61.194	56.8966	44.8276	56.7568	52.7027		'R'	'F'	'C'	'M1'	42.5926
	55.5556	48.1481	66.6667	29.6296	48.1481	33.3333	37.037	25.9259	82.8947	56.5789	76.1194	65.6716	46.5517	62.069	56.7568	48.6486		'R'	'F'	'C'	'M1'	59.2593
	70.3704	51.8519	55.5556	33.3333	44.4444	40.7407	33.3333	29.6296	71.0526	64.4737	77.6119	62.6866	56.8966	48.2759	45.9459	45.9459		'R'	'F'	'C'	'M1'	44.4444
	74.0741	33.3333	59.2593	25.9259	40.7407	44.4444	33.3333	44.4444	69.7368	51.3158	79.1045	61.194	62.069	60.3448	44.5946	37.8378		'R'	'F'	'C'	'M1'	44.4444
	70.3704	33.3333	62.963	51.8519	59.2593	40.7407	40.7407	18.5185	84.2105	57.8947	80.597	56.7164	62.069	48.2759	40.5405	36.4865		'R'	'F'	'C'	'M1'	61.1111
	62.963	55.5556	59.2593	25.9259	74.0741	29.6296	59.2593	33.3333	80.2632	56.5789	73.1343	55.2239	53.4483	44.8276	52.7027	51.3514		'R'	'F'	'C'	'M1'	40.7407
	62.963	55.5556	62.963	37.037	48.1481	25.9259	48.1481	25.9259	78.9474	56.5789	67.1642	56.7164	50	48.2759	47.2973	45.9459		'R'	'F'	'C'	'M1'	37.037
	55.5556	44.4444	51.8519	44.4444	62.963	37.037	40.7407	48.1481	80.2632	64.4737	80.597	67.1642	53.4483	43.1034	43.2432	45.9459		'R'	'F'	'C'	'M1'	55.5556
	66.6667	48.1481	70.3704	22.2222	59.2593	37.037	51.8519	40.7407	78.9474	60.5263	77.6119	58.209	60.3448	48.2759	51.3514	55.4054		'R'	'F'	'C'	'M1'	50
	59.2593	37.037	55.5556	22.2222	66.6667	40.7407	62.963	40.7407	77.6316	53.9474	70.1493	56.7164	51.7241	46.5517	52.7027	51.3514		'R'	'F'	'C'	'M1'	51.8519
	62.963	40.7407	66.6667	37.037	77.7778	29.6296	51.8519	40.7407	77.6316	67.1053	86.5672	67.1642	67.2414	36.2069	44.5946	48.6486		'R'	'F'	'C'	'M1'	40.7407
	59.2593	33.3333	77.7778	29.6296	48.1481	44.4444	48.1481	22.2222	84.2105	57.8947	80.597	67.1642	60.3448	55.1724	40.5405	47.2973		'R'	'F'	'C'	'M1'	44.4444
	77.7778	40.7407	59.2593	29.6296	48.1481	29.6296	44.4444	40.7407	69.7368	47.3684	82.0896	64.1791	62.069	48.2759	39.1892	50		'R'	'F'	'C'	'M1'	55.5556
	55.5556	40.7407	66.6667	18.5185	40.7407	40.7407	48.1481	29.6296	73.6842	55.2632	80.597	70.1493	63.7931	60.3448	55.4054	43.2432		'R'	'F'	'C'	'M1'	50
	55.5556	48.1481	74.0741	48.1481	66.6667	25.9259	51.8519	40.7407	77.6316	53.9474	74.6269	58.209	51.7241	43.1034	58.1081	47.2973		'R'	'F'	'C'	'M1'	51.8519
	51.8519	51.8519	55.5556	25.9259	59.2593	40.7407	37.037	33.3333	67.1053	53.9474	73.1343	61.194	56.8966	48.2759	48.6486	45.9459		'R'	'F'	'C'	'M1'	37.037
	70.3704	44.4444	81.4815	44.4444	48.1481	51.8519	48.1481	44.4444	76.3158	60.5263	77.6119	55.2239	55.1724	51.7241	55.4054	63.5135		'R'	'F'	'C'	'M1'	61.1111
	70.3704	51.8519	62.963	48.1481	40.7407	51.8519	48.1481	33.3333	76.3158	64.4737	80.597	68.6567	53.4483	44.8276	60.8108	52.7027		'R'	'F'	'C'	'M1'	55.5556
	62.963	62.963	51.8519	25.9259	59.2593	37.037	48.1481	29.6296	84.2105	68.4211	83.5821	76.1194	58.6207	46.5517	45.9459	37.8378		'R'	'F'	'C'	'M1'	37.037
	81.4815	44.4444	66.6667	40.7407	55.5556	44.4444	48.1481	40.7407	82.8947	60.5263	77.6119	67.1642	65.5172	55.1724	47.2973	43.2432		'R'	'F'	'C'	'M1'	51.8519
	59.2593	44.4444	66.6667	44.4444	51.8519	25.9259	40.7407	25.9259	77.6316	59.2105	86.5672	73.1343	63.7931	44.8276	47.2973	55.4054		'R'	'F'	'C'	'M1'	50
	62.963	33.3333	59.2593	40.7407	51.8519	44.4444	51.8519	48.1481	82.8947	65.7895	74.6269	58.209	58.6207	53.4483	58.1081	54.0541		'R'	'F'	'C'	'M1'	44.4444
	70.3704	44.4444	48.1481	29.6296	48.1481	25.9259	48.1481	33.3333	78.9474	67.1053	77.6119	68.6567	62.069	48.2759	43.2432	33.7838		'R'	'F'	'C'	'M1'	40.7407
	62.963	33.3333	77.7778	48.1481	62.963	37.037	51.8519	29.6296	78.9474	53.9474	85.0746	71.6418	63.7931	48.2759	47.2973	50		'R'	'F'	'C'	'M1'	55.5556
	59.2593	51.8519	59.2593	37.037	70.3704	33.3333	55.5556	33.3333	77.6316	50	73.1343	62.6866	53.4483	48.2759	37.8378	44.5946		'R'	'F'	'C'	'M1'	44.4444
	66.6667	48.1481	70.3704	48.1481	51.8519	44.4444	44.4444	37.037	80.2632	63.1579	62.6866	56.7164	53.4483	44.8276	51.3514	47.2973		'R'	'F'	'C'	'M1'	48.1481
	55.5556	62.963	62.963	29.6296	62.963	33.3333	44.4444	40.7407	78.9474	55.2632	77.6119	56.7164	60.3448	43.1034	47.2973	50		'R'	'F'	'C'	'M1'	42.5926
	66.6667	51.8519	62.963	18.5185	44.4444	48.1481	51.8519	33.3333	80.2632	60.5263	82.0896	64.1791	56.8966	55.1724	36.4865	40.5405		'R'	'F'	'C'	'M1'	37.037
	74.0741	44.4444	70.3704	40.7407	55.5556	37.037	51.8519	29.6296	88.1579	65.7895	76.1194	68.6567	56.8966	46.5517	52.7027	47.2973		'R'	'F'	'C'	'M1'	42.5926
	62.963	44.4444	51.8519	25.9259	70.3704	48.1481	25.9259	22.2222	84.2105	57.8947	82.0896	73.1343	50	36.2069	40.5405	44.5946		'R'	'F'	'C'	'M1'	42.5926
	59.2593	37.037	51.8519	18.5185	55.5556	40.7407	40.7407	25.9259	80.2632	60.5263	77.6119	52.2388	51.7241	46.5517	50	50		'R'	'F'	'C'	'M1'	42.5926
	74.0741	59.2593	70.3704	33.3333	55.5556	48.1481	40.7407	33.3333	80.2632	60.5263	77.6119	59.7015	68.9655	55.1724	51.3514	50		'R'	'F'	'C'	'M1'	44.4444
	59.2593	40.7407	66.6667	29.6296	44.4444	37.037	55.5556	51.8519	73.6842	52.6316	86.5672	65.6716	58.6207	43.1034	51.3514	45.9459		'R'	'F'	'C'	'M1'	44.4444
	48.1481	40.7407	59.2593	25.9259	70.3704	33.3333	48.1481	51.8519	73.6842	55.2632	71.6418	55.2239	56.8966	37.931	52.7027	48.6486		'R'	'F'	'C'	'M1'	46.2963
	51.8519	44.4444	59.2593	44.4444	74.0741	48.1481	55.5556	48.1481	80.2632	52.6316	76.1194	61.194	50	60.3448	37.8378	39.1892		'R'	'F'	'C'	'M1'	31.4815
	66.6667	33.3333	66.6667	33.3333	70.3704	37.037	40.7407	29.6296	85.5263	59.2105	80.597	70.1493	58.6207	60.3448	41.8919	48.6486		'R'	'F'	'C'	'M1'	40.7407
	70.3704	33.3333	66.6667	37.037	62.963	51.8519	37.037	33.3333	77.6316	59.2105	76.1194	58.209	55.1724	53.4483	43.2432	47.2973		'R'	'F'	'C'	'M1'	37.037
	59.2593	51.8519	59.2593	29.6296	59.2593	33.3333	51.8519	44.4444	85.5263	68.4211	82.0896	70.1493	58.6207	53.4483	52.7027	40.5405		'R'	'F'	'C'	'M1'	35.1852
	62.963	51.8519	77.7778	22.2222	55.5556	33.3333	44.4444	33.3333	72.3684	63.1579	83.5821	71.6418	55.1724	44.8276	48.6486	45.9459		'R'	'F'	'C'	'M1'	44.4444
	66.6667	40.7407	66.6667	33.3333	62.963	33.3333	51.8519	44.4444	81.5789	59.2105	76.1194	64.1791	58.6207	48.2759	40.5405	48.6486		'R'	'F'	'C'	'M1'	50
	62.963	33.3333	70.3704	40.7407	59.2593	37.037	55.5556	37.037	81.5789	57.8947	70.1493	61.194	51.7241	55.1724	43.2432	41.8919		'R'	'F'	'C'	'M1'	48.1481
	66.6667	48.1481	66.6667	37.037	62.963	40.7407	55.5556	29.6296	78.9474	56.5789	71.6418	55.2239	60.3448	50	43.2432	45.9459		'R'	'F'	'C'	'M1'	61.1111
	77.7778	44.4444	66.6667	29.6296	51.8519	44.4444	59.2593	40.7407	92.1053	65.7895	71.6418	62.6866	58.6207	55.1724	39.1892	45.9459		'R'	'F'	'C'	'M1'	50
	62.963	25.9259	62.963	29.6296	62.963	44.4444	44.4444	48.1481	78.9474	57.8947	73.1343	58.209	67.2414	36.2069	45.9459	45.9459		'R'	'F'	'C'	'M1'	59.2593
	59.2593	55.5556	59.2593	18.5185	62.963	48.1481	37.037	33.3333	73.6842	61.8421	77.6119	64.1791	67.2414	55.1724	41.8919	44.5946		'R'	'F'	'C'	'M1'	48.1481
	77.7778	40.7407	55.5556	33.3333	55.5556	37.037	51.8519	33.3333	76.3158	64.4737	70.1493	55.2239	63.7931	51.7241	48.6486	56.7568		'R'	'F'	'C'	'M1'	42.5926
	55.5556	37.037	55.5556	37.037	62.963	29.6296	48.1481	51.8519	80.2632	55.2632	76.1194	62.6866	46.5517	55.1724	47.2973	48.6486		'R'	'F'	'C'	'M1'	50
																		'R'	'F'	'C'	'M1'	59.2593
mean	64.1852	42.4074	63.7778	33.8148	57.2222	39.6666	47.8518	36.8518	79.3947	59.7895	77.1791	62.5672	58.3448	49.569	47.4324	47.0135		'R'	'F'	'C'	'M1'	44.4444
std	7.9323	8.89288	8.9736	8.72423	10.361	7.81333	9.29372	8.75152	4.60088	5.24425	5.35121	5.51025	6.39842	6.15274	5.42074	5.59751		'R'	'F'	'C'	'M1'	44.4444
																		'R'	'F'	'C'	'M1'	40.7407
																		'R'	'F'	'C'	'M1'	48.1481
																		'R'	'F'	'C'	'M1'	46.2963
																		'R'	'F'	'C'	'M1'	40.7407
																		'R'	'F'	'C'	'M1'	44.4444
																		'R'	'F'	'C'	'M1'	57.4074
																		'R'	'F'	'C'	'M1'	46.2963
																		'R'	'F'	'C'	'M1'	57.4074
																		'R'	'F'	'C'	'M1'	59.2593
																		'R'	'F'	'C'	'M1'	51.8519
																		'R'	'F'	'C'	'M1'	40.7407
																		'R'	'F'	'C'	'M1'	38.8889
																		'R'	'F'	'C'	'M1'	50
																		'R'	'F'	'C'	'S1'	27.7778
																		'R'	'F'	'C'	'S1'	25.9259
																		'R'	'F'	'C'	'S1'	46.2963
																		'R'	'F'	'C'	'S1'	25.9259
																		'R'	'F'	'C'	'S1'	33.3333
																		'R'	'F'	'C'	'S1'	40.7407
																		'R'	'F'	'C'	'S1'	25.9259
																		'R'	'F'	'C'	'S1'	25.9259
																		'R'	'F'	'C'	'S1'	33.3333
																		'R'	'F'	'C'	'S1'	27.7778
																		'R'	'F'	'C'	'S1'	33.3333
																		'R'	'F'	'C'	'S1'	29.6296
																		'R'	'F'	'C'	'S1'	35.1852
																		'R'	'F'	'C'	'S1'	48.1481
																		'R'	'F'	'C'	'S1'	29.6296
																		'R'	'F'	'C'	'S1'	27.7778
																		'R'	'F'	'C'	'S1'	33.3333
																		'R'	'F'	'C'	'S1'	38.8889
																		'R'	'F'	'C'	'S1'	37.037
																		'R'	'F'	'C'	'S1'	33.3333
																		'R'	'F'	'C'	'S1'	24.0741
																		'R'	'F'	'C'	'S1'	33.3333
																		'R'	'F'	'C'	'S1'	31.4815
																		'R'	'F'	'C'	'S1'	33.3333
																		'R'	'F'	'C'	'S1'	40.7407
																		'R'	'F'	'C'	'S1'	37.037
																		'R'	'F'	'C'	'S1'	42.5926
																		'R'	'F'	'C'	'S1'	25.9259
																		'R'	'F'	'C'	'S1'	38.8889
																		'R'	'F'	'C'	'S1'	33.3333
																		'R'	'F'	'C'	'S1'	33.3333
																		'R'	'F'	'C'	'S1'	37.037
																		'R'	'F'	'C'	'S1'	38.8889
																		'R'	'F'	'C'	'S1'	29.6296
																		'R'	'F'	'C'	'S1'	29.6296
																		'R'	'F'	'C'	'S1'	44.4444
																		'R'	'F'	'C'	'S1'	31.4815
																		'R'	'F'	'C'	'S1'	48.1481
																		'R'	'F'	'C'	'S1'	33.3333
																		'R'	'F'	'C'	'S1'	46.2963
																		'R'	'F'	'C'	'S1'	40.7407
																		'R'	'F'	'C'	'S1'	29.6296
																		'R'	'F'	'C'	'S1'	42.5926
																		'R'	'F'	'C'	'S1'	37.037
																		'R'	'F'	'C'	'S1'	31.4815
																		'R'	'F'	'C'	'S1'	33.3333
																		'R'	'F'	'C'	'S1'	38.8889
																		'R'	'F'	'C'	'S1'	27.7778
																		'R'	'F'	'C'	'S1'	33.3333
																		'R'	'F'	'C'	'S1'	27.7778
																		'R'	'F'	'C'	'S1'	33.3333
																		'R'	'F'	'C'	'S1'	37.037
																		'R'	'F'	'C'	'S1'	38.8889
																		'R'	'F'	'C'	'S1'	25.9259
																		'R'	'F'	'C'	'S1'	35.1852
																		'R'	'F'	'C'	'S1'	42.5926
																		'R'	'F'	'C'	'S1'	35.1852
																		'R'	'F'	'C'	'S1'	29.6296
																		'R'	'F'	'C'	'S1'	33.3333
																		'R'	'F'	'C'	'S1'	40.7407
																		'R'	'F'	'C'	'S1'	35.1852
																		'R'	'F'	'C'	'S1'	33.3333
																		'R'	'F'	'C'	'S1'	37.037
																		'R'	'F'	'C'	'S1'	50
																		'R'	'F'	'C'	'S1'	37.037
																		'R'	'F'	'C'	'S1'	37.037
																		'R'	'F'	'C'	'S1'	25.9259
																		'R'	'F'	'C'	'S1'	46.2963
																		'R'	'F'	'C'	'S1'	29.6296
																		'R'	'F'	'C'	'S1'	38.8889
																		'R'	'F'	'C'	'S1'	25.9259
																		'R'	'F'	'C'	'S1'	27.7778
																		'R'	'F'	'C'	'S1'	31.4815
																		'R'	'F'	'C'	'S1'	37.037
																		'R'	'F'	'C'	'S1'	22.2222
																		'R'	'F'	'C'	'S1'	37.037
																		'R'	'F'	'C'	'S1'	40.7407
																		'R'	'F'	'C'	'S1'	37.037
																		'R'	'F'	'C'	'S1'	37.037
																		'R'	'F'	'C'	'S1'	37.037
																		'R'	'F'	'C'	'S1'	38.8889
																		'R'	'F'	'C'	'S1'	37.037
																		'R'	'F'	'C'	'S1'	29.6296
																		'R'	'F'	'C'	'S1'	31.4815
																		'R'	'F'	'C'	'S1'	29.6296
																		'R'	'F'	'C'	'S1'	38.8889
																		'R'	'F'	'C'	'S1'	33.3333
																		'R'	'F'	'C'	'S1'	27.7778
																		'R'	'F'	'C'	'S1'	37.037
																		'R'	'F'	'C'	'S1'	40.7407
																		'R'	'F'	'C'	'S1'	38.8889
																		'R'	'F'	'C'	'S1'	29.6296
																		'R'	'F'	'C'	'S1'	40.7407
																		'R'	'F'	'C'	'S1'	40.7407
																		'R'	'F'	'C'	'S1'	31.4815
																		'R'	'F'	'C'	'S1'	33.3333
																		'R'	'F'	'C'	'S1'	42.5926
																		'R'	'F'	'C'	'S1'	40.7407
																		'R'	'F'	'C'	'S1'	24.0741
																		'R'	'F'	'C'	'S1'	29.6296
																		'R'	'F'	'NB'	'M1'	48.1481
																		'R'	'F'	'NB'	'M1'	46.2963
																		'R'	'F'	'NB'	'M1'	53.7037
																		'R'	'F'	'NB'	'M1'	46.2963
																		'R'	'F'	'NB'	'M1'	44.4444
																		'R'	'F'	'NB'	'M1'	48.1481
																		'R'	'F'	'NB'	'M1'	55.5556
																		'R'	'F'	'NB'	'M1'	51.8519
																		'R'	'F'	'NB'	'M1'	42.5926
																		'R'	'F'	'NB'	'M1'	57.4074
																		'R'	'F'	'NB'	'M1'	46.2963
																		'R'	'F'	'NB'	'M1'	48.1481
																		'R'	'F'	'NB'	'M1'	59.2593
																		'R'	'F'	'NB'	'M1'	40.7407
																		'R'	'F'	'NB'	'M1'	38.8889
																		'R'	'F'	'NB'	'M1'	48.1481
																		'R'	'F'	'NB'	'M1'	42.5926
																		'R'	'F'	'NB'	'M1'	44.4444
																		'R'	'F'	'NB'	'M1'	46.2963
																		'R'	'F'	'NB'	'M1'	53.7037
																		'R'	'F'	'NB'	'M1'	50
																		'R'	'F'	'NB'	'M1'	57.4074
																		'R'	'F'	'NB'	'M1'	57.4074
																		'R'	'F'	'NB'	'M1'	46.2963
																		'R'	'F'	'NB'	'M1'	42.5926
																		'R'	'F'	'NB'	'M1'	53.7037
																		'R'	'F'	'NB'	'M1'	59.2593
																		'R'	'F'	'NB'	'M1'	40.7407
																		'R'	'F'	'NB'	'M1'	48.1481
																		'R'	'F'	'NB'	'M1'	51.8519
																		'R'	'F'	'NB'	'M1'	53.7037
																		'R'	'F'	'NB'	'M1'	46.2963
																		'R'	'F'	'NB'	'M1'	51.8519
																		'R'	'F'	'NB'	'M1'	44.4444
																		'R'	'F'	'NB'	'M1'	44.4444
																		'R'	'F'	'NB'	'M1'	48.1481
																		'R'	'F'	'NB'	'M1'	37.037
																		'R'	'F'	'NB'	'M1'	25.9259
																		'R'	'F'	'NB'	'M1'	38.8889
																		'R'	'F'	'NB'	'M1'	35.1852
																		'R'	'F'	'NB'	'M1'	48.1481
																		'R'	'F'	'NB'	'M1'	55.5556
																		'R'	'F'	'NB'	'M1'	51.8519
																		'R'	'F'	'NB'	'M1'	51.8519
																		'R'	'F'	'NB'	'M1'	35.1852
																		'R'	'F'	'NB'	'M1'	46.2963
																		'R'	'F'	'NB'	'M1'	42.5926
																		'R'	'F'	'NB'	'M1'	46.2963
																		'R'	'F'	'NB'	'M1'	42.5926
																		'R'	'F'	'NB'	'M1'	48.1481
																		'R'	'F'	'NB'	'M1'	33.3333
																		'R'	'F'	'NB'	'M1'	53.7037
																		'R'	'F'	'NB'	'M1'	46.2963
																		'R'	'F'	'NB'	'M1'	40.7407
																		'R'	'F'	'NB'	'M1'	55.5556
																		'R'	'F'	'NB'	'M1'	46.2963
																		'R'	'F'	'NB'	'M1'	50
																		'R'	'F'	'NB'	'M1'	46.2963
																		'R'	'F'	'NB'	'M1'	46.2963
																		'R'	'F'	'NB'	'M1'	40.7407
																		'R'	'F'	'NB'	'M1'	31.4815
																		'R'	'F'	'NB'	'M1'	50
																		'R'	'F'	'NB'	'M1'	38.8889
																		'R'	'F'	'NB'	'M1'	42.5926
																		'R'	'F'	'NB'	'M1'	51.8519
																		'R'	'F'	'NB'	'M1'	46.2963
																		'R'	'F'	'NB'	'M1'	40.7407
																		'R'	'F'	'NB'	'M1'	33.3333
																		'R'	'F'	'NB'	'M1'	38.8889
																		'R'	'F'	'NB'	'M1'	44.4444
																		'R'	'F'	'NB'	'M1'	50
																		'R'	'F'	'NB'	'M1'	59.2593
																		'R'	'F'	'NB'	'M1'	55.5556
																		'R'	'F'	'NB'	'M1'	42.5926
																		'R'	'F'	'NB'	'M1'	40.7407
																		'R'	'F'	'NB'	'M1'	40.7407
																		'R'	'F'	'NB'	'M1'	42.5926
																		'R'	'F'	'NB'	'M1'	44.4444
																		'R'	'F'	'NB'	'M1'	42.5926
																		'R'	'F'	'NB'	'M1'	57.4074
																		'R'	'F'	'NB'	'M1'	51.8519
																		'R'	'F'	'NB'	'M1'	44.4444
																		'R'	'F'	'NB'	'M1'	44.4444
																		'R'	'F'	'NB'	'M1'	62.963
																		'R'	'F'	'NB'	'M1'	48.1481
																		'R'	'F'	'NB'	'M1'	46.2963
																		'R'	'F'	'NB'	'M1'	51.8519
																		'R'	'F'	'NB'	'M1'	62.963
																		'R'	'F'	'NB'	'M1'	37.037
																		'R'	'F'	'NB'	'M1'	50
																		'R'	'F'	'NB'	'M1'	55.5556
																		'R'	'F'	'NB'	'M1'	51.8519
																		'R'	'F'	'NB'	'M1'	35.1852
																		'R'	'F'	'NB'	'M1'	42.5926
																		'R'	'F'	'NB'	'M1'	55.5556
																		'R'	'F'	'NB'	'M1'	48.1481
																		'R'	'F'	'NB'	'M1'	42.5926
																		'R'	'F'	'NB'	'M1'	51.8519
																		'R'	'F'	'NB'	'M1'	46.2963
																		'R'	'F'	'NB'	'M1'	48.1481
																		'R'	'F'	'NB'	'S1'	20.3704
																		'R'	'F'	'NB'	'S1'	40.7407
																		'R'	'F'	'NB'	'S1'	35.1852
																		'R'	'F'	'NB'	'S1'	31.4815
																		'R'	'F'	'NB'	'S1'	44.4444
																		'R'	'F'	'NB'	'S1'	42.5926
																		'R'	'F'	'NB'	'S1'	35.1852
																		'R'	'F'	'NB'	'S1'	40.7407
																		'R'	'F'	'NB'	'S1'	42.5926
																		'R'	'F'	'NB'	'S1'	31.4815
																		'R'	'F'	'NB'	'S1'	46.2963
																		'R'	'F'	'NB'	'S1'	51.8519
																		'R'	'F'	'NB'	'S1'	38.8889
																		'R'	'F'	'NB'	'S1'	27.7778
																		'R'	'F'	'NB'	'S1'	29.6296
																		'R'	'F'	'NB'	'S1'	40.7407
																		'R'	'F'	'NB'	'S1'	48.1481
																		'R'	'F'	'NB'	'S1'	46.2963
																		'R'	'F'	'NB'	'S1'	37.037
																		'R'	'F'	'NB'	'S1'	46.2963
																		'R'	'F'	'NB'	'S1'	44.4444
																		'R'	'F'	'NB'	'S1'	31.4815
																		'R'	'F'	'NB'	'S1'	35.1852
																		'R'	'F'	'NB'	'S1'	33.3333
																		'R'	'F'	'NB'	'S1'	33.3333
																		'R'	'F'	'NB'	'S1'	44.4444
																		'R'	'F'	'NB'	'S1'	31.4815
																		'R'	'F'	'NB'	'S1'	42.5926
																		'R'	'F'	'NB'	'S1'	33.3333
																		'R'	'F'	'NB'	'S1'	44.4444
																		'R'	'F'	'NB'	'S1'	33.3333
																		'R'	'F'	'NB'	'S1'	46.2963
																		'R'	'F'	'NB'	'S1'	37.037
																		'R'	'F'	'NB'	'S1'	40.7407
																		'R'	'F'	'NB'	'S1'	40.7407
																		'R'	'F'	'NB'	'S1'	38.8889
																		'R'	'F'	'NB'	'S1'	46.2963
																		'R'	'F'	'NB'	'S1'	46.2963
																		'R'	'F'	'NB'	'S1'	35.1852
																		'R'	'F'	'NB'	'S1'	37.037
																		'R'	'F'	'NB'	'S1'	25.9259
																		'R'	'F'	'NB'	'S1'	37.037
																		'R'	'F'	'NB'	'S1'	37.037
																		'R'	'F'	'NB'	'S1'	46.2963
																		'R'	'F'	'NB'	'S1'	40.7407
																		'R'	'F'	'NB'	'S1'	27.7778
																		'R'	'F'	'NB'	'S1'	40.7407
																		'R'	'F'	'NB'	'S1'	35.1852
																		'R'	'F'	'NB'	'S1'	31.4815
																		'R'	'F'	'NB'	'S1'	46.2963
																		'R'	'F'	'NB'	'S1'	37.037
																		'R'	'F'	'NB'	'S1'	33.3333
																		'R'	'F'	'NB'	'S1'	38.8889
																		'R'	'F'	'NB'	'S1'	38.8889
																		'R'	'F'	'NB'	'S1'	42.5926
																		'R'	'F'	'NB'	'S1'	38.8889
																		'R'	'F'	'NB'	'S1'	29.6296
																		'R'	'F'	'NB'	'S1'	31.4815
																		'R'	'F'	'NB'	'S1'	46.2963
																		'R'	'F'	'NB'	'S1'	31.4815
																		'R'	'F'	'NB'	'S1'	37.037
																		'R'	'F'	'NB'	'S1'	44.4444
																		'R'	'F'	'NB'	'S1'	42.5926
																		'R'	'F'	'NB'	'S1'	38.8889
																		'R'	'F'	'NB'	'S1'	46.2963
																		'R'	'F'	'NB'	'S1'	48.1481
																		'R'	'F'	'NB'	'S1'	35.1852
																		'R'	'F'	'NB'	'S1'	31.4815
																		'R'	'F'	'NB'	'S1'	46.2963
																		'R'	'F'	'NB'	'S1'	46.2963
																		'R'	'F'	'NB'	'S1'	35.1852
																		'R'	'F'	'NB'	'S1'	37.037
																		'R'	'F'	'NB'	'S1'	38.8889
																		'R'	'F'	'NB'	'S1'	35.1852
																		'R'	'F'	'NB'	'S1'	38.8889
																		'R'	'F'	'NB'	'S1'	38.8889
																		'R'	'F'	'NB'	'S1'	44.4444
																		'R'	'F'	'NB'	'S1'	42.5926
																		'R'	'F'	'NB'	'S1'	46.2963
																		'R'	'F'	'NB'	'S1'	37.037
																		'R'	'F'	'NB'	'S1'	29.6296
																		'R'	'F'	'NB'	'S1'	35.1852
																		'R'	'F'	'NB'	'S1'	25.9259
																		'R'	'F'	'NB'	'S1'	38.8889
																		'R'	'F'	'NB'	'S1'	25.9259
																		'R'	'F'	'NB'	'S1'	40.7407
																		'R'	'F'	'NB'	'S1'	48.1481
																		'R'	'F'	'NB'	'S1'	46.2963
																		'R'	'F'	'NB'	'S1'	31.4815
																		'R'	'F'	'NB'	'S1'	33.3333
																		'R'	'F'	'NB'	'S1'	46.2963
																		'R'	'F'	'NB'	'S1'	35.1852
																		'R'	'F'	'NB'	'S1'	44.4444
																		'R'	'F'	'NB'	'S1'	25.9259
																		'R'	'F'	'NB'	'S1'	37.037
																		'R'	'F'	'NB'	'S1'	44.4444
																		'R'	'F'	'NB'	'S1'	24.0741
																		'R'	'F'	'NB'	'S1'	37.037
																		'R'	'F'	'NB'	'S1'	40.7407
																		'R'	'F'	'NB'	'S1'	50
																		'Y'	'F'	'C'	'M1'	51.8519
																		'Y'	'F'	'C'	'M1'	46.2963
																		'Y'	'F'	'C'	'M1'	48.1481
																		'Y'	'F'	'C'	'M1'	40.7407
																		'Y'	'F'	'C'	'M1'	38.8889
																		'Y'	'F'	'C'	'M1'	46.2963
																		'Y'	'F'	'C'	'M1'	50
																		'Y'	'F'	'C'	'M1'	50
																		'Y'	'F'	'C'	'M1'	50
																		'Y'	'F'	'C'	'M1'	48.1481
																		'Y'	'F'	'C'	'M1'	62.963
																		'Y'	'F'	'C'	'M1'	50
																		'Y'	'F'	'C'	'M1'	44.4444
																		'Y'	'F'	'C'	'M1'	61.1111
																		'Y'	'F'	'C'	'M1'	37.037
																		'Y'	'F'	'C'	'M1'	42.5926
																		'Y'	'F'	'C'	'M1'	48.1481
																		'Y'	'F'	'C'	'M1'	51.8519
																		'Y'	'F'	'C'	'M1'	61.1111
																		'Y'	'F'	'C'	'M1'	42.5926
																		'Y'	'F'	'C'	'M1'	46.2963
																		'Y'	'F'	'C'	'M1'	51.8519
																		'Y'	'F'	'C'	'M1'	48.1481
																		'Y'	'F'	'C'	'M1'	35.1852
																		'Y'	'F'	'C'	'M1'	33.3333
																		'Y'	'F'	'C'	'M1'	59.2593
																		'Y'	'F'	'C'	'M1'	50
																		'Y'	'F'	'C'	'M1'	53.7037
																		'Y'	'F'	'C'	'M1'	37.037
																		'Y'	'F'	'C'	'M1'	44.4444
																		'Y'	'F'	'C'	'M1'	53.7037
																		'Y'	'F'	'C'	'M1'	42.5926
																		'Y'	'F'	'C'	'M1'	38.8889
																		'Y'	'F'	'C'	'M1'	50
																		'Y'	'F'	'C'	'M1'	40.7407
																		'Y'	'F'	'C'	'M1'	55.5556
																		'Y'	'F'	'C'	'M1'	44.4444
																		'Y'	'F'	'C'	'M1'	33.3333
																		'Y'	'F'	'C'	'M1'	57.4074
																		'Y'	'F'	'C'	'M1'	37.037
																		'Y'	'F'	'C'	'M1'	46.2963
																		'Y'	'F'	'C'	'M1'	44.4444
																		'Y'	'F'	'C'	'M1'	48.1481
																		'Y'	'F'	'C'	'M1'	48.1481
																		'Y'	'F'	'C'	'M1'	50
																		'Y'	'F'	'C'	'M1'	50
																		'Y'	'F'	'C'	'M1'	44.4444
																		'Y'	'F'	'C'	'M1'	38.8889
																		'Y'	'F'	'C'	'M1'	46.2963
																		'Y'	'F'	'C'	'M1'	55.5556
																		'Y'	'F'	'C'	'M1'	53.7037
																		'Y'	'F'	'C'	'M1'	48.1481
																		'Y'	'F'	'C'	'M1'	46.2963
																		'Y'	'F'	'C'	'M1'	61.1111
																		'Y'	'F'	'C'	'M1'	64.8148
																		'Y'	'F'	'C'	'M1'	57.4074
																		'Y'	'F'	'C'	'M1'	53.7037
																		'Y'	'F'	'C'	'M1'	50
																		'Y'	'F'	'C'	'M1'	44.4444
																		'Y'	'F'	'C'	'M1'	51.8519
																		'Y'	'F'	'C'	'M1'	46.2963
																		'Y'	'F'	'C'	'M1'	48.1481
																		'Y'	'F'	'C'	'M1'	48.1481
																		'Y'	'F'	'C'	'M1'	51.8519
																		'Y'	'F'	'C'	'M1'	50
																		'Y'	'F'	'C'	'M1'	55.5556
																		'Y'	'F'	'C'	'M1'	55.5556
																		'Y'	'F'	'C'	'M1'	53.7037
																		'Y'	'F'	'C'	'M1'	55.5556
																		'Y'	'F'	'C'	'M1'	53.7037
																		'Y'	'F'	'C'	'M1'	61.1111
																		'Y'	'F'	'C'	'M1'	42.5926
																		'Y'	'F'	'C'	'M1'	48.1481
																		'Y'	'F'	'C'	'M1'	50
																		'Y'	'F'	'C'	'M1'	50
																		'Y'	'F'	'C'	'M1'	42.5926
																		'Y'	'F'	'C'	'M1'	40.7407
																		'Y'	'F'	'C'	'M1'	50
																		'Y'	'F'	'C'	'M1'	53.7037
																		'Y'	'F'	'C'	'M1'	55.5556
																		'Y'	'F'	'C'	'M1'	44.4444
																		'Y'	'F'	'C'	'M1'	50
																		'Y'	'F'	'C'	'M1'	55.5556
																		'Y'	'F'	'C'	'M1'	57.4074
																		'Y'	'F'	'C'	'M1'	40.7407
																		'Y'	'F'	'C'	'M1'	48.1481
																		'Y'	'F'	'C'	'M1'	40.7407
																		'Y'	'F'	'C'	'M1'	38.8889
																		'Y'	'F'	'C'	'M1'	35.1852
																		'Y'	'F'	'C'	'M1'	42.5926
																		'Y'	'F'	'C'	'M1'	66.6667
																		'Y'	'F'	'C'	'M1'	42.5926
																		'Y'	'F'	'C'	'M1'	51.8519
																		'Y'	'F'	'C'	'M1'	44.4444
																		'Y'	'F'	'C'	'M1'	44.4444
																		'Y'	'F'	'C'	'M1'	46.2963
																		'Y'	'F'	'C'	'M1'	53.7037
																		'Y'	'F'	'C'	'M1'	51.8519
																		'Y'	'F'	'C'	'M1'	46.2963
																		'Y'	'F'	'C'	'M1'	44.4444
																		'Y'	'F'	'C'	'S1'	48.1481
																		'Y'	'F'	'C'	'S1'	29.6296
																		'Y'	'F'	'C'	'S1'	38.8889
																		'Y'	'F'	'C'	'S1'	37.037
																		'Y'	'F'	'C'	'S1'	40.7407
																		'Y'	'F'	'C'	'S1'	37.037
																		'Y'	'F'	'C'	'S1'	27.7778
																		'Y'	'F'	'C'	'S1'	37.037
																		'Y'	'F'	'C'	'S1'	37.037
																		'Y'	'F'	'C'	'S1'	35.1852
																		'Y'	'F'	'C'	'S1'	35.1852
																		'Y'	'F'	'C'	'S1'	29.6296
																		'Y'	'F'	'C'	'S1'	29.6296
																		'Y'	'F'	'C'	'S1'	44.4444
																		'Y'	'F'	'C'	'S1'	35.1852
																		'Y'	'F'	'C'	'S1'	46.2963
																		'Y'	'F'	'C'	'S1'	40.7407
																		'Y'	'F'	'C'	'S1'	37.037
																		'Y'	'F'	'C'	'S1'	50
																		'Y'	'F'	'C'	'S1'	37.037
																		'Y'	'F'	'C'	'S1'	35.1852
																		'Y'	'F'	'C'	'S1'	37.037
																		'Y'	'F'	'C'	'S1'	38.8889
																		'Y'	'F'	'C'	'S1'	31.4815
																		'Y'	'F'	'C'	'S1'	37.037
																		'Y'	'F'	'C'	'S1'	42.5926
																		'Y'	'F'	'C'	'S1'	37.037
																		'Y'	'F'	'C'	'S1'	33.3333
																		'Y'	'F'	'C'	'S1'	25.9259
																		'Y'	'F'	'C'	'S1'	37.037
																		'Y'	'F'	'C'	'S1'	42.5926
																		'Y'	'F'	'C'	'S1'	35.1852
																		'Y'	'F'	'C'	'S1'	40.7407
																		'Y'	'F'	'C'	'S1'	48.1481
																		'Y'	'F'	'C'	'S1'	42.5926
																		'Y'	'F'	'C'	'S1'	42.5926
																		'Y'	'F'	'C'	'S1'	25.9259
																		'Y'	'F'	'C'	'S1'	33.3333
																		'Y'	'F'	'C'	'S1'	46.2963
																		'Y'	'F'	'C'	'S1'	42.5926
																		'Y'	'F'	'C'	'S1'	38.8889
																		'Y'	'F'	'C'	'S1'	37.037
																		'Y'	'F'	'C'	'S1'	31.4815
																		'Y'	'F'	'C'	'S1'	29.6296
																		'Y'	'F'	'C'	'S1'	40.7407
																		'Y'	'F'	'C'	'S1'	27.7778
																		'Y'	'F'	'C'	'S1'	37.037
																		'Y'	'F'	'C'	'S1'	40.7407
																		'Y'	'F'	'C'	'S1'	38.8889
																		'Y'	'F'	'C'	'S1'	38.8889
																		'Y'	'F'	'C'	'S1'	31.4815
																		'Y'	'F'	'C'	'S1'	46.2963
																		'Y'	'F'	'C'	'S1'	37.037
																		'Y'	'F'	'C'	'S1'	40.7407
																		'Y'	'F'	'C'	'S1'	29.6296
																		'Y'	'F'	'C'	'S1'	38.8889
																		'Y'	'F'	'C'	'S1'	31.4815
																		'Y'	'F'	'C'	'S1'	37.037
																		'Y'	'F'	'C'	'S1'	40.7407
																		'Y'	'F'	'C'	'S1'	37.037
																		'Y'	'F'	'C'	'S1'	31.4815
																		'Y'	'F'	'C'	'S1'	42.5926
																		'Y'	'F'	'C'	'S1'	40.7407
																		'Y'	'F'	'C'	'S1'	35.1852
																		'Y'	'F'	'C'	'S1'	40.7407
																		'Y'	'F'	'C'	'S1'	44.4444
																		'Y'	'F'	'C'	'S1'	33.3333
																		'Y'	'F'	'C'	'S1'	35.1852
																		'Y'	'F'	'C'	'S1'	31.4815
																		'Y'	'F'	'C'	'S1'	31.4815
																		'Y'	'F'	'C'	'S1'	44.4444
																		'Y'	'F'	'C'	'S1'	31.4815
																		'Y'	'F'	'C'	'S1'	38.8889
																		'Y'	'F'	'C'	'S1'	42.5926
																		'Y'	'F'	'C'	'S1'	38.8889
																		'Y'	'F'	'C'	'S1'	33.3333
																		'Y'	'F'	'C'	'S1'	31.4815
																		'Y'	'F'	'C'	'S1'	31.4815
																		'Y'	'F'	'C'	'S1'	24.0741
																		'Y'	'F'	'C'	'S1'	27.7778
																		'Y'	'F'	'C'	'S1'	37.037
																		'Y'	'F'	'C'	'S1'	27.7778
																		'Y'	'F'	'C'	'S1'	35.1852
																		'Y'	'F'	'C'	'S1'	38.8889
																		'Y'	'F'	'C'	'S1'	42.5926
																		'Y'	'F'	'C'	'S1'	35.1852
																		'Y'	'F'	'C'	'S1'	42.5926
																		'Y'	'F'	'C'	'S1'	48.1481
																		'Y'	'F'	'C'	'S1'	40.7407
																		'Y'	'F'	'C'	'S1'	27.7778
																		'Y'	'F'	'C'	'S1'	35.1852
																		'Y'	'F'	'C'	'S1'	35.1852
																		'Y'	'F'	'C'	'S1'	37.037
																		'Y'	'F'	'C'	'S1'	38.8889
																		'Y'	'F'	'C'	'S1'	33.3333
																		'Y'	'F'	'C'	'S1'	38.8889
																		'Y'	'F'	'C'	'S1'	29.6296
																		'Y'	'F'	'C'	'S1'	53.7037
																		'Y'	'F'	'C'	'S1'	48.1481
																		'Y'	'F'	'C'	'S1'	40.7407
																		'Y'	'F'	'NB'	'M1'	62.963
																		'Y'	'F'	'NB'	'M1'	37.037
																		'Y'	'F'	'NB'	'M1'	42.5926
																		'Y'	'F'	'NB'	'M1'	42.5926
																		'Y'	'F'	'NB'	'M1'	55.5556
																		'Y'	'F'	'NB'	'M1'	48.1481
																		'Y'	'F'	'NB'	'M1'	44.4444
																		'Y'	'F'	'NB'	'M1'	40.7407
																		'Y'	'F'	'NB'	'M1'	40.7407
																		'Y'	'F'	'NB'	'M1'	27.7778
																		'Y'	'F'	'NB'	'M1'	37.037
																		'Y'	'F'	'NB'	'M1'	50
																		'Y'	'F'	'NB'	'M1'	46.2963
																		'Y'	'F'	'NB'	'M1'	31.4815
																		'Y'	'F'	'NB'	'M1'	27.7778
																		'Y'	'F'	'NB'	'M1'	46.2963
																		'Y'	'F'	'NB'	'M1'	44.4444
																		'Y'	'F'	'NB'	'M1'	46.2963
																		'Y'	'F'	'NB'	'M1'	35.1852
																		'Y'	'F'	'NB'	'M1'	42.5926
																		'Y'	'F'	'NB'	'M1'	50
																		'Y'	'F'	'NB'	'M1'	44.4444
																		'Y'	'F'	'NB'	'M1'	42.5926
																		'Y'	'F'	'NB'	'M1'	50
																		'Y'	'F'	'NB'	'M1'	55.5556
																		'Y'	'F'	'NB'	'M1'	38.8889
																		'Y'	'F'	'NB'	'M1'	35.1852
																		'Y'	'F'	'NB'	'M1'	40.7407
																		'Y'	'F'	'NB'	'M1'	42.5926
																		'Y'	'F'	'NB'	'M1'	44.4444
																		'Y'	'F'	'NB'	'M1'	42.5926
																		'Y'	'F'	'NB'	'M1'	40.7407
																		'Y'	'F'	'NB'	'M1'	48.1481
																		'Y'	'F'	'NB'	'M1'	57.4074
																		'Y'	'F'	'NB'	'M1'	40.7407
																		'Y'	'F'	'NB'	'M1'	35.1852
																		'Y'	'F'	'NB'	'M1'	48.1481
																		'Y'	'F'	'NB'	'M1'	37.037
																		'Y'	'F'	'NB'	'M1'	50
																		'Y'	'F'	'NB'	'M1'	44.4444
																		'Y'	'F'	'NB'	'M1'	33.3333
																		'Y'	'F'	'NB'	'M1'	51.8519
																		'Y'	'F'	'NB'	'M1'	53.7037
																		'Y'	'F'	'NB'	'M1'	44.4444
																		'Y'	'F'	'NB'	'M1'	40.7407
																		'Y'	'F'	'NB'	'M1'	42.5926
																		'Y'	'F'	'NB'	'M1'	38.8889
																		'Y'	'F'	'NB'	'M1'	42.5926
																		'Y'	'F'	'NB'	'M1'	31.4815
																		'Y'	'F'	'NB'	'M1'	46.2963
																		'Y'	'F'	'NB'	'M1'	38.8889
																		'Y'	'F'	'NB'	'M1'	51.8519
																		'Y'	'F'	'NB'	'M1'	42.5926
																		'Y'	'F'	'NB'	'M1'	48.1481
																		'Y'	'F'	'NB'	'M1'	44.4444
																		'Y'	'F'	'NB'	'M1'	44.4444
																		'Y'	'F'	'NB'	'M1'	40.7407
																		'Y'	'F'	'NB'	'M1'	46.2963
																		'Y'	'F'	'NB'	'M1'	53.7037
																		'Y'	'F'	'NB'	'M1'	44.4444
																		'Y'	'F'	'NB'	'M1'	46.2963
																		'Y'	'F'	'NB'	'M1'	40.7407
																		'Y'	'F'	'NB'	'M1'	42.5926
																		'Y'	'F'	'NB'	'M1'	37.037
																		'Y'	'F'	'NB'	'M1'	37.037
																		'Y'	'F'	'NB'	'M1'	48.1481
																		'Y'	'F'	'NB'	'M1'	37.037
																		'Y'	'F'	'NB'	'M1'	37.037
																		'Y'	'F'	'NB'	'M1'	37.037
																		'Y'	'F'	'NB'	'M1'	38.8889
																		'Y'	'F'	'NB'	'M1'	59.2593
																		'Y'	'F'	'NB'	'M1'	50
																		'Y'	'F'	'NB'	'M1'	37.037
																		'Y'	'F'	'NB'	'M1'	46.2963
																		'Y'	'F'	'NB'	'M1'	38.8889
																		'Y'	'F'	'NB'	'M1'	44.4444
																		'Y'	'F'	'NB'	'M1'	48.1481
																		'Y'	'F'	'NB'	'M1'	42.5926
																		'Y'	'F'	'NB'	'M1'	40.7407
																		'Y'	'F'	'NB'	'M1'	55.5556
																		'Y'	'F'	'NB'	'M1'	48.1481
																		'Y'	'F'	'NB'	'M1'	50
																		'Y'	'F'	'NB'	'M1'	44.4444
																		'Y'	'F'	'NB'	'M1'	48.1481
																		'Y'	'F'	'NB'	'M1'	31.4815
																		'Y'	'F'	'NB'	'M1'	48.1481
																		'Y'	'F'	'NB'	'M1'	46.2963
																		'Y'	'F'	'NB'	'M1'	37.037
																		'Y'	'F'	'NB'	'M1'	42.5926
																		'Y'	'F'	'NB'	'M1'	46.2963
																		'Y'	'F'	'NB'	'M1'	44.4444
																		'Y'	'F'	'NB'	'M1'	44.4444
																		'Y'	'F'	'NB'	'M1'	42.5926
																		'Y'	'F'	'NB'	'M1'	44.4444
																		'Y'	'F'	'NB'	'M1'	46.2963
																		'Y'	'F'	'NB'	'M1'	46.2963
																		'Y'	'F'	'NB'	'M1'	40.7407
																		'Y'	'F'	'NB'	'M1'	48.1481
																		'Y'	'F'	'NB'	'M1'	24.0741
																		'Y'	'F'	'NB'	'M1'	44.4444
																		'Y'	'F'	'NB'	'S1'	33.3333
																		'Y'	'F'	'NB'	'S1'	29.6296
																		'Y'	'F'	'NB'	'S1'	53.7037
																		'Y'	'F'	'NB'	'S1'	37.037
																		'Y'	'F'	'NB'	'S1'	57.4074
																		'Y'	'F'	'NB'	'S1'	31.4815
																		'Y'	'F'	'NB'	'S1'	55.5556
																		'Y'	'F'	'NB'	'S1'	44.4444
																		'Y'	'F'	'NB'	'S1'	40.7407
																		'Y'	'F'	'NB'	'S1'	40.7407
																		'Y'	'F'	'NB'	'S1'	50
																		'Y'	'F'	'NB'	'S1'	42.5926
																		'Y'	'F'	'NB'	'S1'	37.037
																		'Y'	'F'	'NB'	'S1'	31.4815
																		'Y'	'F'	'NB'	'S1'	37.037
																		'Y'	'F'	'NB'	'S1'	46.2963
																		'Y'	'F'	'NB'	'S1'	42.5926
																		'Y'	'F'	'NB'	'S1'	35.1852
																		'Y'	'F'	'NB'	'S1'	38.8889
																		'Y'	'F'	'NB'	'S1'	38.8889
																		'Y'	'F'	'NB'	'S1'	27.7778
																		'Y'	'F'	'NB'	'S1'	40.7407
																		'Y'	'F'	'NB'	'S1'	37.037
																		'Y'	'F'	'NB'	'S1'	37.037
																		'Y'	'F'	'NB'	'S1'	37.037
																		'Y'	'F'	'NB'	'S1'	46.2963
																		'Y'	'F'	'NB'	'S1'	40.7407
																		'Y'	'F'	'NB'	'S1'	44.4444
																		'Y'	'F'	'NB'	'S1'	44.4444
																		'Y'	'F'	'NB'	'S1'	33.3333
																		'Y'	'F'	'NB'	'S1'	38.8889
																		'Y'	'F'	'NB'	'S1'	31.4815
																		'Y'	'F'	'NB'	'S1'	33.3333
																		'Y'	'F'	'NB'	'S1'	27.7778
																		'Y'	'F'	'NB'	'S1'	27.7778
																		'Y'	'F'	'NB'	'S1'	31.4815
																		'Y'	'F'	'NB'	'S1'	42.5926
																		'Y'	'F'	'NB'	'S1'	48.1481
																		'Y'	'F'	'NB'	'S1'	37.037
																		'Y'	'F'	'NB'	'S1'	37.037
																		'Y'	'F'	'NB'	'S1'	33.3333
																		'Y'	'F'	'NB'	'S1'	46.2963
																		'Y'	'F'	'NB'	'S1'	20.3704
																		'Y'	'F'	'NB'	'S1'	44.4444
																		'Y'	'F'	'NB'	'S1'	40.7407
																		'Y'	'F'	'NB'	'S1'	44.4444
																		'Y'	'F'	'NB'	'S1'	33.3333
																		'Y'	'F'	'NB'	'S1'	42.5926
																		'Y'	'F'	'NB'	'S1'	27.7778
																		'Y'	'F'	'NB'	'S1'	25.9259
																		'Y'	'F'	'NB'	'S1'	37.037
																		'Y'	'F'	'NB'	'S1'	37.037
																		'Y'	'F'	'NB'	'S1'	31.4815
																		'Y'	'F'	'NB'	'S1'	25.9259
																		'Y'	'F'	'NB'	'S1'	38.8889
																		'Y'	'F'	'NB'	'S1'	33.3333
																		'Y'	'F'	'NB'	'S1'	40.7407
																		'Y'	'F'	'NB'	'S1'	38.8889
																		'Y'	'F'	'NB'	'S1'	35.1852
																		'Y'	'F'	'NB'	'S1'	24.0741
																		'Y'	'F'	'NB'	'S1'	31.4815
																		'Y'	'F'	'NB'	'S1'	25.9259
																		'Y'	'F'	'NB'	'S1'	16.6667
																		'Y'	'F'	'NB'	'S1'	38.8889
																		'Y'	'F'	'NB'	'S1'	29.6296
																		'Y'	'F'	'NB'	'S1'	38.8889
																		'Y'	'F'	'NB'	'S1'	38.8889
																		'Y'	'F'	'NB'	'S1'	40.7407
																		'Y'	'F'	'NB'	'S1'	37.037
																		'Y'	'F'	'NB'	'S1'	29.6296
																		'Y'	'F'	'NB'	'S1'	38.8889
																		'Y'	'F'	'NB'	'S1'	37.037
																		'Y'	'F'	'NB'	'S1'	25.9259
																		'Y'	'F'	'NB'	'S1'	46.2963
																		'Y'	'F'	'NB'	'S1'	37.037
																		'Y'	'F'	'NB'	'S1'	42.5926
																		'Y'	'F'	'NB'	'S1'	46.2963
																		'Y'	'F'	'NB'	'S1'	40.7407
																		'Y'	'F'	'NB'	'S1'	38.8889
																		'Y'	'F'	'NB'	'S1'	38.8889
																		'Y'	'F'	'NB'	'S1'	38.8889
																		'Y'	'F'	'NB'	'S1'	35.1852
																		'Y'	'F'	'NB'	'S1'	31.4815
																		'Y'	'F'	'NB'	'S1'	44.4444
																		'Y'	'F'	'NB'	'S1'	40.7407
																		'Y'	'F'	'NB'	'S1'	38.8889
																		'Y'	'F'	'NB'	'S1'	37.037
																		'Y'	'F'	'NB'	'S1'	31.4815
																		'Y'	'F'	'NB'	'S1'	37.037
																		'Y'	'F'	'NB'	'S1'	37.037
																		'Y'	'F'	'NB'	'S1'	35.1852
																		'Y'	'F'	'NB'	'S1'	40.7407
																		'Y'	'F'	'NB'	'S1'	42.5926
																		'Y'	'F'	'NB'	'S1'	37.037
																		'Y'	'F'	'NB'	'S1'	42.5926
																		'Y'	'F'	'NB'	'S1'	27.7778
																		'Y'	'F'	'NB'	'S1'	40.7407
																		'Y'	'F'	'NB'	'S1'	35.1852
																		'Y'	'F'	'NB'	'S1'	35.1852
																		'Y'	'F'	'NB'	'S1'	35.1852
																		'R'	'D'	'C'	'M1'	59.2105
																		'R'	'D'	'C'	'M1'	72.3684
																		'R'	'D'	'C'	'M1'	61.8421
																		'R'	'D'	'C'	'M1'	61.8421
																		'R'	'D'	'C'	'M1'	76.3158
																		'R'	'D'	'C'	'M1'	64.4737
																		'R'	'D'	'C'	'M1'	75
																		'R'	'D'	'C'	'M1'	77.6316
																		'R'	'D'	'C'	'M1'	61.8421
																		'R'	'D'	'C'	'M1'	59.2105
																		'R'	'D'	'C'	'M1'	82.8947
																		'R'	'D'	'C'	'M1'	73.6842
																		'R'	'D'	'C'	'M1'	82.8947
																		'R'	'D'	'C'	'M1'	73.6842
																		'R'	'D'	'C'	'M1'	76.3158
																		'R'	'D'	'C'	'M1'	72.3684
																		'R'	'D'	'C'	'M1'	78.9474
																		'R'	'D'	'C'	'M1'	64.4737
																		'R'	'D'	'C'	'M1'	65.7895
																		'R'	'D'	'C'	'M1'	59.2105
																		'R'	'D'	'C'	'M1'	53.9474
																		'R'	'D'	'C'	'M1'	65.7895
																		'R'	'D'	'C'	'M1'	77.6316
																		'R'	'D'	'C'	'M1'	71.0526
																		'R'	'D'	'C'	'M1'	61.8421
																		'R'	'D'	'C'	'M1'	73.6842
																		'R'	'D'	'C'	'M1'	60.5263
																		'R'	'D'	'C'	'M1'	65.7895
																		'R'	'D'	'C'	'M1'	69.7368
																		'R'	'D'	'C'	'M1'	67.1053
																		'R'	'D'	'C'	'M1'	59.2105
																		'R'	'D'	'C'	'M1'	76.3158
																		'R'	'D'	'C'	'M1'	51.3158
																		'R'	'D'	'C'	'M1'	65.7895
																		'R'	'D'	'C'	'M1'	53.9474
																		'R'	'D'	'C'	'M1'	68.4211
																		'R'	'D'	'C'	'M1'	51.3158
																		'R'	'D'	'C'	'M1'	63.1579
																		'R'	'D'	'C'	'M1'	77.6316
																		'R'	'D'	'C'	'M1'	64.4737
																		'R'	'D'	'C'	'M1'	63.1579
																		'R'	'D'	'C'	'M1'	67.1053
																		'R'	'D'	'C'	'M1'	75
																		'R'	'D'	'C'	'M1'	72.3684
																		'R'	'D'	'C'	'M1'	67.1053
																		'R'	'D'	'C'	'M1'	77.6316
																		'R'	'D'	'C'	'M1'	76.3158
																		'R'	'D'	'C'	'M1'	63.1579
																		'R'	'D'	'C'	'M1'	73.6842
																		'R'	'D'	'C'	'M1'	80.2632
																		'R'	'D'	'C'	'M1'	59.2105
																		'R'	'D'	'C'	'M1'	73.6842
																		'R'	'D'	'C'	'M1'	71.0526
																		'R'	'D'	'C'	'M1'	67.1053
																		'R'	'D'	'C'	'M1'	73.6842
																		'R'	'D'	'C'	'M1'	65.7895
																		'R'	'D'	'C'	'M1'	64.4737
																		'R'	'D'	'C'	'M1'	75
																		'R'	'D'	'C'	'M1'	69.7368
																		'R'	'D'	'C'	'M1'	67.1053
																		'R'	'D'	'C'	'M1'	63.1579
																		'R'	'D'	'C'	'M1'	73.6842
																		'R'	'D'	'C'	'M1'	60.5263
																		'R'	'D'	'C'	'M1'	81.5789
																		'R'	'D'	'C'	'M1'	67.1053
																		'R'	'D'	'C'	'M1'	82.8947
																		'R'	'D'	'C'	'M1'	73.6842
																		'R'	'D'	'C'	'M1'	72.3684
																		'R'	'D'	'C'	'M1'	65.7895
																		'R'	'D'	'C'	'M1'	52.6316
																		'R'	'D'	'C'	'M1'	69.7368
																		'R'	'D'	'C'	'M1'	78.9474
																		'R'	'D'	'C'	'M1'	69.7368
																		'R'	'D'	'C'	'M1'	60.5263
																		'R'	'D'	'C'	'M1'	67.1053
																		'R'	'D'	'C'	'M1'	60.5263
																		'R'	'D'	'C'	'M1'	64.4737
																		'R'	'D'	'C'	'M1'	72.3684
																		'R'	'D'	'C'	'M1'	61.8421
																		'R'	'D'	'C'	'M1'	75
																		'R'	'D'	'C'	'M1'	60.5263
																		'R'	'D'	'C'	'M1'	69.7368
																		'R'	'D'	'C'	'M1'	67.1053
																		'R'	'D'	'C'	'M1'	57.8947
																		'R'	'D'	'C'	'M1'	59.2105
																		'R'	'D'	'C'	'M1'	73.6842
																		'R'	'D'	'C'	'M1'	65.7895
																		'R'	'D'	'C'	'M1'	61.8421
																		'R'	'D'	'C'	'M1'	55.2632
																		'R'	'D'	'C'	'M1'	60.5263
																		'R'	'D'	'C'	'M1'	78.9474
																		'R'	'D'	'C'	'M1'	55.2632
																		'R'	'D'	'C'	'M1'	72.3684
																		'R'	'D'	'C'	'M1'	71.0526
																		'R'	'D'	'C'	'M1'	82.8947
																		'R'	'D'	'C'	'M1'	57.8947
																		'R'	'D'	'C'	'M1'	73.6842
																		'R'	'D'	'C'	'M1'	72.3684
																		'R'	'D'	'C'	'M1'	61.8421
																		'R'	'D'	'C'	'M1'	73.6842
																		'R'	'D'	'C'	'S1'	55.2632
																		'R'	'D'	'C'	'S1'	57.8947
																		'R'	'D'	'C'	'S1'	60.5263
																		'R'	'D'	'C'	'S1'	63.1579
																		'R'	'D'	'C'	'S1'	60.5263
																		'R'	'D'	'C'	'S1'	51.3158
																		'R'	'D'	'C'	'S1'	51.3158
																		'R'	'D'	'C'	'S1'	63.1579
																		'R'	'D'	'C'	'S1'	55.2632
																		'R'	'D'	'C'	'S1'	51.3158
																		'R'	'D'	'C'	'S1'	63.1579
																		'R'	'D'	'C'	'S1'	61.8421
																		'R'	'D'	'C'	'S1'	63.1579
																		'R'	'D'	'C'	'S1'	61.8421
																		'R'	'D'	'C'	'S1'	60.5263
																		'R'	'D'	'C'	'S1'	69.7368
																		'R'	'D'	'C'	'S1'	60.5263
																		'R'	'D'	'C'	'S1'	64.4737
																		'R'	'D'	'C'	'S1'	65.7895
																		'R'	'D'	'C'	'S1'	55.2632
																		'R'	'D'	'C'	'S1'	55.2632
																		'R'	'D'	'C'	'S1'	65.7895
																		'R'	'D'	'C'	'S1'	63.1579
																		'R'	'D'	'C'	'S1'	57.8947
																		'R'	'D'	'C'	'S1'	61.8421
																		'R'	'D'	'C'	'S1'	57.8947
																		'R'	'D'	'C'	'S1'	50
																		'R'	'D'	'C'	'S1'	52.6316
																		'R'	'D'	'C'	'S1'	55.2632
																		'R'	'D'	'C'	'S1'	61.8421
																		'R'	'D'	'C'	'S1'	65.7895
																		'R'	'D'	'C'	'S1'	59.2105
																		'R'	'D'	'C'	'S1'	56.5789
																		'R'	'D'	'C'	'S1'	61.8421
																		'R'	'D'	'C'	'S1'	53.9474
																		'R'	'D'	'C'	'S1'	61.8421
																		'R'	'D'	'C'	'S1'	51.3158
																		'R'	'D'	'C'	'S1'	61.8421
																		'R'	'D'	'C'	'S1'	56.5789
																		'R'	'D'	'C'	'S1'	48.6842
																		'R'	'D'	'C'	'S1'	56.5789
																		'R'	'D'	'C'	'S1'	52.6316
																		'R'	'D'	'C'	'S1'	59.2105
																		'R'	'D'	'C'	'S1'	57.8947
																		'R'	'D'	'C'	'S1'	61.8421
																		'R'	'D'	'C'	'S1'	68.4211
																		'R'	'D'	'C'	'S1'	63.1579
																		'R'	'D'	'C'	'S1'	57.8947
																		'R'	'D'	'C'	'S1'	61.8421
																		'R'	'D'	'C'	'S1'	56.5789
																		'R'	'D'	'C'	'S1'	61.8421
																		'R'	'D'	'C'	'S1'	55.2632
																		'R'	'D'	'C'	'S1'	59.2105
																		'R'	'D'	'C'	'S1'	51.3158
																		'R'	'D'	'C'	'S1'	61.8421
																		'R'	'D'	'C'	'S1'	67.1053
																		'R'	'D'	'C'	'S1'	61.8421
																		'R'	'D'	'C'	'S1'	55.2632
																		'R'	'D'	'C'	'S1'	47.3684
																		'R'	'D'	'C'	'S1'	60.5263
																		'R'	'D'	'C'	'S1'	53.9474
																		'R'	'D'	'C'	'S1'	51.3158
																		'R'	'D'	'C'	'S1'	55.2632
																		'R'	'D'	'C'	'S1'	65.7895
																		'R'	'D'	'C'	'S1'	65.7895
																		'R'	'D'	'C'	'S1'	59.2105
																		'R'	'D'	'C'	'S1'	60.5263
																		'R'	'D'	'C'	'S1'	55.2632
																		'R'	'D'	'C'	'S1'	59.2105
																		'R'	'D'	'C'	'S1'	55.2632
																		'R'	'D'	'C'	'S1'	61.8421
																		'R'	'D'	'C'	'S1'	63.1579
																		'R'	'D'	'C'	'S1'	51.3158
																		'R'	'D'	'C'	'S1'	57.8947
																		'R'	'D'	'C'	'S1'	63.1579
																		'R'	'D'	'C'	'S1'	57.8947
																		'R'	'D'	'C'	'S1'	57.8947
																		'R'	'D'	'C'	'S1'	55.2632
																		'R'	'D'	'C'	'S1'	51.3158
																		'R'	'D'	'C'	'S1'	64.4737
																		'R'	'D'	'C'	'S1'	59.2105
																		'R'	'D'	'C'	'S1'	61.8421
																		'R'	'D'	'C'	'S1'	61.8421
																		'R'	'D'	'C'	'S1'	59.2105
																		'R'	'D'	'C'	'S1'	52.6316
																		'R'	'D'	'C'	'S1'	56.5789
																		'R'	'D'	'C'	'S1'	59.2105
																		'R'	'D'	'C'	'S1'	51.3158
																		'R'	'D'	'C'	'S1'	60.5263
																		'R'	'D'	'C'	'S1'	56.5789
																		'R'	'D'	'C'	'S1'	57.8947
																		'R'	'D'	'C'	'S1'	38.1579
																		'R'	'D'	'C'	'S1'	51.3158
																		'R'	'D'	'C'	'S1'	56.5789
																		'R'	'D'	'C'	'S1'	57.8947
																		'R'	'D'	'C'	'S1'	61.8421
																		'R'	'D'	'C'	'S1'	57.8947
																		'R'	'D'	'C'	'S1'	56.5789
																		'R'	'D'	'C'	'S1'	64.4737
																		'R'	'D'	'C'	'S1'	53.9474
																		'R'	'D'	'NB'	'M1'	65.6716
																		'R'	'D'	'NB'	'M1'	67.1642
																		'R'	'D'	'NB'	'M1'	74.6269
																		'R'	'D'	'NB'	'M1'	62.6866
																		'R'	'D'	'NB'	'M1'	76.1194
																		'R'	'D'	'NB'	'M1'	65.6716
																		'R'	'D'	'NB'	'M1'	67.1642
																		'R'	'D'	'NB'	'M1'	71.6418
																		'R'	'D'	'NB'	'M1'	59.7015
																		'R'	'D'	'NB'	'M1'	65.6716
																		'R'	'D'	'NB'	'M1'	64.1791
																		'R'	'D'	'NB'	'M1'	71.6418
																		'R'	'D'	'NB'	'M1'	58.209
																		'R'	'D'	'NB'	'M1'	64.1791
																		'R'	'D'	'NB'	'M1'	65.6716
																		'R'	'D'	'NB'	'M1'	67.1642
																		'R'	'D'	'NB'	'M1'	58.209
																		'R'	'D'	'NB'	'M1'	59.7015
																		'R'	'D'	'NB'	'M1'	74.6269
																		'R'	'D'	'NB'	'M1'	65.6716
																		'R'	'D'	'NB'	'M1'	58.209
																		'R'	'D'	'NB'	'M1'	58.209
																		'R'	'D'	'NB'	'M1'	61.194
																		'R'	'D'	'NB'	'M1'	74.6269
																		'R'	'D'	'NB'	'M1'	71.6418
																		'R'	'D'	'NB'	'M1'	64.1791
																		'R'	'D'	'NB'	'M1'	62.6866
																		'R'	'D'	'NB'	'M1'	65.6716
																		'R'	'D'	'NB'	'M1'	70.1493
																		'R'	'D'	'NB'	'M1'	64.1791
																		'R'	'D'	'NB'	'M1'	76.1194
																		'R'	'D'	'NB'	'M1'	70.1493
																		'R'	'D'	'NB'	'M1'	71.6418
																		'R'	'D'	'NB'	'M1'	65.6716
																		'R'	'D'	'NB'	'M1'	68.6567
																		'R'	'D'	'NB'	'M1'	67.1642
																		'R'	'D'	'NB'	'M1'	58.209
																		'R'	'D'	'NB'	'M1'	67.1642
																		'R'	'D'	'NB'	'M1'	61.194
																		'R'	'D'	'NB'	'M1'	58.209
																		'R'	'D'	'NB'	'M1'	64.1791
																		'R'	'D'	'NB'	'M1'	58.209
																		'R'	'D'	'NB'	'M1'	65.6716
																		'R'	'D'	'NB'	'M1'	62.6866
																		'R'	'D'	'NB'	'M1'	71.6418
																		'R'	'D'	'NB'	'M1'	68.6567
																		'R'	'D'	'NB'	'M1'	68.6567
																		'R'	'D'	'NB'	'M1'	70.1493
																		'R'	'D'	'NB'	'M1'	64.1791
																		'R'	'D'	'NB'	'M1'	70.1493
																		'R'	'D'	'NB'	'M1'	61.194
																		'R'	'D'	'NB'	'M1'	65.6716
																		'R'	'D'	'NB'	'M1'	65.6716
																		'R'	'D'	'NB'	'M1'	62.6866
																		'R'	'D'	'NB'	'M1'	68.6567
																		'R'	'D'	'NB'	'M1'	71.6418
																		'R'	'D'	'NB'	'M1'	61.194
																		'R'	'D'	'NB'	'M1'	65.6716
																		'R'	'D'	'NB'	'M1'	62.6866
																		'R'	'D'	'NB'	'M1'	73.1343
																		'R'	'D'	'NB'	'M1'	61.194
																		'R'	'D'	'NB'	'M1'	61.194
																		'R'	'D'	'NB'	'M1'	70.1493
																		'R'	'D'	'NB'	'M1'	61.194
																		'R'	'D'	'NB'	'M1'	70.1493
																		'R'	'D'	'NB'	'M1'	61.194
																		'R'	'D'	'NB'	'M1'	56.7164
																		'R'	'D'	'NB'	'M1'	70.1493
																		'R'	'D'	'NB'	'M1'	62.6866
																		'R'	'D'	'NB'	'M1'	65.6716
																		'R'	'D'	'NB'	'M1'	65.6716
																		'R'	'D'	'NB'	'M1'	70.1493
																		'R'	'D'	'NB'	'M1'	59.7015
																		'R'	'D'	'NB'	'M1'	65.6716
																		'R'	'D'	'NB'	'M1'	67.1642
																		'R'	'D'	'NB'	'M1'	65.6716
																		'R'	'D'	'NB'	'M1'	64.1791
																		'R'	'D'	'NB'	'M1'	74.6269
																		'R'	'D'	'NB'	'M1'	59.7015
																		'R'	'D'	'NB'	'M1'	64.1791
																		'R'	'D'	'NB'	'M1'	67.1642
																		'R'	'D'	'NB'	'M1'	67.1642
																		'R'	'D'	'NB'	'M1'	76.1194
																		'R'	'D'	'NB'	'M1'	64.1791
																		'R'	'D'	'NB'	'M1'	76.1194
																		'R'	'D'	'NB'	'M1'	67.1642
																		'R'	'D'	'NB'	'M1'	65.6716
																		'R'	'D'	'NB'	'M1'	68.6567
																		'R'	'D'	'NB'	'M1'	68.6567
																		'R'	'D'	'NB'	'M1'	58.209
																		'R'	'D'	'NB'	'M1'	58.209
																		'R'	'D'	'NB'	'M1'	67.1642
																		'R'	'D'	'NB'	'M1'	56.7164
																		'R'	'D'	'NB'	'M1'	76.1194
																		'R'	'D'	'NB'	'M1'	73.1343
																		'R'	'D'	'NB'	'M1'	71.6418
																		'R'	'D'	'NB'	'M1'	62.6866
																		'R'	'D'	'NB'	'M1'	55.2239
																		'R'	'D'	'NB'	'M1'	73.1343
																		'R'	'D'	'NB'	'M1'	62.6866
																		'R'	'D'	'NB'	'S1'	61.194
																		'R'	'D'	'NB'	'S1'	61.194
																		'R'	'D'	'NB'	'S1'	65.6716
																		'R'	'D'	'NB'	'S1'	61.194
																		'R'	'D'	'NB'	'S1'	64.1791
																		'R'	'D'	'NB'	'S1'	62.6866
																		'R'	'D'	'NB'	'S1'	59.7015
																		'R'	'D'	'NB'	'S1'	67.1642
																		'R'	'D'	'NB'	'S1'	55.2239
																		'R'	'D'	'NB'	'S1'	56.7164
																		'R'	'D'	'NB'	'S1'	52.2388
																		'R'	'D'	'NB'	'S1'	74.6269
																		'R'	'D'	'NB'	'S1'	59.7015
																		'R'	'D'	'NB'	'S1'	53.7313
																		'R'	'D'	'NB'	'S1'	62.6866
																		'R'	'D'	'NB'	'S1'	58.209
																		'R'	'D'	'NB'	'S1'	61.194
																		'R'	'D'	'NB'	'S1'	64.1791
																		'R'	'D'	'NB'	'S1'	55.2239
																		'R'	'D'	'NB'	'S1'	59.7015
																		'R'	'D'	'NB'	'S1'	64.1791
																		'R'	'D'	'NB'	'S1'	55.2239
																		'R'	'D'	'NB'	'S1'	61.194
																		'R'	'D'	'NB'	'S1'	67.1642
																		'R'	'D'	'NB'	'S1'	65.6716
																		'R'	'D'	'NB'	'S1'	67.1642
																		'R'	'D'	'NB'	'S1'	55.2239
																		'R'	'D'	'NB'	'S1'	59.7015
																		'R'	'D'	'NB'	'S1'	67.1642
																		'R'	'D'	'NB'	'S1'	59.7015
																		'R'	'D'	'NB'	'S1'	65.6716
																		'R'	'D'	'NB'	'S1'	64.1791
																		'R'	'D'	'NB'	'S1'	64.1791
																		'R'	'D'	'NB'	'S1'	64.1791
																		'R'	'D'	'NB'	'S1'	64.1791
																		'R'	'D'	'NB'	'S1'	64.1791
																		'R'	'D'	'NB'	'S1'	52.2388
																		'R'	'D'	'NB'	'S1'	53.7313
																		'R'	'D'	'NB'	'S1'	59.7015
																		'R'	'D'	'NB'	'S1'	50.7463
																		'R'	'D'	'NB'	'S1'	47.7612
																		'R'	'D'	'NB'	'S1'	61.194
																		'R'	'D'	'NB'	'S1'	68.6567
																		'R'	'D'	'NB'	'S1'	50.7463
																		'R'	'D'	'NB'	'S1'	62.6866
																		'R'	'D'	'NB'	'S1'	59.7015
																		'R'	'D'	'NB'	'S1'	64.1791
																		'R'	'D'	'NB'	'S1'	59.7015
																		'R'	'D'	'NB'	'S1'	61.194
																		'R'	'D'	'NB'	'S1'	61.194
																		'R'	'D'	'NB'	'S1'	62.6866
																		'R'	'D'	'NB'	'S1'	59.7015
																		'R'	'D'	'NB'	'S1'	62.6866
																		'R'	'D'	'NB'	'S1'	67.1642
																		'R'	'D'	'NB'	'S1'	67.1642
																		'R'	'D'	'NB'	'S1'	56.7164
																		'R'	'D'	'NB'	'S1'	56.7164
																		'R'	'D'	'NB'	'S1'	71.6418
																		'R'	'D'	'NB'	'S1'	59.7015
																		'R'	'D'	'NB'	'S1'	64.1791
																		'R'	'D'	'NB'	'S1'	67.1642
																		'R'	'D'	'NB'	'S1'	59.7015
																		'R'	'D'	'NB'	'S1'	65.6716
																		'R'	'D'	'NB'	'S1'	59.7015
																		'R'	'D'	'NB'	'S1'	64.1791
																		'R'	'D'	'NB'	'S1'	58.209
																		'R'	'D'	'NB'	'S1'	44.7761
																		'R'	'D'	'NB'	'S1'	58.209
																		'R'	'D'	'NB'	'S1'	62.6866
																		'R'	'D'	'NB'	'S1'	64.1791
																		'R'	'D'	'NB'	'S1'	61.194
																		'R'	'D'	'NB'	'S1'	74.6269
																		'R'	'D'	'NB'	'S1'	61.194
																		'R'	'D'	'NB'	'S1'	62.6866
																		'R'	'D'	'NB'	'S1'	56.7164
																		'R'	'D'	'NB'	'S1'	65.6716
																		'R'	'D'	'NB'	'S1'	55.2239
																		'R'	'D'	'NB'	'S1'	67.1642
																		'R'	'D'	'NB'	'S1'	65.6716
																		'R'	'D'	'NB'	'S1'	56.7164
																		'R'	'D'	'NB'	'S1'	55.2239
																		'R'	'D'	'NB'	'S1'	58.209
																		'R'	'D'	'NB'	'S1'	70.1493
																		'R'	'D'	'NB'	'S1'	62.6866
																		'R'	'D'	'NB'	'S1'	59.7015
																		'R'	'D'	'NB'	'S1'	64.1791
																		'R'	'D'	'NB'	'S1'	67.1642
																		'R'	'D'	'NB'	'S1'	59.7015
																		'R'	'D'	'NB'	'S1'	65.6716
																		'R'	'D'	'NB'	'S1'	55.2239
																		'R'	'D'	'NB'	'S1'	62.6866
																		'R'	'D'	'NB'	'S1'	56.7164
																		'R'	'D'	'NB'	'S1'	59.7015
																		'R'	'D'	'NB'	'S1'	64.1791
																		'R'	'D'	'NB'	'S1'	65.6716
																		'R'	'D'	'NB'	'S1'	68.6567
																		'R'	'D'	'NB'	'S1'	64.1791
																		'R'	'D'	'NB'	'S1'	55.2239
																		'R'	'D'	'NB'	'S1'	73.1343
																		'R'	'D'	'NB'	'S1'	65.6716
																		'Y'	'D'	'C'	'M1'	43.1034
																		'Y'	'D'	'C'	'M1'	50
																		'Y'	'D'	'C'	'M1'	43.1034
																		'Y'	'D'	'C'	'M1'	50
																		'Y'	'D'	'C'	'M1'	43.1034
																		'Y'	'D'	'C'	'M1'	50
																		'Y'	'D'	'C'	'M1'	44.8276
																		'Y'	'D'	'C'	'M1'	63.7931
																		'Y'	'D'	'C'	'M1'	41.3793
																		'Y'	'D'	'C'	'M1'	50
																		'Y'	'D'	'C'	'M1'	55.1724
																		'Y'	'D'	'C'	'M1'	55.1724
																		'Y'	'D'	'C'	'M1'	48.2759
																		'Y'	'D'	'C'	'M1'	53.4483
																		'Y'	'D'	'C'	'M1'	46.5517
																		'Y'	'D'	'C'	'M1'	44.8276
																		'Y'	'D'	'C'	'M1'	63.7931
																		'Y'	'D'	'C'	'M1'	60.3448
																		'Y'	'D'	'C'	'M1'	44.8276
																		'Y'	'D'	'C'	'M1'	39.6552
																		'Y'	'D'	'C'	'M1'	58.6207
																		'Y'	'D'	'C'	'M1'	50
																		'Y'	'D'	'C'	'M1'	50
																		'Y'	'D'	'C'	'M1'	43.1034
																		'Y'	'D'	'C'	'M1'	37.931
																		'Y'	'D'	'C'	'M1'	53.4483
																		'Y'	'D'	'C'	'M1'	44.8276
																		'Y'	'D'	'C'	'M1'	48.2759
																		'Y'	'D'	'C'	'M1'	50
																		'Y'	'D'	'C'	'M1'	50
																		'Y'	'D'	'C'	'M1'	39.6552
																		'Y'	'D'	'C'	'M1'	58.6207
																		'Y'	'D'	'C'	'M1'	41.3793
																		'Y'	'D'	'C'	'M1'	62.069
																		'Y'	'D'	'C'	'M1'	67.2414
																		'Y'	'D'	'C'	'M1'	48.2759
																		'Y'	'D'	'C'	'M1'	46.5517
																		'Y'	'D'	'C'	'M1'	46.5517
																		'Y'	'D'	'C'	'M1'	51.7241
																		'Y'	'D'	'C'	'M1'	58.6207
																		'Y'	'D'	'C'	'M1'	44.8276
																		'Y'	'D'	'C'	'M1'	53.4483
																		'Y'	'D'	'C'	'M1'	44.8276
																		'Y'	'D'	'C'	'M1'	50
																		'Y'	'D'	'C'	'M1'	48.2759
																		'Y'	'D'	'C'	'M1'	50
																		'Y'	'D'	'C'	'M1'	50
																		'Y'	'D'	'C'	'M1'	63.7931
																		'Y'	'D'	'C'	'M1'	50
																		'Y'	'D'	'C'	'M1'	60.3448
																		'Y'	'D'	'C'	'M1'	62.069
																		'Y'	'D'	'C'	'M1'	41.3793
																		'Y'	'D'	'C'	'M1'	46.5517
																		'Y'	'D'	'C'	'M1'	46.5517
																		'Y'	'D'	'C'	'M1'	56.8966
																		'Y'	'D'	'C'	'M1'	51.7241
																		'Y'	'D'	'C'	'M1'	44.8276
																		'Y'	'D'	'C'	'M1'	46.5517
																		'Y'	'D'	'C'	'M1'	44.8276
																		'Y'	'D'	'C'	'M1'	55.1724
																		'Y'	'D'	'C'	'M1'	51.7241
																		'Y'	'D'	'C'	'M1'	55.1724
																		'Y'	'D'	'C'	'M1'	51.7241
																		'Y'	'D'	'C'	'M1'	51.7241
																		'Y'	'D'	'C'	'M1'	46.5517
																		'Y'	'D'	'C'	'M1'	50
																		'Y'	'D'	'C'	'M1'	41.3793
																		'Y'	'D'	'C'	'M1'	62.069
																		'Y'	'D'	'C'	'M1'	55.1724
																		'Y'	'D'	'C'	'M1'	60.3448
																		'Y'	'D'	'C'	'M1'	31.0345
																		'Y'	'D'	'C'	'M1'	44.8276
																		'Y'	'D'	'C'	'M1'	53.4483
																		'Y'	'D'	'C'	'M1'	46.5517
																		'Y'	'D'	'C'	'M1'	50
																		'Y'	'D'	'C'	'M1'	53.4483
																		'Y'	'D'	'C'	'M1'	50
																		'Y'	'D'	'C'	'M1'	55.1724
																		'Y'	'D'	'C'	'M1'	53.4483
																		'Y'	'D'	'C'	'M1'	37.931
																		'Y'	'D'	'C'	'M1'	53.4483
																		'Y'	'D'	'C'	'M1'	60.3448
																		'Y'	'D'	'C'	'M1'	58.6207
																		'Y'	'D'	'C'	'M1'	39.6552
																		'Y'	'D'	'C'	'M1'	58.6207
																		'Y'	'D'	'C'	'M1'	36.2069
																		'Y'	'D'	'C'	'M1'	56.8966
																		'Y'	'D'	'C'	'M1'	55.1724
																		'Y'	'D'	'C'	'M1'	55.1724
																		'Y'	'D'	'C'	'M1'	37.931
																		'Y'	'D'	'C'	'M1'	62.069
																		'Y'	'D'	'C'	'M1'	50
																		'Y'	'D'	'C'	'M1'	53.4483
																		'Y'	'D'	'C'	'M1'	60.3448
																		'Y'	'D'	'C'	'M1'	53.4483
																		'Y'	'D'	'C'	'M1'	44.8276
																		'Y'	'D'	'C'	'M1'	34.4828
																		'Y'	'D'	'C'	'M1'	41.3793
																		'Y'	'D'	'C'	'M1'	43.1034
																		'Y'	'D'	'C'	'M1'	60.3448
																		'Y'	'D'	'C'	'S1'	43.1034
																		'Y'	'D'	'C'	'S1'	37.931
																		'Y'	'D'	'C'	'S1'	55.1724
																		'Y'	'D'	'C'	'S1'	51.7241
																		'Y'	'D'	'C'	'S1'	44.8276
																		'Y'	'D'	'C'	'S1'	41.3793
																		'Y'	'D'	'C'	'S1'	32.7586
																		'Y'	'D'	'C'	'S1'	46.5517
																		'Y'	'D'	'C'	'S1'	39.6552
																		'Y'	'D'	'C'	'S1'	50
																		'Y'	'D'	'C'	'S1'	44.8276
																		'Y'	'D'	'C'	'S1'	48.2759
																		'Y'	'D'	'C'	'S1'	51.7241
																		'Y'	'D'	'C'	'S1'	46.5517
																		'Y'	'D'	'C'	'S1'	44.8276
																		'Y'	'D'	'C'	'S1'	46.5517
																		'Y'	'D'	'C'	'S1'	50
																		'Y'	'D'	'C'	'S1'	41.3793
																		'Y'	'D'	'C'	'S1'	39.6552
																		'Y'	'D'	'C'	'S1'	50
																		'Y'	'D'	'C'	'S1'	48.2759
																		'Y'	'D'	'C'	'S1'	36.2069
																		'Y'	'D'	'C'	'S1'	55.1724
																		'Y'	'D'	'C'	'S1'	51.7241
																		'Y'	'D'	'C'	'S1'	44.8276
																		'Y'	'D'	'C'	'S1'	37.931
																		'Y'	'D'	'C'	'S1'	37.931
																		'Y'	'D'	'C'	'S1'	41.3793
																		'Y'	'D'	'C'	'S1'	39.6552
																		'Y'	'D'	'C'	'S1'	48.2759
																		'Y'	'D'	'C'	'S1'	48.2759
																		'Y'	'D'	'C'	'S1'	48.2759
																		'Y'	'D'	'C'	'S1'	62.069
																		'Y'	'D'	'C'	'S1'	37.931
																		'Y'	'D'	'C'	'S1'	56.8966
																		'Y'	'D'	'C'	'S1'	41.3793
																		'Y'	'D'	'C'	'S1'	36.2069
																		'Y'	'D'	'C'	'S1'	32.7586
																		'Y'	'D'	'C'	'S1'	48.2759
																		'Y'	'D'	'C'	'S1'	43.1034
																		'Y'	'D'	'C'	'S1'	41.3793
																		'Y'	'D'	'C'	'S1'	37.931
																		'Y'	'D'	'C'	'S1'	46.5517
																		'Y'	'D'	'C'	'S1'	37.931
																		'Y'	'D'	'C'	'S1'	34.4828
																		'Y'	'D'	'C'	'S1'	51.7241
																		'Y'	'D'	'C'	'S1'	48.2759
																		'Y'	'D'	'C'	'S1'	41.3793
																		'Y'	'D'	'C'	'S1'	39.6552
																		'Y'	'D'	'C'	'S1'	48.2759
																		'Y'	'D'	'C'	'S1'	43.1034
																		'Y'	'D'	'C'	'S1'	48.2759
																		'Y'	'D'	'C'	'S1'	55.1724
																		'Y'	'D'	'C'	'S1'	37.931
																		'Y'	'D'	'C'	'S1'	46.5517
																		'Y'	'D'	'C'	'S1'	43.1034
																		'Y'	'D'	'C'	'S1'	27.5862
																		'Y'	'D'	'C'	'S1'	41.3793
																		'Y'	'D'	'C'	'S1'	46.5517
																		'Y'	'D'	'C'	'S1'	39.6552
																		'Y'	'D'	'C'	'S1'	43.1034
																		'Y'	'D'	'C'	'S1'	50
																		'Y'	'D'	'C'	'S1'	53.4483
																		'Y'	'D'	'C'	'S1'	58.6207
																		'Y'	'D'	'C'	'S1'	36.2069
																		'Y'	'D'	'C'	'S1'	50
																		'Y'	'D'	'C'	'S1'	43.1034
																		'Y'	'D'	'C'	'S1'	56.8966
																		'Y'	'D'	'C'	'S1'	50
																		'Y'	'D'	'C'	'S1'	50
																		'Y'	'D'	'C'	'S1'	50
																		'Y'	'D'	'C'	'S1'	44.8276
																		'Y'	'D'	'C'	'S1'	34.4828
																		'Y'	'D'	'C'	'S1'	39.6552
																		'Y'	'D'	'C'	'S1'	51.7241
																		'Y'	'D'	'C'	'S1'	50
																		'Y'	'D'	'C'	'S1'	39.6552
																		'Y'	'D'	'C'	'S1'	48.2759
																		'Y'	'D'	'C'	'S1'	43.1034
																		'Y'	'D'	'C'	'S1'	43.1034
																		'Y'	'D'	'C'	'S1'	39.6552
																		'Y'	'D'	'C'	'S1'	37.931
																		'Y'	'D'	'C'	'S1'	44.8276
																		'Y'	'D'	'C'	'S1'	37.931
																		'Y'	'D'	'C'	'S1'	43.1034
																		'Y'	'D'	'C'	'S1'	43.1034
																		'Y'	'D'	'C'	'S1'	44.8276
																		'Y'	'D'	'C'	'S1'	39.6552
																		'Y'	'D'	'C'	'S1'	43.1034
																		'Y'	'D'	'C'	'S1'	41.3793
																		'Y'	'D'	'C'	'S1'	31.0345
																		'Y'	'D'	'C'	'S1'	41.3793
																		'Y'	'D'	'C'	'S1'	48.2759
																		'Y'	'D'	'C'	'S1'	51.7241
																		'Y'	'D'	'C'	'S1'	60.3448
																		'Y'	'D'	'C'	'S1'	39.6552
																		'Y'	'D'	'C'	'S1'	44.8276
																		'Y'	'D'	'C'	'S1'	34.4828
																		'Y'	'D'	'C'	'S1'	36.2069
																		'Y'	'D'	'C'	'S1'	46.5517
																		'Y'	'D'	'NB'	'M1'	50
																		'Y'	'D'	'NB'	'M1'	51.3514
																		'Y'	'D'	'NB'	'M1'	43.2432
																		'Y'	'D'	'NB'	'M1'	40.5405
																		'Y'	'D'	'NB'	'M1'	37.8378
																		'Y'	'D'	'NB'	'M1'	51.3514
																		'Y'	'D'	'NB'	'M1'	43.2432
																		'Y'	'D'	'NB'	'M1'	45.9459
																		'Y'	'D'	'NB'	'M1'	43.2432
																		'Y'	'D'	'NB'	'M1'	62.1622
																		'Y'	'D'	'NB'	'M1'	41.8919
																		'Y'	'D'	'NB'	'M1'	45.9459
																		'Y'	'D'	'NB'	'M1'	62.1622
																		'Y'	'D'	'NB'	'M1'	37.8378
																		'Y'	'D'	'NB'	'M1'	44.5946
																		'Y'	'D'	'NB'	'M1'	39.1892
																		'Y'	'D'	'NB'	'M1'	36.4865
																		'Y'	'D'	'NB'	'M1'	45.9459
																		'Y'	'D'	'NB'	'M1'	48.6486
																		'Y'	'D'	'NB'	'M1'	39.1892
																		'Y'	'D'	'NB'	'M1'	50
																		'Y'	'D'	'NB'	'M1'	45.9459
																		'Y'	'D'	'NB'	'M1'	47.2973
																		'Y'	'D'	'NB'	'M1'	47.2973
																		'Y'	'D'	'NB'	'M1'	48.6486
																		'Y'	'D'	'NB'	'M1'	47.2973
																		'Y'	'D'	'NB'	'M1'	47.2973
																		'Y'	'D'	'NB'	'M1'	36.4865
																		'Y'	'D'	'NB'	'M1'	48.6486
																		'Y'	'D'	'NB'	'M1'	45.9459
																		'Y'	'D'	'NB'	'M1'	50
																		'Y'	'D'	'NB'	'M1'	45.9459
																		'Y'	'D'	'NB'	'M1'	41.8919
																		'Y'	'D'	'NB'	'M1'	47.2973
																		'Y'	'D'	'NB'	'M1'	43.2432
																		'Y'	'D'	'NB'	'M1'	33.7838
																		'Y'	'D'	'NB'	'M1'	44.5946
																		'Y'	'D'	'NB'	'M1'	35.1351
																		'Y'	'D'	'NB'	'M1'	52.7027
																		'Y'	'D'	'NB'	'M1'	40.5405
																		'Y'	'D'	'NB'	'M1'	52.7027
																		'Y'	'D'	'NB'	'M1'	40.5405
																		'Y'	'D'	'NB'	'M1'	56.7568
																		'Y'	'D'	'NB'	'M1'	54.0541
																		'Y'	'D'	'NB'	'M1'	41.8919
																		'Y'	'D'	'NB'	'M1'	50
																		'Y'	'D'	'NB'	'M1'	50
																		'Y'	'D'	'NB'	'M1'	43.2432
																		'Y'	'D'	'NB'	'M1'	54.0541
																		'Y'	'D'	'NB'	'M1'	50
																		'Y'	'D'	'NB'	'M1'	44.5946
																		'Y'	'D'	'NB'	'M1'	40.5405
																		'Y'	'D'	'NB'	'M1'	45.9459
																		'Y'	'D'	'NB'	'M1'	41.8919
																		'Y'	'D'	'NB'	'M1'	52.7027
																		'Y'	'D'	'NB'	'M1'	45.9459
																		'Y'	'D'	'NB'	'M1'	47.2973
																		'Y'	'D'	'NB'	'M1'	45.9459
																		'Y'	'D'	'NB'	'M1'	54.0541
																		'Y'	'D'	'NB'	'M1'	43.2432
																		'Y'	'D'	'NB'	'M1'	50
																		'Y'	'D'	'NB'	'M1'	44.5946
																		'Y'	'D'	'NB'	'M1'	39.1892
																		'Y'	'D'	'NB'	'M1'	43.2432
																		'Y'	'D'	'NB'	'M1'	36.4865
																		'Y'	'D'	'NB'	'M1'	43.2432
																		'Y'	'D'	'NB'	'M1'	50
																		'Y'	'D'	'NB'	'M1'	48.6486
																		'Y'	'D'	'NB'	'M1'	35.1351
																		'Y'	'D'	'NB'	'M1'	51.3514
																		'Y'	'D'	'NB'	'M1'	50
																		'Y'	'D'	'NB'	'M1'	62.1622
																		'Y'	'D'	'NB'	'M1'	48.6486
																		'Y'	'D'	'NB'	'M1'	48.6486
																		'Y'	'D'	'NB'	'M1'	39.1892
																		'Y'	'D'	'NB'	'M1'	52.7027
																		'Y'	'D'	'NB'	'M1'	41.8919
																		'Y'	'D'	'NB'	'M1'	47.2973
																		'Y'	'D'	'NB'	'M1'	47.2973
																		'Y'	'D'	'NB'	'M1'	43.2432
																		'Y'	'D'	'NB'	'M1'	55.4054
																		'Y'	'D'	'NB'	'M1'	54.0541
																		'Y'	'D'	'NB'	'M1'	54.0541
																		'Y'	'D'	'NB'	'M1'	45.9459
																		'Y'	'D'	'NB'	'M1'	51.3514
																		'Y'	'D'	'NB'	'M1'	37.8378
																		'Y'	'D'	'NB'	'M1'	45.9459
																		'Y'	'D'	'NB'	'M1'	48.6486
																		'Y'	'D'	'NB'	'M1'	45.9459
																		'Y'	'D'	'NB'	'M1'	48.6486
																		'Y'	'D'	'NB'	'M1'	39.1892
																		'Y'	'D'	'NB'	'M1'	48.6486
																		'Y'	'D'	'NB'	'M1'	48.6486
																		'Y'	'D'	'NB'	'M1'	47.2973
																		'Y'	'D'	'NB'	'M1'	44.5946
																		'Y'	'D'	'NB'	'M1'	45.9459
																		'Y'	'D'	'NB'	'M1'	43.2432
																		'Y'	'D'	'NB'	'M1'	44.5946
																		'Y'	'D'	'NB'	'M1'	52.7027
																		'Y'	'D'	'NB'	'M1'	52.7027
																		'Y'	'D'	'NB'	'S1'	47.2973
																		'Y'	'D'	'NB'	'S1'	43.2432
																		'Y'	'D'	'NB'	'S1'	51.3514
																		'Y'	'D'	'NB'	'S1'	44.5946
																		'Y'	'D'	'NB'	'S1'	51.3514
																		'Y'	'D'	'NB'	'S1'	45.9459
																		'Y'	'D'	'NB'	'S1'	44.5946
																		'Y'	'D'	'NB'	'S1'	48.6486
																		'Y'	'D'	'NB'	'S1'	43.2432
																		'Y'	'D'	'NB'	'S1'	48.6486
																		'Y'	'D'	'NB'	'S1'	36.4865
																		'Y'	'D'	'NB'	'S1'	51.3514
																		'Y'	'D'	'NB'	'S1'	47.2973
																		'Y'	'D'	'NB'	'S1'	44.5946
																		'Y'	'D'	'NB'	'S1'	39.1892
																		'Y'	'D'	'NB'	'S1'	48.6486
																		'Y'	'D'	'NB'	'S1'	45.9459
																		'Y'	'D'	'NB'	'S1'	51.3514
																		'Y'	'D'	'NB'	'S1'	54.0541
																		'Y'	'D'	'NB'	'S1'	45.9459
																		'Y'	'D'	'NB'	'S1'	50
																		'Y'	'D'	'NB'	'S1'	50
																		'Y'	'D'	'NB'	'S1'	36.4865
																		'Y'	'D'	'NB'	'S1'	43.2432
																		'Y'	'D'	'NB'	'S1'	51.3514
																		'Y'	'D'	'NB'	'S1'	41.8919
																		'Y'	'D'	'NB'	'S1'	51.3514
																		'Y'	'D'	'NB'	'S1'	44.5946
																		'Y'	'D'	'NB'	'S1'	39.1892
																		'Y'	'D'	'NB'	'S1'	41.8919
																		'Y'	'D'	'NB'	'S1'	36.4865
																		'Y'	'D'	'NB'	'S1'	36.4865
																		'Y'	'D'	'NB'	'S1'	41.8919
																		'Y'	'D'	'NB'	'S1'	40.5405
																		'Y'	'D'	'NB'	'S1'	48.6486
																		'Y'	'D'	'NB'	'S1'	41.8919
																		'Y'	'D'	'NB'	'S1'	54.0541
																		'Y'	'D'	'NB'	'S1'	35.1351
																		'Y'	'D'	'NB'	'S1'	47.2973
																		'Y'	'D'	'NB'	'S1'	43.2432
																		'Y'	'D'	'NB'	'S1'	50
																		'Y'	'D'	'NB'	'S1'	39.1892
																		'Y'	'D'	'NB'	'S1'	56.7568
																		'Y'	'D'	'NB'	'S1'	41.8919
																		'Y'	'D'	'NB'	'S1'	35.1351
																		'Y'	'D'	'NB'	'S1'	44.5946
																		'Y'	'D'	'NB'	'S1'	45.9459
																		'Y'	'D'	'NB'	'S1'	43.2432
																		'Y'	'D'	'NB'	'S1'	47.2973
																		'Y'	'D'	'NB'	'S1'	40.5405
																		'Y'	'D'	'NB'	'S1'	48.6486
																		'Y'	'D'	'NB'	'S1'	48.6486
																		'Y'	'D'	'NB'	'S1'	50
																		'Y'	'D'	'NB'	'S1'	41.8919
																		'Y'	'D'	'NB'	'S1'	48.6486
																		'Y'	'D'	'NB'	'S1'	47.2973
																		'Y'	'D'	'NB'	'S1'	39.1892
																		'Y'	'D'	'NB'	'S1'	41.8919
																		'Y'	'D'	'NB'	'S1'	40.5405
																		'Y'	'D'	'NB'	'S1'	45.9459
																		'Y'	'D'	'NB'	'S1'	44.5946
																		'Y'	'D'	'NB'	'S1'	45.9459
																		'Y'	'D'	'NB'	'S1'	44.5946
																		'Y'	'D'	'NB'	'S1'	36.4865
																		'Y'	'D'	'NB'	'S1'	48.6486
																		'Y'	'D'	'NB'	'S1'	43.2432
																		'Y'	'D'	'NB'	'S1'	39.1892
																		'Y'	'D'	'NB'	'S1'	54.0541
																		'Y'	'D'	'NB'	'S1'	47.2973
																		'Y'	'D'	'NB'	'S1'	54.0541
																		'Y'	'D'	'NB'	'S1'	44.5946
																		'Y'	'D'	'NB'	'S1'	45.9459
																		'Y'	'D'	'NB'	'S1'	58.1081
																		'Y'	'D'	'NB'	'S1'	44.5946
																		'Y'	'D'	'NB'	'S1'	47.2973
																		'Y'	'D'	'NB'	'S1'	45.9459
																		'Y'	'D'	'NB'	'S1'	48.6486
																		'Y'	'D'	'NB'	'S1'	48.6486
																		'Y'	'D'	'NB'	'S1'	48.6486
																		'Y'	'D'	'NB'	'S1'	36.4865
																		'Y'	'D'	'NB'	'S1'	50
																		'Y'	'D'	'NB'	'S1'	48.6486
																		'Y'	'D'	'NB'	'S1'	55.4054
																		'Y'	'D'	'NB'	'S1'	47.2973
																		'Y'	'D'	'NB'	'S1'	44.5946
																		'Y'	'D'	'NB'	'S1'	45.9459
																		'Y'	'D'	'NB'	'S1'	52.7027
																		'Y'	'D'	'NB'	'S1'	48.6486
																		'Y'	'D'	'NB'	'S1'	47.2973
																		'Y'	'D'	'NB'	'S1'	47.2973
																		'Y'	'D'	'NB'	'S1'	40.5405
																		'Y'	'D'	'NB'	'S1'	44.5946
																		'Y'	'D'	'NB'	'S1'	39.1892
																		'Y'	'D'	'NB'	'S1'	58.1081
																		'Y'	'D'	'NB'	'S1'	51.3514
																		'Y'	'D'	'NB'	'S1'	45.9459
																		'Y'	'D'	'NB'	'S1'	41.8919
																		'Y'	'D'	'NB'	'S1'	45.9459
																		'Y'	'D'	'NB'	'S1'	52.7027
																		'Y'	'D'	'NB'	'S1'	48.6486
