# Supplementary material for: 3D directional tuning in the orofacial sensorimotor cortex during natural feeding and drinking
Source: eLife. 2025 Oct 21;13:RP101325. doi: 10.7554/eLife.101325 (PMC12539803; doi:10.7554/eLife.101325)
Supplement: Figure 13—source data 1. [file elife-101325-fig13-data1.xlsx]

## Sheet: Sheet1
Figure 13 - Source Data 1
Figure 13A: KNN decoding performance
	Decoding Accuracies																	Linear regression model with interactions
	Feeding R Control		Feeding R Nerve Block		Feeding Y Control		Feeding Y Nerve Block		Drinking R Control		Drinking R Nerve Block		Drinking Y Control		Drinking Y Nerve Block			Independent variables	Coefficient	ste	t-stat	p-value
	MIo	SIo	MIo	SIo	MIo	SIo	MIo	SIo	MIo	SIo	MIo	SIo	MIo	SIo	MIo	SIo		Animal	-4.3858	0.78726	-5.571	2.9695e-08
	44.4444	44.4444	40.7407	48.1481	40.7407	59.2593	33.3333	33.3333	59.2105	55.2632	65.6716	61.194	43.1034	43.1034	50	47.2973		Behavior	11.329	0.78726	14.391	3.1276e-44
	48.1481	33.3333	59.2593	44.4444	59.2593	29.6296	55.5556	25.9259	72.3684	57.8947	67.1642	61.194	50	37.931	51.3514	43.2432		Condition	-5.4339	0.78726	-6.9023	7.3678e-12
	48.1481	44.4444	48.1481	48.1481	62.963	37.037	33.3333	29.6296	61.8421	60.5263	74.6269	65.6716	43.1034	55.1724	43.2432	51.3514		Region	-13.555	0.78726	-17.218	4.7344e-61
	55.5556	44.4444	55.5556	48.1481	40.7407	33.3333	37.037	14.8148	61.8421	63.1579	62.6866	61.194	50	51.7241	40.5405	44.5946		Animal:Behavior	-12.707	0.78726	-16.141	2.1633e-54
	44.4444	37.037	51.8519	40.7407	55.5556	40.7407	37.037	37.037	76.3158	60.5263	76.1194	64.1791	43.1034	44.8276	37.8378	51.3514		Animal:Condition	-2.4483	0.78726	-3.1099	0.001905
	40.7407	37.037	59.2593	33.3333	48.1481	37.037	29.6296	48.1481	64.4737	51.3158	65.6716	62.6866	50	41.3793	51.3514	45.9459		Animal:Region	3.2384	0.78726	4.1136	4.0952e-05
	59.2593	40.7407	55.5556	40.7407	55.5556	44.4444	51.8519	18.5185	75	51.3158	67.1642	59.7015	44.8276	32.7586	43.2432	44.5946		Behavior:Condition	4.994	0.78726	6.3435	2.9209e-10
	66.6667	55.5556	40.7407	59.2593	62.963	51.8519	44.4444	25.9259	77.6316	63.1579	71.6418	67.1642	63.7931	46.5517	45.9459	48.6486		Behavior:Region	5.475	0.78726	6.9545	5.1504e-12
	51.8519	40.7407	44.4444	33.3333	33.3333	44.4444	44.4444	51.8519	61.8421	55.2632	59.7015	55.2239	41.3793	39.6552	43.2432	43.2432		Condition:Region	2.6679	0.78726	3.3889	0.00071889
	55.5556	33.3333	62.963	29.6296	48.1481	51.8519	44.4444	51.8519	59.2105	51.3158	65.6716	56.7164	50	50	62.1622	48.6486		Constant	55.735
	55.5556	55.5556	37.037	29.6296	48.1481	33.3333	37.037	37.037	82.8947	63.1579	64.1791	52.2388	55.1724	44.8276	41.8919	36.4865		R2 = 0.578
	48.1481	48.1481	51.8519	33.3333	44.4444	40.7407	44.4444	59.2593	73.6842	61.8421	71.6418	74.6269	55.1724	48.2759	45.9459	51.3514		F-ratio = 220
	51.8519	55.5556	40.7407	40.7407	51.8519	40.7407	44.4444	51.8519	82.8947	63.1579	58.209	59.7015	48.2759	51.7241	62.1622	47.2973		n = 1600
	44.4444	44.4444	55.5556	37.037	55.5556	40.7407	48.1481	44.4444	73.6842	61.8421	64.1791	53.7313	53.4483	46.5517	37.8378	44.5946
	62.963	44.4444	59.2593	55.5556	44.4444	44.4444	44.4444	40.7407	76.3158	60.5263	65.6716	62.6866	46.5517	44.8276	44.5946	39.1892		Input table
	55.5556	40.7407	55.5556	40.7407	62.963	48.1481	70.3704	44.4444	72.3684	69.7368	67.1642	58.209	44.8276	46.5517	39.1892	48.6486		Animal	Behavior	Condition	Region	Accuracy
	66.6667	51.8519	40.7407	40.7407	55.5556	37.037	51.8519	22.2222	78.9474	60.5263	58.209	61.194	63.7931	50	36.4865	45.9459		'R'	'F'	'C'	'M1'	44.4444
	70.3704	33.3333	51.8519	48.1481	55.5556	44.4444	66.6667	29.6296	64.4737	64.4737	59.7015	64.1791	60.3448	41.3793	45.9459	51.3514		'R'	'F'	'C'	'M1'	48.1481
	51.8519	40.7407	44.4444	33.3333	55.5556	29.6296	37.037	33.3333	65.7895	65.7895	74.6269	55.2239	44.8276	39.6552	48.6486	54.0541		'R'	'F'	'C'	'M1'	48.1481
	62.963	44.4444	51.8519	29.6296	48.1481	33.3333	44.4444	25.9259	59.2105	55.2632	65.6716	59.7015	39.6552	50	39.1892	45.9459		'R'	'F'	'C'	'M1'	55.5556
	51.8519	40.7407	66.6667	40.7407	55.5556	44.4444	37.037	18.5185	53.9474	55.2632	58.209	64.1791	58.6207	48.2759	50	50		'R'	'F'	'C'	'M1'	44.4444
	37.037	40.7407	40.7407	33.3333	62.963	29.6296	40.7407	44.4444	65.7895	65.7895	58.209	55.2239	50	36.2069	45.9459	50		'R'	'F'	'C'	'M1'	40.7407
	40.7407	59.2593	51.8519	40.7407	51.8519	37.037	37.037	29.6296	77.6316	63.1579	61.194	61.194	50	55.1724	47.2973	36.4865		'R'	'F'	'C'	'M1'	59.2593
	40.7407	29.6296	37.037	37.037	48.1481	44.4444	37.037	29.6296	71.0526	57.8947	74.6269	67.1642	43.1034	51.7241	47.2973	43.2432		'R'	'F'	'C'	'M1'	66.6667
	62.963	48.1481	55.5556	51.8519	51.8519	55.5556	37.037	37.037	61.8421	61.8421	71.6418	65.6716	37.931	44.8276	48.6486	51.3514		'R'	'F'	'C'	'M1'	51.8519
	51.8519	37.037	37.037	37.037	51.8519	33.3333	22.2222	44.4444	73.6842	57.8947	64.1791	67.1642	53.4483	37.931	47.2973	41.8919		'R'	'F'	'C'	'M1'	55.5556
	77.7778	55.5556	51.8519	37.037	40.7407	44.4444	33.3333	33.3333	60.5263	50	62.6866	55.2239	44.8276	37.931	47.2973	51.3514		'R'	'F'	'C'	'M1'	55.5556
	48.1481	22.2222	59.2593	37.037	51.8519	48.1481	44.4444	40.7407	65.7895	52.6316	65.6716	59.7015	48.2759	41.3793	36.4865	44.5946		'R'	'F'	'C'	'M1'	48.1481
	62.963	48.1481	66.6667	25.9259	55.5556	51.8519	44.4444	33.3333	69.7368	55.2632	70.1493	67.1642	50	39.6552	48.6486	39.1892		'R'	'F'	'C'	'M1'	51.8519
	44.4444	40.7407	51.8519	22.2222	59.2593	55.5556	44.4444	33.3333	67.1053	61.8421	64.1791	59.7015	50	48.2759	45.9459	41.8919		'R'	'F'	'C'	'M1'	44.4444
	51.8519	44.4444	55.5556	37.037	37.037	37.037	48.1481	29.6296	59.2105	65.7895	76.1194	65.6716	39.6552	48.2759	50	36.4865		'R'	'F'	'C'	'M1'	62.963
	44.4444	48.1481	59.2593	40.7407	48.1481	37.037	59.2593	40.7407	76.3158	59.2105	70.1493	64.1791	58.6207	48.2759	45.9459	36.4865		'R'	'F'	'C'	'M1'	55.5556
	62.963	44.4444	51.8519	37.037	40.7407	51.8519	33.3333	25.9259	51.3158	56.5789	71.6418	64.1791	41.3793	62.069	41.8919	41.8919		'R'	'F'	'C'	'M1'	66.6667
	48.1481	44.4444	37.037	29.6296	48.1481	48.1481	29.6296	33.3333	65.7895	61.8421	65.6716	64.1791	62.069	37.931	47.2973	40.5405		'R'	'F'	'C'	'M1'	70.3704
	62.963	44.4444	37.037	37.037	37.037	29.6296	55.5556	37.037	53.9474	53.9474	68.6567	64.1791	67.2414	56.8966	43.2432	48.6486		'R'	'F'	'C'	'M1'	51.8519
	44.4444	40.7407	40.7407	48.1481	48.1481	37.037	40.7407	33.3333	68.4211	61.8421	67.1642	64.1791	48.2759	41.3793	33.7838	41.8919		'R'	'F'	'C'	'M1'	62.963
	62.963	40.7407	55.5556	22.2222	51.8519	29.6296	37.037	25.9259	51.3158	51.3158	58.209	52.2388	46.5517	36.2069	44.5946	54.0541		'R'	'F'	'C'	'M1'	51.8519
	59.2593	48.1481	55.5556	29.6296	51.8519	37.037	22.2222	29.6296	63.1579	61.8421	67.1642	53.7313	46.5517	32.7586	35.1351	35.1351		'R'	'F'	'C'	'M1'	37.037
	59.2593	40.7407	33.3333	40.7407	51.8519	44.4444	48.1481	44.4444	77.6316	56.5789	61.194	59.7015	51.7241	48.2759	52.7027	47.2973		'R'	'F'	'C'	'M1'	40.7407
	62.963	33.3333	37.037	40.7407	59.2593	33.3333	48.1481	25.9259	64.4737	48.6842	58.209	50.7463	58.6207	43.1034	40.5405	43.2432		'R'	'F'	'C'	'M1'	40.7407
	55.5556	44.4444	59.2593	40.7407	59.2593	37.037	51.8519	33.3333	63.1579	56.5789	64.1791	47.7612	44.8276	41.3793	52.7027	50		'R'	'F'	'C'	'M1'	62.963
	62.963	59.2593	66.6667	48.1481	40.7407	48.1481	51.8519	40.7407	67.1053	52.6316	58.209	61.194	53.4483	37.931	40.5405	39.1892		'R'	'F'	'C'	'M1'	51.8519
	51.8519	51.8519	44.4444	40.7407	55.5556	37.037	44.4444	33.3333	75	59.2105	65.6716	68.6567	44.8276	46.5517	56.7568	56.7568		'R'	'F'	'C'	'M1'	77.7778
	59.2593	44.4444	59.2593	40.7407	55.5556	51.8519	48.1481	44.4444	72.3684	57.8947	62.6866	50.7463	50	37.931	54.0541	41.8919		'R'	'F'	'C'	'M1'	48.1481
	70.3704	37.037	40.7407	44.4444	37.037	29.6296	62.963	48.1481	67.1053	61.8421	71.6418	62.6866	48.2759	34.4828	41.8919	35.1351		'R'	'F'	'C'	'M1'	62.963
	59.2593	51.8519	51.8519	40.7407	66.6667	25.9259	44.4444	44.4444	77.6316	68.4211	68.6567	59.7015	50	51.7241	50	44.5946		'R'	'F'	'C'	'M1'	44.4444
	59.2593	25.9259	48.1481	51.8519	40.7407	37.037	44.4444	33.3333	76.3158	63.1579	68.6567	64.1791	50	48.2759	50	45.9459		'R'	'F'	'C'	'M1'	51.8519
	55.5556	44.4444	44.4444	44.4444	55.5556	29.6296	62.963	29.6296	63.1579	57.8947	70.1493	59.7015	63.7931	41.3793	43.2432	43.2432		'R'	'F'	'C'	'M1'	44.4444
	37.037	33.3333	59.2593	40.7407	44.4444	25.9259	48.1481	25.9259	73.6842	61.8421	64.1791	61.194	50	39.6552	54.0541	47.2973		'R'	'F'	'C'	'M1'	62.963
	62.963	59.2593	51.8519	25.9259	40.7407	44.4444	55.5556	29.6296	80.2632	56.5789	70.1493	61.194	60.3448	48.2759	50	40.5405		'R'	'F'	'C'	'M1'	48.1481
	51.8519	37.037	62.963	37.037	48.1481	48.1481	62.963	33.3333	59.2105	61.8421	61.194	62.6866	62.069	43.1034	44.5946	48.6486		'R'	'F'	'C'	'M1'	62.963
	55.5556	29.6296	48.1481	33.3333	44.4444	55.5556	29.6296	37.037	73.6842	55.2632	65.6716	59.7015	41.3793	48.2759	40.5405	48.6486		'R'	'F'	'C'	'M1'	44.4444
	70.3704	44.4444	62.963	40.7407	59.2593	48.1481	33.3333	37.037	71.0526	59.2105	65.6716	62.6866	46.5517	55.1724	45.9459	50		'R'	'F'	'C'	'M1'	62.963
	66.6667	25.9259	62.963	37.037	44.4444	51.8519	51.8519	25.9259	67.1053	51.3158	62.6866	67.1642	46.5517	37.931	41.8919	41.8919		'R'	'F'	'C'	'M1'	59.2593
	59.2593	25.9259	51.8519	44.4444	37.037	59.2593	33.3333	25.9259	73.6842	61.8421	68.6567	67.1642	56.8966	46.5517	52.7027	48.6486		'R'	'F'	'C'	'M1'	59.2593
	51.8519	48.1481	40.7407	44.4444	48.1481	40.7407	37.037	37.037	65.7895	67.1053	71.6418	56.7164	51.7241	43.1034	45.9459	47.2973		'R'	'F'	'C'	'M1'	62.963
	59.2593	37.037	29.6296	62.963	51.8519	29.6296	48.1481	48.1481	64.4737	61.8421	61.194	56.7164	44.8276	27.5862	47.2973	39.1892		'R'	'F'	'C'	'M1'	55.5556
	62.963	33.3333	66.6667	51.8519	62.963	48.1481	40.7407	25.9259	75	55.2632	65.6716	71.6418	46.5517	41.3793	45.9459	41.8919		'R'	'F'	'C'	'M1'	62.963
	55.5556	48.1481	62.963	44.4444	55.5556	40.7407	51.8519	33.3333	69.7368	47.3684	62.6866	59.7015	44.8276	46.5517	54.0541	40.5405		'R'	'F'	'C'	'M1'	51.8519
	40.7407	40.7407	55.5556	22.2222	44.4444	40.7407	44.4444	33.3333	67.1053	60.5263	73.1343	64.1791	55.1724	39.6552	43.2432	45.9459		'R'	'F'	'C'	'M1'	59.2593
	59.2593	40.7407	44.4444	33.3333	48.1481	51.8519	33.3333	22.2222	63.1579	53.9474	61.194	67.1642	51.7241	43.1034	50	44.5946		'R'	'F'	'C'	'M1'	70.3704
	44.4444	59.2593	70.3704	29.6296	59.2593	40.7407	48.1481	25.9259	73.6842	51.3158	61.194	59.7015	55.1724	50	44.5946	45.9459		'R'	'F'	'C'	'M1'	59.2593
	55.5556	48.1481	51.8519	40.7407	44.4444	29.6296	44.4444	33.3333	60.5263	55.2632	70.1493	65.6716	51.7241	53.4483	39.1892	44.5946		'R'	'F'	'C'	'M1'	59.2593
	40.7407	40.7407	48.1481	44.4444	48.1481	44.4444	44.4444	25.9259	81.5789	65.7895	61.194	59.7015	51.7241	58.6207	43.2432	36.4865		'R'	'F'	'C'	'M1'	55.5556
	62.963	44.4444	22.2222	40.7407	40.7407	18.5185	44.4444	40.7407	67.1053	65.7895	70.1493	64.1791	46.5517	36.2069	36.4865	48.6486		'R'	'F'	'C'	'M1'	37.037
	40.7407	55.5556	40.7407	25.9259	48.1481	25.9259	62.963	25.9259	82.8947	59.2105	61.194	58.209	50	50	43.2432	43.2432		'R'	'F'	'C'	'M1'	62.963
	29.6296	55.5556	48.1481	29.6296	44.4444	33.3333	40.7407	40.7407	73.6842	60.5263	56.7164	44.7761	41.3793	43.1034	50	39.1892		'R'	'F'	'C'	'M1'	51.8519
	55.5556	44.4444	55.5556	44.4444	44.4444	55.5556	37.037	11.1111	72.3684	55.2632	70.1493	58.209	62.069	56.8966	48.6486	54.0541		'R'	'F'	'C'	'M1'	55.5556
	44.4444	48.1481	66.6667	29.6296	51.8519	37.037	48.1481	33.3333	65.7895	59.2105	62.6866	62.6866	55.1724	50	35.1351	47.2973		'R'	'F'	'C'	'M1'	70.3704
	44.4444	44.4444	40.7407	44.4444	40.7407	51.8519	59.2593	44.4444	52.6316	55.2632	65.6716	64.1791	60.3448	50	51.3514	54.0541		'R'	'F'	'C'	'M1'	66.6667
	55.5556	37.037	51.8519	51.8519	44.4444	40.7407	33.3333	40.7407	69.7368	61.8421	65.6716	61.194	31.0345	50	50	44.5946		'R'	'F'	'C'	'M1'	59.2593
	66.6667	48.1481	44.4444	40.7407	55.5556	48.1481	44.4444	29.6296	78.9474	63.1579	70.1493	74.6269	44.8276	44.8276	62.1622	45.9459		'R'	'F'	'C'	'M1'	51.8519
	55.5556	33.3333	55.5556	40.7407	51.8519	48.1481	44.4444	44.4444	69.7368	51.3158	59.7015	61.194	53.4483	34.4828	48.6486	58.1081		'R'	'F'	'C'	'M1'	59.2593
	55.5556	55.5556	51.8519	40.7407	62.963	59.2593	40.7407	29.6296	60.5263	57.8947	65.6716	62.6866	46.5517	39.6552	48.6486	44.5946		'R'	'F'	'C'	'M1'	62.963
	74.0741	44.4444	40.7407	48.1481	62.963	48.1481	48.1481	25.9259	67.1053	63.1579	67.1642	56.7164	50	51.7241	39.1892	47.2973		'R'	'F'	'C'	'M1'	55.5556
	48.1481	37.037	70.3704	37.037	40.7407	40.7407	62.963	51.8519	60.5263	57.8947	65.6716	65.6716	53.4483	50	52.7027	45.9459		'R'	'F'	'C'	'M1'	40.7407
	55.5556	48.1481	40.7407	22.2222	62.963	40.7407	55.5556	25.9259	64.4737	57.8947	64.1791	55.2239	50	39.6552	41.8919	48.6486		'R'	'F'	'C'	'M1'	59.2593
	59.2593	55.5556	59.2593	40.7407	55.5556	37.037	48.1481	44.4444	72.3684	55.2632	74.6269	67.1642	55.1724	48.2759	47.2973	48.6486		'R'	'F'	'C'	'M1'	44.4444
	62.963	44.4444	62.963	44.4444	48.1481	29.6296	37.037	25.9259	61.8421	51.3158	59.7015	65.6716	53.4483	43.1034	47.2973	48.6486		'R'	'F'	'C'	'M1'	55.5556
	51.8519	40.7407	55.5556	25.9259	48.1481	33.3333	55.5556	37.037	75	64.4737	64.1791	56.7164	37.931	43.1034	43.2432	36.4865		'R'	'F'	'C'	'M1'	40.7407
	59.2593	37.037	59.2593	40.7407	51.8519	40.7407	40.7407	22.2222	60.5263	59.2105	67.1642	55.2239	53.4483	39.6552	55.4054	50		'R'	'F'	'C'	'M1'	62.963
	37.037	40.7407	48.1481	25.9259	70.3704	62.963	55.5556	33.3333	69.7368	61.8421	67.1642	58.209	60.3448	37.931	54.0541	48.6486		'R'	'F'	'C'	'M1'	40.7407
	51.8519	40.7407	51.8519	37.037	44.4444	44.4444	44.4444	29.6296	67.1053	61.8421	76.1194	70.1493	58.6207	44.8276	54.0541	55.4054		'R'	'F'	'C'	'M1'	29.6296
	74.0741	40.7407	37.037	51.8519	37.037	44.4444	44.4444	29.6296	57.8947	59.2105	64.1791	62.6866	39.6552	37.931	45.9459	47.2973		'R'	'F'	'C'	'M1'	55.5556
	40.7407	37.037	22.2222	33.3333	59.2593	33.3333	37.037	37.037	59.2105	52.6316	76.1194	59.7015	58.6207	43.1034	51.3514	44.5946		'R'	'F'	'C'	'M1'	44.4444
	44.4444	33.3333	44.4444	51.8519	62.963	40.7407	33.3333	29.6296	73.6842	56.5789	67.1642	64.1791	36.2069	43.1034	37.8378	45.9459		'R'	'F'	'C'	'M1'	44.4444
	59.2593	51.8519	55.5556	29.6296	55.5556	37.037	55.5556	48.1481	65.7895	59.2105	65.6716	67.1642	56.8966	44.8276	45.9459	52.7027		'R'	'F'	'C'	'M1'	55.5556
	44.4444	33.3333	48.1481	51.8519	55.5556	44.4444	22.2222	29.6296	61.8421	51.3158	68.6567	59.7015	55.1724	39.6552	48.6486	48.6486		'R'	'F'	'C'	'M1'	66.6667
	62.963	29.6296	44.4444	37.037	59.2593	48.1481	29.6296	29.6296	55.2632	60.5263	68.6567	65.6716	55.1724	43.1034	45.9459	47.2973		'R'	'F'	'C'	'M1'	55.5556
	66.6667	55.5556	55.5556	40.7407	55.5556	48.1481	37.037	29.6296	60.5263	56.5789	58.209	55.2239	37.931	41.3793	48.6486	47.2973		'R'	'F'	'C'	'M1'	55.5556
	62.963	33.3333	59.2593	48.1481	51.8519	40.7407	33.3333	51.8519	78.9474	57.8947	58.209	62.6866	62.069	31.0345	39.1892	40.5405		'R'	'F'	'C'	'M1'	74.0741
	74.0741	33.3333	37.037	37.037	48.1481	37.037	48.1481	29.6296	55.2632	38.1579	67.1642	56.7164	50	41.3793	48.6486	44.5946		'R'	'F'	'C'	'M1'	48.1481
	55.5556	40.7407	81.4815	44.4444	55.5556	48.1481	70.3704	51.8519	72.3684	51.3158	56.7164	59.7015	53.4483	48.2759	48.6486	39.1892		'R'	'F'	'C'	'M1'	55.5556
	48.1481	51.8519	59.2593	37.037	44.4444	40.7407	40.7407	40.7407	71.0526	56.5789	76.1194	64.1791	60.3448	51.7241	47.2973	58.1081		'R'	'F'	'C'	'M1'	59.2593
	55.5556	29.6296	29.6296	44.4444	48.1481	51.8519	33.3333	25.9259	82.8947	57.8947	73.1343	65.6716	53.4483	60.3448	44.5946	51.3514		'R'	'F'	'C'	'M1'	62.963
	66.6667	37.037	55.5556	48.1481	59.2593	37.037	48.1481	59.2593	57.8947	61.8421	71.6418	68.6567	44.8276	39.6552	45.9459	45.9459		'R'	'F'	'C'	'M1'	51.8519
	70.3704	40.7407	55.5556	18.5185	48.1481	40.7407	40.7407	40.7407	73.6842	57.8947	62.6866	64.1791	34.4828	44.8276	43.2432	41.8919		'R'	'F'	'C'	'M1'	59.2593
	48.1481	51.8519	44.4444	33.3333	40.7407	51.8519	51.8519	33.3333	72.3684	56.5789	55.2239	55.2239	41.3793	34.4828	44.5946	45.9459		'R'	'F'	'C'	'M1'	37.037
	51.8519	37.037	66.6667	48.1481	62.963	37.037	44.4444	29.6296	61.8421	64.4737	73.1343	73.1343	43.1034	36.2069	52.7027	52.7027		'R'	'F'	'C'	'M1'	51.8519
	44.4444	37.037	40.7407	37.037	44.4444	62.963	37.037	25.9259	73.6842	53.9474	62.6866	65.6716	60.3448	46.5517	52.7027	48.6486		'R'	'F'	'C'	'M1'	74.0741
																		'R'	'F'	'C'	'M1'	40.7407
mean	54.9259	42.6296	50.7778	39.2963	50.8519	41.8889	44.2963	34.6296	68.0658	58.3421	65.9552	61.5224	50.2759	44.4655	46.4459	45.9054		'R'	'F'	'C'	'M1'	44.4444
std	9.75024	8.33169	10.7407	8.53542	7.91131	8.95992	10.0837	9.4518	7.74232	5.11562	5.19936	5.37757	7.39946	6.59974	5.76108	5.14474		'R'	'F'	'C'	'M1'	59.2593
																		'R'	'F'	'C'	'M1'	44.4444
																		'R'	'F'	'C'	'M1'	62.963
																		'R'	'F'	'C'	'M1'	66.6667
																		'R'	'F'	'C'	'M1'	62.963
																		'R'	'F'	'C'	'M1'	74.0741
																		'R'	'F'	'C'	'M1'	55.5556
																		'R'	'F'	'C'	'M1'	48.1481
																		'R'	'F'	'C'	'M1'	55.5556
																		'R'	'F'	'C'	'M1'	66.6667
																		'R'	'F'	'C'	'M1'	70.3704
																		'R'	'F'	'C'	'M1'	48.1481
																		'R'	'F'	'C'	'M1'	51.8519
																		'R'	'F'	'C'	'M1'	44.4444
																		'R'	'F'	'C'	'S1'	44.4444
																		'R'	'F'	'C'	'S1'	33.3333
																		'R'	'F'	'C'	'S1'	44.4444
																		'R'	'F'	'C'	'S1'	44.4444
																		'R'	'F'	'C'	'S1'	37.037
																		'R'	'F'	'C'	'S1'	37.037
																		'R'	'F'	'C'	'S1'	40.7407
																		'R'	'F'	'C'	'S1'	55.5556
																		'R'	'F'	'C'	'S1'	40.7407
																		'R'	'F'	'C'	'S1'	33.3333
																		'R'	'F'	'C'	'S1'	55.5556
																		'R'	'F'	'C'	'S1'	48.1481
																		'R'	'F'	'C'	'S1'	55.5556
																		'R'	'F'	'C'	'S1'	44.4444
																		'R'	'F'	'C'	'S1'	44.4444
																		'R'	'F'	'C'	'S1'	40.7407
																		'R'	'F'	'C'	'S1'	51.8519
																		'R'	'F'	'C'	'S1'	33.3333
																		'R'	'F'	'C'	'S1'	40.7407
																		'R'	'F'	'C'	'S1'	44.4444
																		'R'	'F'	'C'	'S1'	40.7407
																		'R'	'F'	'C'	'S1'	40.7407
																		'R'	'F'	'C'	'S1'	59.2593
																		'R'	'F'	'C'	'S1'	29.6296
																		'R'	'F'	'C'	'S1'	48.1481
																		'R'	'F'	'C'	'S1'	37.037
																		'R'	'F'	'C'	'S1'	55.5556
																		'R'	'F'	'C'	'S1'	22.2222
																		'R'	'F'	'C'	'S1'	48.1481
																		'R'	'F'	'C'	'S1'	40.7407
																		'R'	'F'	'C'	'S1'	44.4444
																		'R'	'F'	'C'	'S1'	48.1481
																		'R'	'F'	'C'	'S1'	44.4444
																		'R'	'F'	'C'	'S1'	44.4444
																		'R'	'F'	'C'	'S1'	44.4444
																		'R'	'F'	'C'	'S1'	40.7407
																		'R'	'F'	'C'	'S1'	40.7407
																		'R'	'F'	'C'	'S1'	48.1481
																		'R'	'F'	'C'	'S1'	40.7407
																		'R'	'F'	'C'	'S1'	33.3333
																		'R'	'F'	'C'	'S1'	44.4444
																		'R'	'F'	'C'	'S1'	59.2593
																		'R'	'F'	'C'	'S1'	51.8519
																		'R'	'F'	'C'	'S1'	44.4444
																		'R'	'F'	'C'	'S1'	37.037
																		'R'	'F'	'C'	'S1'	51.8519
																		'R'	'F'	'C'	'S1'	25.9259
																		'R'	'F'	'C'	'S1'	44.4444
																		'R'	'F'	'C'	'S1'	33.3333
																		'R'	'F'	'C'	'S1'	59.2593
																		'R'	'F'	'C'	'S1'	37.037
																		'R'	'F'	'C'	'S1'	29.6296
																		'R'	'F'	'C'	'S1'	44.4444
																		'R'	'F'	'C'	'S1'	25.9259
																		'R'	'F'	'C'	'S1'	25.9259
																		'R'	'F'	'C'	'S1'	48.1481
																		'R'	'F'	'C'	'S1'	37.037
																		'R'	'F'	'C'	'S1'	33.3333
																		'R'	'F'	'C'	'S1'	48.1481
																		'R'	'F'	'C'	'S1'	40.7407
																		'R'	'F'	'C'	'S1'	40.7407
																		'R'	'F'	'C'	'S1'	59.2593
																		'R'	'F'	'C'	'S1'	48.1481
																		'R'	'F'	'C'	'S1'	40.7407
																		'R'	'F'	'C'	'S1'	44.4444
																		'R'	'F'	'C'	'S1'	55.5556
																		'R'	'F'	'C'	'S1'	55.5556
																		'R'	'F'	'C'	'S1'	44.4444
																		'R'	'F'	'C'	'S1'	48.1481
																		'R'	'F'	'C'	'S1'	44.4444
																		'R'	'F'	'C'	'S1'	37.037
																		'R'	'F'	'C'	'S1'	48.1481
																		'R'	'F'	'C'	'S1'	33.3333
																		'R'	'F'	'C'	'S1'	55.5556
																		'R'	'F'	'C'	'S1'	44.4444
																		'R'	'F'	'C'	'S1'	37.037
																		'R'	'F'	'C'	'S1'	48.1481
																		'R'	'F'	'C'	'S1'	55.5556
																		'R'	'F'	'C'	'S1'	44.4444
																		'R'	'F'	'C'	'S1'	40.7407
																		'R'	'F'	'C'	'S1'	37.037
																		'R'	'F'	'C'	'S1'	40.7407
																		'R'	'F'	'C'	'S1'	40.7407
																		'R'	'F'	'C'	'S1'	40.7407
																		'R'	'F'	'C'	'S1'	37.037
																		'R'	'F'	'C'	'S1'	33.3333
																		'R'	'F'	'C'	'S1'	51.8519
																		'R'	'F'	'C'	'S1'	33.3333
																		'R'	'F'	'C'	'S1'	29.6296
																		'R'	'F'	'C'	'S1'	55.5556
																		'R'	'F'	'C'	'S1'	33.3333
																		'R'	'F'	'C'	'S1'	33.3333
																		'R'	'F'	'C'	'S1'	40.7407
																		'R'	'F'	'C'	'S1'	51.8519
																		'R'	'F'	'C'	'S1'	29.6296
																		'R'	'F'	'C'	'S1'	37.037
																		'R'	'F'	'C'	'S1'	40.7407
																		'R'	'F'	'C'	'S1'	51.8519
																		'R'	'F'	'C'	'S1'	37.037
																		'R'	'F'	'C'	'S1'	37.037
																		'R'	'F'	'NB'	'M1'	40.7407
																		'R'	'F'	'NB'	'M1'	59.2593
																		'R'	'F'	'NB'	'M1'	48.1481
																		'R'	'F'	'NB'	'M1'	55.5556
																		'R'	'F'	'NB'	'M1'	51.8519
																		'R'	'F'	'NB'	'M1'	59.2593
																		'R'	'F'	'NB'	'M1'	55.5556
																		'R'	'F'	'NB'	'M1'	40.7407
																		'R'	'F'	'NB'	'M1'	44.4444
																		'R'	'F'	'NB'	'M1'	62.963
																		'R'	'F'	'NB'	'M1'	37.037
																		'R'	'F'	'NB'	'M1'	51.8519
																		'R'	'F'	'NB'	'M1'	40.7407
																		'R'	'F'	'NB'	'M1'	55.5556
																		'R'	'F'	'NB'	'M1'	59.2593
																		'R'	'F'	'NB'	'M1'	55.5556
																		'R'	'F'	'NB'	'M1'	40.7407
																		'R'	'F'	'NB'	'M1'	51.8519
																		'R'	'F'	'NB'	'M1'	44.4444
																		'R'	'F'	'NB'	'M1'	51.8519
																		'R'	'F'	'NB'	'M1'	66.6667
																		'R'	'F'	'NB'	'M1'	40.7407
																		'R'	'F'	'NB'	'M1'	51.8519
																		'R'	'F'	'NB'	'M1'	37.037
																		'R'	'F'	'NB'	'M1'	55.5556
																		'R'	'F'	'NB'	'M1'	37.037
																		'R'	'F'	'NB'	'M1'	51.8519
																		'R'	'F'	'NB'	'M1'	59.2593
																		'R'	'F'	'NB'	'M1'	66.6667
																		'R'	'F'	'NB'	'M1'	51.8519
																		'R'	'F'	'NB'	'M1'	55.5556
																		'R'	'F'	'NB'	'M1'	59.2593
																		'R'	'F'	'NB'	'M1'	51.8519
																		'R'	'F'	'NB'	'M1'	37.037
																		'R'	'F'	'NB'	'M1'	37.037
																		'R'	'F'	'NB'	'M1'	40.7407
																		'R'	'F'	'NB'	'M1'	55.5556
																		'R'	'F'	'NB'	'M1'	55.5556
																		'R'	'F'	'NB'	'M1'	33.3333
																		'R'	'F'	'NB'	'M1'	37.037
																		'R'	'F'	'NB'	'M1'	59.2593
																		'R'	'F'	'NB'	'M1'	66.6667
																		'R'	'F'	'NB'	'M1'	44.4444
																		'R'	'F'	'NB'	'M1'	59.2593
																		'R'	'F'	'NB'	'M1'	40.7407
																		'R'	'F'	'NB'	'M1'	51.8519
																		'R'	'F'	'NB'	'M1'	48.1481
																		'R'	'F'	'NB'	'M1'	44.4444
																		'R'	'F'	'NB'	'M1'	59.2593
																		'R'	'F'	'NB'	'M1'	51.8519
																		'R'	'F'	'NB'	'M1'	62.963
																		'R'	'F'	'NB'	'M1'	48.1481
																		'R'	'F'	'NB'	'M1'	62.963
																		'R'	'F'	'NB'	'M1'	62.963
																		'R'	'F'	'NB'	'M1'	51.8519
																		'R'	'F'	'NB'	'M1'	40.7407
																		'R'	'F'	'NB'	'M1'	29.6296
																		'R'	'F'	'NB'	'M1'	66.6667
																		'R'	'F'	'NB'	'M1'	62.963
																		'R'	'F'	'NB'	'M1'	55.5556
																		'R'	'F'	'NB'	'M1'	44.4444
																		'R'	'F'	'NB'	'M1'	70.3704
																		'R'	'F'	'NB'	'M1'	51.8519
																		'R'	'F'	'NB'	'M1'	48.1481
																		'R'	'F'	'NB'	'M1'	22.2222
																		'R'	'F'	'NB'	'M1'	40.7407
																		'R'	'F'	'NB'	'M1'	48.1481
																		'R'	'F'	'NB'	'M1'	55.5556
																		'R'	'F'	'NB'	'M1'	66.6667
																		'R'	'F'	'NB'	'M1'	40.7407
																		'R'	'F'	'NB'	'M1'	51.8519
																		'R'	'F'	'NB'	'M1'	44.4444
																		'R'	'F'	'NB'	'M1'	55.5556
																		'R'	'F'	'NB'	'M1'	51.8519
																		'R'	'F'	'NB'	'M1'	40.7407
																		'R'	'F'	'NB'	'M1'	70.3704
																		'R'	'F'	'NB'	'M1'	40.7407
																		'R'	'F'	'NB'	'M1'	59.2593
																		'R'	'F'	'NB'	'M1'	62.963
																		'R'	'F'	'NB'	'M1'	55.5556
																		'R'	'F'	'NB'	'M1'	59.2593
																		'R'	'F'	'NB'	'M1'	48.1481
																		'R'	'F'	'NB'	'M1'	51.8519
																		'R'	'F'	'NB'	'M1'	37.037
																		'R'	'F'	'NB'	'M1'	22.2222
																		'R'	'F'	'NB'	'M1'	44.4444
																		'R'	'F'	'NB'	'M1'	55.5556
																		'R'	'F'	'NB'	'M1'	48.1481
																		'R'	'F'	'NB'	'M1'	44.4444
																		'R'	'F'	'NB'	'M1'	55.5556
																		'R'	'F'	'NB'	'M1'	59.2593
																		'R'	'F'	'NB'	'M1'	37.037
																		'R'	'F'	'NB'	'M1'	81.4815
																		'R'	'F'	'NB'	'M1'	59.2593
																		'R'	'F'	'NB'	'M1'	29.6296
																		'R'	'F'	'NB'	'M1'	55.5556
																		'R'	'F'	'NB'	'M1'	55.5556
																		'R'	'F'	'NB'	'M1'	44.4444
																		'R'	'F'	'NB'	'M1'	66.6667
																		'R'	'F'	'NB'	'M1'	40.7407
																		'R'	'F'	'NB'	'S1'	48.1481
																		'R'	'F'	'NB'	'S1'	44.4444
																		'R'	'F'	'NB'	'S1'	48.1481
																		'R'	'F'	'NB'	'S1'	48.1481
																		'R'	'F'	'NB'	'S1'	40.7407
																		'R'	'F'	'NB'	'S1'	33.3333
																		'R'	'F'	'NB'	'S1'	40.7407
																		'R'	'F'	'NB'	'S1'	59.2593
																		'R'	'F'	'NB'	'S1'	33.3333
																		'R'	'F'	'NB'	'S1'	29.6296
																		'R'	'F'	'NB'	'S1'	29.6296
																		'R'	'F'	'NB'	'S1'	33.3333
																		'R'	'F'	'NB'	'S1'	40.7407
																		'R'	'F'	'NB'	'S1'	37.037
																		'R'	'F'	'NB'	'S1'	55.5556
																		'R'	'F'	'NB'	'S1'	40.7407
																		'R'	'F'	'NB'	'S1'	40.7407
																		'R'	'F'	'NB'	'S1'	48.1481
																		'R'	'F'	'NB'	'S1'	33.3333
																		'R'	'F'	'NB'	'S1'	29.6296
																		'R'	'F'	'NB'	'S1'	40.7407
																		'R'	'F'	'NB'	'S1'	33.3333
																		'R'	'F'	'NB'	'S1'	40.7407
																		'R'	'F'	'NB'	'S1'	37.037
																		'R'	'F'	'NB'	'S1'	51.8519
																		'R'	'F'	'NB'	'S1'	37.037
																		'R'	'F'	'NB'	'S1'	37.037
																		'R'	'F'	'NB'	'S1'	37.037
																		'R'	'F'	'NB'	'S1'	25.9259
																		'R'	'F'	'NB'	'S1'	22.2222
																		'R'	'F'	'NB'	'S1'	37.037
																		'R'	'F'	'NB'	'S1'	40.7407
																		'R'	'F'	'NB'	'S1'	37.037
																		'R'	'F'	'NB'	'S1'	29.6296
																		'R'	'F'	'NB'	'S1'	37.037
																		'R'	'F'	'NB'	'S1'	48.1481
																		'R'	'F'	'NB'	'S1'	22.2222
																		'R'	'F'	'NB'	'S1'	29.6296
																		'R'	'F'	'NB'	'S1'	40.7407
																		'R'	'F'	'NB'	'S1'	40.7407
																		'R'	'F'	'NB'	'S1'	40.7407
																		'R'	'F'	'NB'	'S1'	48.1481
																		'R'	'F'	'NB'	'S1'	40.7407
																		'R'	'F'	'NB'	'S1'	40.7407
																		'R'	'F'	'NB'	'S1'	44.4444
																		'R'	'F'	'NB'	'S1'	40.7407
																		'R'	'F'	'NB'	'S1'	51.8519
																		'R'	'F'	'NB'	'S1'	44.4444
																		'R'	'F'	'NB'	'S1'	40.7407
																		'R'	'F'	'NB'	'S1'	25.9259
																		'R'	'F'	'NB'	'S1'	37.037
																		'R'	'F'	'NB'	'S1'	33.3333
																		'R'	'F'	'NB'	'S1'	40.7407
																		'R'	'F'	'NB'	'S1'	37.037
																		'R'	'F'	'NB'	'S1'	44.4444
																		'R'	'F'	'NB'	'S1'	44.4444
																		'R'	'F'	'NB'	'S1'	62.963
																		'R'	'F'	'NB'	'S1'	51.8519
																		'R'	'F'	'NB'	'S1'	44.4444
																		'R'	'F'	'NB'	'S1'	22.2222
																		'R'	'F'	'NB'	'S1'	33.3333
																		'R'	'F'	'NB'	'S1'	29.6296
																		'R'	'F'	'NB'	'S1'	40.7407
																		'R'	'F'	'NB'	'S1'	44.4444
																		'R'	'F'	'NB'	'S1'	40.7407
																		'R'	'F'	'NB'	'S1'	25.9259
																		'R'	'F'	'NB'	'S1'	29.6296
																		'R'	'F'	'NB'	'S1'	44.4444
																		'R'	'F'	'NB'	'S1'	29.6296
																		'R'	'F'	'NB'	'S1'	44.4444
																		'R'	'F'	'NB'	'S1'	51.8519
																		'R'	'F'	'NB'	'S1'	40.7407
																		'R'	'F'	'NB'	'S1'	40.7407
																		'R'	'F'	'NB'	'S1'	40.7407
																		'R'	'F'	'NB'	'S1'	48.1481
																		'R'	'F'	'NB'	'S1'	37.037
																		'R'	'F'	'NB'	'S1'	22.2222
																		'R'	'F'	'NB'	'S1'	40.7407
																		'R'	'F'	'NB'	'S1'	44.4444
																		'R'	'F'	'NB'	'S1'	25.9259
																		'R'	'F'	'NB'	'S1'	40.7407
																		'R'	'F'	'NB'	'S1'	25.9259
																		'R'	'F'	'NB'	'S1'	37.037
																		'R'	'F'	'NB'	'S1'	51.8519
																		'R'	'F'	'NB'	'S1'	33.3333
																		'R'	'F'	'NB'	'S1'	51.8519
																		'R'	'F'	'NB'	'S1'	29.6296
																		'R'	'F'	'NB'	'S1'	51.8519
																		'R'	'F'	'NB'	'S1'	37.037
																		'R'	'F'	'NB'	'S1'	40.7407
																		'R'	'F'	'NB'	'S1'	48.1481
																		'R'	'F'	'NB'	'S1'	37.037
																		'R'	'F'	'NB'	'S1'	44.4444
																		'R'	'F'	'NB'	'S1'	37.037
																		'R'	'F'	'NB'	'S1'	44.4444
																		'R'	'F'	'NB'	'S1'	48.1481
																		'R'	'F'	'NB'	'S1'	18.5185
																		'R'	'F'	'NB'	'S1'	33.3333
																		'R'	'F'	'NB'	'S1'	48.1481
																		'R'	'F'	'NB'	'S1'	37.037
																		'Y'	'F'	'C'	'M1'	40.7407
																		'Y'	'F'	'C'	'M1'	59.2593
																		'Y'	'F'	'C'	'M1'	62.963
																		'Y'	'F'	'C'	'M1'	40.7407
																		'Y'	'F'	'C'	'M1'	55.5556
																		'Y'	'F'	'C'	'M1'	48.1481
																		'Y'	'F'	'C'	'M1'	55.5556
																		'Y'	'F'	'C'	'M1'	62.963
																		'Y'	'F'	'C'	'M1'	33.3333
																		'Y'	'F'	'C'	'M1'	48.1481
																		'Y'	'F'	'C'	'M1'	48.1481
																		'Y'	'F'	'C'	'M1'	44.4444
																		'Y'	'F'	'C'	'M1'	51.8519
																		'Y'	'F'	'C'	'M1'	55.5556
																		'Y'	'F'	'C'	'M1'	44.4444
																		'Y'	'F'	'C'	'M1'	62.963
																		'Y'	'F'	'C'	'M1'	55.5556
																		'Y'	'F'	'C'	'M1'	55.5556
																		'Y'	'F'	'C'	'M1'	55.5556
																		'Y'	'F'	'C'	'M1'	48.1481
																		'Y'	'F'	'C'	'M1'	55.5556
																		'Y'	'F'	'C'	'M1'	62.963
																		'Y'	'F'	'C'	'M1'	51.8519
																		'Y'	'F'	'C'	'M1'	48.1481
																		'Y'	'F'	'C'	'M1'	51.8519
																		'Y'	'F'	'C'	'M1'	51.8519
																		'Y'	'F'	'C'	'M1'	40.7407
																		'Y'	'F'	'C'	'M1'	51.8519
																		'Y'	'F'	'C'	'M1'	55.5556
																		'Y'	'F'	'C'	'M1'	59.2593
																		'Y'	'F'	'C'	'M1'	37.037
																		'Y'	'F'	'C'	'M1'	48.1481
																		'Y'	'F'	'C'	'M1'	40.7407
																		'Y'	'F'	'C'	'M1'	48.1481
																		'Y'	'F'	'C'	'M1'	37.037
																		'Y'	'F'	'C'	'M1'	48.1481
																		'Y'	'F'	'C'	'M1'	51.8519
																		'Y'	'F'	'C'	'M1'	51.8519
																		'Y'	'F'	'C'	'M1'	51.8519
																		'Y'	'F'	'C'	'M1'	59.2593
																		'Y'	'F'	'C'	'M1'	59.2593
																		'Y'	'F'	'C'	'M1'	40.7407
																		'Y'	'F'	'C'	'M1'	55.5556
																		'Y'	'F'	'C'	'M1'	55.5556
																		'Y'	'F'	'C'	'M1'	37.037
																		'Y'	'F'	'C'	'M1'	66.6667
																		'Y'	'F'	'C'	'M1'	40.7407
																		'Y'	'F'	'C'	'M1'	55.5556
																		'Y'	'F'	'C'	'M1'	44.4444
																		'Y'	'F'	'C'	'M1'	40.7407
																		'Y'	'F'	'C'	'M1'	48.1481
																		'Y'	'F'	'C'	'M1'	44.4444
																		'Y'	'F'	'C'	'M1'	59.2593
																		'Y'	'F'	'C'	'M1'	44.4444
																		'Y'	'F'	'C'	'M1'	37.037
																		'Y'	'F'	'C'	'M1'	48.1481
																		'Y'	'F'	'C'	'M1'	51.8519
																		'Y'	'F'	'C'	'M1'	62.963
																		'Y'	'F'	'C'	'M1'	55.5556
																		'Y'	'F'	'C'	'M1'	44.4444
																		'Y'	'F'	'C'	'M1'	48.1481
																		'Y'	'F'	'C'	'M1'	59.2593
																		'Y'	'F'	'C'	'M1'	44.4444
																		'Y'	'F'	'C'	'M1'	48.1481
																		'Y'	'F'	'C'	'M1'	40.7407
																		'Y'	'F'	'C'	'M1'	48.1481
																		'Y'	'F'	'C'	'M1'	44.4444
																		'Y'	'F'	'C'	'M1'	44.4444
																		'Y'	'F'	'C'	'M1'	51.8519
																		'Y'	'F'	'C'	'M1'	40.7407
																		'Y'	'F'	'C'	'M1'	44.4444
																		'Y'	'F'	'C'	'M1'	55.5556
																		'Y'	'F'	'C'	'M1'	51.8519
																		'Y'	'F'	'C'	'M1'	62.963
																		'Y'	'F'	'C'	'M1'	62.963
																		'Y'	'F'	'C'	'M1'	40.7407
																		'Y'	'F'	'C'	'M1'	62.963
																		'Y'	'F'	'C'	'M1'	55.5556
																		'Y'	'F'	'C'	'M1'	48.1481
																		'Y'	'F'	'C'	'M1'	48.1481
																		'Y'	'F'	'C'	'M1'	51.8519
																		'Y'	'F'	'C'	'M1'	70.3704
																		'Y'	'F'	'C'	'M1'	44.4444
																		'Y'	'F'	'C'	'M1'	37.037
																		'Y'	'F'	'C'	'M1'	59.2593
																		'Y'	'F'	'C'	'M1'	62.963
																		'Y'	'F'	'C'	'M1'	55.5556
																		'Y'	'F'	'C'	'M1'	55.5556
																		'Y'	'F'	'C'	'M1'	59.2593
																		'Y'	'F'	'C'	'M1'	55.5556
																		'Y'	'F'	'C'	'M1'	51.8519
																		'Y'	'F'	'C'	'M1'	48.1481
																		'Y'	'F'	'C'	'M1'	55.5556
																		'Y'	'F'	'C'	'M1'	44.4444
																		'Y'	'F'	'C'	'M1'	48.1481
																		'Y'	'F'	'C'	'M1'	59.2593
																		'Y'	'F'	'C'	'M1'	48.1481
																		'Y'	'F'	'C'	'M1'	40.7407
																		'Y'	'F'	'C'	'M1'	62.963
																		'Y'	'F'	'C'	'M1'	44.4444
																		'Y'	'F'	'C'	'S1'	59.2593
																		'Y'	'F'	'C'	'S1'	29.6296
																		'Y'	'F'	'C'	'S1'	37.037
																		'Y'	'F'	'C'	'S1'	33.3333
																		'Y'	'F'	'C'	'S1'	40.7407
																		'Y'	'F'	'C'	'S1'	37.037
																		'Y'	'F'	'C'	'S1'	44.4444
																		'Y'	'F'	'C'	'S1'	51.8519
																		'Y'	'F'	'C'	'S1'	44.4444
																		'Y'	'F'	'C'	'S1'	51.8519
																		'Y'	'F'	'C'	'S1'	33.3333
																		'Y'	'F'	'C'	'S1'	40.7407
																		'Y'	'F'	'C'	'S1'	40.7407
																		'Y'	'F'	'C'	'S1'	40.7407
																		'Y'	'F'	'C'	'S1'	44.4444
																		'Y'	'F'	'C'	'S1'	48.1481
																		'Y'	'F'	'C'	'S1'	37.037
																		'Y'	'F'	'C'	'S1'	44.4444
																		'Y'	'F'	'C'	'S1'	29.6296
																		'Y'	'F'	'C'	'S1'	33.3333
																		'Y'	'F'	'C'	'S1'	44.4444
																		'Y'	'F'	'C'	'S1'	29.6296
																		'Y'	'F'	'C'	'S1'	37.037
																		'Y'	'F'	'C'	'S1'	44.4444
																		'Y'	'F'	'C'	'S1'	55.5556
																		'Y'	'F'	'C'	'S1'	33.3333
																		'Y'	'F'	'C'	'S1'	44.4444
																		'Y'	'F'	'C'	'S1'	48.1481
																		'Y'	'F'	'C'	'S1'	51.8519
																		'Y'	'F'	'C'	'S1'	55.5556
																		'Y'	'F'	'C'	'S1'	37.037
																		'Y'	'F'	'C'	'S1'	37.037
																		'Y'	'F'	'C'	'S1'	51.8519
																		'Y'	'F'	'C'	'S1'	48.1481
																		'Y'	'F'	'C'	'S1'	29.6296
																		'Y'	'F'	'C'	'S1'	37.037
																		'Y'	'F'	'C'	'S1'	29.6296
																		'Y'	'F'	'C'	'S1'	37.037
																		'Y'	'F'	'C'	'S1'	44.4444
																		'Y'	'F'	'C'	'S1'	33.3333
																		'Y'	'F'	'C'	'S1'	37.037
																		'Y'	'F'	'C'	'S1'	48.1481
																		'Y'	'F'	'C'	'S1'	37.037
																		'Y'	'F'	'C'	'S1'	51.8519
																		'Y'	'F'	'C'	'S1'	29.6296
																		'Y'	'F'	'C'	'S1'	25.9259
																		'Y'	'F'	'C'	'S1'	37.037
																		'Y'	'F'	'C'	'S1'	29.6296
																		'Y'	'F'	'C'	'S1'	25.9259
																		'Y'	'F'	'C'	'S1'	44.4444
																		'Y'	'F'	'C'	'S1'	48.1481
																		'Y'	'F'	'C'	'S1'	55.5556
																		'Y'	'F'	'C'	'S1'	48.1481
																		'Y'	'F'	'C'	'S1'	51.8519
																		'Y'	'F'	'C'	'S1'	59.2593
																		'Y'	'F'	'C'	'S1'	40.7407
																		'Y'	'F'	'C'	'S1'	29.6296
																		'Y'	'F'	'C'	'S1'	48.1481
																		'Y'	'F'	'C'	'S1'	40.7407
																		'Y'	'F'	'C'	'S1'	40.7407
																		'Y'	'F'	'C'	'S1'	51.8519
																		'Y'	'F'	'C'	'S1'	40.7407
																		'Y'	'F'	'C'	'S1'	29.6296
																		'Y'	'F'	'C'	'S1'	44.4444
																		'Y'	'F'	'C'	'S1'	18.5185
																		'Y'	'F'	'C'	'S1'	25.9259
																		'Y'	'F'	'C'	'S1'	33.3333
																		'Y'	'F'	'C'	'S1'	55.5556
																		'Y'	'F'	'C'	'S1'	37.037
																		'Y'	'F'	'C'	'S1'	51.8519
																		'Y'	'F'	'C'	'S1'	40.7407
																		'Y'	'F'	'C'	'S1'	48.1481
																		'Y'	'F'	'C'	'S1'	48.1481
																		'Y'	'F'	'C'	'S1'	59.2593
																		'Y'	'F'	'C'	'S1'	48.1481
																		'Y'	'F'	'C'	'S1'	40.7407
																		'Y'	'F'	'C'	'S1'	40.7407
																		'Y'	'F'	'C'	'S1'	37.037
																		'Y'	'F'	'C'	'S1'	29.6296
																		'Y'	'F'	'C'	'S1'	33.3333
																		'Y'	'F'	'C'	'S1'	40.7407
																		'Y'	'F'	'C'	'S1'	62.963
																		'Y'	'F'	'C'	'S1'	44.4444
																		'Y'	'F'	'C'	'S1'	44.4444
																		'Y'	'F'	'C'	'S1'	33.3333
																		'Y'	'F'	'C'	'S1'	40.7407
																		'Y'	'F'	'C'	'S1'	37.037
																		'Y'	'F'	'C'	'S1'	44.4444
																		'Y'	'F'	'C'	'S1'	48.1481
																		'Y'	'F'	'C'	'S1'	48.1481
																		'Y'	'F'	'C'	'S1'	40.7407
																		'Y'	'F'	'C'	'S1'	37.037
																		'Y'	'F'	'C'	'S1'	48.1481
																		'Y'	'F'	'C'	'S1'	40.7407
																		'Y'	'F'	'C'	'S1'	51.8519
																		'Y'	'F'	'C'	'S1'	37.037
																		'Y'	'F'	'C'	'S1'	40.7407
																		'Y'	'F'	'C'	'S1'	51.8519
																		'Y'	'F'	'C'	'S1'	37.037
																		'Y'	'F'	'C'	'S1'	62.963
																		'Y'	'F'	'NB'	'M1'	33.3333
																		'Y'	'F'	'NB'	'M1'	55.5556
																		'Y'	'F'	'NB'	'M1'	33.3333
																		'Y'	'F'	'NB'	'M1'	37.037
																		'Y'	'F'	'NB'	'M1'	37.037
																		'Y'	'F'	'NB'	'M1'	29.6296
																		'Y'	'F'	'NB'	'M1'	51.8519
																		'Y'	'F'	'NB'	'M1'	44.4444
																		'Y'	'F'	'NB'	'M1'	44.4444
																		'Y'	'F'	'NB'	'M1'	44.4444
																		'Y'	'F'	'NB'	'M1'	37.037
																		'Y'	'F'	'NB'	'M1'	44.4444
																		'Y'	'F'	'NB'	'M1'	44.4444
																		'Y'	'F'	'NB'	'M1'	48.1481
																		'Y'	'F'	'NB'	'M1'	44.4444
																		'Y'	'F'	'NB'	'M1'	70.3704
																		'Y'	'F'	'NB'	'M1'	51.8519
																		'Y'	'F'	'NB'	'M1'	66.6667
																		'Y'	'F'	'NB'	'M1'	37.037
																		'Y'	'F'	'NB'	'M1'	44.4444
																		'Y'	'F'	'NB'	'M1'	37.037
																		'Y'	'F'	'NB'	'M1'	40.7407
																		'Y'	'F'	'NB'	'M1'	37.037
																		'Y'	'F'	'NB'	'M1'	37.037
																		'Y'	'F'	'NB'	'M1'	37.037
																		'Y'	'F'	'NB'	'M1'	22.2222
																		'Y'	'F'	'NB'	'M1'	33.3333
																		'Y'	'F'	'NB'	'M1'	44.4444
																		'Y'	'F'	'NB'	'M1'	44.4444
																		'Y'	'F'	'NB'	'M1'	44.4444
																		'Y'	'F'	'NB'	'M1'	48.1481
																		'Y'	'F'	'NB'	'M1'	59.2593
																		'Y'	'F'	'NB'	'M1'	33.3333
																		'Y'	'F'	'NB'	'M1'	29.6296
																		'Y'	'F'	'NB'	'M1'	55.5556
																		'Y'	'F'	'NB'	'M1'	40.7407
																		'Y'	'F'	'NB'	'M1'	37.037
																		'Y'	'F'	'NB'	'M1'	22.2222
																		'Y'	'F'	'NB'	'M1'	48.1481
																		'Y'	'F'	'NB'	'M1'	48.1481
																		'Y'	'F'	'NB'	'M1'	51.8519
																		'Y'	'F'	'NB'	'M1'	51.8519
																		'Y'	'F'	'NB'	'M1'	44.4444
																		'Y'	'F'	'NB'	'M1'	48.1481
																		'Y'	'F'	'NB'	'M1'	62.963
																		'Y'	'F'	'NB'	'M1'	44.4444
																		'Y'	'F'	'NB'	'M1'	44.4444
																		'Y'	'F'	'NB'	'M1'	62.963
																		'Y'	'F'	'NB'	'M1'	48.1481
																		'Y'	'F'	'NB'	'M1'	55.5556
																		'Y'	'F'	'NB'	'M1'	62.963
																		'Y'	'F'	'NB'	'M1'	29.6296
																		'Y'	'F'	'NB'	'M1'	33.3333
																		'Y'	'F'	'NB'	'M1'	51.8519
																		'Y'	'F'	'NB'	'M1'	33.3333
																		'Y'	'F'	'NB'	'M1'	37.037
																		'Y'	'F'	'NB'	'M1'	48.1481
																		'Y'	'F'	'NB'	'M1'	40.7407
																		'Y'	'F'	'NB'	'M1'	51.8519
																		'Y'	'F'	'NB'	'M1'	44.4444
																		'Y'	'F'	'NB'	'M1'	33.3333
																		'Y'	'F'	'NB'	'M1'	48.1481
																		'Y'	'F'	'NB'	'M1'	44.4444
																		'Y'	'F'	'NB'	'M1'	44.4444
																		'Y'	'F'	'NB'	'M1'	44.4444
																		'Y'	'F'	'NB'	'M1'	62.963
																		'Y'	'F'	'NB'	'M1'	40.7407
																		'Y'	'F'	'NB'	'M1'	37.037
																		'Y'	'F'	'NB'	'M1'	48.1481
																		'Y'	'F'	'NB'	'M1'	59.2593
																		'Y'	'F'	'NB'	'M1'	33.3333
																		'Y'	'F'	'NB'	'M1'	44.4444
																		'Y'	'F'	'NB'	'M1'	44.4444
																		'Y'	'F'	'NB'	'M1'	40.7407
																		'Y'	'F'	'NB'	'M1'	48.1481
																		'Y'	'F'	'NB'	'M1'	62.963
																		'Y'	'F'	'NB'	'M1'	55.5556
																		'Y'	'F'	'NB'	'M1'	48.1481
																		'Y'	'F'	'NB'	'M1'	37.037
																		'Y'	'F'	'NB'	'M1'	55.5556
																		'Y'	'F'	'NB'	'M1'	40.7407
																		'Y'	'F'	'NB'	'M1'	55.5556
																		'Y'	'F'	'NB'	'M1'	44.4444
																		'Y'	'F'	'NB'	'M1'	44.4444
																		'Y'	'F'	'NB'	'M1'	37.037
																		'Y'	'F'	'NB'	'M1'	33.3333
																		'Y'	'F'	'NB'	'M1'	55.5556
																		'Y'	'F'	'NB'	'M1'	22.2222
																		'Y'	'F'	'NB'	'M1'	29.6296
																		'Y'	'F'	'NB'	'M1'	37.037
																		'Y'	'F'	'NB'	'M1'	33.3333
																		'Y'	'F'	'NB'	'M1'	48.1481
																		'Y'	'F'	'NB'	'M1'	70.3704
																		'Y'	'F'	'NB'	'M1'	40.7407
																		'Y'	'F'	'NB'	'M1'	33.3333
																		'Y'	'F'	'NB'	'M1'	48.1481
																		'Y'	'F'	'NB'	'M1'	40.7407
																		'Y'	'F'	'NB'	'M1'	51.8519
																		'Y'	'F'	'NB'	'M1'	44.4444
																		'Y'	'F'	'NB'	'M1'	37.037
																		'Y'	'F'	'NB'	'S1'	33.3333
																		'Y'	'F'	'NB'	'S1'	25.9259
																		'Y'	'F'	'NB'	'S1'	29.6296
																		'Y'	'F'	'NB'	'S1'	14.8148
																		'Y'	'F'	'NB'	'S1'	37.037
																		'Y'	'F'	'NB'	'S1'	48.1481
																		'Y'	'F'	'NB'	'S1'	18.5185
																		'Y'	'F'	'NB'	'S1'	25.9259
																		'Y'	'F'	'NB'	'S1'	51.8519
																		'Y'	'F'	'NB'	'S1'	51.8519
																		'Y'	'F'	'NB'	'S1'	37.037
																		'Y'	'F'	'NB'	'S1'	59.2593
																		'Y'	'F'	'NB'	'S1'	51.8519
																		'Y'	'F'	'NB'	'S1'	44.4444
																		'Y'	'F'	'NB'	'S1'	40.7407
																		'Y'	'F'	'NB'	'S1'	44.4444
																		'Y'	'F'	'NB'	'S1'	22.2222
																		'Y'	'F'	'NB'	'S1'	29.6296
																		'Y'	'F'	'NB'	'S1'	33.3333
																		'Y'	'F'	'NB'	'S1'	25.9259
																		'Y'	'F'	'NB'	'S1'	18.5185
																		'Y'	'F'	'NB'	'S1'	44.4444
																		'Y'	'F'	'NB'	'S1'	29.6296
																		'Y'	'F'	'NB'	'S1'	29.6296
																		'Y'	'F'	'NB'	'S1'	37.037
																		'Y'	'F'	'NB'	'S1'	44.4444
																		'Y'	'F'	'NB'	'S1'	33.3333
																		'Y'	'F'	'NB'	'S1'	40.7407
																		'Y'	'F'	'NB'	'S1'	33.3333
																		'Y'	'F'	'NB'	'S1'	33.3333
																		'Y'	'F'	'NB'	'S1'	29.6296
																		'Y'	'F'	'NB'	'S1'	40.7407
																		'Y'	'F'	'NB'	'S1'	25.9259
																		'Y'	'F'	'NB'	'S1'	33.3333
																		'Y'	'F'	'NB'	'S1'	37.037
																		'Y'	'F'	'NB'	'S1'	33.3333
																		'Y'	'F'	'NB'	'S1'	25.9259
																		'Y'	'F'	'NB'	'S1'	29.6296
																		'Y'	'F'	'NB'	'S1'	44.4444
																		'Y'	'F'	'NB'	'S1'	25.9259
																		'Y'	'F'	'NB'	'S1'	33.3333
																		'Y'	'F'	'NB'	'S1'	40.7407
																		'Y'	'F'	'NB'	'S1'	33.3333
																		'Y'	'F'	'NB'	'S1'	44.4444
																		'Y'	'F'	'NB'	'S1'	48.1481
																		'Y'	'F'	'NB'	'S1'	44.4444
																		'Y'	'F'	'NB'	'S1'	33.3333
																		'Y'	'F'	'NB'	'S1'	29.6296
																		'Y'	'F'	'NB'	'S1'	25.9259
																		'Y'	'F'	'NB'	'S1'	29.6296
																		'Y'	'F'	'NB'	'S1'	33.3333
																		'Y'	'F'	'NB'	'S1'	37.037
																		'Y'	'F'	'NB'	'S1'	37.037
																		'Y'	'F'	'NB'	'S1'	25.9259
																		'Y'	'F'	'NB'	'S1'	25.9259
																		'Y'	'F'	'NB'	'S1'	37.037
																		'Y'	'F'	'NB'	'S1'	48.1481
																		'Y'	'F'	'NB'	'S1'	25.9259
																		'Y'	'F'	'NB'	'S1'	33.3333
																		'Y'	'F'	'NB'	'S1'	33.3333
																		'Y'	'F'	'NB'	'S1'	22.2222
																		'Y'	'F'	'NB'	'S1'	25.9259
																		'Y'	'F'	'NB'	'S1'	33.3333
																		'Y'	'F'	'NB'	'S1'	25.9259
																		'Y'	'F'	'NB'	'S1'	40.7407
																		'Y'	'F'	'NB'	'S1'	25.9259
																		'Y'	'F'	'NB'	'S1'	40.7407
																		'Y'	'F'	'NB'	'S1'	11.1111
																		'Y'	'F'	'NB'	'S1'	33.3333
																		'Y'	'F'	'NB'	'S1'	44.4444
																		'Y'	'F'	'NB'	'S1'	40.7407
																		'Y'	'F'	'NB'	'S1'	29.6296
																		'Y'	'F'	'NB'	'S1'	44.4444
																		'Y'	'F'	'NB'	'S1'	29.6296
																		'Y'	'F'	'NB'	'S1'	25.9259
																		'Y'	'F'	'NB'	'S1'	51.8519
																		'Y'	'F'	'NB'	'S1'	25.9259
																		'Y'	'F'	'NB'	'S1'	44.4444
																		'Y'	'F'	'NB'	'S1'	25.9259
																		'Y'	'F'	'NB'	'S1'	37.037
																		'Y'	'F'	'NB'	'S1'	22.2222
																		'Y'	'F'	'NB'	'S1'	33.3333
																		'Y'	'F'	'NB'	'S1'	29.6296
																		'Y'	'F'	'NB'	'S1'	29.6296
																		'Y'	'F'	'NB'	'S1'	37.037
																		'Y'	'F'	'NB'	'S1'	29.6296
																		'Y'	'F'	'NB'	'S1'	48.1481
																		'Y'	'F'	'NB'	'S1'	29.6296
																		'Y'	'F'	'NB'	'S1'	29.6296
																		'Y'	'F'	'NB'	'S1'	29.6296
																		'Y'	'F'	'NB'	'S1'	51.8519
																		'Y'	'F'	'NB'	'S1'	29.6296
																		'Y'	'F'	'NB'	'S1'	51.8519
																		'Y'	'F'	'NB'	'S1'	40.7407
																		'Y'	'F'	'NB'	'S1'	25.9259
																		'Y'	'F'	'NB'	'S1'	59.2593
																		'Y'	'F'	'NB'	'S1'	40.7407
																		'Y'	'F'	'NB'	'S1'	33.3333
																		'Y'	'F'	'NB'	'S1'	29.6296
																		'Y'	'F'	'NB'	'S1'	25.9259
																		'R'	'D'	'C'	'M1'	59.2105
																		'R'	'D'	'C'	'M1'	72.3684
																		'R'	'D'	'C'	'M1'	61.8421
																		'R'	'D'	'C'	'M1'	61.8421
																		'R'	'D'	'C'	'M1'	76.3158
																		'R'	'D'	'C'	'M1'	64.4737
																		'R'	'D'	'C'	'M1'	75
																		'R'	'D'	'C'	'M1'	77.6316
																		'R'	'D'	'C'	'M1'	61.8421
																		'R'	'D'	'C'	'M1'	59.2105
																		'R'	'D'	'C'	'M1'	82.8947
																		'R'	'D'	'C'	'M1'	73.6842
																		'R'	'D'	'C'	'M1'	82.8947
																		'R'	'D'	'C'	'M1'	73.6842
																		'R'	'D'	'C'	'M1'	76.3158
																		'R'	'D'	'C'	'M1'	72.3684
																		'R'	'D'	'C'	'M1'	78.9474
																		'R'	'D'	'C'	'M1'	64.4737
																		'R'	'D'	'C'	'M1'	65.7895
																		'R'	'D'	'C'	'M1'	59.2105
																		'R'	'D'	'C'	'M1'	53.9474
																		'R'	'D'	'C'	'M1'	65.7895
																		'R'	'D'	'C'	'M1'	77.6316
																		'R'	'D'	'C'	'M1'	71.0526
																		'R'	'D'	'C'	'M1'	61.8421
																		'R'	'D'	'C'	'M1'	73.6842
																		'R'	'D'	'C'	'M1'	60.5263
																		'R'	'D'	'C'	'M1'	65.7895
																		'R'	'D'	'C'	'M1'	69.7368
																		'R'	'D'	'C'	'M1'	67.1053
																		'R'	'D'	'C'	'M1'	59.2105
																		'R'	'D'	'C'	'M1'	76.3158
																		'R'	'D'	'C'	'M1'	51.3158
																		'R'	'D'	'C'	'M1'	65.7895
																		'R'	'D'	'C'	'M1'	53.9474
																		'R'	'D'	'C'	'M1'	68.4211
																		'R'	'D'	'C'	'M1'	51.3158
																		'R'	'D'	'C'	'M1'	63.1579
																		'R'	'D'	'C'	'M1'	77.6316
																		'R'	'D'	'C'	'M1'	64.4737
																		'R'	'D'	'C'	'M1'	63.1579
																		'R'	'D'	'C'	'M1'	67.1053
																		'R'	'D'	'C'	'M1'	75
																		'R'	'D'	'C'	'M1'	72.3684
																		'R'	'D'	'C'	'M1'	67.1053
																		'R'	'D'	'C'	'M1'	77.6316
																		'R'	'D'	'C'	'M1'	76.3158
																		'R'	'D'	'C'	'M1'	63.1579
																		'R'	'D'	'C'	'M1'	73.6842
																		'R'	'D'	'C'	'M1'	80.2632
																		'R'	'D'	'C'	'M1'	59.2105
																		'R'	'D'	'C'	'M1'	73.6842
																		'R'	'D'	'C'	'M1'	71.0526
																		'R'	'D'	'C'	'M1'	67.1053
																		'R'	'D'	'C'	'M1'	73.6842
																		'R'	'D'	'C'	'M1'	65.7895
																		'R'	'D'	'C'	'M1'	64.4737
																		'R'	'D'	'C'	'M1'	75
																		'R'	'D'	'C'	'M1'	69.7368
																		'R'	'D'	'C'	'M1'	67.1053
																		'R'	'D'	'C'	'M1'	63.1579
																		'R'	'D'	'C'	'M1'	73.6842
																		'R'	'D'	'C'	'M1'	60.5263
																		'R'	'D'	'C'	'M1'	81.5789
																		'R'	'D'	'C'	'M1'	67.1053
																		'R'	'D'	'C'	'M1'	82.8947
																		'R'	'D'	'C'	'M1'	73.6842
																		'R'	'D'	'C'	'M1'	72.3684
																		'R'	'D'	'C'	'M1'	65.7895
																		'R'	'D'	'C'	'M1'	52.6316
																		'R'	'D'	'C'	'M1'	69.7368
																		'R'	'D'	'C'	'M1'	78.9474
																		'R'	'D'	'C'	'M1'	69.7368
																		'R'	'D'	'C'	'M1'	60.5263
																		'R'	'D'	'C'	'M1'	67.1053
																		'R'	'D'	'C'	'M1'	60.5263
																		'R'	'D'	'C'	'M1'	64.4737
																		'R'	'D'	'C'	'M1'	72.3684
																		'R'	'D'	'C'	'M1'	61.8421
																		'R'	'D'	'C'	'M1'	75
																		'R'	'D'	'C'	'M1'	60.5263
																		'R'	'D'	'C'	'M1'	69.7368
																		'R'	'D'	'C'	'M1'	67.1053
																		'R'	'D'	'C'	'M1'	57.8947
																		'R'	'D'	'C'	'M1'	59.2105
																		'R'	'D'	'C'	'M1'	73.6842
																		'R'	'D'	'C'	'M1'	65.7895
																		'R'	'D'	'C'	'M1'	61.8421
																		'R'	'D'	'C'	'M1'	55.2632
																		'R'	'D'	'C'	'M1'	60.5263
																		'R'	'D'	'C'	'M1'	78.9474
																		'R'	'D'	'C'	'M1'	55.2632
																		'R'	'D'	'C'	'M1'	72.3684
																		'R'	'D'	'C'	'M1'	71.0526
																		'R'	'D'	'C'	'M1'	82.8947
																		'R'	'D'	'C'	'M1'	57.8947
																		'R'	'D'	'C'	'M1'	73.6842
																		'R'	'D'	'C'	'M1'	72.3684
																		'R'	'D'	'C'	'M1'	61.8421
																		'R'	'D'	'C'	'M1'	73.6842
																		'R'	'D'	'C'	'S1'	55.2632
																		'R'	'D'	'C'	'S1'	57.8947
																		'R'	'D'	'C'	'S1'	60.5263
																		'R'	'D'	'C'	'S1'	63.1579
																		'R'	'D'	'C'	'S1'	60.5263
																		'R'	'D'	'C'	'S1'	51.3158
																		'R'	'D'	'C'	'S1'	51.3158
																		'R'	'D'	'C'	'S1'	63.1579
																		'R'	'D'	'C'	'S1'	55.2632
																		'R'	'D'	'C'	'S1'	51.3158
																		'R'	'D'	'C'	'S1'	63.1579
																		'R'	'D'	'C'	'S1'	61.8421
																		'R'	'D'	'C'	'S1'	63.1579
																		'R'	'D'	'C'	'S1'	61.8421
																		'R'	'D'	'C'	'S1'	60.5263
																		'R'	'D'	'C'	'S1'	69.7368
																		'R'	'D'	'C'	'S1'	60.5263
																		'R'	'D'	'C'	'S1'	64.4737
																		'R'	'D'	'C'	'S1'	65.7895
																		'R'	'D'	'C'	'S1'	55.2632
																		'R'	'D'	'C'	'S1'	55.2632
																		'R'	'D'	'C'	'S1'	65.7895
																		'R'	'D'	'C'	'S1'	63.1579
																		'R'	'D'	'C'	'S1'	57.8947
																		'R'	'D'	'C'	'S1'	61.8421
																		'R'	'D'	'C'	'S1'	57.8947
																		'R'	'D'	'C'	'S1'	50
																		'R'	'D'	'C'	'S1'	52.6316
																		'R'	'D'	'C'	'S1'	55.2632
																		'R'	'D'	'C'	'S1'	61.8421
																		'R'	'D'	'C'	'S1'	65.7895
																		'R'	'D'	'C'	'S1'	59.2105
																		'R'	'D'	'C'	'S1'	56.5789
																		'R'	'D'	'C'	'S1'	61.8421
																		'R'	'D'	'C'	'S1'	53.9474
																		'R'	'D'	'C'	'S1'	61.8421
																		'R'	'D'	'C'	'S1'	51.3158
																		'R'	'D'	'C'	'S1'	61.8421
																		'R'	'D'	'C'	'S1'	56.5789
																		'R'	'D'	'C'	'S1'	48.6842
																		'R'	'D'	'C'	'S1'	56.5789
																		'R'	'D'	'C'	'S1'	52.6316
																		'R'	'D'	'C'	'S1'	59.2105
																		'R'	'D'	'C'	'S1'	57.8947
																		'R'	'D'	'C'	'S1'	61.8421
																		'R'	'D'	'C'	'S1'	68.4211
																		'R'	'D'	'C'	'S1'	63.1579
																		'R'	'D'	'C'	'S1'	57.8947
																		'R'	'D'	'C'	'S1'	61.8421
																		'R'	'D'	'C'	'S1'	56.5789
																		'R'	'D'	'C'	'S1'	61.8421
																		'R'	'D'	'C'	'S1'	55.2632
																		'R'	'D'	'C'	'S1'	59.2105
																		'R'	'D'	'C'	'S1'	51.3158
																		'R'	'D'	'C'	'S1'	61.8421
																		'R'	'D'	'C'	'S1'	67.1053
																		'R'	'D'	'C'	'S1'	61.8421
																		'R'	'D'	'C'	'S1'	55.2632
																		'R'	'D'	'C'	'S1'	47.3684
																		'R'	'D'	'C'	'S1'	60.5263
																		'R'	'D'	'C'	'S1'	53.9474
																		'R'	'D'	'C'	'S1'	51.3158
																		'R'	'D'	'C'	'S1'	55.2632
																		'R'	'D'	'C'	'S1'	65.7895
																		'R'	'D'	'C'	'S1'	65.7895
																		'R'	'D'	'C'	'S1'	59.2105
																		'R'	'D'	'C'	'S1'	60.5263
																		'R'	'D'	'C'	'S1'	55.2632
																		'R'	'D'	'C'	'S1'	59.2105
																		'R'	'D'	'C'	'S1'	55.2632
																		'R'	'D'	'C'	'S1'	61.8421
																		'R'	'D'	'C'	'S1'	63.1579
																		'R'	'D'	'C'	'S1'	51.3158
																		'R'	'D'	'C'	'S1'	57.8947
																		'R'	'D'	'C'	'S1'	63.1579
																		'R'	'D'	'C'	'S1'	57.8947
																		'R'	'D'	'C'	'S1'	57.8947
																		'R'	'D'	'C'	'S1'	55.2632
																		'R'	'D'	'C'	'S1'	51.3158
																		'R'	'D'	'C'	'S1'	64.4737
																		'R'	'D'	'C'	'S1'	59.2105
																		'R'	'D'	'C'	'S1'	61.8421
																		'R'	'D'	'C'	'S1'	61.8421
																		'R'	'D'	'C'	'S1'	59.2105
																		'R'	'D'	'C'	'S1'	52.6316
																		'R'	'D'	'C'	'S1'	56.5789
																		'R'	'D'	'C'	'S1'	59.2105
																		'R'	'D'	'C'	'S1'	51.3158
																		'R'	'D'	'C'	'S1'	60.5263
																		'R'	'D'	'C'	'S1'	56.5789
																		'R'	'D'	'C'	'S1'	57.8947
																		'R'	'D'	'C'	'S1'	38.1579
																		'R'	'D'	'C'	'S1'	51.3158
																		'R'	'D'	'C'	'S1'	56.5789
																		'R'	'D'	'C'	'S1'	57.8947
																		'R'	'D'	'C'	'S1'	61.8421
																		'R'	'D'	'C'	'S1'	57.8947
																		'R'	'D'	'C'	'S1'	56.5789
																		'R'	'D'	'C'	'S1'	64.4737
																		'R'	'D'	'C'	'S1'	53.9474
																		'R'	'D'	'NB'	'M1'	65.6716
																		'R'	'D'	'NB'	'M1'	67.1642
																		'R'	'D'	'NB'	'M1'	74.6269
																		'R'	'D'	'NB'	'M1'	62.6866
																		'R'	'D'	'NB'	'M1'	76.1194
																		'R'	'D'	'NB'	'M1'	65.6716
																		'R'	'D'	'NB'	'M1'	67.1642
																		'R'	'D'	'NB'	'M1'	71.6418
																		'R'	'D'	'NB'	'M1'	59.7015
																		'R'	'D'	'NB'	'M1'	65.6716
																		'R'	'D'	'NB'	'M1'	64.1791
																		'R'	'D'	'NB'	'M1'	71.6418
																		'R'	'D'	'NB'	'M1'	58.209
																		'R'	'D'	'NB'	'M1'	64.1791
																		'R'	'D'	'NB'	'M1'	65.6716
																		'R'	'D'	'NB'	'M1'	67.1642
																		'R'	'D'	'NB'	'M1'	58.209
																		'R'	'D'	'NB'	'M1'	59.7015
																		'R'	'D'	'NB'	'M1'	74.6269
																		'R'	'D'	'NB'	'M1'	65.6716
																		'R'	'D'	'NB'	'M1'	58.209
																		'R'	'D'	'NB'	'M1'	58.209
																		'R'	'D'	'NB'	'M1'	61.194
																		'R'	'D'	'NB'	'M1'	74.6269
																		'R'	'D'	'NB'	'M1'	71.6418
																		'R'	'D'	'NB'	'M1'	64.1791
																		'R'	'D'	'NB'	'M1'	62.6866
																		'R'	'D'	'NB'	'M1'	65.6716
																		'R'	'D'	'NB'	'M1'	70.1493
																		'R'	'D'	'NB'	'M1'	64.1791
																		'R'	'D'	'NB'	'M1'	76.1194
																		'R'	'D'	'NB'	'M1'	70.1493
																		'R'	'D'	'NB'	'M1'	71.6418
																		'R'	'D'	'NB'	'M1'	65.6716
																		'R'	'D'	'NB'	'M1'	68.6567
																		'R'	'D'	'NB'	'M1'	67.1642
																		'R'	'D'	'NB'	'M1'	58.209
																		'R'	'D'	'NB'	'M1'	67.1642
																		'R'	'D'	'NB'	'M1'	61.194
																		'R'	'D'	'NB'	'M1'	58.209
																		'R'	'D'	'NB'	'M1'	64.1791
																		'R'	'D'	'NB'	'M1'	58.209
																		'R'	'D'	'NB'	'M1'	65.6716
																		'R'	'D'	'NB'	'M1'	62.6866
																		'R'	'D'	'NB'	'M1'	71.6418
																		'R'	'D'	'NB'	'M1'	68.6567
																		'R'	'D'	'NB'	'M1'	68.6567
																		'R'	'D'	'NB'	'M1'	70.1493
																		'R'	'D'	'NB'	'M1'	64.1791
																		'R'	'D'	'NB'	'M1'	70.1493
																		'R'	'D'	'NB'	'M1'	61.194
																		'R'	'D'	'NB'	'M1'	65.6716
																		'R'	'D'	'NB'	'M1'	65.6716
																		'R'	'D'	'NB'	'M1'	62.6866
																		'R'	'D'	'NB'	'M1'	68.6567
																		'R'	'D'	'NB'	'M1'	71.6418
																		'R'	'D'	'NB'	'M1'	61.194
																		'R'	'D'	'NB'	'M1'	65.6716
																		'R'	'D'	'NB'	'M1'	62.6866
																		'R'	'D'	'NB'	'M1'	73.1343
																		'R'	'D'	'NB'	'M1'	61.194
																		'R'	'D'	'NB'	'M1'	61.194
																		'R'	'D'	'NB'	'M1'	70.1493
																		'R'	'D'	'NB'	'M1'	61.194
																		'R'	'D'	'NB'	'M1'	70.1493
																		'R'	'D'	'NB'	'M1'	61.194
																		'R'	'D'	'NB'	'M1'	56.7164
																		'R'	'D'	'NB'	'M1'	70.1493
																		'R'	'D'	'NB'	'M1'	62.6866
																		'R'	'D'	'NB'	'M1'	65.6716
																		'R'	'D'	'NB'	'M1'	65.6716
																		'R'	'D'	'NB'	'M1'	70.1493
																		'R'	'D'	'NB'	'M1'	59.7015
																		'R'	'D'	'NB'	'M1'	65.6716
																		'R'	'D'	'NB'	'M1'	67.1642
																		'R'	'D'	'NB'	'M1'	65.6716
																		'R'	'D'	'NB'	'M1'	64.1791
																		'R'	'D'	'NB'	'M1'	74.6269
																		'R'	'D'	'NB'	'M1'	59.7015
																		'R'	'D'	'NB'	'M1'	64.1791
																		'R'	'D'	'NB'	'M1'	67.1642
																		'R'	'D'	'NB'	'M1'	67.1642
																		'R'	'D'	'NB'	'M1'	76.1194
																		'R'	'D'	'NB'	'M1'	64.1791
																		'R'	'D'	'NB'	'M1'	76.1194
																		'R'	'D'	'NB'	'M1'	67.1642
																		'R'	'D'	'NB'	'M1'	65.6716
																		'R'	'D'	'NB'	'M1'	68.6567
																		'R'	'D'	'NB'	'M1'	68.6567
																		'R'	'D'	'NB'	'M1'	58.209
																		'R'	'D'	'NB'	'M1'	58.209
																		'R'	'D'	'NB'	'M1'	67.1642
																		'R'	'D'	'NB'	'M1'	56.7164
																		'R'	'D'	'NB'	'M1'	76.1194
																		'R'	'D'	'NB'	'M1'	73.1343
																		'R'	'D'	'NB'	'M1'	71.6418
																		'R'	'D'	'NB'	'M1'	62.6866
																		'R'	'D'	'NB'	'M1'	55.2239
																		'R'	'D'	'NB'	'M1'	73.1343
																		'R'	'D'	'NB'	'M1'	62.6866
																		'R'	'D'	'NB'	'S1'	61.194
																		'R'	'D'	'NB'	'S1'	61.194
																		'R'	'D'	'NB'	'S1'	65.6716
																		'R'	'D'	'NB'	'S1'	61.194
																		'R'	'D'	'NB'	'S1'	64.1791
																		'R'	'D'	'NB'	'S1'	62.6866
																		'R'	'D'	'NB'	'S1'	59.7015
																		'R'	'D'	'NB'	'S1'	67.1642
																		'R'	'D'	'NB'	'S1'	55.2239
																		'R'	'D'	'NB'	'S1'	56.7164
																		'R'	'D'	'NB'	'S1'	52.2388
																		'R'	'D'	'NB'	'S1'	74.6269
																		'R'	'D'	'NB'	'S1'	59.7015
																		'R'	'D'	'NB'	'S1'	53.7313
																		'R'	'D'	'NB'	'S1'	62.6866
																		'R'	'D'	'NB'	'S1'	58.209
																		'R'	'D'	'NB'	'S1'	61.194
																		'R'	'D'	'NB'	'S1'	64.1791
																		'R'	'D'	'NB'	'S1'	55.2239
																		'R'	'D'	'NB'	'S1'	59.7015
																		'R'	'D'	'NB'	'S1'	64.1791
																		'R'	'D'	'NB'	'S1'	55.2239
																		'R'	'D'	'NB'	'S1'	61.194
																		'R'	'D'	'NB'	'S1'	67.1642
																		'R'	'D'	'NB'	'S1'	65.6716
																		'R'	'D'	'NB'	'S1'	67.1642
																		'R'	'D'	'NB'	'S1'	55.2239
																		'R'	'D'	'NB'	'S1'	59.7015
																		'R'	'D'	'NB'	'S1'	67.1642
																		'R'	'D'	'NB'	'S1'	59.7015
																		'R'	'D'	'NB'	'S1'	65.6716
																		'R'	'D'	'NB'	'S1'	64.1791
																		'R'	'D'	'NB'	'S1'	64.1791
																		'R'	'D'	'NB'	'S1'	64.1791
																		'R'	'D'	'NB'	'S1'	64.1791
																		'R'	'D'	'NB'	'S1'	64.1791
																		'R'	'D'	'NB'	'S1'	52.2388
																		'R'	'D'	'NB'	'S1'	53.7313
																		'R'	'D'	'NB'	'S1'	59.7015
																		'R'	'D'	'NB'	'S1'	50.7463
																		'R'	'D'	'NB'	'S1'	47.7612
																		'R'	'D'	'NB'	'S1'	61.194
																		'R'	'D'	'NB'	'S1'	68.6567
																		'R'	'D'	'NB'	'S1'	50.7463
																		'R'	'D'	'NB'	'S1'	62.6866
																		'R'	'D'	'NB'	'S1'	59.7015
																		'R'	'D'	'NB'	'S1'	64.1791
																		'R'	'D'	'NB'	'S1'	59.7015
																		'R'	'D'	'NB'	'S1'	61.194
																		'R'	'D'	'NB'	'S1'	61.194
																		'R'	'D'	'NB'	'S1'	62.6866
																		'R'	'D'	'NB'	'S1'	59.7015
																		'R'	'D'	'NB'	'S1'	62.6866
																		'R'	'D'	'NB'	'S1'	67.1642
																		'R'	'D'	'NB'	'S1'	67.1642
																		'R'	'D'	'NB'	'S1'	56.7164
																		'R'	'D'	'NB'	'S1'	56.7164
																		'R'	'D'	'NB'	'S1'	71.6418
																		'R'	'D'	'NB'	'S1'	59.7015
																		'R'	'D'	'NB'	'S1'	64.1791
																		'R'	'D'	'NB'	'S1'	67.1642
																		'R'	'D'	'NB'	'S1'	59.7015
																		'R'	'D'	'NB'	'S1'	65.6716
																		'R'	'D'	'NB'	'S1'	59.7015
																		'R'	'D'	'NB'	'S1'	64.1791
																		'R'	'D'	'NB'	'S1'	58.209
																		'R'	'D'	'NB'	'S1'	44.7761
																		'R'	'D'	'NB'	'S1'	58.209
																		'R'	'D'	'NB'	'S1'	62.6866
																		'R'	'D'	'NB'	'S1'	64.1791
																		'R'	'D'	'NB'	'S1'	61.194
																		'R'	'D'	'NB'	'S1'	74.6269
																		'R'	'D'	'NB'	'S1'	61.194
																		'R'	'D'	'NB'	'S1'	62.6866
																		'R'	'D'	'NB'	'S1'	56.7164
																		'R'	'D'	'NB'	'S1'	65.6716
																		'R'	'D'	'NB'	'S1'	55.2239
																		'R'	'D'	'NB'	'S1'	67.1642
																		'R'	'D'	'NB'	'S1'	65.6716
																		'R'	'D'	'NB'	'S1'	56.7164
																		'R'	'D'	'NB'	'S1'	55.2239
																		'R'	'D'	'NB'	'S1'	58.209
																		'R'	'D'	'NB'	'S1'	70.1493
																		'R'	'D'	'NB'	'S1'	62.6866
																		'R'	'D'	'NB'	'S1'	59.7015
																		'R'	'D'	'NB'	'S1'	64.1791
																		'R'	'D'	'NB'	'S1'	67.1642
																		'R'	'D'	'NB'	'S1'	59.7015
																		'R'	'D'	'NB'	'S1'	65.6716
																		'R'	'D'	'NB'	'S1'	55.2239
																		'R'	'D'	'NB'	'S1'	62.6866
																		'R'	'D'	'NB'	'S1'	56.7164
																		'R'	'D'	'NB'	'S1'	59.7015
																		'R'	'D'	'NB'	'S1'	64.1791
																		'R'	'D'	'NB'	'S1'	65.6716
																		'R'	'D'	'NB'	'S1'	68.6567
																		'R'	'D'	'NB'	'S1'	64.1791
																		'R'	'D'	'NB'	'S1'	55.2239
																		'R'	'D'	'NB'	'S1'	73.1343
																		'R'	'D'	'NB'	'S1'	65.6716
																		'Y'	'D'	'C'	'M1'	43.1034
																		'Y'	'D'	'C'	'M1'	50
																		'Y'	'D'	'C'	'M1'	43.1034
																		'Y'	'D'	'C'	'M1'	50
																		'Y'	'D'	'C'	'M1'	43.1034
																		'Y'	'D'	'C'	'M1'	50
																		'Y'	'D'	'C'	'M1'	44.8276
																		'Y'	'D'	'C'	'M1'	63.7931
																		'Y'	'D'	'C'	'M1'	41.3793
																		'Y'	'D'	'C'	'M1'	50
																		'Y'	'D'	'C'	'M1'	55.1724
																		'Y'	'D'	'C'	'M1'	55.1724
																		'Y'	'D'	'C'	'M1'	48.2759
																		'Y'	'D'	'C'	'M1'	53.4483
																		'Y'	'D'	'C'	'M1'	46.5517
																		'Y'	'D'	'C'	'M1'	44.8276
																		'Y'	'D'	'C'	'M1'	63.7931
																		'Y'	'D'	'C'	'M1'	60.3448
																		'Y'	'D'	'C'	'M1'	44.8276
																		'Y'	'D'	'C'	'M1'	39.6552
																		'Y'	'D'	'C'	'M1'	58.6207
																		'Y'	'D'	'C'	'M1'	50
																		'Y'	'D'	'C'	'M1'	50
																		'Y'	'D'	'C'	'M1'	43.1034
																		'Y'	'D'	'C'	'M1'	37.931
																		'Y'	'D'	'C'	'M1'	53.4483
																		'Y'	'D'	'C'	'M1'	44.8276
																		'Y'	'D'	'C'	'M1'	48.2759
																		'Y'	'D'	'C'	'M1'	50
																		'Y'	'D'	'C'	'M1'	50
																		'Y'	'D'	'C'	'M1'	39.6552
																		'Y'	'D'	'C'	'M1'	58.6207
																		'Y'	'D'	'C'	'M1'	41.3793
																		'Y'	'D'	'C'	'M1'	62.069
																		'Y'	'D'	'C'	'M1'	67.2414
																		'Y'	'D'	'C'	'M1'	48.2759
																		'Y'	'D'	'C'	'M1'	46.5517
																		'Y'	'D'	'C'	'M1'	46.5517
																		'Y'	'D'	'C'	'M1'	51.7241
																		'Y'	'D'	'C'	'M1'	58.6207
																		'Y'	'D'	'C'	'M1'	44.8276
																		'Y'	'D'	'C'	'M1'	53.4483
																		'Y'	'D'	'C'	'M1'	44.8276
																		'Y'	'D'	'C'	'M1'	50
																		'Y'	'D'	'C'	'M1'	48.2759
																		'Y'	'D'	'C'	'M1'	50
																		'Y'	'D'	'C'	'M1'	50
																		'Y'	'D'	'C'	'M1'	63.7931
																		'Y'	'D'	'C'	'M1'	50
																		'Y'	'D'	'C'	'M1'	60.3448
																		'Y'	'D'	'C'	'M1'	62.069
																		'Y'	'D'	'C'	'M1'	41.3793
																		'Y'	'D'	'C'	'M1'	46.5517
																		'Y'	'D'	'C'	'M1'	46.5517
																		'Y'	'D'	'C'	'M1'	56.8966
																		'Y'	'D'	'C'	'M1'	51.7241
																		'Y'	'D'	'C'	'M1'	44.8276
																		'Y'	'D'	'C'	'M1'	46.5517
																		'Y'	'D'	'C'	'M1'	44.8276
																		'Y'	'D'	'C'	'M1'	55.1724
																		'Y'	'D'	'C'	'M1'	51.7241
																		'Y'	'D'	'C'	'M1'	55.1724
																		'Y'	'D'	'C'	'M1'	51.7241
																		'Y'	'D'	'C'	'M1'	51.7241
																		'Y'	'D'	'C'	'M1'	46.5517
																		'Y'	'D'	'C'	'M1'	50
																		'Y'	'D'	'C'	'M1'	41.3793
																		'Y'	'D'	'C'	'M1'	62.069
																		'Y'	'D'	'C'	'M1'	55.1724
																		'Y'	'D'	'C'	'M1'	60.3448
																		'Y'	'D'	'C'	'M1'	31.0345
																		'Y'	'D'	'C'	'M1'	44.8276
																		'Y'	'D'	'C'	'M1'	53.4483
																		'Y'	'D'	'C'	'M1'	46.5517
																		'Y'	'D'	'C'	'M1'	50
																		'Y'	'D'	'C'	'M1'	53.4483
																		'Y'	'D'	'C'	'M1'	50
																		'Y'	'D'	'C'	'M1'	55.1724
																		'Y'	'D'	'C'	'M1'	53.4483
																		'Y'	'D'	'C'	'M1'	37.931
																		'Y'	'D'	'C'	'M1'	53.4483
																		'Y'	'D'	'C'	'M1'	60.3448
																		'Y'	'D'	'C'	'M1'	58.6207
																		'Y'	'D'	'C'	'M1'	39.6552
																		'Y'	'D'	'C'	'M1'	58.6207
																		'Y'	'D'	'C'	'M1'	36.2069
																		'Y'	'D'	'C'	'M1'	56.8966
																		'Y'	'D'	'C'	'M1'	55.1724
																		'Y'	'D'	'C'	'M1'	55.1724
																		'Y'	'D'	'C'	'M1'	37.931
																		'Y'	'D'	'C'	'M1'	62.069
																		'Y'	'D'	'C'	'M1'	50
																		'Y'	'D'	'C'	'M1'	53.4483
																		'Y'	'D'	'C'	'M1'	60.3448
																		'Y'	'D'	'C'	'M1'	53.4483
																		'Y'	'D'	'C'	'M1'	44.8276
																		'Y'	'D'	'C'	'M1'	34.4828
																		'Y'	'D'	'C'	'M1'	41.3793
																		'Y'	'D'	'C'	'M1'	43.1034
																		'Y'	'D'	'C'	'M1'	60.3448
																		'Y'	'D'	'C'	'S1'	43.1034
																		'Y'	'D'	'C'	'S1'	37.931
																		'Y'	'D'	'C'	'S1'	55.1724
																		'Y'	'D'	'C'	'S1'	51.7241
																		'Y'	'D'	'C'	'S1'	44.8276
																		'Y'	'D'	'C'	'S1'	41.3793
																		'Y'	'D'	'C'	'S1'	32.7586
																		'Y'	'D'	'C'	'S1'	46.5517
																		'Y'	'D'	'C'	'S1'	39.6552
																		'Y'	'D'	'C'	'S1'	50
																		'Y'	'D'	'C'	'S1'	44.8276
																		'Y'	'D'	'C'	'S1'	48.2759
																		'Y'	'D'	'C'	'S1'	51.7241
																		'Y'	'D'	'C'	'S1'	46.5517
																		'Y'	'D'	'C'	'S1'	44.8276
																		'Y'	'D'	'C'	'S1'	46.5517
																		'Y'	'D'	'C'	'S1'	50
																		'Y'	'D'	'C'	'S1'	41.3793
																		'Y'	'D'	'C'	'S1'	39.6552
																		'Y'	'D'	'C'	'S1'	50
																		'Y'	'D'	'C'	'S1'	48.2759
																		'Y'	'D'	'C'	'S1'	36.2069
																		'Y'	'D'	'C'	'S1'	55.1724
																		'Y'	'D'	'C'	'S1'	51.7241
																		'Y'	'D'	'C'	'S1'	44.8276
																		'Y'	'D'	'C'	'S1'	37.931
																		'Y'	'D'	'C'	'S1'	37.931
																		'Y'	'D'	'C'	'S1'	41.3793
																		'Y'	'D'	'C'	'S1'	39.6552
																		'Y'	'D'	'C'	'S1'	48.2759
																		'Y'	'D'	'C'	'S1'	48.2759
																		'Y'	'D'	'C'	'S1'	48.2759
																		'Y'	'D'	'C'	'S1'	62.069
																		'Y'	'D'	'C'	'S1'	37.931
																		'Y'	'D'	'C'	'S1'	56.8966
																		'Y'	'D'	'C'	'S1'	41.3793
																		'Y'	'D'	'C'	'S1'	36.2069
																		'Y'	'D'	'C'	'S1'	32.7586
																		'Y'	'D'	'C'	'S1'	48.2759
																		'Y'	'D'	'C'	'S1'	43.1034
																		'Y'	'D'	'C'	'S1'	41.3793
																		'Y'	'D'	'C'	'S1'	37.931
																		'Y'	'D'	'C'	'S1'	46.5517
																		'Y'	'D'	'C'	'S1'	37.931
																		'Y'	'D'	'C'	'S1'	34.4828
																		'Y'	'D'	'C'	'S1'	51.7241
																		'Y'	'D'	'C'	'S1'	48.2759
																		'Y'	'D'	'C'	'S1'	41.3793
																		'Y'	'D'	'C'	'S1'	39.6552
																		'Y'	'D'	'C'	'S1'	48.2759
																		'Y'	'D'	'C'	'S1'	43.1034
																		'Y'	'D'	'C'	'S1'	48.2759
																		'Y'	'D'	'C'	'S1'	55.1724
																		'Y'	'D'	'C'	'S1'	37.931
																		'Y'	'D'	'C'	'S1'	46.5517
																		'Y'	'D'	'C'	'S1'	43.1034
																		'Y'	'D'	'C'	'S1'	27.5862
																		'Y'	'D'	'C'	'S1'	41.3793
																		'Y'	'D'	'C'	'S1'	46.5517
																		'Y'	'D'	'C'	'S1'	39.6552
																		'Y'	'D'	'C'	'S1'	43.1034
																		'Y'	'D'	'C'	'S1'	50
																		'Y'	'D'	'C'	'S1'	53.4483
																		'Y'	'D'	'C'	'S1'	58.6207
																		'Y'	'D'	'C'	'S1'	36.2069
																		'Y'	'D'	'C'	'S1'	50
																		'Y'	'D'	'C'	'S1'	43.1034
																		'Y'	'D'	'C'	'S1'	56.8966
																		'Y'	'D'	'C'	'S1'	50
																		'Y'	'D'	'C'	'S1'	50
																		'Y'	'D'	'C'	'S1'	50
																		'Y'	'D'	'C'	'S1'	44.8276
																		'Y'	'D'	'C'	'S1'	34.4828
																		'Y'	'D'	'C'	'S1'	39.6552
																		'Y'	'D'	'C'	'S1'	51.7241
																		'Y'	'D'	'C'	'S1'	50
																		'Y'	'D'	'C'	'S1'	39.6552
																		'Y'	'D'	'C'	'S1'	48.2759
																		'Y'	'D'	'C'	'S1'	43.1034
																		'Y'	'D'	'C'	'S1'	43.1034
																		'Y'	'D'	'C'	'S1'	39.6552
																		'Y'	'D'	'C'	'S1'	37.931
																		'Y'	'D'	'C'	'S1'	44.8276
																		'Y'	'D'	'C'	'S1'	37.931
																		'Y'	'D'	'C'	'S1'	43.1034
																		'Y'	'D'	'C'	'S1'	43.1034
																		'Y'	'D'	'C'	'S1'	44.8276
																		'Y'	'D'	'C'	'S1'	39.6552
																		'Y'	'D'	'C'	'S1'	43.1034
																		'Y'	'D'	'C'	'S1'	41.3793
																		'Y'	'D'	'C'	'S1'	31.0345
																		'Y'	'D'	'C'	'S1'	41.3793
																		'Y'	'D'	'C'	'S1'	48.2759
																		'Y'	'D'	'C'	'S1'	51.7241
																		'Y'	'D'	'C'	'S1'	60.3448
																		'Y'	'D'	'C'	'S1'	39.6552
																		'Y'	'D'	'C'	'S1'	44.8276
																		'Y'	'D'	'C'	'S1'	34.4828
																		'Y'	'D'	'C'	'S1'	36.2069
																		'Y'	'D'	'C'	'S1'	46.5517
																		'Y'	'D'	'NB'	'M1'	50
																		'Y'	'D'	'NB'	'M1'	51.3514
																		'Y'	'D'	'NB'	'M1'	43.2432
																		'Y'	'D'	'NB'	'M1'	40.5405
																		'Y'	'D'	'NB'	'M1'	37.8378
																		'Y'	'D'	'NB'	'M1'	51.3514
																		'Y'	'D'	'NB'	'M1'	43.2432
																		'Y'	'D'	'NB'	'M1'	45.9459
																		'Y'	'D'	'NB'	'M1'	43.2432
																		'Y'	'D'	'NB'	'M1'	62.1622
																		'Y'	'D'	'NB'	'M1'	41.8919
																		'Y'	'D'	'NB'	'M1'	45.9459
																		'Y'	'D'	'NB'	'M1'	62.1622
																		'Y'	'D'	'NB'	'M1'	37.8378
																		'Y'	'D'	'NB'	'M1'	44.5946
																		'Y'	'D'	'NB'	'M1'	39.1892
																		'Y'	'D'	'NB'	'M1'	36.4865
																		'Y'	'D'	'NB'	'M1'	45.9459
																		'Y'	'D'	'NB'	'M1'	48.6486
																		'Y'	'D'	'NB'	'M1'	39.1892
																		'Y'	'D'	'NB'	'M1'	50
																		'Y'	'D'	'NB'	'M1'	45.9459
																		'Y'	'D'	'NB'	'M1'	47.2973
																		'Y'	'D'	'NB'	'M1'	47.2973
																		'Y'	'D'	'NB'	'M1'	48.6486
																		'Y'	'D'	'NB'	'M1'	47.2973
																		'Y'	'D'	'NB'	'M1'	47.2973
																		'Y'	'D'	'NB'	'M1'	36.4865
																		'Y'	'D'	'NB'	'M1'	48.6486
																		'Y'	'D'	'NB'	'M1'	45.9459
																		'Y'	'D'	'NB'	'M1'	50
																		'Y'	'D'	'NB'	'M1'	45.9459
																		'Y'	'D'	'NB'	'M1'	41.8919
																		'Y'	'D'	'NB'	'M1'	47.2973
																		'Y'	'D'	'NB'	'M1'	43.2432
																		'Y'	'D'	'NB'	'M1'	33.7838
																		'Y'	'D'	'NB'	'M1'	44.5946
																		'Y'	'D'	'NB'	'M1'	35.1351
																		'Y'	'D'	'NB'	'M1'	52.7027
																		'Y'	'D'	'NB'	'M1'	40.5405
																		'Y'	'D'	'NB'	'M1'	52.7027
																		'Y'	'D'	'NB'	'M1'	40.5405
																		'Y'	'D'	'NB'	'M1'	56.7568
																		'Y'	'D'	'NB'	'M1'	54.0541
																		'Y'	'D'	'NB'	'M1'	41.8919
																		'Y'	'D'	'NB'	'M1'	50
																		'Y'	'D'	'NB'	'M1'	50
																		'Y'	'D'	'NB'	'M1'	43.2432
																		'Y'	'D'	'NB'	'M1'	54.0541
																		'Y'	'D'	'NB'	'M1'	50
																		'Y'	'D'	'NB'	'M1'	44.5946
																		'Y'	'D'	'NB'	'M1'	40.5405
																		'Y'	'D'	'NB'	'M1'	45.9459
																		'Y'	'D'	'NB'	'M1'	41.8919
																		'Y'	'D'	'NB'	'M1'	52.7027
																		'Y'	'D'	'NB'	'M1'	45.9459
																		'Y'	'D'	'NB'	'M1'	47.2973
																		'Y'	'D'	'NB'	'M1'	45.9459
																		'Y'	'D'	'NB'	'M1'	54.0541
																		'Y'	'D'	'NB'	'M1'	43.2432
																		'Y'	'D'	'NB'	'M1'	50
																		'Y'	'D'	'NB'	'M1'	44.5946
																		'Y'	'D'	'NB'	'M1'	39.1892
																		'Y'	'D'	'NB'	'M1'	43.2432
																		'Y'	'D'	'NB'	'M1'	36.4865
																		'Y'	'D'	'NB'	'M1'	43.2432
																		'Y'	'D'	'NB'	'M1'	50
																		'Y'	'D'	'NB'	'M1'	48.6486
																		'Y'	'D'	'NB'	'M1'	35.1351
																		'Y'	'D'	'NB'	'M1'	51.3514
																		'Y'	'D'	'NB'	'M1'	50
																		'Y'	'D'	'NB'	'M1'	62.1622
																		'Y'	'D'	'NB'	'M1'	48.6486
																		'Y'	'D'	'NB'	'M1'	48.6486
																		'Y'	'D'	'NB'	'M1'	39.1892
																		'Y'	'D'	'NB'	'M1'	52.7027
																		'Y'	'D'	'NB'	'M1'	41.8919
																		'Y'	'D'	'NB'	'M1'	47.2973
																		'Y'	'D'	'NB'	'M1'	47.2973
																		'Y'	'D'	'NB'	'M1'	43.2432
																		'Y'	'D'	'NB'	'M1'	55.4054
																		'Y'	'D'	'NB'	'M1'	54.0541
																		'Y'	'D'	'NB'	'M1'	54.0541
																		'Y'	'D'	'NB'	'M1'	45.9459
																		'Y'	'D'	'NB'	'M1'	51.3514
																		'Y'	'D'	'NB'	'M1'	37.8378
																		'Y'	'D'	'NB'	'M1'	45.9459
																		'Y'	'D'	'NB'	'M1'	48.6486
																		'Y'	'D'	'NB'	'M1'	45.9459
																		'Y'	'D'	'NB'	'M1'	48.6486
																		'Y'	'D'	'NB'	'M1'	39.1892
																		'Y'	'D'	'NB'	'M1'	48.6486
																		'Y'	'D'	'NB'	'M1'	48.6486
																		'Y'	'D'	'NB'	'M1'	47.2973
																		'Y'	'D'	'NB'	'M1'	44.5946
																		'Y'	'D'	'NB'	'M1'	45.9459
																		'Y'	'D'	'NB'	'M1'	43.2432
																		'Y'	'D'	'NB'	'M1'	44.5946
																		'Y'	'D'	'NB'	'M1'	52.7027
																		'Y'	'D'	'NB'	'M1'	52.7027
																		'Y'	'D'	'NB'	'S1'	47.2973
																		'Y'	'D'	'NB'	'S1'	43.2432
																		'Y'	'D'	'NB'	'S1'	51.3514
																		'Y'	'D'	'NB'	'S1'	44.5946
																		'Y'	'D'	'NB'	'S1'	51.3514
																		'Y'	'D'	'NB'	'S1'	45.9459
																		'Y'	'D'	'NB'	'S1'	44.5946
																		'Y'	'D'	'NB'	'S1'	48.6486
																		'Y'	'D'	'NB'	'S1'	43.2432
																		'Y'	'D'	'NB'	'S1'	48.6486
																		'Y'	'D'	'NB'	'S1'	36.4865
																		'Y'	'D'	'NB'	'S1'	51.3514
																		'Y'	'D'	'NB'	'S1'	47.2973
																		'Y'	'D'	'NB'	'S1'	44.5946
																		'Y'	'D'	'NB'	'S1'	39.1892
																		'Y'	'D'	'NB'	'S1'	48.6486
																		'Y'	'D'	'NB'	'S1'	45.9459
																		'Y'	'D'	'NB'	'S1'	51.3514
																		'Y'	'D'	'NB'	'S1'	54.0541
																		'Y'	'D'	'NB'	'S1'	45.9459
																		'Y'	'D'	'NB'	'S1'	50
																		'Y'	'D'	'NB'	'S1'	50
																		'Y'	'D'	'NB'	'S1'	36.4865
																		'Y'	'D'	'NB'	'S1'	43.2432
																		'Y'	'D'	'NB'	'S1'	51.3514
																		'Y'	'D'	'NB'	'S1'	41.8919
																		'Y'	'D'	'NB'	'S1'	51.3514
																		'Y'	'D'	'NB'	'S1'	44.5946
																		'Y'	'D'	'NB'	'S1'	39.1892
																		'Y'	'D'	'NB'	'S1'	41.8919
																		'Y'	'D'	'NB'	'S1'	36.4865
																		'Y'	'D'	'NB'	'S1'	36.4865
																		'Y'	'D'	'NB'	'S1'	41.8919
																		'Y'	'D'	'NB'	'S1'	40.5405
																		'Y'	'D'	'NB'	'S1'	48.6486
																		'Y'	'D'	'NB'	'S1'	41.8919
																		'Y'	'D'	'NB'	'S1'	54.0541
																		'Y'	'D'	'NB'	'S1'	35.1351
																		'Y'	'D'	'NB'	'S1'	47.2973
																		'Y'	'D'	'NB'	'S1'	43.2432
																		'Y'	'D'	'NB'	'S1'	50
																		'Y'	'D'	'NB'	'S1'	39.1892
																		'Y'	'D'	'NB'	'S1'	56.7568
																		'Y'	'D'	'NB'	'S1'	41.8919
																		'Y'	'D'	'NB'	'S1'	35.1351
																		'Y'	'D'	'NB'	'S1'	44.5946
																		'Y'	'D'	'NB'	'S1'	45.9459
																		'Y'	'D'	'NB'	'S1'	43.2432
																		'Y'	'D'	'NB'	'S1'	47.2973
																		'Y'	'D'	'NB'	'S1'	40.5405
																		'Y'	'D'	'NB'	'S1'	48.6486
																		'Y'	'D'	'NB'	'S1'	48.6486
																		'Y'	'D'	'NB'	'S1'	50
																		'Y'	'D'	'NB'	'S1'	41.8919
																		'Y'	'D'	'NB'	'S1'	48.6486
																		'Y'	'D'	'NB'	'S1'	47.2973
																		'Y'	'D'	'NB'	'S1'	39.1892
																		'Y'	'D'	'NB'	'S1'	41.8919
																		'Y'	'D'	'NB'	'S1'	40.5405
																		'Y'	'D'	'NB'	'S1'	45.9459
																		'Y'	'D'	'NB'	'S1'	44.5946
																		'Y'	'D'	'NB'	'S1'	45.9459
																		'Y'	'D'	'NB'	'S1'	44.5946
																		'Y'	'D'	'NB'	'S1'	36.4865
																		'Y'	'D'	'NB'	'S1'	48.6486
																		'Y'	'D'	'NB'	'S1'	43.2432
																		'Y'	'D'	'NB'	'S1'	39.1892
																		'Y'	'D'	'NB'	'S1'	54.0541
																		'Y'	'D'	'NB'	'S1'	47.2973
																		'Y'	'D'	'NB'	'S1'	54.0541
																		'Y'	'D'	'NB'	'S1'	44.5946
																		'Y'	'D'	'NB'	'S1'	45.9459
																		'Y'	'D'	'NB'	'S1'	58.1081
																		'Y'	'D'	'NB'	'S1'	44.5946
																		'Y'	'D'	'NB'	'S1'	47.2973
																		'Y'	'D'	'NB'	'S1'	45.9459
																		'Y'	'D'	'NB'	'S1'	48.6486
																		'Y'	'D'	'NB'	'S1'	48.6486
																		'Y'	'D'	'NB'	'S1'	48.6486
																		'Y'	'D'	'NB'	'S1'	36.4865
																		'Y'	'D'	'NB'	'S1'	50
																		'Y'	'D'	'NB'	'S1'	48.6486
																		'Y'	'D'	'NB'	'S1'	55.4054
																		'Y'	'D'	'NB'	'S1'	47.2973
																		'Y'	'D'	'NB'	'S1'	44.5946
																		'Y'	'D'	'NB'	'S1'	45.9459
																		'Y'	'D'	'NB'	'S1'	52.7027
																		'Y'	'D'	'NB'	'S1'	48.6486
																		'Y'	'D'	'NB'	'S1'	47.2973
																		'Y'	'D'	'NB'	'S1'	47.2973
																		'Y'	'D'	'NB'	'S1'	40.5405
																		'Y'	'D'	'NB'	'S1'	44.5946
																		'Y'	'D'	'NB'	'S1'	39.1892
																		'Y'	'D'	'NB'	'S1'	58.1081
																		'Y'	'D'	'NB'	'S1'	51.3514
																		'Y'	'D'	'NB'	'S1'	45.9459
																		'Y'	'D'	'NB'	'S1'	41.8919
																		'Y'	'D'	'NB'	'S1'	45.9459
																		'Y'	'D'	'NB'	'S1'	52.7027
																		'Y'	'D'	'NB'	'S1'	48.6486
