# Supplementary material for: 3D directional tuning in the orofacial sensorimotor cortex during natural feeding and drinking
Source: eLife. 2025 Oct 21;13:RP101325. doi: 10.7554/eLife.101325 (PMC12539803; doi:10.7554/eLife.101325)
Supplement: Figure 13—source data 2. [file elife-101325-fig13-data2.xlsx]

## Sheet: Sheet1
Figure 13 - Source Data 2
Figure 13B: LSTM decoding performance
	Decoding Accuracies																	Linear regression model with interactions
	Feeding R Control		Feeding R Nerve Block		Feeding Y Control		Feeding Y Nerve Block		Drinking R Control		Drinking R Nerve Block		Drinking Y Control		Drinking Y Nerve Block			Independent variables	Coefficient	ste	t-stat	p-value
	MIo	SIo	MIo	SIo	MIo	SIo	MIo	SIo	MIo	SIo	MIo	SIo	MIo	SIo	MIo	SIo		Animal	-0.13348	0.023996	-5.5624	4.9575e-08
	0.852179	0.31206	0.72754	0.0297235	0.669141	0.419898	0.564065	0.15364	0.782043	0.765494	0.465197	0.0301758	0.604245	0.0459218	0.367576	0.0321886		Behavior	-0.086027	0.023996	-3.585	0.00037993
	0.811876	0.313993	0.720293	0.0368775	0.704969	0.47853	0.49673	0.185618	0.880308	0.357317	0.459465	0.15682	0.275883	0.0501269	0.0139854	0.00029846		Condition	-0.19149	0.023996	-7.9799	1.6595e-14
	0.795635	0.319356	0.763303	0.0942864	0.780758	0.30045	0.583085	0.178145	0.78856	0.103571	0.650935	0.0661665	0.686822	0.141688	0.139114	0.0219021		Region	-0.58223	0.023996	-24.263	7.3355e-80
	0.821176	0.213846	0.734172	0.0749502	0.749965	0.378539	0.507498	0.0622026	0.771838	0.197427	0.501621	0.213519	0.279619	0.16842	0.432593	0.00234867		Animal:Behavior	-0.17851	0.023996	-7.439	6.5523e-13
	0.801435	0.24133	0.733292	0.0535733	0.769925	0.268969	0.550194	0.114957	0.908267	0.331942	0.655684	0.117255	0.56897	0.0983595	0.579699	0.200657		Animal:Condition	0.022223	0.023996	0.92612	0.35496
	0.825825	0.178453	0.695939	0.0507175	0.68725	0.631217	0.467154	0.18148	0.913887	0.00328837	0.636407	0.0635678	0.545293	0.382258	0.345917	0.0722802		Animal:Region	0.24902	0.023996	10.377	1.9572e-22
	0.747061	0.231919	0.6056	0.061147	0.623228	0.420483	0.599199	0.236286	0.812077	0.266411	0.558415	0.103527	0.309492	0.0820285	0.372806	0.00401514		Behavior:Condition	0.0050054	0.023996	0.20859	0.83488
	0.756102	0.32925	0.702467	0.0720396	0.660238	0.386005	0.466581	0.181315	0.980756	8.38e-06	0.517488	1.15e-32	0.4504	0.16819	0.366408	0.0717743		Behavior:Region	0.070392	0.023996	2.9335	0.0035506
	0.827212	0.243796	0.734444	0.0418236	0.653283	0.479334	0.38248	0.11814	0.756254	0.581263	0.336486	0.421061	0.601598	0.0512053	0.356543	0.213458		Condition:Region	0.022226	0.023996	0.92622	0.35491
	0.789555	0.276282	0.724765	0.0392203	0.693807	0.488331	0.389336	0.202483	0.882958	0.291037	0.536191	0.0725985	0.630345	0.29915	0.264733	0.0452562		Constant	0.83685
	0.752507	0.251586	0.752674	0.0309987	0.664676	0.424999	0.634682	0.253439	0.75649	0.0743314	0.721336	0.0438724	0.692638	0.112942	0.31992	0.0365678		R2 = 0.816
	0.796817	0.385002	0.775291	0.067756	0.592619	0.416114	0.729991	0.110318	0.841009	0.226389	0.569799	0.0233126	0.381244	0.0373615	0.164323	0.0978462		F-ratio = 173
	0.738187	0.274112	0.74189	0.0619647	0.616467	0.27915	0.663497	0.192966	0.713781	0.0729193	0.622552	0.0552797	0.235771	0.00942853	0.00838497	0.207709		n = 400
	0.760358	0.290825	0.785782	0.0423762	0.647073	0.35584	0.586797	0.152766	0.840722	0.00177057	0.718037	0.345597	0.490576	0.00215236	0.0112804	0.161531
	0.732532	0.325223	0.687908	0.0544494	0.671309	0.356544	0.570946	0.183183	0.785038	0.0182695	0.486267	0.240919	0.691374	0.00025153	0.148703	0.232643		Input table
	0.838075	0.25488	0.714194	0.0555393	0.807536	0.495212	0.575991	0.160598	0.879905	0.149336	0.39724	0.00428784	0.270511	0.228724	0.167491	0.0276252		Animal	Behavior	Condition	Region	Accuracy
	0.832855	0.256861	0.598573	0.0846091	0.573396	0.56075	0.379991	0.318553	0.802228	0.0935724	0.278321	0.00224648	0.299947	0.348778	0.0136288	0.0001177		R'	F'	C'	M1'	0.852179
	0.811199	0.295739	0.738853	0.0492088	0.744252	0.516543	0.555576	0.202619	0.820214	0.0304128	0.00691876	0.0534891	0.142247	0.135138	0.137834	0.00365225		R'	F'	C'	M1'	0.811876
	0.795521	0.266863	0.67362	0.0370967	0.762901	0.576744	0.573837	0.16118	0.760426	0.0908751	0.542567	0.216045	0.40598	0.090908	0.172639	0.0064635		R'	F'	C'	M1'	0.795635
	0.789402	0.249105	0.713092	0.0421184	0.773938	0.500665	0.675529	0.160853	0.654209	0.323644	0.343041	0.342857	0.285902	0.0994397	0.118551	0.0453196		R'	F'	C'	M1'	0.821176
	0.727862	0.264489	0.714182	0.063609	0.534309	0.255764	0.635768	0.112384	0.799763	0.379312	0.535508	0.0340157	0.70039	0.458408	0.254735	0.180946		R'	F'	C'	M1'	0.801435
	0.784416	0.301016	0.580467	0.0389249	0.66612	0.470676	0.493999	0.142939	0.809197	0.0439256	0.34781	0.00097206	0.757587	0.00523586	0.357742	0.109778		R'	F'	C'	M1'	0.825825
	0.72017	0.300583	0.648415	0.0295846	0.645449	0.449148	0.688939	0.115855	0.847182	0.167216	0.43093	0.0460854	0.557809	0.00041299	0.25111	0.00870299		R'	F'	C'	M1'	0.747061
	0.751943	0.28866	0.661118	0.012612	0.440221	0.324547	0.54445	0.225591	0.744448	0.235797	0.478368	8.39e-05	0.208413	0.0453912	0.524371	0.0940452		R'	F'	C'	M1'	0.756102
	0.745373	0.375356	0.694438	0.0610944	0.660267	0.451384	0.655004	0.211019	0.696812	0.351915	0.681485	0.204012	0.546997	0.0485558	0.497661	0.089846		R'	F'	C'	M1'	0.827212
																		R'	F'	C'	M1'	0.789555
mean	0.784211	0.281623	0.704893	0.051452	0.671724	0.427434	0.558853	0.172741	0.809135	0.206298	0.499123	0.114311	0.464802	0.124419	0.25551	0.0786789		R'	F'	C'	M1'	0.752507
std	0.0384367	0.0468848	0.0527773	0.0188431	0.0836039	0.0977234	0.0946763	0.0540443	0.073731	0.18971	0.159258	0.121601	0.184463	0.127179	0.165471	0.077448		R'	F'	C'	M1'	0.796817
																		R'	F'	C'	M1'	0.738187
																		R'	F'	C'	M1'	0.760358
																		R'	F'	C'	M1'	0.732532
																		R'	F'	C'	M1'	0.838075
																		R'	F'	C'	M1'	0.832855
																		R'	F'	C'	M1'	0.811199
																		R'	F'	C'	M1'	0.795521
																		R'	F'	C'	M1'	0.789402
																		R'	F'	C'	M1'	0.727862
																		R'	F'	C'	M1'	0.784416
																		R'	F'	C'	M1'	0.72017
																		R'	F'	C'	M1'	0.751943
																		R'	F'	C'	M1'	0.745373
																		R'	F'	C'	S1'	0.31206
																		R'	F'	C'	S1'	0.313993
																		R'	F'	C'	S1'	0.319356
																		R'	F'	C'	S1'	0.213846
																		R'	F'	C'	S1'	0.24133
																		R'	F'	C'	S1'	0.178453
																		R'	F'	C'	S1'	0.231919
																		R'	F'	C'	S1'	0.32925
																		R'	F'	C'	S1'	0.243796
																		R'	F'	C'	S1'	0.276282
																		R'	F'	C'	S1'	0.251586
																		R'	F'	C'	S1'	0.385002
																		R'	F'	C'	S1'	0.274112
																		R'	F'	C'	S1'	0.290825
																		R'	F'	C'	S1'	0.325223
																		R'	F'	C'	S1'	0.25488
																		R'	F'	C'	S1'	0.256861
																		R'	F'	C'	S1'	0.295739
																		R'	F'	C'	S1'	0.266863
																		R'	F'	C'	S1'	0.249105
																		R'	F'	C'	S1'	0.264489
																		R'	F'	C'	S1'	0.301016
																		R'	F'	C'	S1'	0.300583
																		R'	F'	C'	S1'	0.28866
																		R'	F'	C'	S1'	0.375356
																		R'	F'	NB'	M1'	0.72754
																		R'	F'	NB'	M1'	0.720293
																		R'	F'	NB'	M1'	0.763303
																		R'	F'	NB'	M1'	0.734172
																		R'	F'	NB'	M1'	0.733292
																		R'	F'	NB'	M1'	0.695939
																		R'	F'	NB'	M1'	0.6056
																		R'	F'	NB'	M1'	0.702467
																		R'	F'	NB'	M1'	0.734444
																		R'	F'	NB'	M1'	0.724765
																		R'	F'	NB'	M1'	0.752674
																		R'	F'	NB'	M1'	0.775291
																		R'	F'	NB'	M1'	0.74189
																		R'	F'	NB'	M1'	0.785782
																		R'	F'	NB'	M1'	0.687908
																		R'	F'	NB'	M1'	0.714194
																		R'	F'	NB'	M1'	0.598573
																		R'	F'	NB'	M1'	0.738853
																		R'	F'	NB'	M1'	0.67362
																		R'	F'	NB'	M1'	0.713092
																		R'	F'	NB'	M1'	0.714182
																		R'	F'	NB'	M1'	0.580467
																		R'	F'	NB'	M1'	0.648415
																		R'	F'	NB'	M1'	0.661118
																		R'	F'	NB'	M1'	0.694438
																		R'	F'	NB'	S1'	0.0297235
																		R'	F'	NB'	S1'	0.0368775
																		R'	F'	NB'	S1'	0.0942864
																		R'	F'	NB'	S1'	0.0749502
																		R'	F'	NB'	S1'	0.0535733
																		R'	F'	NB'	S1'	0.0507175
																		R'	F'	NB'	S1'	0.061147
																		R'	F'	NB'	S1'	0.0720396
																		R'	F'	NB'	S1'	0.0418236
																		R'	F'	NB'	S1'	0.0392203
																		R'	F'	NB'	S1'	0.0309987
																		R'	F'	NB'	S1'	0.067756
																		R'	F'	NB'	S1'	0.0619647
																		R'	F'	NB'	S1'	0.0423762
																		R'	F'	NB'	S1'	0.0544494
																		R'	F'	NB'	S1'	0.0555393
																		R'	F'	NB'	S1'	0.0846091
																		R'	F'	NB'	S1'	0.0492088
																		R'	F'	NB'	S1'	0.0370967
																		R'	F'	NB'	S1'	0.0421184
																		R'	F'	NB'	S1'	0.063609
																		R'	F'	NB'	S1'	0.0389249
																		R'	F'	NB'	S1'	0.0295846
																		R'	F'	NB'	S1'	0.012612
																		R'	F'	NB'	S1'	0.0610944
																		Y'	F'	C'	M1'	0.669141
																		Y'	F'	C'	M1'	0.704969
																		Y'	F'	C'	M1'	0.780758
																		Y'	F'	C'	M1'	0.749965
																		Y'	F'	C'	M1'	0.769925
																		Y'	F'	C'	M1'	0.68725
																		Y'	F'	C'	M1'	0.623228
																		Y'	F'	C'	M1'	0.660238
																		Y'	F'	C'	M1'	0.653283
																		Y'	F'	C'	M1'	0.693807
																		Y'	F'	C'	M1'	0.664676
																		Y'	F'	C'	M1'	0.592619
																		Y'	F'	C'	M1'	0.616467
																		Y'	F'	C'	M1'	0.647073
																		Y'	F'	C'	M1'	0.671309
																		Y'	F'	C'	M1'	0.807536
																		Y'	F'	C'	M1'	0.573396
																		Y'	F'	C'	M1'	0.744252
																		Y'	F'	C'	M1'	0.762901
																		Y'	F'	C'	M1'	0.773938
																		Y'	F'	C'	M1'	0.534309
																		Y'	F'	C'	M1'	0.66612
																		Y'	F'	C'	M1'	0.645449
																		Y'	F'	C'	M1'	0.440221
																		Y'	F'	C'	M1'	0.660267
																		Y'	F'	C'	S1'	0.419898
																		Y'	F'	C'	S1'	0.47853
																		Y'	F'	C'	S1'	0.30045
																		Y'	F'	C'	S1'	0.378539
																		Y'	F'	C'	S1'	0.268969
																		Y'	F'	C'	S1'	0.631217
																		Y'	F'	C'	S1'	0.420483
																		Y'	F'	C'	S1'	0.386005
																		Y'	F'	C'	S1'	0.479334
																		Y'	F'	C'	S1'	0.488331
																		Y'	F'	C'	S1'	0.424999
																		Y'	F'	C'	S1'	0.416114
																		Y'	F'	C'	S1'	0.27915
																		Y'	F'	C'	S1'	0.35584
																		Y'	F'	C'	S1'	0.356544
																		Y'	F'	C'	S1'	0.495212
																		Y'	F'	C'	S1'	0.56075
																		Y'	F'	C'	S1'	0.516543
																		Y'	F'	C'	S1'	0.576744
																		Y'	F'	C'	S1'	0.500665
																		Y'	F'	C'	S1'	0.255764
																		Y'	F'	C'	S1'	0.470676
																		Y'	F'	C'	S1'	0.449148
																		Y'	F'	C'	S1'	0.324547
																		Y'	F'	C'	S1'	0.451384
																		Y'	F'	NB'	M1'	0.564065
																		Y'	F'	NB'	M1'	0.49673
																		Y'	F'	NB'	M1'	0.583085
																		Y'	F'	NB'	M1'	0.507498
																		Y'	F'	NB'	M1'	0.550194
																		Y'	F'	NB'	M1'	0.467154
																		Y'	F'	NB'	M1'	0.599199
																		Y'	F'	NB'	M1'	0.466581
																		Y'	F'	NB'	M1'	0.38248
																		Y'	F'	NB'	M1'	0.389336
																		Y'	F'	NB'	M1'	0.634682
																		Y'	F'	NB'	M1'	0.729991
																		Y'	F'	NB'	M1'	0.663497
																		Y'	F'	NB'	M1'	0.586797
																		Y'	F'	NB'	M1'	0.570946
																		Y'	F'	NB'	M1'	0.575991
																		Y'	F'	NB'	M1'	0.379991
																		Y'	F'	NB'	M1'	0.555576
																		Y'	F'	NB'	M1'	0.573837
																		Y'	F'	NB'	M1'	0.675529
																		Y'	F'	NB'	M1'	0.635768
																		Y'	F'	NB'	M1'	0.493999
																		Y'	F'	NB'	M1'	0.688939
																		Y'	F'	NB'	M1'	0.54445
																		Y'	F'	NB'	M1'	0.655004
																		Y'	F'	NB'	S1'	0.15364
																		Y'	F'	NB'	S1'	0.185618
																		Y'	F'	NB'	S1'	0.178145
																		Y'	F'	NB'	S1'	0.0622026
																		Y'	F'	NB'	S1'	0.114957
																		Y'	F'	NB'	S1'	0.18148
																		Y'	F'	NB'	S1'	0.236286
																		Y'	F'	NB'	S1'	0.181315
																		Y'	F'	NB'	S1'	0.11814
																		Y'	F'	NB'	S1'	0.202483
																		Y'	F'	NB'	S1'	0.253439
																		Y'	F'	NB'	S1'	0.110318
																		Y'	F'	NB'	S1'	0.192966
																		Y'	F'	NB'	S1'	0.152766
																		Y'	F'	NB'	S1'	0.183183
																		Y'	F'	NB'	S1'	0.160598
																		Y'	F'	NB'	S1'	0.318553
																		Y'	F'	NB'	S1'	0.202619
																		Y'	F'	NB'	S1'	0.16118
																		Y'	F'	NB'	S1'	0.160853
																		Y'	F'	NB'	S1'	0.112384
																		Y'	F'	NB'	S1'	0.142939
																		Y'	F'	NB'	S1'	0.115855
																		Y'	F'	NB'	S1'	0.225591
																		Y'	F'	NB'	S1'	0.211019
																		R'	D'	C'	M1'	0.782043
																		R'	D'	C'	M1'	0.880308
																		R'	D'	C'	M1'	0.78856
																		R'	D'	C'	M1'	0.771838
																		R'	D'	C'	M1'	0.908267
																		R'	D'	C'	M1'	0.913887
																		R'	D'	C'	M1'	0.812077
																		R'	D'	C'	M1'	0.980756
																		R'	D'	C'	M1'	0.756254
																		R'	D'	C'	M1'	0.882958
																		R'	D'	C'	M1'	0.75649
																		R'	D'	C'	M1'	0.841009
																		R'	D'	C'	M1'	0.713781
																		R'	D'	C'	M1'	0.840722
																		R'	D'	C'	M1'	0.785038
																		R'	D'	C'	M1'	0.879905
																		R'	D'	C'	M1'	0.802228
																		R'	D'	C'	M1'	0.820214
																		R'	D'	C'	M1'	0.760426
																		R'	D'	C'	M1'	0.654209
																		R'	D'	C'	M1'	0.799763
																		R'	D'	C'	M1'	0.809197
																		R'	D'	C'	M1'	0.847182
																		R'	D'	C'	M1'	0.744448
																		R'	D'	C'	M1'	0.696812
																		R'	D'	C'	S1'	0.765494
																		R'	D'	C'	S1'	0.357317
																		R'	D'	C'	S1'	0.103571
																		R'	D'	C'	S1'	0.197427
																		R'	D'	C'	S1'	0.331942
																		R'	D'	C'	S1'	0.00328837
																		R'	D'	C'	S1'	0.266411
																		R'	D'	C'	S1'	8.38e-06
																		R'	D'	C'	S1'	0.581263
																		R'	D'	C'	S1'	0.291037
																		R'	D'	C'	S1'	0.0743314
																		R'	D'	C'	S1'	0.226389
																		R'	D'	C'	S1'	0.0729193
																		R'	D'	C'	S1'	0.00177057
																		R'	D'	C'	S1'	0.0182695
																		R'	D'	C'	S1'	0.149336
																		R'	D'	C'	S1'	0.0935724
																		R'	D'	C'	S1'	0.0304128
																		R'	D'	C'	S1'	0.0908751
																		R'	D'	C'	S1'	0.323644
																		R'	D'	C'	S1'	0.379312
																		R'	D'	C'	S1'	0.0439256
																		R'	D'	C'	S1'	0.167216
																		R'	D'	C'	S1'	0.235797
																		R'	D'	C'	S1'	0.351915
																		R'	D'	NB'	M1'	0.465197
																		R'	D'	NB'	M1'	0.459465
																		R'	D'	NB'	M1'	0.650935
																		R'	D'	NB'	M1'	0.501621
																		R'	D'	NB'	M1'	0.655684
																		R'	D'	NB'	M1'	0.636407
																		R'	D'	NB'	M1'	0.558415
																		R'	D'	NB'	M1'	0.517488
																		R'	D'	NB'	M1'	0.336486
																		R'	D'	NB'	M1'	0.536191
																		R'	D'	NB'	M1'	0.721336
																		R'	D'	NB'	M1'	0.569799
																		R'	D'	NB'	M1'	0.622552
																		R'	D'	NB'	M1'	0.718037
																		R'	D'	NB'	M1'	0.486267
																		R'	D'	NB'	M1'	0.39724
																		R'	D'	NB'	M1'	0.278321
																		R'	D'	NB'	M1'	0.00691876
																		R'	D'	NB'	M1'	0.542567
																		R'	D'	NB'	M1'	0.343041
																		R'	D'	NB'	M1'	0.535508
																		R'	D'	NB'	M1'	0.34781
																		R'	D'	NB'	M1'	0.43093
																		R'	D'	NB'	M1'	0.478368
																		R'	D'	NB'	M1'	0.681485
																		R'	D'	NB'	S1'	0.0301758
																		R'	D'	NB'	S1'	0.15682
																		R'	D'	NB'	S1'	0.0661665
																		R'	D'	NB'	S1'	0.213519
																		R'	D'	NB'	S1'	0.117255
																		R'	D'	NB'	S1'	0.0635678
																		R'	D'	NB'	S1'	0.103527
																		R'	D'	NB'	S1'	1.15e-32
																		R'	D'	NB'	S1'	0.421061
																		R'	D'	NB'	S1'	0.0725985
																		R'	D'	NB'	S1'	0.0438724
																		R'	D'	NB'	S1'	0.0233126
																		R'	D'	NB'	S1'	0.0552797
																		R'	D'	NB'	S1'	0.345597
																		R'	D'	NB'	S1'	0.240919
																		R'	D'	NB'	S1'	0.00428784
																		R'	D'	NB'	S1'	0.00224648
																		R'	D'	NB'	S1'	0.0534891
																		R'	D'	NB'	S1'	0.216045
																		R'	D'	NB'	S1'	0.342857
																		R'	D'	NB'	S1'	0.0340157
																		R'	D'	NB'	S1'	0.00097206
																		R'	D'	NB'	S1'	0.0460854
																		R'	D'	NB'	S1'	8.39e-05
																		R'	D'	NB'	S1'	0.204012
																		Y'	D'	C'	M1'	0.604245
																		Y'	D'	C'	M1'	0.275883
																		Y'	D'	C'	M1'	0.686822
																		Y'	D'	C'	M1'	0.279619
																		Y'	D'	C'	M1'	0.56897
																		Y'	D'	C'	M1'	0.545293
																		Y'	D'	C'	M1'	0.309492
																		Y'	D'	C'	M1'	0.4504
																		Y'	D'	C'	M1'	0.601598
																		Y'	D'	C'	M1'	0.630345
																		Y'	D'	C'	M1'	0.692638
																		Y'	D'	C'	M1'	0.381244
																		Y'	D'	C'	M1'	0.235771
																		Y'	D'	C'	M1'	0.490576
																		Y'	D'	C'	M1'	0.691374
																		Y'	D'	C'	M1'	0.270511
																		Y'	D'	C'	M1'	0.299947
																		Y'	D'	C'	M1'	0.142247
																		Y'	D'	C'	M1'	0.40598
																		Y'	D'	C'	M1'	0.285902
																		Y'	D'	C'	M1'	0.70039
																		Y'	D'	C'	M1'	0.757587
																		Y'	D'	C'	M1'	0.557809
																		Y'	D'	C'	M1'	0.208413
																		Y'	D'	C'	M1'	0.546997
																		Y'	D'	C'	S1'	0.0459218
																		Y'	D'	C'	S1'	0.0501269
																		Y'	D'	C'	S1'	0.141688
																		Y'	D'	C'	S1'	0.16842
																		Y'	D'	C'	S1'	0.0983595
																		Y'	D'	C'	S1'	0.382258
																		Y'	D'	C'	S1'	0.0820285
																		Y'	D'	C'	S1'	0.16819
																		Y'	D'	C'	S1'	0.0512053
																		Y'	D'	C'	S1'	0.29915
																		Y'	D'	C'	S1'	0.112942
																		Y'	D'	C'	S1'	0.0373615
																		Y'	D'	C'	S1'	0.00942853
																		Y'	D'	C'	S1'	0.00215236
																		Y'	D'	C'	S1'	0.00025153
																		Y'	D'	C'	S1'	0.228724
																		Y'	D'	C'	S1'	0.348778
																		Y'	D'	C'	S1'	0.135138
																		Y'	D'	C'	S1'	0.090908
																		Y'	D'	C'	S1'	0.0994397
																		Y'	D'	C'	S1'	0.458408
																		Y'	D'	C'	S1'	0.00523586
																		Y'	D'	C'	S1'	0.00041299
																		Y'	D'	C'	S1'	0.0453912
																		Y'	D'	C'	S1'	0.0485558
																		Y'	D'	NB'	M1'	0.367576
																		Y'	D'	NB'	M1'	0.0139854
																		Y'	D'	NB'	M1'	0.139114
																		Y'	D'	NB'	M1'	0.432593
																		Y'	D'	NB'	M1'	0.579699
																		Y'	D'	NB'	M1'	0.345917
																		Y'	D'	NB'	M1'	0.372806
																		Y'	D'	NB'	M1'	0.366408
																		Y'	D'	NB'	M1'	0.356543
																		Y'	D'	NB'	M1'	0.264733
																		Y'	D'	NB'	M1'	0.31992
																		Y'	D'	NB'	M1'	0.164323
																		Y'	D'	NB'	M1'	0.00838497
																		Y'	D'	NB'	M1'	0.0112804
																		Y'	D'	NB'	M1'	0.148703
																		Y'	D'	NB'	M1'	0.167491
																		Y'	D'	NB'	M1'	0.0136288
																		Y'	D'	NB'	M1'	0.137834
																		Y'	D'	NB'	M1'	0.172639
																		Y'	D'	NB'	M1'	0.118551
																		Y'	D'	NB'	M1'	0.254735
																		Y'	D'	NB'	M1'	0.357742
																		Y'	D'	NB'	M1'	0.25111
																		Y'	D'	NB'	M1'	0.524371
																		Y'	D'	NB'	M1'	0.497661
																		Y'	D'	NB'	S1'	0.0321886
																		Y'	D'	NB'	S1'	0.00029846
																		Y'	D'	NB'	S1'	0.0219021
																		Y'	D'	NB'	S1'	0.00234867
																		Y'	D'	NB'	S1'	0.200657
																		Y'	D'	NB'	S1'	0.0722802
																		Y'	D'	NB'	S1'	0.00401514
																		Y'	D'	NB'	S1'	0.0717743
																		Y'	D'	NB'	S1'	0.213458
																		Y'	D'	NB'	S1'	0.0452562
																		Y'	D'	NB'	S1'	0.0365678
																		Y'	D'	NB'	S1'	0.0978462
																		Y'	D'	NB'	S1'	0.207709
																		Y'	D'	NB'	S1'	0.161531
																		Y'	D'	NB'	S1'	0.232643
																		Y'	D'	NB'	S1'	0.0276252
																		Y'	D'	NB'	S1'	0.0001177
																		Y'	D'	NB'	S1'	0.00365225
																		Y'	D'	NB'	S1'	0.0064635
																		Y'	D'	NB'	S1'	0.0453196
																		Y'	D'	NB'	S1'	0.180946
																		Y'	D'	NB'	S1'	0.109778
																		Y'	D'	NB'	S1'	0.00870299
																		Y'	D'	NB'	S1'	0.0940452
																		Y'	D'	NB'	S1'	0.089846
